# Supplementary material for: Comprehensive analysis of the prognostic value and immunological role of IDO1 gene in pan-cancer
Source: Eur J Med Res. 2024 Mar 27;29:206. doi: 10.1186/s40001-024-01766-y (PMC10967207; doi:10.1186/s40001-024-01766-y)
Supplement: Supplementary file 2 — Additional file 2: Table S1. Expression levels of IDO1 comparing tumor and normal tissues from TCGA database. Table S2. Expression levels of IDO1 comparing tumor and normal tissues from TCGA and GTEx database. Table S3. Clinical annotation and Pathological features of the individual patient in TCGA database. Table S4. Expression levels of IDO1 comparing tumor and normal tissues in K-M survival curves(OS). [file 40001_2024_1766_MOESM2_ESM.xlsx]

## Sheet: Table S1
Supplementary Table S1. Expression levels of IDO1 comparing tumor and normal tissues from TCGA database.
Group1	Group2	Number	Minimum value	Maximum value	Median	IQR	Mean	SD	SE
ACC	Tumor	79	0.230326	7.9	2.04107	1.63483	2.23168	1.27994	0.144005
BLCA	Normal	19	0.147697	5.26498	1.64275	2.18589	2.23334	1.5768	0.361742
BLCA	Tumor	412	0.0219061	10.1473	2.40191	3.3892	2.96719	2.31378	0.113992
BRCA	Normal	113	0.511063	4.62133	1.8737	1.32647	1.99966	0.913293	0.0859154
BRCA	Tumor	1113	0.0554733	10.3539	2.24339	2.26581	2.61253	1.72754	0.0517823
CESC	Normal	3	0.988994	4.53305	1.87594	1.77203	2.46599	1.84423	1.06477
CESC	Tumor	306	0.359296	10.6892	4.89335	3.46607	5.1372	2.2497	0.128607
CHOL	Normal	9	0.154324	0.866948	0.60483	0.366359	0.492486	0.243108	0.0810362
CHOL	Tumor	35	0.0832474	5.72252	1.49513	2.05175	1.7653	1.60698	0.271629
COAD	Normal	41	1.2122	7.69994	2.06361	0.726851	2.44499	1.32623	0.207122
COAD	Tumor	480	0	10.2022	2.626	2.26618	2.91604	1.7	0.077594
DLBC	Tumor	48	1.66798	9.3019	4.93091	2.50366	4.93488	1.86533	0.269237
ESCA	Normal	11	0.341872	4.73533	0.903193	0.715937	1.29169	1.21946	0.36768
ESCA	Tumor	163	0.170438	9.18304	2.76797	2.94312	3.18758	2.06507	0.161749
GBM	Normal	5	0	0.059909	0.026021	0.0529723	0.0277804	0.0283438	0.0126757
GBM	Tumor	169	0	5.46174	0.635801	1.03134	0.973518	1.01325	0.0779425
HNSC	Normal	44	0.273695	7.42808	1.44523	1.75423	1.87464	1.5664	0.236144
HNSC	Tumor	504	0.0515809	9.54688	3.54207	3.31535	3.85098	2.15526	0.0960031
KICH	Normal	25	0.211261	2.33277	1.0425	1.0164	1.1453	0.646313	0.129263
KICH	Tumor	65	0.0953168	3.81483	1.73457	2.17261	1.87471	1.19389	0.148083
KIRC	Normal	72	0.222928	6.85183	0.94961	0.917951	1.26595	0.949751	0.111929
KIRC	Tumor	541	0.220949	7.95728	4.5536	1.99509	4.41753	1.42503	0.0612668
KIRP	Normal	32	0.202136	2.84326	0.937588	0.832099	1.07613	0.656458	0.116047
KIRP	Tumor	291	0.177089	5.59316	1.36989	1.35212	1.57728	0.989158	0.0579855
LAML	Tumor	150	0	2.01121	0.0396997	0.101213	0.18416	0.413045	0.033725
LGG	Tumor	532	0	7.32069	0.0470497	0.2266	0.281377	0.679645	0.0294663
LIHC	Normal	50	0	3.70183	0.540027	0.48628	0.756105	0.652322	0.0922522
LIHC	Tumor	374	0	6.61023	1.03175	1.27073	1.34441	1.1074	0.0572624
LUAD	Normal	59	1.68925	6.99734	4.71079	1.40585	4.62538	1.0585	0.137805
LUAD	Tumor	539	0.728225	9.66715	4.07794	2.30951	4.26767	1.63488	0.0704191
LUSC	Normal	49	2.78136	7.34818	4.84186	1.76645	4.84098	1.11729	0.159613
LUSC	Tumor	502	0.259544	9.08358	4.10666	2.33726	4.14139	1.68081	0.0750183
MESO	Tumor	87	0	9.37628	2.14763	1.77808	2.5116	1.79616	0.192569
OV	Tumor	381	0.0946415	8.64285	3.39962	2.47154	3.40604	1.69458	0.0868158
PAAD	Normal	4	2.01157	4.48597	2.54952	1.02957	2.89915	1.11062	0.555308
PAAD	Tumor	179	0.286645	8.36143	2.42664	1.80118	2.67078	1.45705	0.108905
PCPG	Normal	3	0.0809305	0.24817	0.24062	0.08362	0.189907	0.0944518	0.0545318
PCPG	Tumor	184	0.0216219	5.22208	1.90518	2.025	1.97627	1.24955	0.0921177
PRAD	Normal	52	0.354452	4.53369	1.82273	1.76076	1.90176	0.999266	0.138573
PRAD	Tumor	501	0.0244615	5.85699	1.98667	1.47042	2.12679	1.07997	0.0482496
READ	Normal	10	0.731878	2.90285	2.26059	0.653864	2.18025	0.644144	0.203696
READ	Tumor	167	0.216982	9.55019	2.42753	1.82618	2.6746	1.55298	0.120173
SARC	Normal	2	0.574731	1.35823	0.966479	0.391748	0.966479	0.554015	0.391748
SARC	Tumor	263	0	9.46522	3.16514	2.85692	3.39546	2.08692	0.128685
SKCM	Normal	1	5.24632	5.24632	5.24632	0	5.24632
SKCM	Tumor	472	0	9.00622	2.39799	2.85047	2.76702	1.99638	0.0918907
STAD	Normal	32	0.145873	3.55081	1.15448	1.03865	1.326	0.878384	0.155278
STAD	Tumor	375	0.321004	10.6476	3.03499	2.28094	3.42951	2.0635	0.106559
TGCT	Tumor	156	0.705845	6.70342	3.31473	1.84522	3.39123	1.29057	0.103329
THCA	Normal	59	0.593019	5.71674	3.22896	1.57556	3.11912	1.29248	0.168267
THCA	Tumor	512	0	6.20217	1.60226	1.79918	1.90368	1.31596	0.0581577
THYM	Normal	2	3.39295	4.26993	3.83144	0.438491	3.83144	0.62012	0.438491
THYM	Tumor	120	1.10199	7.95603	3.26765	1.22831	3.32712	1.10864	0.101205
UCEC	Normal	35	0.351628	6.65031	2.22324	2.16117	2.66763	1.83729	0.310558
UCEC	Tumor	554	0.332507	10.5639	4.66758	2.40646	4.84774	1.75517	0.0745699
UCS	Tumor	57	0.469886	8.9235	3.35433	2.00904	3.54436	1.58476	0.209907
UVM	Tumor	80	0	5.65952	0.181988	0.678659	0.7269	1.22775	0.137267

## Sheet: Table S2
Supplementary Table S2. Expression levels of IDO1 comparing tumor and normal tissues from TCGA and GTEx database.
Group1	Group2	Number	Minimum value	Maximum value	Median	IQR	Mean	SD	SE
ACC	Normal	128	0	2.64613	0.286878	0.261402	0.368373	0.357126	0.0315658
ACC	Tumor	77	0.201631	7.82537	2.23879	1.37047	2.275	1.27219	0.144979
BLCA	Normal	28	0.137501	5.14162	1.07313	2.27943	1.60829	1.48987	0.281558
BLCA	Tumor	407	0.0285685	9.97264	2.43832	3.33748	2.87374	2.26308	0.112176
BRCA	Normal	292	0	5.81611	1.01436	1.33467	1.2527	0.98	0.0573502
BRCA	Tumor	1099	0.0703873	10.0373	1.95237	2.15777	2.38076	1.681	0.050707
CESC	Normal	13	0	4.22037	1.08407	1.72131	1.47852	1.51935	0.421392
CESC	Tumor	306	0.344836	10.694	4.74632	3.39466	4.93307	2.26227	0.129325
CHOL	Normal	9	0.137501	0.823748	0.505893	0.365013	0.542184	0.236363	0.0787877
CHOL	Tumor	36	0.042644	5.52857	1.39219	1.86807	1.74513	1.5993	0.266549
COAD	Normal	349	0	7.46588	0.848008	1.26035	1.16815	1.02529	0.0548826
COAD	Tumor	290	0	9.92388	2.38957	2.28076	2.65749	1.73659	0.101976
DLBC	Normal	444	0	4.80732	0.275004	0.670039	0.597213	0.768926	0.0364916
DLBC	Tumor	47	1.48543	9.39235	4.85701	2.47699	4.80547	1.89901	0.276999
ESCA	Normal	666	0	7.78147	0.411425	0.593241	0.619553	0.68263	0.0264514
ESCA	Tumor	182	0.124327	9.07607	2.54838	2.94776	2.98859	1.99325	0.14775
GBM	Normal	1157	0	7.68184	0	0.0285685	0.0911629	0.592816	0.0174282
GBM	Tumor	166	0	5.21688	0.575314	0.863299	0.863118	0.946011	0.0734247
HNSC	Normal	44	0.238793	7.28934	1.38954	1.57317	1.8209	1.53983	0.232138
HNSC	Tumor	520	0.124327	9.53504	3.38682	3.27038	3.66428	2.12571	0.0932185
KICH	Normal	53	0	5.37535	0.687044	1.05025	0.937415	0.898041	0.123355
KICH	Tumor	66	0.163501	3.969	1.97394	2.274	1.97883	1.22722	0.15106
KIRC	Normal	100	0	6.50792	0.819669	0.864977	1.08522	0.966815	0.0966815
KIRC	Tumor	531	0.286878	7.61915	4.27949	1.99883	4.20699	1.38849	0.0602554
KIRP	Normal	60	0	5.37535	0.709282	0.898101	0.941755	0.87224	0.112606
KIRP	Tumor	289	0.0976133	5.23304	1.37853	1.30543	1.566	0.965904	0.0568179
LAML	Normal	70	0	0.485434	0.0976133	0.104427	0.120634	0.111954	0.0133811
LAML	Tumor	173	0	1.7181	0	0.137501	0.16548	0.352012	0.026763
LGG	Normal	1152	0	7.68184	0	0.0285685	0.0913645	0.594087	0.0175035
LGG	Tumor	523	0	6.81823	0.0565848	0.201631	0.247844	0.606538	0.026522
LIHC	Normal	160	0	3.73335	0.256997	0.481087	0.421412	0.517836	0.0409385
LIHC	Tumor	371	0	6.55273	1.0072	1.3029	1.33196	1.09353	0.0567732
LUAD	Normal	347	0	7.52803	3.52981	2.06934	3.63894	1.37048	0.073571
LUAD	Tumor	515	0.731174	9.32325	3.8545	2.24616	4.06539	1.63122	0.07188
LUSC	Normal	338	0	7.52803	3.52858	2.0604	3.65268	1.39611	0.0759384
LUSC	Tumor	498	0.310339	8.87817	3.83993	2.31997	3.90326	1.68611	0.0755563
MESO	Tumor	87	0	9.57639	1.86787	1.80763	2.24034	1.78902	0.191803
OV	Normal	88	0	2.0566	0.269022	0.439687	0.411098	0.434578	0.0463262
OV	Tumor	427	0	8.44345	3.13258	2.43954	3.18356	1.67578	0.0810966
PAAD	Normal	171	0	4.20003	0.189038	0.239451	0.311596	0.460683	0.0352293
PAAD	Tumor	179	0.189038	8.09349	2.19851	1.62977	2.50716	1.40167	0.104766
PCPG	Normal	3	0.0976133	0.250954	0.201631	0.0766706	0.1834	0.0782794	0.0451947
PCPG	Tumor	182	0	4.92929	1.85989	1.91574	1.90676	1.23972	0.0918942
PRAD	Normal	152	0.0285685	7.89467	0.97085	1.12802	1.19798	1.01242	0.0821182
PRAD	Tumor	496	0.042644	5.67803	1.78868	1.35961	1.93121	1.03105	0.0462956
READ	Normal	318	0	4.51916	0.76129	1.11785	1.03504	0.866683	0.0486012
READ	Tumor	93	0.286878	6.85619	2.21104	1.77224	2.44853	1.3577	0.140787
SARC	Normal	2	0.485434	1.01436	0.749899	0.264465	0.749899	0.37401	0.264465
SARC	Tumor	262	0	9.25456	2.73104	2.79544	3.04938	2.04802	0.126527
SKCM	Normal	813	0	5.01924	0.275004	0.458203	0.372877	0.400125	0.014033
SKCM	Tumor	469	0	8.83147	2.22651	2.83442	2.58541	1.95188	0.0901295
STAD	Normal	210	0	4.87922	0.495692	0.95036	0.803119	0.799339	0.0551596
STAD	Tumor	414	0.275004	10.4269	2.81654	2.38989	3.26416	2.03112	0.0998243
TGCT	Normal	165	0.124327	1.2265	0.422222	0.284211	0.466861	0.223113	0.0173694
TGCT	Tumor	154	0.411425	6.06282	3.14478	1.94048	3.17656	1.3226	0.106578
THCA	Normal	338	0	5.47967	1.99457	1.2514	2.09871	1.02769	0.0558989
THCA	Tumor	512	0	5.78842	1.42492	1.74747	1.73414	1.28593	0.0568306
THYM	Normal	446	0	4.80732	0.275004	0.707575	0.610736	0.793698	0.0375827
THYM	Tumor	119	0.807361	8.14799	2.89142	1.48804	3.00479	1.14744	0.105186
UCEC	Normal	101	0.042644	6.18761	0.74845	0.988576	1.12022	1.26649	0.12602
UCEC	Tumor	181	0.298665	10.807	4.85054	2.70058	4.90578	1.90614	0.141682
UCS	Normal	78	0.042644	4.359	0.495692	0.706504	0.716432	0.696913	0.0789098
UCS	Tumor	57	0.275004	8.60541	2.94114	2.1067	3.22948	1.58557	0.210015
UVM	Tumor	79	0	5.44057	0.21412	0.681159	0.710917	1.17733	0.13246

## Sheet: Table S3
Supplementary Table S3. Clinical annotation and Pathological featuresrn of the individual patient in TCGA database.
sample	_PATIENT	cancer type abbreviation	age_at_initial_pathologic_diagnosis	gender	race	ajcc_pathologic_tumor_stage	clinical_stage	histological_type	histological_grade	initial_pathologic_dx_year	menopause_status	birth_days_to	vital_status	tumor_status	last_contact_days_to	death_days_to	cause_of_death	new_tumor_event_type	new_tumor_event_site	new_tumor_event_site_other	new_tumor_event_dx_days_to	treatment_outcome_first_course	margin_status	residual_tumor	OS	OS.time	DSS	DSS.time	DFI	DFI.time	PFI	PFI.time	Redaction
TCGA-OR-A5J1-01	TCGA-OR-A5J1	ACC	58	MALE	WHITE	Stage II		Adrenocortical carcinoma- Usual Type		2000		-21496	Dead	WITH TUMOR		1355		Distant Metastasis	Peritoneal Surfaces		754	Complete Remission/Response			1	1355	1	1355	1	754	1	754
TCGA-OR-A5J2-01	TCGA-OR-A5J2	ACC	44	FEMALE	WHITE	Stage IV		Adrenocortical carcinoma- Usual Type		2004		-16090	Dead	WITH TUMOR		1677		Distant Metastasis	Soft Tissue		289	Progressive Disease			1	1677	1	1677			1	289
TCGA-OR-A5J3-01	TCGA-OR-A5J3	ACC	23	FEMALE	WHITE	Stage III		Adrenocortical carcinoma- Usual Type		2008		-8624	Alive	WITH TUMOR	2091			Distant Metastasis	Lung		53	Complete Remission/Response			0	2091	0	2091	1	53	1	53
TCGA-OR-A5J4-01	TCGA-OR-A5J4	ACC	23	FEMALE	WHITE	Stage IV		Adrenocortical carcinoma- Usual Type		2000		-8451	Dead	WITH TUMOR		423		Locoregional Recurrence	Peritoneal Surfaces		126	Progressive Disease			1	423	1	423			1	126
TCGA-OR-A5J5-01	TCGA-OR-A5J5	ACC	30	MALE	WHITE	Stage III		Adrenocortical carcinoma- Usual Type		2000		-11171	Dead	WITH TUMOR		365		Locoregional Recurrence	Other, specify	vena cava thrombus	50	Progressive Disease			1	365	1	365			1	50
TCGA-OR-A5J6-01	TCGA-OR-A5J6	ACC	29	FEMALE	BLACK OR AFRICAN AMERICAN	Stage II		Adrenocortical carcinoma- Usual Type		2006		-10839	Alive	TUMOR FREE	2703							Complete Remission/Response			0	2703	0	2703	0	2703	0	2703
TCGA-OR-A5J7-01	TCGA-OR-A5J7	ACC	30	FEMALE	WHITE	Stage III		Adrenocortical carcinoma- Usual Type		2009		-11279	Dead	WITH TUMOR		490		Locoregional Recurrence	Retroperitoneal lymph nodes		162	Progressive Disease			1	490	1	490			1	162
TCGA-OR-A5J8-01	TCGA-OR-A5J8	ACC	66	MALE	WHITE	Stage III		Adrenocortical carcinoma- Usual Type		2011		-24266	Dead	WITH TUMOR		579		Locoregional Recurrence	Peritoneal Surfaces		530	Complete Remission/Response			1	579	1	579	1	530	1	530
TCGA-OR-A5J9-01	TCGA-OR-A5J9	ACC	22	FEMALE	WHITE	Stage II		Adrenocortical carcinoma- Usual Type		2010		-8175	Alive	WITH TUMOR	1352			Distant Metastasis	Lung		414	Complete Remission/Response			0	1352	0	1352	1	414	1	414
TCGA-OR-A5JA-01	TCGA-OR-A5JA	ACC	53	FEMALE	WHITE	Stage IV		Adrenocortical carcinoma- Usual Type		2004		-19436	Dead	WITH TUMOR		922									1	922	1	922			1	922
TCGA-OR-A5JB-01	TCGA-OR-A5JB	ACC	52	MALE	WHITE	Stage IV		Adrenocortical carcinoma- Usual Type		2000		-19172	Dead			551						[Unknown]			1	551		551			0	551
TCGA-OR-A5JC-01	TCGA-OR-A5JC	ACC	37	MALE	WHITE			Adrenocortical carcinoma- Usual Type		2001		-13862	Dead			1750									1	1750		1750			0	1750
TCGA-OR-A5JD-01	TCGA-OR-A5JD	ACC	57	FEMALE	WHITE	Stage II		Adrenocortical Carcinoma- Oncocytic Type		2005		-20989	Alive	TUMOR FREE	3038							Complete Remission/Response			0	3038	0	3038	0	3038	0	3038
TCGA-OR-A5JE-01	TCGA-OR-A5JE	ACC	17	FEMALE	WHITE	Stage I		Adrenocortical carcinoma- Usual Type		2005		-6455	Dead	WITH TUMOR		2105		Locoregional Recurrence			477	[Unknown]			1	2105	1	2105			1	477
TCGA-OR-A5JF-01	TCGA-OR-A5JF	ACC	69	FEMALE	WHITE	Stage II		Adrenocortical carcinoma- Usual Type		2007		-25502	Alive	TUMOR FREE	2015							Complete Remission/Response			0	2015	0	2015	0	2015	0	2015
TCGA-OR-A5JG-01	TCGA-OR-A5JG	ACC	61	MALE	WHITE	Stage IV		Adrenocortical carcinoma- Usual Type		2008		-22390	Dead	WITH TUMOR		541									1	541	1	541			1	541
TCGA-OR-A5JH-01	TCGA-OR-A5JH	ACC	32	FEMALE	WHITE	Stage II		Adrenocortical Carcinoma- Oncocytic Type		2008		-11994	Alive	TUMOR FREE	2110							Complete Remission/Response			0	2110	0	2110	0	2110	0	2110
TCGA-OR-A5JI-01	TCGA-OR-A5JI	ACC	22	MALE	WHITE	Stage I		Adrenocortical carcinoma- Usual Type		2008		-8177	Alive	TUMOR FREE	2331							Complete Remission/Response			0	2331	0	2331	0	2331	0	2331
TCGA-OR-A5JJ-01	TCGA-OR-A5JJ	ACC	65	MALE	WHITE	Stage IV		Adrenocortical carcinoma- Usual Type		2009		-24082	Dead	WITH TUMOR		490						Progressive Disease			1	490	1	490			1	490
TCGA-OR-A5JK-01	TCGA-OR-A5JK	ACC	49	MALE	WHITE	Stage IV		Adrenocortical carcinoma- Usual Type		2009		-18214	Alive	TUMOR FREE	1497							Partial Remission/Response			0	1497	0	1497			0	1497
TCGA-OR-A5JL-01	TCGA-OR-A5JL	ACC	36	FEMALE	WHITE	Stage I		Adrenocortical carcinoma- Usual Type		2009		-13155	Alive	TUMOR FREE	2056							Complete Remission/Response			0	2056	0	2056	0	2056	0	2056
TCGA-OR-A5JM-01	TCGA-OR-A5JM	ACC	25	FEMALE	WHITE	Stage IV		Adrenocortical carcinoma- Usual Type		2011		-9359	Dead	WITH TUMOR		562		Distant Metastasis	Liver		72	Progressive Disease			1	562	1	562			1	72
TCGA-OR-A5JO-01	TCGA-OR-A5JO	ACC	26	FEMALE	WHITE	Stage I		Adrenocortical carcinoma- Usual Type		2005		-9547	Alive	TUMOR FREE	1194							Complete Remission/Response			0	1194	0	1194	0	1194	0	1194
TCGA-OR-A5JP-01	TCGA-OR-A5JP	ACC	40	MALE	WHITE	Stage II		Adrenocortical carcinoma- Usual Type		2012		-14667	Alive	TUMOR FREE	464							Complete Remission/Response			0	464	0	464	0	464	0	464
TCGA-OR-A5JQ-01	TCGA-OR-A5JQ	ACC	26	FEMALE	WHITE	Stage II		Adrenocortical Carcinoma- Myxoid Type		2006		-9667	Alive	TUMOR FREE	1103							Complete Remission/Response			0	1103	0	1103	0	1103	0	1103
TCGA-OR-A5JR-01	TCGA-OR-A5JR	ACC	45	MALE	WHITE	Stage I		Adrenocortical carcinoma- Usual Type		2002		-16604	Alive	TUMOR FREE	3688							Complete Remission/Response			0	3688	0	3688	0	3688	0	3688
TCGA-OR-A5JS-01	TCGA-OR-A5JS	ACC	65	FEMALE	WHITE	Stage II		Adrenocortical carcinoma- Usual Type		2011		-24017	Alive	WITH TUMOR	383			Distant Metastasis	Lung		166				0	383	0	383			1	166
TCGA-OR-A5JT-01	TCGA-OR-A5JT	ACC	65	FEMALE	WHITE	Stage II		Adrenocortical carcinoma- Usual Type		2011		-23794	Alive	WITH TUMOR	907							Stable Disease			0	907	0	907			0	907
TCGA-OR-A5JU-01	TCGA-OR-A5JU	ACC	58	FEMALE	WHITE	Stage III		Adrenocortical carcinoma- Usual Type		2010		-21292	Dead	WITH TUMOR		289		Distant Metastasis	Other, specify	Ovarian	268	Progressive Disease			1	289	1	289			1	268
TCGA-OR-A5JV-01	TCGA-OR-A5JV	ACC	55	MALE	WHITE	Stage II		Adrenocortical carcinoma- Usual Type		2008		-20319	Alive	TUMOR FREE	2023			New Primary Tumor	Lymph Node(s)		953	Complete Remission/Response			0	2023	0	2023	0	2023	1	953
TCGA-OR-A5JW-01	TCGA-OR-A5JW	ACC	47	MALE	WHITE	Stage II		Adrenocortical carcinoma- Usual Type		2008		-17513	Alive	TUMOR FREE	2202							Complete Remission/Response			0	2202	0	2202	0	2202	0	2202
TCGA-OR-A5JX-01	TCGA-OR-A5JX	ACC	50	MALE	WHITE	Stage III		Adrenocortical carcinoma- Usual Type		2009		-18402	Alive	TUMOR FREE	950										0	950	0	950			0	950
TCGA-OR-A5JY-01	TCGA-OR-A5JY	ACC	68	FEMALE	WHITE	Stage IV		Adrenocortical carcinoma- Usual Type		2011		-25190	Dead	WITH TUMOR		552		Distant Metastasis	Liver		75	Progressive Disease			1	552	1	552			1	75
TCGA-OR-A5JZ-01	TCGA-OR-A5JZ	ACC	60	MALE	WHITE	Stage II		Adrenocortical carcinoma- Usual Type		2011		-22218	Alive	WITH TUMOR	822			Distant Metastasis	Liver		247	Progressive Disease			0	822	0	822			1	247
TCGA-OR-A5K0-01	TCGA-OR-A5K0	ACC	69	FEMALE	WHITE	Stage II		Adrenocortical carcinoma- Usual Type		2009		-25400	Alive	WITH TUMOR	1029			Distant Metastasis	Lung		659	Progressive Disease			0	1029	0	1029			1	659
TCGA-OR-A5K1-01	TCGA-OR-A5K1	ACC	48	MALE	WHITE	Stage II		Adrenocortical carcinoma- Usual Type		2006		-17596	Alive	TUMOR FREE	3289			Locoregional Recurrence	Peritoneal Surfaces		826	Complete Remission/Response			0	3289	0	3289	1	826	1	826
TCGA-OR-A5K2-01	TCGA-OR-A5K2	ACC	32	FEMALE	WHITE	Stage III		Adrenocortical carcinoma- Usual Type		2010		-11970	Dead	WITH TUMOR		994		Distant Metastasis	Lung		97	Progressive Disease			1	994	1	994			1	97
TCGA-OR-A5K3-01	TCGA-OR-A5K3	ACC	53	MALE	WHITE	Stage II		Adrenocortical Carcinoma- Oncocytic Type		2005		-19375	Alive	TUMOR FREE	3465							Complete Remission/Response			0	3465	0	3465	0	3465	0	3465
TCGA-OR-A5K4-01	TCGA-OR-A5K4	ACC	64	FEMALE	WHITE	Stage III		Adrenocortical carcinoma- Usual Type		2011		-23481	Alive	TUMOR FREE	1082							Complete Remission/Response			0	1082	0	1082	0	1082	0	1082
TCGA-OR-A5K5-01	TCGA-OR-A5K5	ACC	59	FEMALE	WHITE	Stage III		Adrenocortical carcinoma- Usual Type		2012		-21907	Dead	WITH TUMOR		498		Distant Metastasis	Lung		108	Progressive Disease			1	498	1	498			1	108
TCGA-OR-A5K6-01	TCGA-OR-A5K6	ACC	56	FEMALE	WHITE	Stage II		Adrenocortical carcinoma- Usual Type		2010		-20657	Alive	WITH TUMOR	1493			Distant Metastasis	Liver		391	Complete Remission/Response			0	1493	0	1493	1	391	1	391
TCGA-OR-A5K8-01	TCGA-OR-A5K8	ACC	39	MALE	WHITE	Stage II		Adrenocortical carcinoma- Usual Type		2012		-14435	Alive	TUMOR FREE	749							Complete Remission/Response			0	749	0	749	0	749	0	749
TCGA-OR-A5K9-01	TCGA-OR-A5K9	ACC	61	FEMALE	WHITE	Stage II		Adrenocortical carcinoma- Usual Type		2002		-22596	Dead	WITH TUMOR		344		Locoregional Recurrence	Peritoneal Surfaces		236				1	344	1	344			1	236
TCGA-OR-A5KB-01	TCGA-OR-A5KB	ACC	61	FEMALE	WHITE	Stage II		Adrenocortical carcinoma- Usual Type		2011		-22550	Alive	WITH TUMOR	741			Distant Metastasis	Soft Tissue		214	Progressive Disease			0	741	0	741			1	214
TCGA-OR-A5KO-01	TCGA-OR-A5KO	ACC	39	FEMALE	WHITE	Stage IV		Adrenocortical carcinoma- Usual Type		2009		-14606	Alive	WITH TUMOR	1414			Distant Metastasis	Lung		541	Progressive Disease			0	1414	0	1414			1	541
TCGA-OR-A5KP-01	TCGA-OR-A5KP	ACC	45	FEMALE	WHITE	Stage II		Adrenocortical carcinoma- Usual Type		2006		-16702	Alive	TUMOR FREE	2777			Distant Metastasis	Liver		1250	Complete Remission/Response			0	2777	0	2777	1	1250	1	1250
TCGA-OR-A5KQ-01	TCGA-OR-A5KQ	ACC	20	FEMALE	WHITE	Stage II		Adrenocortical carcinoma- Usual Type		2006		-7459	Alive	TUMOR FREE	2677							Complete Remission/Response			0	2677	0	2677	0	2677	0	2677
TCGA-OR-A5KS-01	TCGA-OR-A5KS	ACC	72	MALE	WHITE	Stage II		Adrenocortical carcinoma- Usual Type		2006		-26404	Alive	TUMOR FREE	2549							Complete Remission/Response			0	2549	0	2549	0	2549	0	2549
TCGA-OR-A5KT-01	TCGA-OR-A5KT	ACC	44	FEMALE	WHITE	Stage I		Adrenocortical carcinoma- Usual Type		2006		-16217	Alive	TUMOR FREE	2895			Distant Metastasis	Other, specify	Pancreas	2099	Complete Remission/Response			0	2895	0	2895	1	2099	1	2099
TCGA-OR-A5KU-01	TCGA-OR-A5KU	ACC	37	FEMALE	WHITE	Stage II		Adrenocortical carcinoma- Usual Type		2000		-13559	Alive	TUMOR FREE	4673							Complete Remission/Response			0	4673	0	4673	0	4673	0	4673
TCGA-OR-A5KV-01	TCGA-OR-A5KV	ACC	17	FEMALE	WHITE	Stage III		Adrenocortical carcinoma- Usual Type		2003		-6250	Alive	TUMOR FREE	3878			Distant Metastasis	Lung		1116	Complete Remission/Response			0	3878	0	3878	1	1116	1	1116
TCGA-OR-A5KW-01	TCGA-OR-A5KW	ACC	55	FEMALE	WHITE	Stage III		Adrenocortical carcinoma- Usual Type		2009		-20328	Alive	TUMOR FREE	2076							Complete Remission/Response			0	2076	0	2076	0	2076	0	2076
TCGA-OR-A5KX-01	TCGA-OR-A5KX	ACC	25	FEMALE	WHITE	Stage III		Adrenocortical carcinoma- Usual Type		2010		-9298	Alive	WITH TUMOR	1364			Distant Metastasis	Bone		62	Progressive Disease			0	1364	0	1364			1	62
TCGA-OR-A5KY-01	TCGA-OR-A5KY	ACC	23	FEMALE	WHITE	Stage IV		Adrenocortical carcinoma- Usual Type		2010		-8745	Dead	WITH TUMOR		391		Locoregional Recurrence	Peritoneal Surfaces		178	Progressive Disease			1	391	1	391			1	178
TCGA-OR-A5KZ-01	TCGA-OR-A5KZ	ACC	42	MALE	WHITE	Stage II		Adrenocortical carcinoma- Usual Type		2012		-15594	Dead	WITH TUMOR		125		Locoregional Recurrence	Other, specify	abdomen	36	Progressive Disease			1	125	1	125			1	36
TCGA-OR-A5L1-01	TCGA-OR-A5L1	ACC	37	FEMALE	WHITE	Stage II		Adrenocortical carcinoma- Usual Type		2000		-13840	Alive	WITH TUMOR	1781			Distant Metastasis	Bone		685	Complete Remission/Response			0	1781	0	1781	1	685	1	685
TCGA-OR-A5L2-01	TCGA-OR-A5L2	ACC	83	FEMALE	WHITE	Stage II		Adrenocortical carcinoma- Usual Type		2001		-30535	Dead	TUMOR FREE		1852						Complete Remission/Response			1	1852	0	1852	0	1852	0	1852
TCGA-OR-A5L3-01	TCGA-OR-A5L3	ACC	67	FEMALE	WHITE	Stage I		Adrenocortical carcinoma- Usual Type		2000		-24763	Alive	TUMOR FREE	4628							Complete Remission/Response			0	4628	0	4628	0	4628	0	4628
TCGA-OR-A5L4-01	TCGA-OR-A5L4	ACC	48	FEMALE	WHITE	Stage III		Adrenocortical carcinoma- Usual Type		2011		-17819	Alive	TUMOR FREE	967							Complete Remission/Response			0	967	0	967	0	967	0	967
TCGA-OR-A5L5-01	TCGA-OR-A5L5	ACC	77	FEMALE	WHITE	Stage I		Adrenocortical carcinoma- Usual Type		2010		-28270	Alive	TUMOR FREE	1317							Complete Remission/Response			0	1317	0	1317	0	1317	0	1317
TCGA-OR-A5L6-01	TCGA-OR-A5L6	ACC	60	MALE	WHITE	Stage II		Adrenocortical carcinoma- Usual Type		2011		-22057	Alive	TUMOR FREE	861							Complete Remission/Response			0	861	0	861	0	861	0	861
TCGA-OR-A5L8-01	TCGA-OR-A5L8	ACC	36	FEMALE	WHITE	Stage II		Adrenocortical carcinoma- Usual Type		2011		-13472	Alive	TUMOR FREE	885							Complete Remission/Response			0	885	0	885	0	885	0	885
TCGA-OR-A5L9-01	TCGA-OR-A5L9	ACC	53	FEMALE	WHITE	Stage II		Adrenocortical carcinoma- Usual Type		2011		-19526	Alive	TUMOR FREE	871							Complete Remission/Response			0	871	0	871	0	871	0	871
TCGA-OR-A5LA-01	TCGA-OR-A5LA	ACC	52	FEMALE	WHITE	Stage II		Adrenocortical carcinoma- Usual Type		2012		-19242	Alive	TUMOR FREE	719							Complete Remission/Response			0	719	0	719	0	719	0	719
TCGA-OR-A5LB-01	TCGA-OR-A5LB	ACC	59	MALE	WHITE	Stage IV		Adrenocortical carcinoma- Usual Type		2006		-21565	Dead	WITH TUMOR		1204		Distant Metastasis	Liver		611	Progressive Disease			1	1204	1	1204			1	611
TCGA-OR-A5LC-01	TCGA-OR-A5LC	ACC	71	FEMALE	WHITE	Stage IV		Adrenocortical carcinoma- Usual Type		2011		-26084	Dead	WITH TUMOR		159		Distant Metastasis	Lung		50	Progressive Disease			1	159	1	159			1	50
TCGA-OR-A5LD-01	TCGA-OR-A5LD	ACC	52	MALE	WHITE	Stage III		Adrenocortical carcinoma- Usual Type		1998		-19111	Dead	WITH TUMOR		1197		Distant Metastasis	Lung		444	[Unknown]			1	1197	1	1197			1	444
TCGA-OR-A5LE-01	TCGA-OR-A5LE	ACC	14	MALE	WHITE	Stage II		Adrenocortical carcinoma- Usual Type		1997		-5383	Dead	WITH TUMOR		662		Locoregional Recurrence	Peritoneal Surfaces		265	[Unknown]			1	662	1	662			1	265
TCGA-OR-A5LF-01	TCGA-OR-A5LF	ACC	74	FEMALE	WHITE	Stage III		Adrenocortical carcinoma- Usual Type		2002		-27179	Dead	TUMOR FREE		445						Complete Remission/Response			1	445	0	445	0	445	0	445
TCGA-OR-A5LG-01	TCGA-OR-A5LG	ACC	46	MALE	WHITE	Stage III		Adrenocortical carcinoma- Usual Type		2008		-16875	Alive	WITH TUMOR	1589			Distant Metastasis	Lung		1393	Complete Remission/Response			0	1589	0	1589	1	1393	1	1393
TCGA-OR-A5LH-01	TCGA-OR-A5LH	ACC	36	FEMALE	WHITE	Stage II		Adrenocortical carcinoma- Usual Type		2005		-13182	Dead	WITH TUMOR		2385						Progressive Disease			1	2385	1	2385			1	2385
TCGA-OR-A5LI-01	TCGA-OR-A5LI	ACC	42	FEMALE	WHITE	Stage IV		Adrenocortical carcinoma- Usual Type		1998		-15536	Dead	WITH TUMOR		436		Distant Metastasis	Bone		61	Progressive Disease			1	436	1	436			1	61
TCGA-OR-A5LJ-01	TCGA-OR-A5LJ	ACC	54	FEMALE	WHITE	Stage IV		Adrenocortical carcinoma- Usual Type		2005		-20069	Dead	WITH TUMOR		1105		Distant Metastasis	Lung		98	Progressive Disease			1	1105	1	1105			1	98
TCGA-OR-A5LK-01	TCGA-OR-A5LK	ACC	62	MALE	[Not Evaluated]	Stage II		Adrenocortical Carcinoma- Oncocytic Type		2007		-22919	Alive	TUMOR FREE	2740							Complete Remission/Response			0	2740	0	2740	0	2740	0	2740
TCGA-OR-A5LL-01	TCGA-OR-A5LL	ACC	75	FEMALE	[Not Evaluated]	Stage II		Adrenocortical carcinoma- Usual Type		2007		-27607	Dead	WITH TUMOR		1613		Distant Metastasis	Liver		213	Complete Remission/Response			1	1613	1	1613	1	213	1	213
TCGA-OR-A5LM-01	TCGA-OR-A5LM	ACC	23	MALE	[Not Evaluated]	Stage II		Adrenocortical carcinoma- Usual Type		2008		-8735	Alive	TUMOR FREE	1858							Complete Remission/Response			0	1858	0	1858	0	1858	0	1858
TCGA-OR-A5LN-01	TCGA-OR-A5LN	ACC	31	FEMALE	[Not Evaluated]	Stage II		Adrenocortical carcinoma- Usual Type		2008		-11414	Alive	TUMOR FREE	2342							Complete Remission/Response			0	2342	0	2342	0	2342	0	2342
TCGA-OR-A5LO-01	TCGA-OR-A5LO	ACC	61	FEMALE	[Not Evaluated]	Stage II		Adrenocortical carcinoma- Usual Type		2008		-22370	Dead	WITH TUMOR		2405		Distant Metastasis	Lung		153	Complete Remission/Response			1	2405	1	2405	1	153	1	153
TCGA-OR-A5LP-01	TCGA-OR-A5LP	ACC	37	FEMALE	[Not Evaluated]	Stage II		Adrenocortical carcinoma- Usual Type		2009		-13574	Alive	TUMOR FREE	1857							Complete Remission/Response			0	1857	0	1857	0	1857	0	1857
TCGA-OR-A5LR-01	TCGA-OR-A5LR	ACC	30	FEMALE	[Not Evaluated]	Stage II		Adrenocortical carcinoma- Usual Type		2011		-11261	Alive	TUMOR FREE	853							Complete Remission/Response			0	853	0	853	0	853	0	853
TCGA-OR-A5LS-01	TCGA-OR-A5LS	ACC	34	FEMALE	[Not Evaluated]	Stage II		Adrenocortical carcinoma- Usual Type		2011		-12663	Alive	TUMOR FREE	1096							Complete Remission/Response			0	1096	0	1096	0	1096	0	1096
TCGA-OR-A5LT-01	TCGA-OR-A5LT	ACC	57	MALE	[Not Evaluated]	Stage III		Adrenocortical carcinoma- Usual Type		2012		-21032	Alive	TUMOR FREE	549							Complete Remission/Response			0	549	0	549	0	549	0	549
TCGA-OU-A5PI-01	TCGA-OU-A5PI	ACC	53	FEMALE	WHITE	Stage IV		Adrenocortical carcinoma- Usual Type		2011		-19492	Alive	WITH TUMOR	1171			Distant Metastasis	Lung		351	Stable Disease			0	1171	0	1171			1	351
TCGA-P6-A5OF-01	TCGA-P6-A5OF	ACC	55	FEMALE	WHITE	Stage III		Adrenocortical carcinoma- Usual Type		2010		-20106	Dead	WITH TUMOR		207		Distant Metastasis	Lung		143	[Unknown]			1	207	1	207			1	143
TCGA-P6-A5OG-01	TCGA-P6-A5OG	ACC	45	FEMALE	WHITE	Stage IV		Adrenocortical carcinoma- Usual Type		2011		-16659	Dead	WITH TUMOR		383		Distant Metastasis	Lung		11	Complete Remission/Response			1	383	1	383			1	11
TCGA-P6-A5OH-01	TCGA-P6-A5OH	ACC	59	FEMALE	WHITE	Stage IV		Adrenocortical carcinoma- Usual Type		2010		-21627	Dead	WITH TUMOR		0									1	0	1	0			1	0
TCGA-PA-A5YG-01	TCGA-PA-A5YG	ACC	51	MALE	WHITE	Stage II		Adrenocortical carcinoma- Usual Type		2012		-18926	Alive	TUMOR FREE	756							Complete Remission/Response			0	756	0	756	0	756	0	756
TCGA-PK-A5H8-01	TCGA-PK-A5H8	ACC	42	MALE	WHITE	Stage II		Adrenocortical carcinoma- Usual Type		2004		-15373	Alive	TUMOR FREE	3623							Complete Remission/Response			0	3623	0	3623	0	3623	0	3623
TCGA-PK-A5H9-01	TCGA-PK-A5H9	ACC	27	FEMALE	ASIAN	Stage II		Adrenocortical carcinoma- Usual Type		2012		-10173	Alive	TUMOR FREE	616							Complete Remission/Response			0	616	0	616	0	616	0	616
TCGA-PK-A5HA-01	TCGA-PK-A5HA	ACC	63	MALE	[Unknown]	Stage I		Adrenocortical carcinoma- Usual Type		2011		-23345	Alive	TUMOR FREE	1201							Complete Remission/Response			0	1201	0	1201	0	1201	0	1201
TCGA-PK-A5HB-01	TCGA-PK-A5HB	ACC	63	MALE	[Unknown]			Adrenocortical carcinoma- Usual Type		2003		-23293	Alive	WITH TUMOR	1293			Distant Metastasis	Lung		213				0	1293	0	1293			1	213
TCGA-PK-A5HC-01	TCGA-PK-A5HC	ACC	44	FEMALE	ASIAN	Stage III		Adrenocortical carcinoma- Usual Type		2011		-16182	Alive	WITH TUMOR	679			Distant Metastasis	Lung		131	Complete Remission/Response			0	679	0	679	1	131	1	131
TCGA-2F-A9KO-01	TCGA-2F-A9KO	BLCA	63	MALE	WHITE	Stage IV		Muscle invasive urothelial carcinoma (pT2 or above)	High Grade	2008		-23323	Dead	WITH TUMOR		734		Distant Metastasis	Liver		651	Progressive Disease			1	734	1	734			1	651
TCGA-2F-A9KP-01	TCGA-2F-A9KP	BLCA	66	MALE	WHITE	Stage IV		Muscle invasive urothelial carcinoma (pT2 or above)	High Grade	2011		-24428	Dead	WITH TUMOR		364		Distant Metastasis	Liver		343	Progressive Disease			1	364	1	364			1	343
TCGA-2F-A9KQ-01	TCGA-2F-A9KQ	BLCA	69	MALE	WHITE	Stage III		Muscle invasive urothelial carcinoma (pT2 or above)	High Grade	2007		-25259	Alive	TUMOR FREE	2886							Complete Remission/Response			0	2886	0	2886	0	2886	0	2886
TCGA-2F-A9KR-01	TCGA-2F-A9KR	BLCA	59	FEMALE	[Not Evaluated]	Stage III		Muscle invasive urothelial carcinoma (pT2 or above)	High Grade	2000		-21848	Dead	WITH TUMOR		3183		Distant Metastasis	Lung		3086	Complete Remission/Response			1	3183	1	3183	1	3086	1	3086
TCGA-2F-A9KT-01	TCGA-2F-A9KT	BLCA	83	MALE	WHITE	Stage II		Muscle invasive urothelial carcinoma (pT2 or above)	High Grade	2006		-30520	Alive	TUMOR FREE	3314							Complete Remission/Response			0	3314	0	3314	0	3314	0	3314
TCGA-2F-A9KW-01	TCGA-2F-A9KW	BLCA	67	FEMALE	WHITE	Stage III		Muscle invasive urothelial carcinoma (pT2 or above)	High Grade	2013		-24703	Dead	WITH TUMOR		254		Distant Metastasis	Bone		85	Stable Disease			1	254	1	254			1	85
TCGA-4Z-AA7M-01	TCGA-4Z-AA7M	BLCA	65	MALE	WHITE	Stage III		Muscle invasive urothelial carcinoma (pT2 or above)	High Grade	2013		-23817	Alive	TUMOR FREE	495							Complete Remission/Response			0	495	0	495	0	495	0	495
TCGA-4Z-AA7N-01	TCGA-4Z-AA7N	BLCA	65	MALE	WHITE	Stage III		Muscle invasive urothelial carcinoma (pT2 or above)	High Grade	2010		-24090	Dead	TUMOR FREE		1367						Complete Remission/Response			1	1367	0	1367	0	1367	0	1367
TCGA-4Z-AA7O-01	TCGA-4Z-AA7O	BLCA	64	MALE	BLACK OR AFRICAN AMERICAN	Stage II		Muscle invasive urothelial carcinoma (pT2 or above)	High Grade	2013		-23645	Alive	TUMOR FREE	512							Complete Remission/Response			0	512	0	512	0	512	0	512
TCGA-4Z-AA7Q-01	TCGA-4Z-AA7Q	BLCA	79	MALE	WHITE	Stage III		Muscle invasive urothelial carcinoma (pT2 or above)	High Grade	2012		-28981	Dead	TUMOR FREE		510									1	510	0	510			0	510
TCGA-4Z-AA7R-01	TCGA-4Z-AA7R	BLCA	73	MALE	BLACK OR AFRICAN AMERICAN	Stage IV		Muscle invasive urothelial carcinoma (pT2 or above)	High Grade	2010		-26781	Dead	WITH TUMOR		522		Locoregional (Urothelial tumor event)	Lymph Node Only		353	Partial Remission/Response			1	522	1	522			1	353
TCGA-4Z-AA7S-01	TCGA-4Z-AA7S	BLCA	66	MALE	BLACK OR AFRICAN AMERICAN	Stage III		Muscle invasive urothelial carcinoma (pT2 or above)	High Grade	2010		-24111	Dead	TUMOR FREE		1064									1	1064	0	1064			0	1064
TCGA-4Z-AA7W-01	TCGA-4Z-AA7W	BLCA	55	MALE	WHITE	Stage II		Muscle invasive urothelial carcinoma (pT2 or above)	High Grade	2012		-20424	Alive	WITH TUMOR	840			Locoregional (Urothelial tumor event)	Other, specify	Rectum	760	Complete Remission/Response			0	840	0	840	1	760	1	760
TCGA-4Z-AA7Y-01	TCGA-4Z-AA7Y	BLCA	60	MALE	WHITE	Stage II		Muscle invasive urothelial carcinoma (pT2 or above)	High Grade	2010		-22056	Alive	TUMOR FREE	1522							Complete Remission/Response			0	1522	0	1522	0	1522	0	1522
TCGA-4Z-AA80-01	TCGA-4Z-AA80	BLCA	73	MALE	WHITE	Stage II		Muscle invasive urothelial carcinoma (pT2 or above)	High Grade	2012		-26873	Dead	TUMOR FREE		19									1	19	0	19			0	19
TCGA-4Z-AA81-01	TCGA-4Z-AA81	BLCA	80	MALE	WHITE	Stage II		Muscle invasive urothelial carcinoma (pT2 or above)	High Grade	2010		-29457	Dead	TUMOR FREE		1270						Complete Remission/Response			1	1270	0	1270	0	1270	0	1270
TCGA-4Z-AA82-01	TCGA-4Z-AA82	BLCA	59	MALE	BLACK OR AFRICAN AMERICAN	Stage IV		Muscle invasive urothelial carcinoma (pT2 or above)	High Grade	2010		-21893	Dead	WITH TUMOR		1556		Distant Metastasis	Bone		1150	Complete Remission/Response			1	1556	1	1556			1	1150
TCGA-4Z-AA83-01	TCGA-4Z-AA83	BLCA	52	MALE	WHITE	Stage II		Muscle invasive urothelial carcinoma (pT2 or above)	High Grade	2009		-19280	Alive	TUMOR FREE	2024							Complete Remission/Response			0	2024	0	2024	0	2024	0	2024
TCGA-4Z-AA84-01	TCGA-4Z-AA84	BLCA	61	MALE	WHITE	Stage IV		Muscle invasive urothelial carcinoma (pT2 or above)	High Grade	2008		-22397	Alive	WITH TUMOR	460							Progressive Disease			0	460	0	460			0	460
TCGA-4Z-AA86-01	TCGA-4Z-AA86	BLCA	66	MALE	BLACK OR AFRICAN AMERICAN	Stage IV		Muscle invasive urothelial carcinoma (pT2 or above)	High Grade	2009		-24465	Dead	WITH TUMOR		311		Locoregional (Urothelial tumor event)	Other, specify	Pelvis	136	Complete Remission/Response			1	311	1	311			1	136
TCGA-4Z-AA87-01	TCGA-4Z-AA87	BLCA	72	MALE	BLACK OR AFRICAN AMERICAN	Stage III		Muscle invasive urothelial carcinoma (pT2 or above)	High Grade	2010		-26430	Alive	WITH TUMOR	1454			Distant Metastasis	Bone		221	[Unknown]			0	1454	0	1454			1	221
TCGA-4Z-AA89-01	TCGA-4Z-AA89	BLCA	60	MALE	WHITE	Stage IV		Muscle invasive urothelial carcinoma (pT2 or above)	High Grade	2011		-22271	Alive	WITH TUMOR	1029			New Primary Tumor	Lung		648	Complete Remission/Response			0	1029	0	1029			1	648
TCGA-5N-A9KI-01	TCGA-5N-A9KI	BLCA	76	FEMALE	WHITE	Stage III		Muscle invasive urothelial carcinoma (pT2 or above)	High Grade	2011		-27777	Dead	TUMOR FREE		76						Complete Remission/Response			1	76	0	76	0	76	0	76
TCGA-5N-A9KM-01	TCGA-5N-A9KM	BLCA	73	FEMALE	WHITE	Stage III		Muscle invasive urothelial carcinoma (pT2 or above)	High Grade	2012		-26906	Dead	WITH TUMOR		530					276	Complete Remission/Response			1	530	1	530	1	276	1	276
TCGA-BL-A0C8-01	TCGA-BL-A0C8	BLCA	73	MALE	WHITE	Stage I			High Grade	2009		-26819	Alive		1219			Locoregional (Urothelial tumor event)	Bladder		630	Complete Remission/Response			0	1219	0	1219	1	630	1	630
TCGA-BL-A13I-01	TCGA-BL-A13I	BLCA	57	FEMALE	WHITE	Stage III		Muscle invasive urothelial carcinoma (pT2 or above)	High Grade	2010		-20885	Dead	WITH TUMOR		223		Metastatic			216	Progressive Disease			1	223	1	223			1	216
TCGA-BL-A13J-01	TCGA-BL-A13J	BLCA	65	MALE	WHITE	Stage IV		Muscle invasive urothelial carcinoma (pT2 or above)	High Grade	2010		-23927	Dead	WITH TUMOR		81						Stable Disease			1	81	1	81			1	81
TCGA-BL-A13J-11	TCGA-BL-A13J	BLCA	65	MALE	WHITE	Stage IV		Muscle invasive urothelial carcinoma (pT2 or above)	High Grade	2010		-23927	Dead	WITH TUMOR		81						Stable Disease			1	81	1	81			1	81
TCGA-BL-A3JM-01	TCGA-BL-A3JM	BLCA	62	MALE	WHITE	Stage III		Muscle invasive urothelial carcinoma (pT2 or above)	High Grade	2010		-23000	Dead	WITH TUMOR		205		Metastatic	Bone		111	Progressive Disease			1	205	1	205			1	111
TCGA-BL-A5ZZ-01	TCGA-BL-A5ZZ	BLCA	80	FEMALE	WHITE	Stage III		Muscle invasive urothelial carcinoma (pT2 or above)	High Grade	2012		-29247	Alive	WITH TUMOR	377			Distant Metastasis	Lung		242	Complete Remission/Response			0	377	0	377	1	242	1	242
TCGA-BT-A0S7-01	TCGA-BT-A0S7	BLCA	75	MALE	WHITE	Stage III		Muscle invasive urothelial carcinoma (pT2 or above)	High Grade	2007		-27533	Dead	WITH TUMOR		200						Progressive Disease			1	200	1	200			1	200
TCGA-BT-A0YX-01	TCGA-BT-A0YX	BLCA	70	FEMALE	WHITE	Stage III		Muscle invasive urothelial carcinoma (pT2 or above)	High Grade	2009		-25570	Dead	WITH TUMOR		400		Metastatic	Other, specify	lower abdominal wall and right pelvis	326	Progressive Disease			1	400	1	400			1	326
TCGA-BT-A20J-01	TCGA-BT-A20J	BLCA	75	MALE	WHITE	Stage II		Muscle invasive urothelial carcinoma (pT2 or above)	High Grade	1999		-27646	Dead	WITH TUMOR		579		Distant Metastasis	Other, specify	Adrenal	254	Progressive Disease			1	579	1	579			1	254
TCGA-BT-A20J-11	TCGA-BT-A20J	BLCA	75	MALE	WHITE	Stage II		Muscle invasive urothelial carcinoma (pT2 or above)	High Grade	1999		-27646	Dead	WITH TUMOR		579		Distant Metastasis	Other, specify	Adrenal	254	Progressive Disease			1	579	1	579			1	254
TCGA-BT-A20N-01	TCGA-BT-A20N	BLCA	72	MALE		Stage III		Muscle invasive urothelial carcinoma (pT2 or above)	High Grade	2003		-26456	Dead	WITH TUMOR		795						Progressive Disease			1	795	1	795			1	795
TCGA-BT-A20N-11	TCGA-BT-A20N	BLCA	72	MALE		Stage III		Muscle invasive urothelial carcinoma (pT2 or above)	High Grade	2003		-26456	Dead	WITH TUMOR		795						Progressive Disease			1	795	1	795			1	795
TCGA-BT-A20O-01	TCGA-BT-A20O	BLCA	75	MALE	WHITE	Stage III		Muscle invasive urothelial carcinoma (pT2 or above)	High Grade	2003		-27534	Dead	WITH TUMOR		370		Locoregional (Urothelial tumor event)	Lymph Node Only		315	Progressive Disease			1	370	1	370			1	315
TCGA-BT-A20P-01	TCGA-BT-A20P	BLCA	81	FEMALE	WHITE	Stage III		Muscle invasive urothelial carcinoma (pT2 or above)	High Grade	2005		-29634	Dead			544									1	544		544			0	544
TCGA-BT-A20P-11	TCGA-BT-A20P	BLCA	81	FEMALE	WHITE	Stage III		Muscle invasive urothelial carcinoma (pT2 or above)	High Grade	2005		-29634	Dead			544									1	544		544			0	544
TCGA-BT-A20Q-01	TCGA-BT-A20Q	BLCA	73	MALE	WHITE	Stage IV		Muscle invasive urothelial carcinoma (pT2 or above)	High Grade	2006		-26778	Dead	WITH TUMOR		593						Progressive Disease			1	593	1	593			1	593
TCGA-BT-A20Q-11	TCGA-BT-A20Q	BLCA	73	MALE	WHITE	Stage IV		Muscle invasive urothelial carcinoma (pT2 or above)	High Grade	2006		-26778	Dead	WITH TUMOR		593						Progressive Disease			1	593	1	593			1	593
TCGA-BT-A20R-01	TCGA-BT-A20R	BLCA	79	FEMALE	WHITE	Stage IV		Muscle invasive urothelial carcinoma (pT2 or above)	High Grade	2006		-28987	Dead			154									1	154		154			0	154
TCGA-BT-A20R-11	TCGA-BT-A20R	BLCA	79	FEMALE	WHITE	Stage IV		Muscle invasive urothelial carcinoma (pT2 or above)	High Grade	2006		-28987	Dead			154									1	154		154			0	154
TCGA-BT-A20T-01	TCGA-BT-A20T	BLCA	63	MALE	WHITE	Stage IV		Muscle invasive urothelial carcinoma (pT2 or above)	High Grade	2007		-23220	Dead	WITH TUMOR		453		Distant Metastasis	Liver		314	Progressive Disease			1	453	1	453			1	314
TCGA-BT-A20U-01	TCGA-BT-A20U	BLCA	70	FEMALE	WHITE	Stage III		Muscle invasive urothelial carcinoma (pT2 or above)	High Grade	2008		-25761	Dead	TUMOR FREE		455						Complete Remission/Response			1	455	0	455	0	455	0	455
TCGA-BT-A20U-11	TCGA-BT-A20U	BLCA	70	FEMALE	WHITE	Stage III		Muscle invasive urothelial carcinoma (pT2 or above)	High Grade	2008		-25761	Dead	TUMOR FREE		455						Complete Remission/Response			1	455	0	455	0	455	0	455
TCGA-BT-A20V-01	TCGA-BT-A20V	BLCA	59	FEMALE	BLACK OR AFRICAN AMERICAN	Stage IV		Muscle invasive urothelial carcinoma (pT2 or above)	High Grade	2008		-21551	Dead			154									1	154		154			0	154
TCGA-BT-A20V-11	TCGA-BT-A20V	BLCA	59	FEMALE	BLACK OR AFRICAN AMERICAN	Stage IV		Muscle invasive urothelial carcinoma (pT2 or above)	High Grade	2008		-21551	Dead			154									1	154		154			0	154
TCGA-BT-A20W-01	TCGA-BT-A20W	BLCA	71	MALE	WHITE	Stage II		Muscle invasive urothelial carcinoma (pT2 or above)	High Grade	2009		-26078	Dead	TUMOR FREE		254						Complete Remission/Response			1	254	0	254	0	254	0	254
TCGA-BT-A20W-11	TCGA-BT-A20W	BLCA	71	MALE	WHITE	Stage II		Muscle invasive urothelial carcinoma (pT2 or above)	High Grade	2009		-26078	Dead	TUMOR FREE		254						Complete Remission/Response			1	254	0	254	0	254	0	254
TCGA-BT-A20X-01	TCGA-BT-A20X	BLCA	56	MALE	WHITE	Stage IV		Muscle invasive urothelial carcinoma (pT2 or above)	High Grade	2009		-20519	Dead	WITH TUMOR		251						Progressive Disease			1	251	1	251			1	251
TCGA-BT-A20X-11	TCGA-BT-A20X	BLCA	56	MALE	WHITE	Stage IV		Muscle invasive urothelial carcinoma (pT2 or above)	High Grade	2009		-20519	Dead	WITH TUMOR		251						Progressive Disease			1	251	1	251			1	251
TCGA-BT-A2LA-01	TCGA-BT-A2LA	BLCA	54	MALE	WHITE	Stage III		Muscle invasive urothelial carcinoma (pT2 or above)	High Grade	2010		-20032	Alive	TUMOR FREE	522							Complete Remission/Response			0	522	0	522	0	522	0	522
TCGA-BT-A2LA-11	TCGA-BT-A2LA	BLCA	54	MALE	WHITE	Stage III		Muscle invasive urothelial carcinoma (pT2 or above)	High Grade	2010		-20032	Alive	TUMOR FREE	522							Complete Remission/Response			0	522	0	522	0	522	0	522
TCGA-BT-A2LB-01	TCGA-BT-A2LB	BLCA	73	FEMALE	WHITE	Stage III		Muscle invasive urothelial carcinoma (pT2 or above)	High Grade	2010		-26846	Dead	TUMOR FREE		492						Complete Remission/Response			1	492	0	492	0	492	0	492
TCGA-BT-A2LB-11	TCGA-BT-A2LB	BLCA	73	FEMALE	WHITE	Stage III		Muscle invasive urothelial carcinoma (pT2 or above)	High Grade	2010		-26846	Dead	TUMOR FREE		492						Complete Remission/Response			1	492	0	492	0	492	0	492
TCGA-BT-A2LD-01	TCGA-BT-A2LD	BLCA	78	FEMALE	WHITE	Stage IV		Muscle invasive urothelial carcinoma (pT2 or above)	High Grade	2011		-28673	Dead	WITH TUMOR		623		Distant Metastasis	Other, specify	brain and spinal cord	555	Progressive Disease			1	623	1	623			1	555
TCGA-BT-A3PH-01	TCGA-BT-A3PH	BLCA	76	MALE	WHITE	Stage IV		Muscle invasive urothelial carcinoma (pT2 or above)	High Grade	2010		-28030	Dead	WITH TUMOR		142						Progressive Disease			1	142	1	142			1	142
TCGA-BT-A3PJ-01	TCGA-BT-A3PJ	BLCA	76	MALE	WHITE	Stage III		Muscle invasive urothelial carcinoma (pT2 or above)	High Grade	2011		-27821	Alive	TUMOR FREE	789							Complete Remission/Response			0	789	0	789	0	789	0	789
TCGA-BT-A3PK-01	TCGA-BT-A3PK	BLCA	80	MALE	WHITE	Stage II		Muscle invasive urothelial carcinoma (pT2 or above)	High Grade	2011		-29314	Dead	WITH TUMOR		303						Stable Disease			1	303	1	303			1	303
TCGA-BT-A42B-01	TCGA-BT-A42B	BLCA	59	MALE	WHITE	Stage IV		Muscle invasive urothelial carcinoma (pT2 or above)	High Grade	2011		-21788	Dead	WITH TUMOR		534						Partial Remission/Response			1	534	1	534			1	534
TCGA-BT-A42C-01	TCGA-BT-A42C	BLCA	64	MALE	WHITE	Stage II		Muscle invasive urothelial carcinoma (pT2 or above)	High Grade	2011		-23584	Alive	TUMOR FREE	873							Complete Remission/Response			0	873	0	873	0	873	0	873
TCGA-BT-A42E-01	TCGA-BT-A42E	BLCA	74	MALE	WHITE	Stage III		Muscle invasive urothelial carcinoma (pT2 or above)	High Grade	2012		-27045	Alive	TUMOR FREE	1108							Complete Remission/Response			0	1108	0	1108	0	1108	0	1108
TCGA-BT-A42F-01	TCGA-BT-A42F	BLCA	64	MALE	WHITE	Stage IV		Muscle invasive urothelial carcinoma (pT2 or above)	High Grade	2011		-23713	Alive	TUMOR FREE	864							Complete Remission/Response			0	864	0	864			0	864
TCGA-C4-A0EZ-01	TCGA-C4-A0EZ	BLCA	69	FEMALE		Stage IV		Muscle invasive urothelial carcinoma (pT2 or above)	High Grade	2006		-25202	Dead	WITH TUMOR		273						Partial Remission/Response			1	273	1	273			1	273	Redacted
TCGA-C4-A0F0-01	TCGA-C4-A0F0	BLCA	60	MALE		Stage II		Muscle invasive urothelial carcinoma (pT2 or above)	High Grade	2007		-22068	Alive	TUMOR FREE	59										0	59	0	59			0	59
TCGA-C4-A0F1-01	TCGA-C4-A0F1	BLCA	71	MALE		Stage III		Muscle invasive urothelial carcinoma (pT2 or above)	High Grade	2006		-26178	Alive	TUMOR FREE	89										0	89	0	89			0	89	Redacted
TCGA-C4-A0F6-01	TCGA-C4-A0F6	BLCA	82	FEMALE		Stage III		Muscle invasive urothelial carcinoma (pT2 or above)	High Grade	2008		-29951	Alive	TUMOR FREE	700										0	700	0	700			0	700
TCGA-C4-A0F7-01	TCGA-C4-A0F7	BLCA	77	MALE		Stage IV		Muscle invasive urothelial carcinoma (pT2 or above)	High Grade	2008		-28428	Dead	WITH TUMOR		62									1	62	1	62			1	62	Redacted
TCGA-CF-A1HR-01	TCGA-CF-A1HR	BLCA	62	MALE	ASIAN	Stage III		Muscle invasive urothelial carcinoma (pT2 or above)	High Grade	2010		-22777	Alive	WITH TUMOR	389			Distant Metastasis	Liver		294	Complete Remission/Response			0	389	0	389	1	294	1	294
TCGA-CF-A1HS-01	TCGA-CF-A1HS	BLCA	75	FEMALE	ASIAN	Stage III		Muscle invasive urothelial carcinoma (pT2 or above)	High Grade	2010		-27565	Alive	WITH TUMOR	382			Distant Metastasis	Other, specify	Pelvis	133	Complete Remission/Response			0	382	0	382	1	133	1	133
TCGA-CF-A27C-01	TCGA-CF-A27C	BLCA	52	MALE	ASIAN	Stage III		Muscle invasive urothelial carcinoma (pT2 or above)	High Grade	2011		-19270	Alive	TUMOR FREE	425							Complete Remission/Response			0	425	0	425	0	425	0	425
TCGA-CF-A3MF-01	TCGA-CF-A3MF	BLCA	34	MALE	ASIAN	Stage III		Muscle invasive urothelial carcinoma (pT2 or above)	Low Grade	2011		-12557	Alive	TUMOR FREE	383							Complete Remission/Response			0	383	0	383	0	383	0	383
TCGA-CF-A3MG-01	TCGA-CF-A3MG	BLCA	48	MALE	ASIAN	Stage II		Muscle invasive urothelial carcinoma (pT2 or above)	Low Grade	2011		-17600	Alive	TUMOR FREE	369							Complete Remission/Response			0	369	0	369	0	369	0	369
TCGA-CF-A3MH-01	TCGA-CF-A3MH	BLCA	75	MALE	ASIAN	Stage II		Muscle invasive urothelial carcinoma (pT2 or above)	Low Grade	2011		-27458	Alive	TUMOR FREE	398							Complete Remission/Response			0	398	0	398	0	398	0	398
TCGA-CF-A3MI-01	TCGA-CF-A3MI	BLCA	62	MALE	ASIAN	Stage II		Muscle invasive urothelial carcinoma (pT2 or above)	Low Grade	2011		-22716	Alive	TUMOR FREE	370							Complete Remission/Response			0	370	0	370	0	370	0	370
TCGA-CF-A47S-01	TCGA-CF-A47S	BLCA	41	MALE	ASIAN	Stage II		Muscle invasive urothelial carcinoma (pT2 or above)	Low Grade	2011		-15225	Alive	TUMOR FREE	333							Complete Remission/Response			0	333	0	333	0	333	0	333
TCGA-CF-A47T-01	TCGA-CF-A47T	BLCA	58	FEMALE	ASIAN	Stage II		Muscle invasive urothelial carcinoma (pT2 or above)	Low Grade	2011		-21347	Dead	WITH TUMOR		385		Distant Metastasis	Bone		139	Complete Remission/Response			1	385	1	385	1	139	1	139
TCGA-CF-A47V-01	TCGA-CF-A47V	BLCA	52	MALE	ASIAN	Stage II		Muscle invasive urothelial carcinoma (pT2 or above)	High Grade	2012		-19265	Alive	TUMOR FREE	379							Complete Remission/Response			0	379	0	379	0	379	0	379
TCGA-CF-A47W-01	TCGA-CF-A47W	BLCA	42	MALE	ASIAN	Stage II		Muscle invasive urothelial carcinoma (pT2 or above)	Low Grade	2012		-15497	Alive	TUMOR FREE	368							Complete Remission/Response			0	368	0	368	0	368	0	368
TCGA-CF-A47X-01	TCGA-CF-A47X	BLCA	60	MALE	ASIAN	Stage II		Muscle invasive urothelial carcinoma (pT2 or above)	Low Grade	2012		-22200	Alive	TUMOR FREE	384							Complete Remission/Response			0	384	0	384	0	384	0	384
TCGA-CF-A47Y-01	TCGA-CF-A47Y	BLCA	55	MALE	ASIAN	Stage II		Muscle invasive urothelial carcinoma (pT2 or above)	Low Grade	2012		-20432	Alive	TUMOR FREE	373							Complete Remission/Response			0	373	0	373	0	373	0	373
TCGA-CF-A5U8-01	TCGA-CF-A5U8	BLCA	59	MALE	ASIAN	Stage II		Muscle invasive urothelial carcinoma (pT2 or above)	Low Grade	2012		-21734	Alive	TUMOR FREE	399							Complete Remission/Response			0	399	0	399	0	399	0	399
TCGA-CF-A5UA-01	TCGA-CF-A5UA	BLCA	67	MALE	ASIAN	Stage II		Muscle invasive urothelial carcinoma (pT2 or above)	Low Grade	2012		-24625	Alive	TUMOR FREE	365							Complete Remission/Response			0	365	0	365	0	365	0	365
TCGA-CF-A7I0-01	TCGA-CF-A7I0	BLCA	54	MALE	ASIAN	Stage II		Muscle invasive urothelial carcinoma (pT2 or above)	Low Grade	2013		-20059	Alive	TUMOR FREE	368							Complete Remission/Response			0	368	0	368	0	368	0	368
TCGA-CF-A8HX-01	TCGA-CF-A8HX	BLCA	55	FEMALE	ASIAN	Stage II		Muscle invasive urothelial carcinoma (pT2 or above)	High Grade	2013		-20259	Alive	TUMOR FREE	345							Complete Remission/Response			0	345	0	345	0	345	0	345
TCGA-CF-A8HY-01	TCGA-CF-A8HY	BLCA	59	MALE	ASIAN	Stage II		Muscle invasive urothelial carcinoma (pT2 or above)	High Grade	2013		-21636	Alive	TUMOR FREE	345							Complete Remission/Response			0	345	0	345	0	345	0	345
TCGA-CF-A9FF-01	TCGA-CF-A9FF	BLCA	52	MALE	ASIAN	Stage II		Muscle invasive urothelial carcinoma (pT2 or above)	High Grade	2013		-19195	Alive	TUMOR FREE	361							Complete Remission/Response			0	361	0	361	0	361	0	361
TCGA-CF-A9FH-01	TCGA-CF-A9FH	BLCA	85	MALE	ASIAN	Stage II		Muscle invasive urothelial carcinoma (pT2 or above)	Low Grade	2013		-31236	Alive	TUMOR FREE	-64							Complete Remission/Response			0	0	0	0	0	0	0	0
TCGA-CF-A9FL-01	TCGA-CF-A9FL	BLCA	85	MALE	ASIAN	Stage III		Muscle invasive urothelial carcinoma (pT2 or above)	High Grade	2013		-31099	Dead	WITH TUMOR		565		Locoregional (Urothelial tumor event)			322	Complete Remission/Response			1	565	1	565	1	322	1	322
TCGA-CF-A9FM-01	TCGA-CF-A9FM	BLCA	50	MALE	ASIAN	Stage I			High Grade	2013		-18445	Alive	TUMOR FREE	398							Complete Remission/Response			0	398	0	398	0	398	0	398
TCGA-CU-A0YN-01	TCGA-CU-A0YN	BLCA	60	MALE	WHITE	Stage III		Muscle invasive urothelial carcinoma (pT2 or above)	High Grade	2005		-21927	Dead			393									1	393		393			0	393
TCGA-CU-A0YN-11	TCGA-CU-A0YN	BLCA	60	MALE	WHITE	Stage III		Muscle invasive urothelial carcinoma (pT2 or above)	High Grade	2005		-21927	Dead			393									1	393		393			0	393
TCGA-CU-A0YO-01	TCGA-CU-A0YO	BLCA	84	MALE	WHITE	Stage IV		Muscle invasive urothelial carcinoma (pT2 or above)	High Grade	2009		-30817	Dead	WITH TUMOR		149		Metastatic	Other, specify	peritoneum	118	Complete Remission/Response			1	149	1	149			1	118
TCGA-CU-A0YR-01	TCGA-CU-A0YR	BLCA	83	MALE	WHITE	Stage IV		Muscle invasive urothelial carcinoma (pT2 or above)	High Grade	2010		-30674	Dead	WITH TUMOR		460		Metastatic	Lymph Node Only		219	Complete Remission/Response			1	460	1	460			1	219
TCGA-CU-A0YR-11	TCGA-CU-A0YR	BLCA	83	MALE	WHITE	Stage IV		Muscle invasive urothelial carcinoma (pT2 or above)	High Grade	2010		-30674	Dead	WITH TUMOR		460		Metastatic	Lymph Node Only		219	Complete Remission/Response			1	460	1	460			1	219
TCGA-CU-A3KJ-01	TCGA-CU-A3KJ	BLCA	75	MALE	WHITE	Stage III		Muscle invasive urothelial carcinoma (pT2 or above)	High Grade	2011		-27692	Alive	WITH TUMOR	562			Distant Metastasis	Lung		166	Progressive Disease			0	562	0	562			1	166
TCGA-CU-A3QU-01	TCGA-CU-A3QU	BLCA	58	MALE	WHITE	Stage IV		Muscle invasive urothelial carcinoma (pT2 or above)	High Grade	2011		-21233	Alive	TUMOR FREE	158							Complete Remission/Response			0	158	0	158			0	158
TCGA-CU-A3YL-01	TCGA-CU-A3YL	BLCA	67	MALE	WHITE	Stage III		Muscle invasive urothelial carcinoma (pT2 or above)	High Grade	2011		-24524	Alive	TUMOR FREE	906			Distant Metastasis	Lung		370	Complete Remission/Response			0	906	0	906	1	370	1	370
TCGA-CU-A5W6-01	TCGA-CU-A5W6	BLCA	70	MALE	WHITE	Stage III		Muscle invasive urothelial carcinoma (pT2 or above)	High Grade	2012		-25706	Dead	TUMOR FREE		56						Complete Remission/Response			1	56	0	56	0	56	0	56
TCGA-CU-A72E-01	TCGA-CU-A72E	BLCA	76	MALE	WHITE	Stage IV		Muscle invasive urothelial carcinoma (pT2 or above)	High Grade	2013		-27963	Dead	WITH TUMOR		413		New Primary Tumor	Lymph Node Only		256	Partial Remission/Response			1	413	1	413			1	256
TCGA-DK-A1A3-01	TCGA-DK-A1A3	BLCA	60	MALE	WHITE	Stage IV		Muscle invasive urothelial carcinoma (pT2 or above)	High Grade	2010		-22235	Dead	WITH TUMOR		665									1	665	1	665			1	665
TCGA-DK-A1A5-01	TCGA-DK-A1A5	BLCA	79	MALE	WHITE	Stage II		Muscle invasive urothelial carcinoma (pT2 or above)	High Grade	2010		-29111	Dead	TUMOR FREE		65						Complete Remission/Response			1	65	0	65	0	65	0	65
TCGA-DK-A1A6-06	TCGA-DK-A1A6	BLCA	53	MALE	WHITE	Stage IV		Muscle invasive urothelial carcinoma (pT2 or above)	High Grade	2008		-19554	Alive	TUMOR FREE	2020							Complete Remission/Response			0	2020	0	2020			0	2020
TCGA-DK-A1A6-01	TCGA-DK-A1A6	BLCA	53	MALE	WHITE	Stage IV		Muscle invasive urothelial carcinoma (pT2 or above)	High Grade	2008		-19554	Alive	TUMOR FREE	2020							Complete Remission/Response			0	2020	0	2020			0	2020
TCGA-DK-A1A7-01	TCGA-DK-A1A7	BLCA	67	FEMALE	WHITE	Stage IV		Muscle invasive urothelial carcinoma (pT2 or above)	High Grade	2010		-24499	Alive	WITH TUMOR	560			Metastatic	Lung		112				0	560	0	560			1	112
TCGA-DK-A1AA-01	TCGA-DK-A1AA	BLCA	57	MALE	WHITE	Stage III		Muscle invasive urothelial carcinoma (pT2 or above)	High Grade	2010		-21093	Alive	TUMOR FREE	578							Complete Remission/Response			0	578	0	578	0	578	0	578
TCGA-DK-A1AB-01	TCGA-DK-A1AB	BLCA	74	FEMALE	WHITE	Stage IV		Muscle invasive urothelial carcinoma (pT2 or above)	High Grade	2010		-27126	Dead			508		Metastatic	Lung		364	Progressive Disease			1	508		508			1	364
TCGA-DK-A1AC-01	TCGA-DK-A1AC	BLCA	72	MALE	WHITE	Stage III		Muscle invasive urothelial carcinoma (pT2 or above)	High Grade	2000		-26307	Alive	TUMOR FREE	3981							Complete Remission/Response			0	3981	0	3981	0	3981	0	3981
TCGA-DK-A1AD-01	TCGA-DK-A1AD	BLCA	69	MALE	WHITE	Stage IV		Muscle invasive urothelial carcinoma (pT2 or above)	High Grade	2002		-25317	Alive	TUMOR FREE	3420										0	3420	0	3420			0	3420
TCGA-DK-A1AE-01	TCGA-DK-A1AE	BLCA	84	MALE	WHITE	Stage III		Muscle invasive urothelial carcinoma (pT2 or above)	High Grade	2010		-30707	Alive	WITH TUMOR	491			Metastatic	Bone		211	Progressive Disease			0	491	0	491			1	211
TCGA-DK-A1AF-01	TCGA-DK-A1AF	BLCA	84	FEMALE	WHITE	Stage IV		Muscle invasive urothelial carcinoma (pT2 or above)	High Grade	2010		-30914	Alive	TUMOR FREE	536			Metastatic	Lymph Node Only		283	Progressive Disease			0	536	0	536			1	283
TCGA-DK-A1AG-01	TCGA-DK-A1AG	BLCA	65	MALE	WHITE	Stage III		Muscle invasive urothelial carcinoma (pT2 or above)	High Grade	2010		-24095	Alive	TUMOR FREE	475							Complete Remission/Response			0	475	0	475	0	475	0	475
TCGA-DK-A2HX-01	TCGA-DK-A2HX	BLCA	80	FEMALE	WHITE	Stage IV		Muscle invasive urothelial carcinoma (pT2 or above)	High Grade	2010		-29332	Dead	TUMOR FREE		1420									1	1420	0	1420			0	1420
TCGA-DK-A2I1-01	TCGA-DK-A2I1	BLCA	73	FEMALE	WHITE	Stage II		Muscle invasive urothelial carcinoma (pT2 or above)	High Grade	2010		-26726	Alive	TUMOR FREE	546							Complete Remission/Response			0	546	0	546	0	546	0	546
TCGA-DK-A2I2-01	TCGA-DK-A2I2	BLCA	63	FEMALE	WHITE	Stage IV		Muscle invasive urothelial carcinoma (pT2 or above)	High Grade	2010		-23116	Dead	WITH TUMOR		237		Distant Metastasis	Liver		163	Complete Remission/Response			1	237	1	237			1	163
TCGA-DK-A2I4-01	TCGA-DK-A2I4	BLCA	79	MALE	WHITE	Stage III		Muscle invasive urothelial carcinoma (pT2 or above)	High Grade	2001		-29037	Alive	TUMOR FREE	4343							Complete Remission/Response			0	4343	0	4343	0	4343	0	4343
TCGA-DK-A2I6-01	TCGA-DK-A2I6	BLCA	81	MALE	WHITE	Stage IV		Muscle invasive urothelial carcinoma (pT2 or above)	High Grade	2005		-29789	Alive	TUMOR FREE	2656							Complete Remission/Response			0	2656	0	2656			0	2656
TCGA-DK-A3IK-01	TCGA-DK-A3IK	BLCA	87	MALE	WHITE	Stage IV		Muscle invasive urothelial carcinoma (pT2 or above)	High Grade	2011		-32076	Dead	TUMOR FREE		146						Complete Remission/Response			1	146	0	146			0	146
TCGA-DK-A3IL-01	TCGA-DK-A3IL	BLCA	79	FEMALE	WHITE	Stage IV		Muscle invasive urothelial carcinoma (pT2 or above)	High Grade	2011		-29047	Dead	TUMOR FREE		413						Complete Remission/Response			1	413	0	413			0	413
TCGA-DK-A3IM-01	TCGA-DK-A3IM	BLCA	76	MALE	WHITE	Stage III		Muscle invasive urothelial carcinoma (pT2 or above)	High Grade	2011		-28106	Dead	WITH TUMOR		248		Locoregional (Urothelial tumor event)	Lymph Node Only		201	Complete Remission/Response			1	248	1	248	1	201	1	201
TCGA-DK-A3IN-01	TCGA-DK-A3IN	BLCA	72	MALE	WHITE	Stage III		Muscle invasive urothelial carcinoma (pT2 or above)	High Grade	2011		-26562	Dead	TUMOR FREE		250						Complete Remission/Response			1	250	0	250	0	250	0	250
TCGA-DK-A3IQ-01	TCGA-DK-A3IQ	BLCA	74	MALE	WHITE	Stage III		Muscle invasive urothelial carcinoma (pT2 or above)	High Grade	2011		-27194	Dead	WITH TUMOR		539		Locoregional (Urothelial tumor event)	Lymph Node Only		250	Complete Remission/Response			1	539	1	539	1	250	1	250
TCGA-DK-A3IS-01	TCGA-DK-A3IS	BLCA	68	MALE	WHITE	Stage II		Muscle invasive urothelial carcinoma (pT2 or above)	High Grade	2008		-25098	Alive	TUMOR FREE	1529							Complete Remission/Response			0	1529	0	1529	0	1529	0	1529
TCGA-DK-A3IT-01	TCGA-DK-A3IT	BLCA	62	MALE	WHITE	Stage III		Muscle invasive urothelial carcinoma (pT2 or above)	High Grade	2011		-22786	Alive	TUMOR FREE	648							Complete Remission/Response			0	648	0	648	0	648	0	648
TCGA-DK-A3IU-01	TCGA-DK-A3IU	BLCA	58	MALE	WHITE	Stage II		Muscle invasive urothelial carcinoma (pT2 or above)	High Grade	2011		-21369	Dead	WITH TUMOR		706		Distant Metastasis	Lung		462	Complete Remission/Response			1	706	1	706	1	462	1	462
TCGA-DK-A3IV-01	TCGA-DK-A3IV	BLCA	60	MALE	WHITE	Stage II		Muscle invasive urothelial carcinoma (pT2 or above)	High Grade	2011		-22237	Dead	WITH TUMOR		294		Locoregional (Urothelial tumor event)	Lymph Node Only		212	Stable Disease			1	294	1	294			1	212
TCGA-DK-A3WW-01	TCGA-DK-A3WW	BLCA	57	MALE	WHITE	Stage III		Muscle invasive urothelial carcinoma (pT2 or above)	High Grade	2011		-20909	Alive	TUMOR FREE	633							Complete Remission/Response			0	633	0	633	0	633	0	633
TCGA-DK-A3WX-01	TCGA-DK-A3WX	BLCA	67	FEMALE	WHITE	Stage III		Muscle invasive urothelial carcinoma (pT2 or above)	High Grade	2011		-24553	Dead	WITH TUMOR		321		Locoregional (Urothelial tumor event)	Bladder		167	Progressive Disease			1	321	1	321			1	167
TCGA-DK-A3WY-01	TCGA-DK-A3WY	BLCA	67	FEMALE	WHITE	Stage III		Muscle invasive urothelial carcinoma (pT2 or above)	High Grade	2001		-24536	Alive	TUMOR FREE	4967							Complete Remission/Response			0	4967	0	4967	0	4967	0	4967
TCGA-DK-A3X1-01	TCGA-DK-A3X1	BLCA	78	FEMALE	WHITE	Stage III		Muscle invasive urothelial carcinoma (pT2 or above)	High Grade	2009		-28757	Alive	TUMOR FREE	2009							Complete Remission/Response			0	2009	0	2009	0	2009	0	2009
TCGA-DK-A3X2-01	TCGA-DK-A3X2	BLCA	85	MALE	WHITE	Stage IV		Muscle invasive urothelial carcinoma (pT2 or above)	High Grade	2010		-31160	Dead	WITH TUMOR		547		Distant Metastasis	Liver		533	Complete Remission/Response			1	547	1	547			1	533
TCGA-DK-A6AV-01	TCGA-DK-A6AV	BLCA	82	FEMALE	ASIAN	Stage II		Muscle invasive urothelial carcinoma (pT2 or above)	High Grade	2008		-30089	Alive	TUMOR FREE	1952							Complete Remission/Response			0	1952	0	1952	0	1952	0	1952
TCGA-DK-A6AW-01	TCGA-DK-A6AW	BLCA	70	MALE	WHITE	Stage II		Muscle invasive urothelial carcinoma (pT2 or above)	High Grade	2010		-25644	Alive	TUMOR FREE	1621							Complete Remission/Response			0	1621	0	1621	0	1621	0	1621
TCGA-DK-A6B0-01	TCGA-DK-A6B0	BLCA	61	MALE	WHITE	Stage II		Muscle invasive urothelial carcinoma (pT2 or above)	High Grade	2007		-22439	Alive	TUMOR FREE	2330							Complete Remission/Response			0	2330	0	2330	0	2330	0	2330
TCGA-DK-A6B1-01	TCGA-DK-A6B1	BLCA	67	MALE	WHITE	Stage II		Muscle invasive urothelial carcinoma (pT2 or above)	High Grade	2007		-24607	Alive	TUMOR FREE	2049							Complete Remission/Response			0	2049	0	2049	0	2049	0	2049
TCGA-DK-A6B2-01	TCGA-DK-A6B2	BLCA	70	MALE	WHITE	Stage IV		Muscle invasive urothelial carcinoma (pT2 or above)	High Grade	2012		-25625	Alive	WITH TUMOR	477			Distant Metastasis	Liver		268	Complete Remission/Response			0	477	0	477			1	268
TCGA-DK-A6B5-01	TCGA-DK-A6B5	BLCA	45	MALE	WHITE	Stage IV		Muscle invasive urothelial carcinoma (pT2 or above)	High Grade	2010		-16453	Alive	TUMOR FREE	1542							Complete Remission/Response			0	1542	0	1542			0	1542
TCGA-DK-A6B6-01	TCGA-DK-A6B6	BLCA	57	MALE	WHITE	Stage II		Muscle invasive urothelial carcinoma (pT2 or above)	High Grade	2011		-21007	Alive	TUMOR FREE	1115							Complete Remission/Response			0	1115	0	1115	0	1115	0	1115
TCGA-DK-AA6L-01	TCGA-DK-AA6L	BLCA	48	MALE	WHITE	Stage IV		Muscle invasive urothelial carcinoma (pT2 or above)	High Grade	2010		-17635	Dead	WITH TUMOR		1163		Distant Metastasis	Bone		920	Progressive Disease			1	1163	1	1163			1	920
TCGA-DK-AA6M-01	TCGA-DK-AA6M	BLCA	64	FEMALE	WHITE	Stage II		Muscle invasive urothelial carcinoma (pT2 or above)	High Grade	2010		-23574	Alive	TUMOR FREE	1582							Partial Remission/Response			0	1582	0	1582			0	1582
TCGA-DK-AA6P-01	TCGA-DK-AA6P	BLCA	72	FEMALE	WHITE	Stage II		Muscle invasive urothelial carcinoma (pT2 or above)	High Grade	2013		-26560	Alive	TUMOR FREE	457			Distant Metastasis	Bone		16	Partial Remission/Response			0	457	0	457			1	16
TCGA-DK-AA6Q-01	TCGA-DK-AA6Q	BLCA	61	FEMALE	WHITE	Stage IV		Muscle invasive urothelial carcinoma (pT2 or above)	High Grade	2012		-22314	Dead	WITH TUMOR		413		Distant Metastasis	Liver		285	Progressive Disease			1	413	1	413			1	285
TCGA-DK-AA6R-01	TCGA-DK-AA6R	BLCA	68	MALE	WHITE	Stage IV		Muscle invasive urothelial carcinoma (pT2 or above)	High Grade	2001		-25196	Alive	WITH TUMOR	5041			New Primary Tumor	Other, specify	Colon	4907	Stable Disease			0	5041	0	5041			1	4907
TCGA-DK-AA6S-01	TCGA-DK-AA6S	BLCA	60	MALE	WHITE	Stage III		Muscle invasive urothelial carcinoma (pT2 or above)	High Grade	2000		-22027	Alive	TUMOR FREE	5050			Distant Metastasis	Other, specify	soft tissue pelvic mass	539	Complete Remission/Response			0	5050	0	5050	1	539	1	539
TCGA-DK-AA6T-01	TCGA-DK-AA6T	BLCA	63	MALE	WHITE	Stage II		Muscle invasive urothelial carcinoma (pT2 or above)	High Grade	2013		-23198	Alive	TUMOR FREE	572							Complete Remission/Response			0	572	0	572	0	572	0	572
TCGA-DK-AA6U-01	TCGA-DK-AA6U	BLCA	64	MALE	WHITE	Stage II		Muscle invasive urothelial carcinoma (pT2 or above)	[Unknown]	2013		-23611	Alive	TUMOR FREE	578							Complete Remission/Response			0	578	0	578	0	578	0	578
TCGA-DK-AA6W-01	TCGA-DK-AA6W	BLCA	78	MALE	WHITE	Stage II		Muscle invasive urothelial carcinoma (pT2 or above)	High Grade	2013		-28853	Dead	WITH TUMOR		415		Distant Metastasis	Lung		379	Stable Disease			1	415	1	415			1	379
TCGA-DK-AA6X-01	TCGA-DK-AA6X	BLCA	63	MALE	WHITE	Stage II		Muscle invasive urothelial carcinoma (pT2 or above)	High Grade	2013		-23208	Alive	TUMOR FREE	467							Progressive Disease			0	467	0	467			0	467
TCGA-DK-AA71-01	TCGA-DK-AA71	BLCA	71	MALE	WHITE	Stage II		Muscle invasive urothelial carcinoma (pT2 or above)	High Grade	2013		-25950	Alive	WITH TUMOR	415							Stable Disease			0	415	0	415			0	415
TCGA-DK-AA74-01	TCGA-DK-AA74	BLCA	75	MALE	WHITE	Stage III		Muscle invasive urothelial carcinoma (pT2 or above)	High Grade	2010		-27730	Alive	TUMOR FREE	1708							Complete Remission/Response			0	1708	0	1708	0	1708	0	1708
TCGA-DK-AA75-01	TCGA-DK-AA75	BLCA	82	MALE	WHITE	Stage III		Muscle invasive urothelial carcinoma (pT2 or above)	High Grade	2013		-30090	Dead	WITH TUMOR		340		Distant Metastasis	Bone		328	Stable Disease			1	340	1	340			1	328
TCGA-DK-AA76-01	TCGA-DK-AA76	BLCA	64	FEMALE	WHITE	Stage II		Muscle invasive urothelial carcinoma (pT2 or above)	High Grade	2013		-23542	Alive	WITH TUMOR	366							Complete Remission/Response			0	366	0	366	0	366	0	366
TCGA-DK-AA77-01	TCGA-DK-AA77	BLCA	61	MALE	WHITE	Stage II		Muscle invasive urothelial carcinoma (pT2 or above)	High Grade	2013		-22365	Alive	TUMOR FREE	618			Distant Metastasis	Other, specify	Pelvis	467	Stable Disease			0	618	0	618			1	467
TCGA-E5-A2PC-01	TCGA-E5-A2PC	BLCA	61	FEMALE	WHITE	Stage IV		Muscle invasive urothelial carcinoma (pT2 or above)	High Grade	2008		-22308	Alive	TUMOR FREE	1326							Complete Remission/Response			0	1326	0	1326			0	1326
TCGA-E5-A4TZ-01	TCGA-E5-A4TZ	BLCA	64	MALE	WHITE	Stage IV		Muscle invasive urothelial carcinoma (pT2 or above)	High Grade	2010		-23566	Dead	WITH TUMOR		467		Locoregional (Urothelial tumor event)	Other, specify	soft tissue pelvic mass	435	Progressive Disease			1	467	1	467			1	435
TCGA-E5-A4U1-01	TCGA-E5-A4U1	BLCA	72	MALE	[Unknown]	Stage II		Muscle invasive urothelial carcinoma (pT2 or above)	High Grade	2011		-26305	Alive	WITH TUMOR	1181			Distant Metastasis	Bone		705	Complete Remission/Response			0	1181	0	1181	1	705	1	705
TCGA-E7-A3X6-01	TCGA-E7-A3X6	BLCA	70	MALE	WHITE	Stage II		Muscle invasive urothelial carcinoma (pT2 or above)	Low Grade	2011		-25584	Dead	WITH TUMOR		904		Distant Metastasis	Bone		369	Complete Remission/Response			1	904	1	904	1	369	1	369
TCGA-E7-A3Y1-01	TCGA-E7-A3Y1	BLCA	57	MALE	WHITE	Stage II		Muscle invasive urothelial carcinoma (pT2 or above)	Low Grade	2012		-20917	Alive	TUMOR FREE	163							Complete Remission/Response			0	163	0	163	0	163	0	163
TCGA-E7-A4IJ-01	TCGA-E7-A4IJ	BLCA	56	MALE	ASIAN	Stage II		Muscle invasive urothelial carcinoma (pT2 or above)	High Grade	2012		-20723	Dead	WITH TUMOR		674		Distant Metastasis	Bone		620	Complete Remission/Response			1	674	1	674	1	620	1	620
TCGA-E7-A4XJ-01	TCGA-E7-A4XJ	BLCA	66	MALE	ASIAN	Stage II		Muscle invasive urothelial carcinoma (pT2 or above)	High Grade	2012		-24279	Dead	TUMOR FREE		68						Complete Remission/Response			1	68	0	68	0	68	0	68
TCGA-E7-A519-01	TCGA-E7-A519	BLCA	72	MALE	WHITE	Stage II		Muscle invasive urothelial carcinoma (pT2 or above)	High Grade	2012		-26427	Alive	TUMOR FREE	508							Complete Remission/Response			0	508	0	508	0	508	0	508
TCGA-E7-A541-01	TCGA-E7-A541	BLCA	66	MALE	WHITE	Stage II		Muscle invasive urothelial carcinoma (pT2 or above)	High Grade	2012		-24206	Dead	TUMOR FREE		778						Complete Remission/Response			1	778	0	778	0	778	0	778
TCGA-E7-A5KE-01	TCGA-E7-A5KE	BLCA	78	FEMALE	ASIAN	Stage II		Muscle invasive urothelial carcinoma (pT2 or above)	High Grade	2012		-28714	Alive	TUMOR FREE	17										0	17	0	17			0	17
TCGA-E7-A5KF-01	TCGA-E7-A5KF	BLCA	67	MALE	ASIAN	Stage II		Muscle invasive urothelial carcinoma (pT2 or above)	Low Grade	2012		-24528	Alive	TUMOR FREE	20										0	20	0	20			0	20
TCGA-E7-A677-01	TCGA-E7-A677	BLCA	81	MALE	ASIAN	Stage II		Muscle invasive urothelial carcinoma (pT2 or above)	Low Grade	2012		-29613	Alive	TUMOR FREE	820							Complete Remission/Response			0	820	0	820	0	820	0	820
TCGA-E7-A678-01	TCGA-E7-A678	BLCA	55	MALE	ASIAN	Stage III		Muscle invasive urothelial carcinoma (pT2 or above)	Low Grade	2012		-20169	Alive	TUMOR FREE	798							Complete Remission/Response			0	798	0	798	0	798	0	798
TCGA-E7-A6MD-01	TCGA-E7-A6MD	BLCA	66	MALE	WHITE	Stage IV		Muscle invasive urothelial carcinoma (pT2 or above)	High Grade	2012		-24180	Alive		129							[Unknown]			0	129	0	129			0	129
TCGA-E7-A6ME-01	TCGA-E7-A6ME	BLCA	75	MALE	ASIAN	Stage II		Muscle invasive urothelial carcinoma (pT2 or above)	High Grade	2013		-27670	Alive	TUMOR FREE	731							Complete Remission/Response			0	731	0	731	0	731	0	731
TCGA-E7-A6MF-01	TCGA-E7-A6MF	BLCA	37	MALE	ASIAN	Stage II		Muscle invasive urothelial carcinoma (pT2 or above)	Low Grade	2013		-13867	Alive	TUMOR FREE	750							Complete Remission/Response			0	750	0	750	0	750	0	750
TCGA-E7-A7DU-01	TCGA-E7-A7DU	BLCA	73	MALE	WHITE	Stage III		Muscle invasive urothelial carcinoma (pT2 or above)	Low Grade	2013		-27000	Alive	TUMOR FREE	28							Complete Remission/Response			0	28	0	28	0	28	0	28
TCGA-E7-A7DV-01	TCGA-E7-A7DV	BLCA	44	MALE	WHITE	Stage IV		Muscle invasive urothelial carcinoma (pT2 or above)	High Grade	2013		-16145	Alive	WITH TUMOR	37							Stable Disease			0	37	0	37			0	37
TCGA-E7-A7PW-01	TCGA-E7-A7PW	BLCA	63	MALE	ASIAN	Stage III		Muscle invasive urothelial carcinoma (pT2 or above)	High Grade	2013		-23057	Alive	TUMOR FREE	416			Distant Metastasis	Bone		174	Complete Remission/Response			0	416	0	416	1	174	1	174
TCGA-E7-A7XN-01	TCGA-E7-A7XN	BLCA	66	MALE	ASIAN	Stage III		Muscle invasive urothelial carcinoma (pT2 or above)	High Grade	2013		-24466	Alive	WITH TUMOR	428			Locoregional (Urothelial tumor event)	Bladder		190	Progressive Disease			0	428	0	428			1	190
TCGA-E7-A85H-01	TCGA-E7-A85H	BLCA	64	MALE	ASIAN	Stage III		Muscle invasive urothelial carcinoma (pT2 or above)	High Grade	2013		-23497	Alive	TUMOR FREE	394							Complete Remission/Response			0	394	0	394	0	394	0	394
TCGA-E7-A8O7-01	TCGA-E7-A8O7	BLCA	52	MALE	ASIAN	Stage II		Muscle invasive urothelial carcinoma (pT2 or above)	Low Grade	2013		-19063	Alive	TUMOR FREE	466							Complete Remission/Response			0	466	0	466	0	466	0	466
TCGA-E7-A8O8-01	TCGA-E7-A8O8	BLCA	59	MALE	ASIAN	Stage II		Muscle invasive urothelial carcinoma (pT2 or above)	High Grade	2013		-21629	Alive	TUMOR FREE	13							Complete Remission/Response			0	13	0	13	0	13	0	13
TCGA-E7-A97P-01	TCGA-E7-A97P	BLCA	73	MALE	ASIAN	Stage II		Muscle invasive urothelial carcinoma (pT2 or above)	High Grade	2013		-26956	Dead	TUMOR FREE		437						Complete Remission/Response			1	437	0	437	0	437	0	437
TCGA-E7-A97Q-01	TCGA-E7-A97Q	BLCA	60	FEMALE	WHITE	Stage IV		Muscle invasive urothelial carcinoma (pT2 or above)	High Grade	2013		-22249	Dead	WITH TUMOR		246						Stable Disease			1	246	1	246			1	246
TCGA-FD-A3B3-01	TCGA-FD-A3B3	BLCA	74	FEMALE	WHITE	Stage III		Muscle invasive urothelial carcinoma (pT2 or above)	High Grade	2011		-27068	Dead	TUMOR FREE		974						Complete Remission/Response			1	974	0	974	0	974	0	974
TCGA-FD-A3B4-01	TCGA-FD-A3B4	BLCA	55	FEMALE	BLACK OR AFRICAN AMERICAN	Stage III		Muscle invasive urothelial carcinoma (pT2 or above)	High Grade	2011		-20379	Dead	WITH TUMOR		510		Locoregional (Urothelial tumor event)	Other, specify	Left posterior pelvic wall	359	Complete Remission/Response			1	510	1	510	1	359	1	359
TCGA-FD-A3B5-01	TCGA-FD-A3B5	BLCA	86	MALE	BLACK OR AFRICAN AMERICAN	Stage IV		Muscle invasive urothelial carcinoma (pT2 or above)	High Grade	2011		-31442	Dead	WITH TUMOR		272						Progressive Disease			1	272	1	272			1	272
TCGA-FD-A3B6-01	TCGA-FD-A3B6	BLCA	75	MALE	WHITE	Stage II		Muscle invasive urothelial carcinoma (pT2 or above)	High Grade	2011		-27541	Dead	TUMOR FREE		1005						Complete Remission/Response			1	1005	0	1005	0	1005	0	1005
TCGA-FD-A3B7-01	TCGA-FD-A3B7	BLCA	66	MALE	BLACK OR AFRICAN AMERICAN	Stage III		Muscle invasive urothelial carcinoma (pT2 or above)	High Grade	2011		-24245	Dead	WITH TUMOR		122		Distant Metastasis	Lymph Node Only		110	Progressive Disease			1	122	1	122			1	110
TCGA-FD-A3B8-01	TCGA-FD-A3B8	BLCA	56	MALE	WHITE	Stage II		Muscle invasive urothelial carcinoma (pT2 or above)	High Grade	2011		-20555	Alive	TUMOR FREE	384							Complete Remission/Response			0	384	0	384	0	384	0	384
TCGA-FD-A3N5-01	TCGA-FD-A3N5	BLCA	69	MALE	BLACK OR AFRICAN AMERICAN	Stage II		Muscle invasive urothelial carcinoma (pT2 or above)	High Grade	2011		-25342	Dead	WITH TUMOR		685		Locoregional (Urothelial tumor event)	Other, specify	Pelvis	346				1	685	1	685			1	346
TCGA-FD-A3N6-01	TCGA-FD-A3N6	BLCA	43	FEMALE	BLACK OR AFRICAN AMERICAN	Stage II		Muscle invasive urothelial carcinoma (pT2 or above)	High Grade	2011		-15758	Alive	TUMOR FREE	851							Complete Remission/Response			0	851	0	851	0	851	0	851
TCGA-FD-A3NA-01	TCGA-FD-A3NA	BLCA	60	MALE	WHITE	Stage II		Muscle invasive urothelial carcinoma (pT2 or above)	High Grade	2009		-21936	Alive	TUMOR FREE	1845			New Primary Tumor	Lung		1338	Complete Remission/Response			0	1845	0	1845	0	1845	1	1338
TCGA-FD-A3SJ-01	TCGA-FD-A3SJ	BLCA	59	MALE	WHITE	Stage IV		Muscle invasive urothelial carcinoma (pT2 or above)	High Grade	2010		-21615	Dead	WITH TUMOR		739		Distant Metastasis	Lymph Node Only		281				1	739	1	739			1	281
TCGA-FD-A3SL-01	TCGA-FD-A3SL	BLCA	60	MALE	WHITE	Stage IV		Muscle invasive urothelial carcinoma (pT2 or above)	High Grade	2011		-22020	Dead	WITH TUMOR		712		Distant Metastasis	Lung		260	Progressive Disease			1	712	1	712			1	260
TCGA-FD-A3SM-01	TCGA-FD-A3SM	BLCA	70	MALE	WHITE	Stage IV		Muscle invasive urothelial carcinoma (pT2 or above)	High Grade	2011		-25852	Dead	WITH TUMOR		547		Distant Metastasis	Lymph Node Only		144	[Unknown]			1	547	1	547			1	144
TCGA-FD-A3SN-01	TCGA-FD-A3SN	BLCA	79	MALE	WHITE	Stage III		Muscle invasive urothelial carcinoma (pT2 or above)	High Grade	2011		-29169	Alive	TUMOR FREE	887			Distant Metastasis	Lung		110	Progressive Disease			0	887	0	887			1	110
TCGA-FD-A3SO-01	TCGA-FD-A3SO	BLCA	68	MALE	WHITE	Stage IV		Muscle invasive urothelial carcinoma (pT2 or above)	High Grade	2012		-25147	Dead	WITH TUMOR		168		Locoregional (Urothelial tumor event)	Renal Pelvis		143	Progressive Disease			1	168	1	168			1	143
TCGA-FD-A3SP-01	TCGA-FD-A3SP	BLCA	60	MALE	WHITE	Stage III		Muscle invasive urothelial carcinoma (pT2 or above)	High Grade	2012		-22005	Alive	TUMOR FREE	783							Complete Remission/Response			0	783	0	783	0	783	0	783
TCGA-FD-A3SQ-01	TCGA-FD-A3SQ	BLCA	62	MALE	WHITE	Stage IV		Muscle invasive urothelial carcinoma (pT2 or above)	High Grade	2008		-22687	Dead	WITH TUMOR		1423		Locoregional (Urothelial tumor event)	Other, specify	sigmoid colon	991	Stable Disease			1	1423	1	1423			1	991
TCGA-FD-A3SR-01	TCGA-FD-A3SR	BLCA	68	MALE	WHITE	Stage IV		Muscle invasive urothelial carcinoma (pT2 or above)	High Grade	2010		-24979	Dead	WITH TUMOR		602		Locoregional (Urothelial tumor event)	Other, specify	pelvis	372	[Unknown]			1	602	1	602			1	372
TCGA-FD-A3SS-01	TCGA-FD-A3SS	BLCA	66	MALE	WHITE	Stage IV		Muscle invasive urothelial carcinoma (pT2 or above)	High Grade	2012		-24408	Dead	WITH TUMOR		391		Locoregional (Urothelial tumor event)	Other, specify	local & retroperitonium	220	[Unknown]			1	391	1	391			1	220
TCGA-FD-A43N-01	TCGA-FD-A43N	BLCA	76	MALE	WHITE	Stage III		Muscle invasive urothelial carcinoma (pT2 or above)	High Grade	2011		-27833	Alive	TUMOR FREE	699										0	699	0	699			0	699
TCGA-FD-A43P-01	TCGA-FD-A43P	BLCA	74	MALE	BLACK OR AFRICAN AMERICAN	Stage II		Muscle invasive urothelial carcinoma (pT2 or above)	High Grade	2012		-27201	Alive	TUMOR FREE	832							Complete Remission/Response			0	832	0	832	0	832	0	832
TCGA-FD-A43S-01	TCGA-FD-A43S	BLCA	71	FEMALE	WHITE	Stage III		Muscle invasive urothelial carcinoma (pT2 or above)	High Grade	2012		-25993	Alive	TUMOR FREE	455							Complete Remission/Response			0	455	0	455	0	455	0	455
TCGA-FD-A43U-01	TCGA-FD-A43U	BLCA	70	MALE	WHITE	Stage IV		Muscle invasive urothelial carcinoma (pT2 or above)	High Grade	2012		-25841	Alive	WITH TUMOR	636			Distant Metastasis	Bone		497	Complete Remission/Response			0	636	0	636			1	497
TCGA-FD-A43X-01	TCGA-FD-A43X	BLCA	84	MALE	WHITE	Stage II		Muscle invasive urothelial carcinoma (pT2 or above)	High Grade	2012		-30764	Alive	TUMOR FREE	110							Complete Remission/Response			0	110	0	110	0	110	0	110
TCGA-FD-A43Y-01	TCGA-FD-A43Y	BLCA	65	MALE	WHITE	Stage III		Muscle invasive urothelial carcinoma (pT2 or above)	High Grade	2012		-23889	Dead	TUMOR FREE		474						Complete Remission/Response			1	474	0	474	0	474	0	474
TCGA-FD-A5BR-01	TCGA-FD-A5BR	BLCA	57	MALE	WHITE	Stage II		Muscle invasive urothelial carcinoma (pT2 or above)	High Grade	2012		-20964	Alive	TUMOR FREE	813							Complete Remission/Response			0	813	0	813	0	813	0	813
TCGA-FD-A5BS-01	TCGA-FD-A5BS	BLCA	68	MALE	WHITE	Stage III		Muscle invasive urothelial carcinoma (pT2 or above)	High Grade	2009		-24963	Alive	TUMOR FREE	1639							Complete Remission/Response			0	1639	0	1639	0	1639	0	1639
TCGA-FD-A5BT-01	TCGA-FD-A5BT	BLCA	84	MALE	WHITE	Stage III		Muscle invasive urothelial carcinoma (pT2 or above)	High Grade	2011		-30686	Dead	TUMOR FREE		328									1	328	0	328			0	328
TCGA-FD-A5BU-01	TCGA-FD-A5BU	BLCA	76	FEMALE	BLACK OR AFRICAN AMERICAN	Stage II		Muscle invasive urothelial carcinoma (pT2 or above)	High Grade	2012		-27882	Alive	TUMOR FREE	588							Complete Remission/Response			0	588	0	588	0	588	0	588
TCGA-FD-A5BV-01	TCGA-FD-A5BV	BLCA	47	FEMALE	WHITE	Stage III		Muscle invasive urothelial carcinoma (pT2 or above)	High Grade	2012		-17501	Dead	WITH TUMOR		163		Locoregional (Urothelial tumor event)	Other, specify	Peritoneal carcinomatosis	134	Progressive Disease			1	163	1	163			1	134
TCGA-FD-A5BX-01	TCGA-FD-A5BX	BLCA	82	MALE	WHITE	Stage IV		Muscle invasive urothelial carcinoma (pT2 or above)	High Grade	2012		-30276	Dead	WITH TUMOR		173		Locoregional (Urothelial tumor event)	Lymph Node Only		99	Progressive Disease			1	173	1	173			1	99
TCGA-FD-A5BY-01	TCGA-FD-A5BY	BLCA	63	FEMALE	WHITE	Stage III		Muscle invasive urothelial carcinoma (pT2 or above)	High Grade	2012		-23080	Alive	TUMOR FREE	251							Complete Remission/Response			0	251	0	251	0	251	0	251
TCGA-FD-A5BZ-01	TCGA-FD-A5BZ	BLCA	77	FEMALE	WHITE	Stage IV		Muscle invasive urothelial carcinoma (pT2 or above)	High Grade	2009		-28451	Dead	WITH TUMOR		835		Locoregional (Urothelial tumor event)	Lymph Node Only		533				1	835	1	835			1	533
TCGA-FD-A5C0-01	TCGA-FD-A5C0	BLCA	61	MALE	WHITE	Stage IV		Muscle invasive urothelial carcinoma (pT2 or above)	High Grade	2012		-22500	Dead	WITH TUMOR		550		New Primary Tumor	Lung		27	Complete Remission/Response			1	550	1	550			1	27
TCGA-FD-A5C1-01	TCGA-FD-A5C1	BLCA	61	FEMALE	WHITE	Stage III		Muscle invasive urothelial carcinoma (pT2 or above)	High Grade	2009		-22505	Alive	TUMOR FREE	1792							Complete Remission/Response			0	1792	0	1792	0	1792	0	1792
TCGA-FD-A62N-01	TCGA-FD-A62N	BLCA	69	MALE	ASIAN	Stage III		Muscle invasive urothelial carcinoma (pT2 or above)	High Grade	2012		-25297	Alive	TUMOR FREE	82							Complete Remission/Response			0	82	0	82	0	82	0	82
TCGA-FD-A62O-01	TCGA-FD-A62O	BLCA	74	MALE	WHITE	Stage IV		Muscle invasive urothelial carcinoma (pT2 or above)	High Grade	2012		-27310	Dead	TUMOR FREE		216						[Unknown]			1	216	0	216			0	216
TCGA-FD-A62P-01	TCGA-FD-A62P	BLCA	76	MALE	WHITE	Stage II		Muscle invasive urothelial carcinoma (pT2 or above)	High Grade	2012		-27843	Dead	WITH TUMOR		191									1	191	1	191			1	191
TCGA-FD-A62S-01	TCGA-FD-A62S	BLCA	60	FEMALE	BLACK OR AFRICAN AMERICAN	Stage III		Muscle invasive urothelial carcinoma (pT2 or above)	High Grade	2013		-22000	Dead	WITH TUMOR		406		Distant Metastasis	Other, specify	sigmoid colon	306	Progressive Disease			1	406	1	406			1	306
TCGA-FD-A6TA-01	TCGA-FD-A6TA	BLCA	58	MALE	WHITE	Stage IV		Muscle invasive urothelial carcinoma (pT2 or above)	High Grade	2009		-21196	Alive	TUMOR FREE	1912							Complete Remission/Response			0	1912	0	1912			0	1912
TCGA-FD-A6TB-01	TCGA-FD-A6TB	BLCA	82	MALE	WHITE	Stage III		Muscle invasive urothelial carcinoma (pT2 or above)	High Grade	2012		-30185	Alive	TUMOR FREE	572							Complete Remission/Response			0	572	0	572	0	572	0	572
TCGA-FD-A6TC-01	TCGA-FD-A6TC	BLCA	79	FEMALE	WHITE	Stage III		Muscle invasive urothelial carcinoma (pT2 or above)	High Grade	2013		-28963	Alive	TUMOR FREE	187							Complete Remission/Response			0	187	0	187	0	187	0	187
TCGA-FD-A6TD-01	TCGA-FD-A6TD	BLCA	77	MALE	WHITE	Stage III		Muscle invasive urothelial carcinoma (pT2 or above)	High Grade	2012		-28328	Dead	TUMOR FREE		386						Complete Remission/Response			1	386	0	386	0	386	0	386
TCGA-FD-A6TE-01	TCGA-FD-A6TE	BLCA	54	MALE	WHITE	Stage IV		Muscle invasive urothelial carcinoma (pT2 or above)	High Grade	2013		-19874	Alive	TUMOR FREE	376			Distant Metastasis	Other, specify	sacrum	321	[Unknown]			0	376	0	376			1	321
TCGA-FD-A6TF-01	TCGA-FD-A6TF	BLCA	80	FEMALE	WHITE	Stage IV		Muscle invasive urothelial carcinoma (pT2 or above)	High Grade	2013		-29317	Dead	TUMOR FREE		69						Progressive Disease			1	69	0	69			0	69
TCGA-FD-A6TG-01	TCGA-FD-A6TG	BLCA	73	MALE	WHITE	Stage IV		Muscle invasive urothelial carcinoma (pT2 or above)	High Grade	2013		-26893	Dead	TUMOR FREE		93									1	93	0	93			0	93
TCGA-FD-A6TH-01	TCGA-FD-A6TH	BLCA	63	MALE	WHITE	Stage IV		Muscle invasive urothelial carcinoma (pT2 or above)	High Grade	2013		-23236	Dead	WITH TUMOR		131		Distant Metastasis	Lung		126	Complete Remission/Response			1	131	1	131			1	126
TCGA-FD-A6TI-01	TCGA-FD-A6TI	BLCA	73	MALE	WHITE	Stage IV		Muscle invasive urothelial carcinoma (pT2 or above)	High Grade	2013		-26874	Dead	TUMOR FREE		294						[Unknown]			1	294	0	294			0	294
TCGA-FD-A6TK-01	TCGA-FD-A6TK	BLCA	60	MALE	WHITE	Stage III		Muscle invasive urothelial carcinoma (pT2 or above)	High Grade	2013		-21942	Alive	TUMOR FREE	330							Complete Remission/Response			0	330	0	330	0	330	0	330
TCGA-FJ-A3Z7-01	TCGA-FJ-A3Z7	BLCA	76	MALE	WHITE	Stage IV		Muscle invasive urothelial carcinoma (pT2 or above)	High Grade	2010		-28052	Alive	TUMOR FREE	945							Complete Remission/Response			0	945	0	945			0	945
TCGA-FJ-A3Z9-01	TCGA-FJ-A3Z9	BLCA	72	MALE	WHITE			Muscle invasive urothelial carcinoma (pT2 or above)	High Grade	2012		-26515	Dead	TUMOR FREE		385						Complete Remission/Response			1	385	0	385	0	385	0	385
TCGA-FJ-A3ZE-01	TCGA-FJ-A3ZE	BLCA	65	MALE	WHITE	Stage IV		Muscle invasive urothelial carcinoma (pT2 or above)	High Grade	2012		-23866	Dead	WITH TUMOR		324		Distant Metastasis	Bone		152	Progressive Disease			1	324	1	324			1	152
TCGA-FJ-A3ZF-01	TCGA-FJ-A3ZF	BLCA	73	MALE	WHITE	Stage III		Muscle invasive urothelial carcinoma (pT2 or above)	High Grade	2012		-26825	Alive	TUMOR FREE	524							Complete Remission/Response			0	524	0	524	0	524	0	524
TCGA-FJ-A871-01	TCGA-FJ-A871	BLCA	49	MALE	WHITE	Stage III		Muscle invasive urothelial carcinoma (pT2 or above)	High Grade	2013		-18051	Dead	WITH TUMOR		272		Locoregional (Urothelial tumor event)	Other, specify	Pelvic	106	Progressive Disease			1	272	1	272			1	106
TCGA-FT-A3EE-01	TCGA-FT-A3EE	BLCA	80	FEMALE	WHITE	Stage III		Muscle invasive urothelial carcinoma (pT2 or above)	High Grade	2011		-29293	Dead	TUMOR FREE		99									1	99	0	99			0	99
TCGA-FT-A61P-01	TCGA-FT-A61P	BLCA	76	MALE	WHITE	Stage IV		Muscle invasive urothelial carcinoma (pT2 or above)	High Grade	2013		-28082	Alive	TUMOR FREE	337							Complete Remission/Response			0	337	0	337			0	337
TCGA-G2-A2EC-01	TCGA-G2-A2EC	BLCA	58	FEMALE	BLACK OR AFRICAN AMERICAN	Stage II		Muscle invasive urothelial carcinoma (pT2 or above)	High Grade	2010		-21215	Dead	WITH TUMOR		696		Distant Metastasis	Other, specify	small bowel	679	Partial Remission/Response			1	696	1	696			1	679
TCGA-G2-A2EF-01	TCGA-G2-A2EF	BLCA	50	MALE	WHITE	Stage II		Muscle invasive urothelial carcinoma (pT2 or above)	High Grade	2007		-18467	Alive	TUMOR FREE	1884							Partial Remission/Response			0	1884	0	1884			0	1884
TCGA-G2-A2EJ-01	TCGA-G2-A2EJ	BLCA	56	FEMALE	WHITE	Stage II		Muscle invasive urothelial carcinoma (pT2 or above)	High Grade	2009		-20649	Alive	TUMOR FREE	1460			Distant Metastasis	Lung		910	Complete Remission/Response			0	1460	0	1460	1	910	1	910
TCGA-G2-A2EK-01	TCGA-G2-A2EK	BLCA	57	MALE	WHITE	Stage II		Muscle invasive urothelial carcinoma (pT2 or above)	High Grade	2010		-20995	Alive	WITH TUMOR	485			Distant Metastasis	Renal Pelvis		485	Stable Disease			0	485	0	485			1	485
TCGA-G2-A2EL-01	TCGA-G2-A2EL	BLCA	77	MALE	WHITE	Stage II		Muscle invasive urothelial carcinoma (pT2 or above)	High Grade	2009		-28370	Dead	WITH TUMOR		819		Distant Metastasis	Bone		105	Stable Disease			1	819	1	819			1	105
TCGA-G2-A2EO-01	TCGA-G2-A2EO	BLCA	69	MALE	WHITE	Stage III		Muscle invasive urothelial carcinoma (pT2 or above)	High Grade	2009		-25440	Dead	TUMOR FREE		1804						Complete Remission/Response			1	1804	0	1804	0	1804	0	1804
TCGA-G2-A2ES-01	TCGA-G2-A2ES	BLCA	85	MALE	WHITE	Stage II		Muscle invasive urothelial carcinoma (pT2 or above)	High Grade	2009		-31293	Dead	WITH TUMOR		1004		New Primary Tumor	Other, specify		897	Progressive Disease			1	1004	1	1004			1	897
TCGA-G2-A3IB-01	TCGA-G2-A3IB	BLCA	66	MALE	BLACK OR AFRICAN AMERICAN	Stage II		Muscle invasive urothelial carcinoma (pT2 or above)	High Grade	2008		-24149	Dead	WITH TUMOR		220						Progressive Disease			1	220	1	220			1	220
TCGA-G2-A3IE-01	TCGA-G2-A3IE	BLCA	51	MALE	WHITE	Stage II		Muscle invasive urothelial carcinoma (pT2 or above)	High Grade	2007		-18983	Dead	WITH TUMOR		612						Progressive Disease			1	612	1	612			1	612
TCGA-G2-A3VY-01	TCGA-G2-A3VY	BLCA	66	MALE	ASIAN	Stage II		Muscle invasive urothelial carcinoma (pT2 or above)	High Grade	2012		-24112	Alive	WITH TUMOR	536							Stable Disease			0	536	0	536			0	536
TCGA-G2-AA3B-01	TCGA-G2-AA3B	BLCA	75	FEMALE	WHITE	Stage II		Muscle invasive urothelial carcinoma (pT2 or above)	High Grade	2009		-27646	Alive	TUMOR FREE	2008							Complete Remission/Response			0	2008	0	2008	0	2008	0	2008
TCGA-G2-AA3C-01	TCGA-G2-AA3C	BLCA	66	MALE	WHITE	Stage IV		Muscle invasive urothelial carcinoma (pT2 or above)	High Grade	2009		-24267	Dead	WITH TUMOR		211						[Unknown]			1	211	1	211			1	211
TCGA-G2-AA3D-01	TCGA-G2-AA3D	BLCA	60	MALE	WHITE	Stage IV		Muscle invasive urothelial carcinoma (pT2 or above)	High Grade	2009		-22205	Alive	TUMOR FREE	2139							Complete Remission/Response			0	2139	0	2139			0	2139
TCGA-G2-AA3F-01	TCGA-G2-AA3F	BLCA	77	MALE	WHITE	Stage IV		Muscle invasive urothelial carcinoma (pT2 or above)	High Grade	2012		-28457	Alive	TUMOR FREE	893							Partial Remission/Response			0	893	0	893			0	893
TCGA-GC-A3BM-01	TCGA-GC-A3BM	BLCA	70	MALE	WHITE	Stage II		Muscle invasive urothelial carcinoma (pT2 or above)	High Grade	2010		-25609	Dead	WITH TUMOR		651						Progressive Disease			1	651	1	651			1	651
TCGA-GC-A3BM-11	TCGA-GC-A3BM	BLCA	70	MALE	WHITE	Stage II		Muscle invasive urothelial carcinoma (pT2 or above)	High Grade	2010		-25609	Dead	WITH TUMOR		651						Progressive Disease			1	651	1	651			1	651
TCGA-GC-A3I6-01	TCGA-GC-A3I6	BLCA	45	MALE	WHITE	Stage III		Muscle invasive urothelial carcinoma (pT2 or above)	High Grade	2011		-16504	Dead	WITH TUMOR		630		Locoregional (Urothelial tumor event)	Bladder		546	Progressive Disease			1	630	1	630			1	546
TCGA-GC-A3OO-01	TCGA-GC-A3OO	BLCA	79	MALE	WHITE	Stage II		Muscle invasive urothelial carcinoma (pT2 or above)	High Grade	2011		-29065	Alive	TUMOR FREE	481							Complete Remission/Response			0	481	0	481	0	481	0	481
TCGA-GC-A3RB-01	TCGA-GC-A3RB	BLCA	54	MALE	WHITE	Stage III		Muscle invasive urothelial carcinoma (pT2 or above)	High Grade	2011		-20021	Alive	TUMOR FREE	582							Complete Remission/Response			0	582	0	582	0	582	0	582
TCGA-GC-A3RC-01	TCGA-GC-A3RC	BLCA	59	MALE	WHITE	Stage II		Muscle invasive urothelial carcinoma (pT2 or above)	High Grade	2011		-21668	Alive	TUMOR FREE	484							Complete Remission/Response			0	484	0	484	0	484	0	484
TCGA-GC-A3RD-01	TCGA-GC-A3RD	BLCA	83	FEMALE	WHITE	Stage III		Muscle invasive urothelial carcinoma (pT2 or above)	High Grade	2011		-30529	Alive	TUMOR FREE	428							Complete Remission/Response			0	428	0	428	0	428	0	428
TCGA-GC-A3WC-01	TCGA-GC-A3WC	BLCA	80	FEMALE	WHITE	Stage III		Muscle invasive urothelial carcinoma (pT2 or above)	High Grade	2011		-29295	Alive	TUMOR FREE	540							Complete Remission/Response			0	540	0	540	0	540	0	540
TCGA-GC-A3WC-11	TCGA-GC-A3WC	BLCA	80	FEMALE	WHITE	Stage III		Muscle invasive urothelial carcinoma (pT2 or above)	High Grade	2011		-29295	Alive	TUMOR FREE	540							Complete Remission/Response			0	540	0	540	0	540	0	540
TCGA-GC-A3YS-01	TCGA-GC-A3YS	BLCA	61	MALE	WHITE	Stage IV		Muscle invasive urothelial carcinoma (pT2 or above)	High Grade	2012		-22515	Alive	TUMOR FREE	758							Complete Remission/Response			0	758	0	758			0	758
TCGA-GC-A4ZW-01	TCGA-GC-A4ZW	BLCA	71	MALE	WHITE	Stage III		Muscle invasive urothelial carcinoma (pT2 or above)	High Grade	2012		-25964	Alive	TUMOR FREE	15							[Unknown]			0	15	0	15			0	15
TCGA-GC-A6I1-01	TCGA-GC-A6I1	BLCA	90	FEMALE	WHITE	Stage II		Muscle invasive urothelial carcinoma (pT2 or above)	High Grade	2012		-32873	Dead	TUMOR FREE		272						Complete Remission/Response			1	272	0	272	0	272	0	272
TCGA-GC-A6I3-01	TCGA-GC-A6I3	BLCA	90	FEMALE	BLACK OR AFRICAN AMERICAN	Stage IV		Muscle invasive urothelial carcinoma (pT2 or above)	High Grade	2013		-32873	Alive	TUMOR FREE	423							Complete Remission/Response			0	423	0	423			0	423
TCGA-GC-A6I3-11	TCGA-GC-A6I3	BLCA	90	FEMALE	BLACK OR AFRICAN AMERICAN	Stage IV		Muscle invasive urothelial carcinoma (pT2 or above)	High Grade	2013		-32873	Alive	TUMOR FREE	423							Complete Remission/Response			0	423	0	423			0	423
TCGA-GD-A2C5-01	TCGA-GD-A2C5	BLCA	53	FEMALE	WHITE	Stage IV		Muscle invasive urothelial carcinoma (pT2 or above)	High Grade	2011		-19498	Alive	WITH TUMOR	812			Metastatic	Lung		214	Progressive Disease			0	812	0	812			1	214
TCGA-GD-A2C5-11	TCGA-GD-A2C5	BLCA	53	FEMALE	WHITE	Stage IV		Muscle invasive urothelial carcinoma (pT2 or above)	High Grade	2011		-19498	Alive	WITH TUMOR	812			Metastatic	Lung		214	Progressive Disease			0	812	0	812			1	214
TCGA-GD-A3OP-01	TCGA-GD-A3OP	BLCA	84	FEMALE	WHITE	Stage IV		Muscle invasive urothelial carcinoma (pT2 or above)	High Grade	2011		-30956	Alive		64							[Unknown]			0	64	0	64			0	64
TCGA-GD-A3OP-11	TCGA-GD-A3OP	BLCA	84	FEMALE	WHITE	Stage IV		Muscle invasive urothelial carcinoma (pT2 or above)	High Grade	2011		-30956	Alive		64							[Unknown]			0	64	0	64			0	64
TCGA-GD-A3OQ-01	TCGA-GD-A3OQ	BLCA	48	MALE	WHITE	Stage IV		Muscle invasive urothelial carcinoma (pT2 or above)	High Grade	2011		-17682	Alive		95							[Unknown]			0	95	0	95			0	95
TCGA-GD-A3OQ-11	TCGA-GD-A3OQ	BLCA	48	MALE	WHITE	Stage IV		Muscle invasive urothelial carcinoma (pT2 or above)	High Grade	2011		-17682	Alive		95							[Unknown]			0	95	0	95			0	95
TCGA-GD-A3OS-01	TCGA-GD-A3OS	BLCA	54	FEMALE	WHITE	Stage II		Muscle invasive urothelial carcinoma (pT2 or above)	High Grade	2011		-19776	Alive	WITH TUMOR	638			Locoregional (Urothelial tumor event)	Bladder		223	Progressive Disease			0	638	0	638			1	223
TCGA-GD-A6C6-01	TCGA-GD-A6C6	BLCA	64	MALE	WHITE	Stage III		Muscle invasive urothelial carcinoma (pT2 or above)	High Grade	2012		-23631	Alive	TUMOR FREE	67							Complete Remission/Response			0	67	0	67	0	67	0	67
TCGA-GD-A76B-01	TCGA-GD-A76B	BLCA	86	FEMALE	WHITE	Stage II		Muscle invasive urothelial carcinoma (pT2 or above)	High Grade	2013		-31571	Alive	TUMOR FREE	224							Complete Remission/Response			0	224	0	224	0	224	0	224
TCGA-GU-A42P-01	TCGA-GU-A42P	BLCA	72	MALE	WHITE	Stage IV		Muscle invasive urothelial carcinoma (pT2 or above)	High Grade	2012		-26546	Dead	TUMOR FREE		332						Stable Disease			1	332	0	332			0	332
TCGA-GU-A42Q-01	TCGA-GU-A42Q	BLCA	67	MALE	WHITE	Stage III		Muscle invasive urothelial carcinoma (pT2 or above)	High Grade	2012		-24534	Dead	TUMOR FREE		344						Complete Remission/Response			1	344	0	344	0	344	0	344
TCGA-GU-A42R-01	TCGA-GU-A42R	BLCA	68	MALE	WHITE	Stage IV		Muscle invasive urothelial carcinoma (pT2 or above)	High Grade	2012		-25134	Dead	WITH TUMOR		577		Distant Metastasis	Lung		91	Progressive Disease			1	577	1	577			1	91
TCGA-GU-A762-01	TCGA-GU-A762	BLCA	87	MALE	WHITE	Stage IV		Muscle invasive urothelial carcinoma (pT2 or above)	High Grade	2012		-31812	Dead	WITH TUMOR		232						Progressive Disease			1	232	1	232			1	232
TCGA-GU-A763-01	TCGA-GU-A763	BLCA	72	MALE	WHITE	Stage III		Muscle invasive urothelial carcinoma (pT2 or above)	High Grade	2012		-26527	Alive	WITH TUMOR	997			Distant Metastasis	Lung		303	Stable Disease			0	997	0	997			1	303
TCGA-GU-A764-01	TCGA-GU-A764	BLCA	66	MALE	WHITE	Stage II		Muscle invasive urothelial carcinoma (pT2 or above)	High Grade	2012		-24343	Alive	TUMOR FREE	610							Complete Remission/Response			0	610	0	610	0	610	0	610
TCGA-GU-A766-01	TCGA-GU-A766	BLCA	62	MALE	WHITE	Stage II		Muscle invasive urothelial carcinoma (pT2 or above)	High Grade	2013		-22774	Alive	WITH TUMOR	480							Progressive Disease			0	480	0	480			0	480
TCGA-GU-A767-01	TCGA-GU-A767	BLCA	81	MALE	WHITE	Stage IV		Muscle invasive urothelial carcinoma (pT2 or above)	High Grade	2012		-29739	Dead	WITH TUMOR		144						Progressive Disease			1	144	1	144			1	144
TCGA-GU-AATO-01	TCGA-GU-AATO	BLCA	75	MALE	WHITE	Stage IV		Muscle invasive urothelial carcinoma (pT2 or above)	High Grade	2013		-27684	Dead	WITH TUMOR		324						Progressive Disease			1	324	1	324			1	324
TCGA-GU-AATP-01	TCGA-GU-AATP	BLCA	74	MALE	WHITE	Stage IV		Muscle invasive urothelial carcinoma (pT2 or above)	High Grade	2012		-27049	Alive	WITH TUMOR	1003			New Primary Tumor	Urethra		596	Progressive Disease			0	1003	0	1003			1	596
TCGA-GU-AATQ-01	TCGA-GU-AATQ	BLCA	68	MALE	WHITE	Stage III		Muscle invasive urothelial carcinoma (pT2 or above)	High Grade	2013		-25185	Dead	WITH TUMOR		213						Stable Disease			1	213	1	213			1	213
TCGA-GV-A3JV-01	TCGA-GV-A3JV	BLCA	66	MALE	WHITE	Stage IV		Muscle invasive urothelial carcinoma (pT2 or above)	High Grade	2011		-24243	Dead	WITH TUMOR		434		Locoregional (Urothelial tumor event)	Bladder		134	Partial Remission/Response			1	434	1	434			1	134
TCGA-GV-A3JW-01	TCGA-GV-A3JW	BLCA	74	MALE	WHITE	Stage II		Muscle invasive urothelial carcinoma (pT2 or above)	High Grade	2011		-27091	Alive	WITH TUMOR	649			Distant Metastasis	Bone		271	Stable Disease			0	649	0	649			1	271
TCGA-GV-A3JX-01	TCGA-GV-A3JX	BLCA	59	MALE	WHITE	Stage III		Muscle invasive urothelial carcinoma (pT2 or above)	High Grade	2011		-21888	Alive	TUMOR FREE	581							Complete Remission/Response			0	581	0	581	0	581	0	581
TCGA-GV-A3JZ-01	TCGA-GV-A3JZ	BLCA	55	MALE	WHITE	Stage IV		Muscle invasive urothelial carcinoma (pT2 or above)	High Grade	2011		-20420	Alive	WITH TUMOR	603							Stable Disease			0	603	0	603			0	603
TCGA-GV-A3QF-01	TCGA-GV-A3QF	BLCA	79	MALE	WHITE	Stage IV		Muscle invasive urothelial carcinoma (pT2 or above)	High Grade	2011		-28890	Dead	TUMOR FREE		617						Stable Disease			1	617	0	617			0	617
TCGA-GV-A3QG-01	TCGA-GV-A3QG	BLCA	65	MALE	WHITE	Stage IV		Muscle invasive urothelial carcinoma (pT2 or above)	High Grade	2011		-23847	Dead	WITH TUMOR				Distant Metastasis	Other, specify	Brain	84				1		1				1	84
TCGA-GV-A3QH-01	TCGA-GV-A3QH	BLCA	67	MALE	WHITE	Stage II		Muscle invasive urothelial carcinoma (pT2 or above)	High Grade	2011		-24681	Dead	TUMOR FREE		258		Locoregional (Urothelial tumor event)	Bladder		125	Stable Disease			1	258	0	258			1	125
TCGA-GV-A3QI-01	TCGA-GV-A3QI	BLCA	47	MALE	WHITE	Stage III		Muscle invasive urothelial carcinoma (pT2 or above)	High Grade	2011		-17383	Alive	WITH TUMOR	1110			Distant Metastasis	Other, specify	Abdominal wall	768	Complete Remission/Response			0	1110	0	1110	1	768	1	768
TCGA-GV-A3QK-01	TCGA-GV-A3QK	BLCA	56	FEMALE	WHITE	Stage IV		Muscle invasive urothelial carcinoma (pT2 or above)	High Grade	2012		-20802	Alive	WITH TUMOR	832							Stable Disease			0	832	0	832			0	832
TCGA-GV-A40E-01	TCGA-GV-A40E	BLCA	75	MALE	WHITE	Stage II		Muscle invasive urothelial carcinoma (pT2 or above)	High Grade	2012		-27569	Dead	WITH TUMOR		261		Distant Metastasis	Lung		219	Stable Disease			1	261	1	261			1	219
TCGA-GV-A40G-01	TCGA-GV-A40G	BLCA	77	MALE	WHITE	Stage II		Muscle invasive urothelial carcinoma (pT2 or above)	High Grade	2012		-28204	Alive	TUMOR FREE	580							Complete Remission/Response			0	580	0	580	0	580	0	580
TCGA-GV-A6ZA-01	TCGA-GV-A6ZA	BLCA	54	MALE	WHITE	Stage II		Muscle invasive urothelial carcinoma (pT2 or above)	High Grade	2012		-19871	Alive	TUMOR FREE	691							Complete Remission/Response			0	691	0	691	0	691	0	691
TCGA-H4-A2HO-01	TCGA-H4-A2HO	BLCA	53	MALE	WHITE	Stage III		Muscle invasive urothelial carcinoma (pT2 or above)	High Grade	2010		-19630	Alive	TUMOR FREE	46							Complete Remission/Response			0	46	0	46	0	46	0	46
TCGA-H4-A2HQ-01	TCGA-H4-A2HQ	BLCA	64	FEMALE	BLACK OR AFRICAN AMERICAN	Stage IV		Muscle invasive urothelial carcinoma (pT2 or above)	High Grade	2010		-23538	Alive	WITH TUMOR	590			Distant Metastasis	Lung		318	Complete Remission/Response			0	590	0	590			1	318
TCGA-HQ-A2OE-01	TCGA-HQ-A2OE	BLCA	69	MALE	[Not Evaluated]			Muscle invasive urothelial carcinoma (pT2 or above)	[Unknown]	2007			Alive		1174							[Unknown]			0	1174	0	1174			0	1174
TCGA-HQ-A2OF-01	TCGA-HQ-A2OF	BLCA	52	FEMALE	[Not Evaluated]	Stage III		Muscle invasive urothelial carcinoma (pT2 or above)	High Grade			-19016	Alive	TUMOR FREE	1947			Locoregional (Urothelial tumor event)	Lymph Node Only		907	Complete Remission/Response			0	1947	0	1947	1	907	1	907
TCGA-HQ-A5ND-01	TCGA-HQ-A5ND	BLCA	78	MALE	[Not Evaluated]	Stage IV		Muscle invasive urothelial carcinoma (pT2 or above)	High Grade			-28555	Dead	WITH TUMOR		274		Distant Metastasis	Lymph Node Only		84	Progressive Disease			1	274	1	274			1	84
TCGA-HQ-A5NE-01	TCGA-HQ-A5NE	BLCA	57	MALE	[Not Evaluated]	Stage III		Muscle invasive urothelial carcinoma (pT2 or above)	High Grade			-20647	Dead	WITH TUMOR		370		Distant Metastasis	Renal Pelvis		211	Complete Remission/Response			1	370	1	370	1	211	1	211
TCGA-K4-A3WS-01	TCGA-K4-A3WS	BLCA	66	MALE	WHITE	Stage III		Muscle invasive urothelial carcinoma (pT2 or above)	High Grade	2011		-24124	Alive	TUMOR FREE	761							Complete Remission/Response			0	761	0	761	0	761	0	761
TCGA-K4-A3WU-01	TCGA-K4-A3WU	BLCA	87	MALE	WHITE	Stage III		Muscle invasive urothelial carcinoma (pT2 or above)	High Grade	2012		-32134	Alive	TUMOR FREE	105										0	105	0	105			0	105
TCGA-K4-A3WV-01	TCGA-K4-A3WV	BLCA	77	FEMALE	WHITE	Stage II		Muscle invasive urothelial carcinoma (pT2 or above)	High Grade	2011		-28444	Alive	TUMOR FREE	646										0	646	0	646			0	646
TCGA-K4-A3WV-11	TCGA-K4-A3WV	BLCA	77	FEMALE	WHITE	Stage II		Muscle invasive urothelial carcinoma (pT2 or above)	High Grade	2011		-28444	Alive	TUMOR FREE	646										0	646	0	646			0	646
TCGA-K4-A4AB-01	TCGA-K4-A4AB	BLCA	76	MALE	WHITE	Stage III		Muscle invasive urothelial carcinoma (pT2 or above)	High Grade	2012		-27922	Alive		84							Partial Remission/Response			0	84	0	84			0	84
TCGA-K4-A4AC-01	TCGA-K4-A4AC	BLCA	83	MALE	WHITE	Stage II		Muscle invasive urothelial carcinoma (pT2 or above)	High Grade	2012		-30655	Dead	WITH TUMOR		278		Distant Metastasis	Other, specify	psoas	170	Partial Remission/Response			1	278	1	278			1	170
TCGA-K4-A54R-01	TCGA-K4-A54R	BLCA	59	MALE	WHITE	Stage II		Muscle invasive urothelial carcinoma (pT2 or above)	High Grade	2012		-21601	Alive	TUMOR FREE	842							Complete Remission/Response			0	842	0	842	0	842	0	842
TCGA-K4-A54R-11	TCGA-K4-A54R	BLCA	59	MALE	WHITE	Stage II		Muscle invasive urothelial carcinoma (pT2 or above)	High Grade	2012		-21601	Alive	TUMOR FREE	842							Complete Remission/Response			0	842	0	842	0	842	0	842
TCGA-K4-A5RH-01	TCGA-K4-A5RH	BLCA	69	MALE	WHITE	Stage III		Muscle invasive urothelial carcinoma (pT2 or above)	High Grade	2012		-25305	Alive	WITH TUMOR	276			Distant Metastasis	Lung		196	Progressive Disease			0	276	0	276			1	196
TCGA-K4-A5RI-01	TCGA-K4-A5RI	BLCA	67	FEMALE	WHITE	Stage III		Muscle invasive urothelial carcinoma (pT2 or above)	High Grade	2012		-24614	Dead	WITH TUMOR		356		Locoregional (Urothelial tumor event)	Other, specify	ileum	236	Progressive Disease			1	356	1	356			1	236
TCGA-K4-A5RI-11	TCGA-K4-A5RI	BLCA	67	FEMALE	WHITE	Stage III		Muscle invasive urothelial carcinoma (pT2 or above)	High Grade	2012		-24614	Dead	WITH TUMOR		356		Locoregional (Urothelial tumor event)	Other, specify	ileum	236	Progressive Disease			1	356	1	356			1	236
TCGA-K4-A5RJ-01	TCGA-K4-A5RJ	BLCA	75	MALE	WHITE	Stage II		Muscle invasive urothelial carcinoma (pT2 or above)	High Grade	2012		-27518	Alive	TUMOR FREE	539							Complete Remission/Response			0	539	0	539	0	539	0	539
TCGA-K4-A6FZ-01	TCGA-K4-A6FZ	BLCA	75	FEMALE	WHITE	Stage III		Muscle invasive urothelial carcinoma (pT2 or above)	High Grade	2012		-27686	Alive	TUMOR FREE	55							Complete Remission/Response			0	55	0	55	0	55	0	55
TCGA-K4-A6MB-01	TCGA-K4-A6MB	BLCA	64	MALE	WHITE	Stage IV		Muscle invasive urothelial carcinoma (pT2 or above)	High Grade	2013		-23664	Alive	TUMOR FREE	469							Complete Remission/Response			0	469	0	469			0	469
TCGA-K4-A83P-01	TCGA-K4-A83P	BLCA	77	MALE	WHITE	Stage IV		Muscle invasive urothelial carcinoma (pT2 or above)	[Unknown]	2013		-28463	Alive	WITH TUMOR	495			Distant Metastasis	Liver		70	Partial Remission/Response			0	495	0	495			1	70
TCGA-K4-AAQO-01	TCGA-K4-AAQO	BLCA	56	MALE	WHITE	Stage III		Muscle invasive urothelial carcinoma (pT2 or above)	High Grade	2013		-20683	Alive		359							[Unknown]			0	359	0	359			0	359
TCGA-KQ-A41N-01	TCGA-KQ-A41N	BLCA	73	MALE	BLACK OR AFRICAN AMERICAN	Stage III		Muscle invasive urothelial carcinoma (pT2 or above)	High Grade	2011		-26837	Alive	TUMOR FREE	1604							Complete Remission/Response			0	1604	0	1604	0	1604	0	1604
TCGA-KQ-A41O-01	TCGA-KQ-A41O	BLCA	84	MALE	[Unknown]	Stage IV		Muscle invasive urothelial carcinoma (pT2 or above)	High Grade	2011		-30774	Alive	TUMOR FREE	1538							Complete Remission/Response			0	1538	0	1538			0	1538
TCGA-KQ-A41P-01	TCGA-KQ-A41P	BLCA	76	MALE	WHITE	Stage IV		Muscle invasive urothelial carcinoma (pT2 or above)	High Grade	2011		-27816	Alive	WITH TUMOR	1094			Locoregional (Urothelial tumor event)	Lymph Node Only		178	Stable Disease			0	1094	0	1094			1	178
TCGA-KQ-A41Q-01	TCGA-KQ-A41Q	BLCA	89	MALE	WHITE	Stage III		Muscle invasive urothelial carcinoma (pT2 or above)	High Grade	2009		-32511	Alive		1429			Locoregional (Urothelial tumor event)	Lymph Node Only		1314	[Unknown]			0	1429	0	1429			1	1314
TCGA-KQ-A41R-01	TCGA-KQ-A41R	BLCA	80	FEMALE	WHITE	Stage II		Muscle invasive urothelial carcinoma (pT2 or above)	High Grade	2011		-29351	Alive	TUMOR FREE	1350							Complete Remission/Response			0	1350	0	1350	0	1350	0	1350
TCGA-KQ-A41S-01	TCGA-KQ-A41S	BLCA	87	FEMALE	WHITE	Stage III		Muscle invasive urothelial carcinoma (pT2 or above)	High Grade	2011		-32041	Alive	TUMOR FREE	35							Complete Remission/Response			0	35	0	35	0	35	0	35
TCGA-LC-A66R-01	TCGA-LC-A66R	BLCA	78	MALE	WHITE	Stage IV		Muscle invasive urothelial carcinoma (pT2 or above)	High Grade	2012		-28793	Alive	TUMOR FREE	466							Complete Remission/Response			0	466	0	466			0	466
TCGA-LT-A5Z6-01	TCGA-LT-A5Z6	BLCA	56	MALE	WHITE	Stage II		Muscle invasive urothelial carcinoma (pT2 or above)	High Grade	2013		-20746	Alive	TUMOR FREE	474							Complete Remission/Response			0	474	0	474	0	474	0	474
TCGA-LT-A8JT-01	TCGA-LT-A8JT	BLCA	69	FEMALE	WHITE	Stage II		Muscle invasive urothelial carcinoma (pT2 or above)	High Grade	2013		-25498	Alive	TUMOR FREE	641							Complete Remission/Response			0	641	0	641	0	641	0	641
TCGA-MV-A51V-01	TCGA-MV-A51V	BLCA	75	MALE	WHITE	Stage III		Muscle invasive urothelial carcinoma (pT2 or above)	High Grade	2012		-27430	Alive	TUMOR FREE	410							Complete Remission/Response			0	410	0	410	0	410	0	410
TCGA-PQ-A6FI-01	TCGA-PQ-A6FI	BLCA	70	MALE	WHITE	Stage II		Muscle invasive urothelial carcinoma (pT2 or above)	High Grade	2011		-25672	Alive	TUMOR FREE	372							Complete Remission/Response			0	372	0	372	0	372	0	372
TCGA-PQ-A6FN-01	TCGA-PQ-A6FN	BLCA	78	FEMALE	WHITE	Stage III		Muscle invasive urothelial carcinoma (pT2 or above)	High Grade	2011		-28546	Alive		507							[Unknown]			0	507	0	507			0	507
TCGA-R3-A69X-01	TCGA-R3-A69X	BLCA	70	MALE	WHITE	Stage III		Muscle invasive urothelial carcinoma (pT2 or above)	High Grade	2012		-25576	Alive	TUMOR FREE	433							Complete Remission/Response			0	433	0	433	0	433	0	433
TCGA-S5-A6DX-01	TCGA-S5-A6DX	BLCA	83	MALE	WHITE	Stage IV		Muscle invasive urothelial carcinoma (pT2 or above)	High Grade	2013		-30594	Dead	WITH TUMOR		56						[Unknown]			1	56	1	56			1	56
TCGA-S5-AA26-01	TCGA-S5-AA26	BLCA	46	MALE	BLACK OR AFRICAN AMERICAN	Stage III		Muscle invasive urothelial carcinoma (pT2 or above)	High Grade	2013		-16972	Alive	TUMOR FREE	503							Complete Remission/Response			0	503	0	503	0	503	0	503
TCGA-SY-A9G0-01	TCGA-SY-A9G0	BLCA	82	MALE	WHITE	Stage IV		Muscle invasive urothelial carcinoma (pT2 or above)	High Grade	2011		-30205	Dead	TUMOR FREE		1008						Complete Remission/Response			1	1008	0	1008			0	1008
TCGA-SY-A9G5-01	TCGA-SY-A9G5	BLCA	66	MALE	WHITE	Stage III		Muscle invasive urothelial carcinoma (pT2 or above)	High Grade	2011		-24260	Alive	TUMOR FREE	1186							Complete Remission/Response			0	1186	0	1186	0	1186	0	1186
TCGA-UY-A78K-01	TCGA-UY-A78K	BLCA	60	MALE	WHITE	Stage IV		Muscle invasive urothelial carcinoma (pT2 or above)	High Grade			-22020	Dead			536						Complete Remission/Response			1	536		536			0	536
TCGA-UY-A78L-01	TCGA-UY-A78L	BLCA	62	MALE	WHITE	Stage IV		Muscle invasive urothelial carcinoma (pT2 or above)	High Grade			-22717	Alive	WITH TUMOR	1127						355	Progressive Disease			0	1127	0	1127			1	355
TCGA-UY-A78M-01	TCGA-UY-A78M	BLCA	81	FEMALE	ASIAN	Stage IV		Muscle invasive urothelial carcinoma (pT2 or above)	High Grade			-29706	Dead	WITH TUMOR		690						[Unknown]			1	690	1	690			1	690
TCGA-UY-A78N-01	TCGA-UY-A78N	BLCA	80	MALE	WHITE	Stage IV		Muscle invasive urothelial carcinoma (pT2 or above)	High Grade			-29132	Dead	WITH TUMOR		2641		Distant Metastasis	Renal Pelvis		2472	Complete Remission/Response			1	2641	1	2641			1	2472
TCGA-UY-A78O-01	TCGA-UY-A78O	BLCA	75	FEMALE	WHITE	Stage II		Muscle invasive urothelial carcinoma (pT2 or above)	High Grade			-27234	Alive	TUMOR FREE	2312							Complete Remission/Response			0	2312	0	2312	0	2312	0	2312
TCGA-UY-A78P-01	TCGA-UY-A78P	BLCA	78	FEMALE	WHITE	Stage II		Muscle invasive urothelial carcinoma (pT2 or above)	High Grade			-28719	Alive	TUMOR FREE	2380							Complete Remission/Response			0	2380	0	2380	0	2380	0	2380
TCGA-UY-A8OB-01	TCGA-UY-A8OB	BLCA	63	MALE	WHITE	Stage IV		Muscle invasive urothelial carcinoma (pT2 or above)	High Grade			-23360	Alive	TUMOR FREE	2109							Complete Remission/Response			0	2109	0	2109			0	2109
TCGA-UY-A8OC-01	TCGA-UY-A8OC	BLCA	90	MALE	WHITE	Stage IV		Muscle invasive urothelial carcinoma (pT2 or above)	High Grade			-32918	Dead	WITH TUMOR		92		Distant Metastasis	Lymph Node Only		32	Partial Remission/Response			1	92	1	92			1	32
TCGA-UY-A8OD-01	TCGA-UY-A8OD	BLCA	68	FEMALE	BLACK OR AFRICAN AMERICAN	Stage II		Muscle invasive urothelial carcinoma (pT2 or above)	High Grade			-24588	Alive	TUMOR FREE	3432							Complete Remission/Response			0	3432	0	3432	0	3432	0	3432
TCGA-UY-A9PA-01	TCGA-UY-A9PA	BLCA	48	MALE	WHITE	Stage III		Muscle invasive urothelial carcinoma (pT2 or above)	High Grade			-17520	Alive	TUMOR FREE	1072							Complete Remission/Response			0	1072	0	1072	0	1072	0	1072
TCGA-UY-A9PB-01	TCGA-UY-A9PB	BLCA	49	MALE	WHITE	Stage III		Muscle invasive urothelial carcinoma (pT2 or above)	High Grade			-17885	Alive	TUMOR FREE	899							Complete Remission/Response			0	899	0	899	0	899	0	899
TCGA-UY-A9PD-01	TCGA-UY-A9PD	BLCA	80	MALE	WHITE	Stage III		Muscle invasive urothelial carcinoma (pT2 or above)	High Grade			-29565	Alive	TUMOR FREE	542							Complete Remission/Response			0	542	0	542	0	542	0	542
TCGA-UY-A9PE-01	TCGA-UY-A9PE	BLCA	86	MALE	WHITE	Stage IV		Muscle invasive urothelial carcinoma (pT2 or above)	High Grade			-31755	Alive	WITH TUMOR	189			Distant Metastasis	Lung		473	Complete Remission/Response			0	189	0	189			1	473
TCGA-UY-A9PF-01	TCGA-UY-A9PF	BLCA	77	MALE	WHITE	Stage IV		Muscle invasive urothelial carcinoma (pT2 or above)	High Grade			-28470	Alive	TUMOR FREE	117							Complete Remission/Response			0	117	0	117			0	117
TCGA-UY-A9PH-01	TCGA-UY-A9PH	BLCA	73	MALE	WHITE	Stage II		Muscle invasive urothelial carcinoma (pT2 or above)	High Grade			-26654	Alive	TUMOR FREE	1561							Complete Remission/Response			0	1561	0	1561	0	1561	0	1561
TCGA-XF-A8HB-01	TCGA-XF-A8HB	BLCA	50	FEMALE	[Unknown]	Stage II		Muscle invasive urothelial carcinoma (pT2 or above)	High Grade	2006		-18544	Alive	TUMOR FREE	1370							Complete Remission/Response			0	1370	0	1370	0	1370	0	1370
TCGA-XF-A8HC-01	TCGA-XF-A8HC	BLCA	79	MALE	ASIAN	Stage IV		Muscle invasive urothelial carcinoma (pT2 or above)	High Grade	2005		-28996	Dead			200						[Unknown]			1	200		200			0	200
TCGA-XF-A8HD-01	TCGA-XF-A8HD	BLCA	77	MALE	WHITE	Stage III		Muscle invasive urothelial carcinoma (pT2 or above)	High Grade	2006		-28305	Alive	TUMOR FREE	2964							Complete Remission/Response			0	2964	0	2964	0	2964	0	2964
TCGA-XF-A8HE-01	TCGA-XF-A8HE	BLCA	47	MALE	WHITE	Stage III		Muscle invasive urothelial carcinoma (pT2 or above)	High Grade	2004		-17212	Alive	TUMOR FREE	3817							Complete Remission/Response			0	3817	0	3817	0	3817	0	3817
TCGA-XF-A8HF-01	TCGA-XF-A8HF	BLCA	80	MALE	WHITE	Stage III		Muscle invasive urothelial carcinoma (pT2 or above)	High Grade	2004		-29288	Dead	TUMOR FREE		2954						Complete Remission/Response			1	2954	0	2954	0	2954	0	2954
TCGA-XF-A8HG-01	TCGA-XF-A8HG	BLCA	69	MALE	WHITE	Stage III		Muscle invasive urothelial carcinoma (pT2 or above)	High Grade	2005		-25421	Dead	WITH TUMOR		467		Distant Metastasis	Liver		398	Complete Remission/Response			1	467	1	467	1	398	1	398
TCGA-XF-A8HH-01	TCGA-XF-A8HH	BLCA	61	FEMALE	WHITE	Stage IV		Muscle invasive urothelial carcinoma (pT2 or above)	High Grade	2004		-22393	Dead	WITH TUMOR		57						Partial Remission/Response			1	57	1	57			1	57
TCGA-XF-A8HI-01	TCGA-XF-A8HI	BLCA	57	FEMALE	WHITE	Stage IV		Muscle invasive urothelial carcinoma (pT2 or above)	High Grade	2005		-21059	Dead	WITH TUMOR		544		Distant Metastasis	Lung		468	Progressive Disease			1	544	1	544			1	468
TCGA-XF-A9SG-01	TCGA-XF-A9SG	BLCA	81	MALE	[Unknown]	Stage II		Muscle invasive urothelial carcinoma (pT2 or above)	High Grade	2006		-29825	Alive	TUMOR FREE	1479							Complete Remission/Response			0	1479	0	1479	0	1479	0	1479
TCGA-XF-A9SH-01	TCGA-XF-A9SH	BLCA	65	FEMALE	ASIAN	Stage II		Muscle invasive urothelial carcinoma (pT2 or above)	High Grade	2005		-24060	Dead	WITH TUMOR		1971		Locoregional (Urothelial tumor event)	Lymph Node Only		547	Stable Disease			1	1971	1	1971			1	547
TCGA-XF-A9SI-01	TCGA-XF-A9SI	BLCA	73	FEMALE	ASIAN	Stage II		Muscle invasive urothelial carcinoma (pT2 or above)	High Grade	2006		-26719	Alive	TUMOR FREE	2423							Complete Remission/Response			0	2423	0	2423	0	2423	0	2423
TCGA-XF-A9SJ-01	TCGA-XF-A9SJ	BLCA	83	MALE	WHITE	Stage IV		Muscle invasive urothelial carcinoma (pT2 or above)	High Grade	2004		-30362	Dead	WITH TUMOR		98						Progressive Disease			1	98	1	98			1	98
TCGA-XF-A9SK-01	TCGA-XF-A9SK	BLCA	65	MALE	WHITE	Stage IV		Muscle invasive urothelial carcinoma (pT2 or above)	High Grade	2004		-24019	Dead	WITH TUMOR		486		Distant Metastasis	Bone		382	Stable Disease			1	486	1	486			1	382
TCGA-XF-A9SL-01	TCGA-XF-A9SL	BLCA	69	MALE	WHITE	Stage IV		Muscle invasive urothelial carcinoma (pT2 or above)	High Grade	2004		-25460	Dead	TUMOR FREE		2020						Complete Remission/Response			1	2020	0	2020			0	2020
TCGA-XF-A9SM-01	TCGA-XF-A9SM	BLCA	76	MALE	WHITE	Stage III		Muscle invasive urothelial carcinoma (pT2 or above)	High Grade	2004		-27826	Alive	TUMOR FREE	1048							Complete Remission/Response			0	1048	0	1048	0	1048	0	1048
TCGA-XF-A9SP-01	TCGA-XF-A9SP	BLCA	59	MALE	WHITE	Stage III		Muscle invasive urothelial carcinoma (pT2 or above)	High Grade	2004		-21776	Dead	WITH TUMOR		454		Locoregional (Urothelial tumor event)	Renal Pelvis		310	Stable Disease			1	454	1	454			1	310
TCGA-XF-A9ST-01	TCGA-XF-A9ST	BLCA	68	MALE	WHITE	Stage III		Muscle invasive urothelial carcinoma (pT2 or above)	High Grade	2005		-25080	Dead			128						[Unknown]			1	128		128			0	128
TCGA-XF-A9SU-01	TCGA-XF-A9SU	BLCA	74	FEMALE	WHITE	Stage IV		Muscle invasive urothelial carcinoma (pT2 or above)	High Grade	2006		-27068	Dead	WITH TUMOR		182		Distant Metastasis	Liver		103	Progressive Disease			1	182	1	182			1	103
TCGA-XF-A9SV-01	TCGA-XF-A9SV	BLCA	82	MALE	WHITE	Stage IV		Muscle invasive urothelial carcinoma (pT2 or above)	High Grade	2006		-30265	Dead	WITH TUMOR		388		Distant Metastasis	Lung		237	Progressive Disease			1	388	1	388			1	237
TCGA-XF-A9SW-01	TCGA-XF-A9SW	BLCA	85	MALE	WHITE	Stage IV		Muscle invasive urothelial carcinoma (pT2 or above)	High Grade	2006		-31049	Dead	WITH TUMOR		362						Partial Remission/Response			1	362	1	362			1	362
TCGA-XF-A9SX-01	TCGA-XF-A9SX	BLCA	63	FEMALE	WHITE	Stage IV		Muscle invasive urothelial carcinoma (pT2 or above)	High Grade	2006		-23349	Dead	WITH TUMOR		719		Distant Metastasis	Lung		475	Progressive Disease			1	719	1	719			1	475
TCGA-XF-A9SY-01	TCGA-XF-A9SY	BLCA	60	FEMALE	WHITE	Stage IV		Muscle invasive urothelial carcinoma (pT2 or above)	High Grade	2006		-22212	Alive	WITH TUMOR	640			Distant Metastasis	Other, specify	Groin	168	Progressive Disease			0	640	0	640			1	168
TCGA-XF-A9SZ-01	TCGA-XF-A9SZ	BLCA	79	MALE	WHITE	Stage IV		Muscle invasive urothelial carcinoma (pT2 or above)	High Grade	2007		-29100	Dead	WITH TUMOR		859		Distant Metastasis	Lung		854	Complete Remission/Response			1	859	1	859			1	854
TCGA-XF-A9T0-01	TCGA-XF-A9T0	BLCA	68	MALE	WHITE	Stage III		Muscle invasive urothelial carcinoma (pT2 or above)	High Grade	2007		-25190	Alive	TUMOR FREE	799							Complete Remission/Response			0	799	0	799	0	799	0	799
TCGA-XF-A9T2-01	TCGA-XF-A9T2	BLCA	54	MALE	WHITE	Stage III		Muscle invasive urothelial carcinoma (pT2 or above)	High Grade	2007		-19945	Dead			575						[Unknown]			1	575		575			0	575
TCGA-XF-A9T3-01	TCGA-XF-A9T3	BLCA	69	FEMALE	WHITE	Stage IV		Muscle invasive urothelial carcinoma (pT2 or above)	High Grade	2008		-25532	Alive	TUMOR FREE	68							[Unknown]			0	68	0	68			0	68
TCGA-XF-A9T4-01	TCGA-XF-A9T4	BLCA	48	MALE	WHITE	Stage IV		Muscle invasive urothelial carcinoma (pT2 or above)	High Grade	2008		-17728	Dead	WITH TUMOR		495		Distant Metastasis	Lung		182	Partial Remission/Response			1	495	1	495			1	182
TCGA-XF-A9T5-01	TCGA-XF-A9T5	BLCA	78	FEMALE	WHITE	Stage IV		Muscle invasive urothelial carcinoma (pT2 or above)	High Grade	2008		-28578	Alive	TUMOR FREE	2027			Locoregional (Urothelial tumor event)	Other, specify	Vagina	664	Complete Remission/Response			0	2027	0	2027			1	664
TCGA-XF-A9T6-01	TCGA-XF-A9T6	BLCA	88	FEMALE	WHITE	Stage III		Muscle invasive urothelial carcinoma (pT2 or above)	High Grade	2008		-32207	Alive		64							[Unknown]			0	64	0	64			0	64
TCGA-XF-A9T8-01	TCGA-XF-A9T8	BLCA	64	MALE	WHITE	Stage III		Muscle invasive urothelial carcinoma (pT2 or above)	High Grade	2008		-23403	Dead			418						[Unknown]			1	418		418			0	418
TCGA-XF-AAME-01	TCGA-XF-AAME	BLCA	64	FEMALE	WHITE	Stage II		Muscle invasive urothelial carcinoma (pT2 or above)	High Grade	2006		-23448	Dead	WITH TUMOR		2828		Locoregional (Urothelial tumor event)	Other, specify	Vagina	1651	Progressive Disease			1	2828	1	2828			1	1651
TCGA-XF-AAMF-01	TCGA-XF-AAMF	BLCA	68	MALE	WHITE	Stage IV		Muscle invasive urothelial carcinoma (pT2 or above)	High Grade	2004		-25023	Dead	WITH TUMOR		329		Distant Metastasis	Lung		157	Stable Disease			1	329	1	329			1	157
TCGA-XF-AAMG-01	TCGA-XF-AAMG	BLCA	49	MALE	WHITE	Stage III		Muscle invasive urothelial carcinoma (pT2 or above)	High Grade	2004		-18021	Alive	TUMOR FREE	3364							Complete Remission/Response			0	3364	0	3364	0	3364	0	3364
TCGA-XF-AAMH-01	TCGA-XF-AAMH	BLCA	80	MALE	WHITE	Stage IV		Muscle invasive urothelial carcinoma (pT2 or above)	High Grade	2005		-29547	Dead	WITH TUMOR		344		Distant Metastasis	Other, specify	lumbar spine and right hemipelvis	313	Progressive Disease			1	344	1	344			1	313
TCGA-XF-AAMJ-01	TCGA-XF-AAMJ	BLCA	70	MALE	ASIAN	Stage III		Muscle invasive urothelial carcinoma (pT2 or above)	High Grade	2006		-25838	Dead	TUMOR FREE		1670						Complete Remission/Response			1	1670	0	1670	0	1670	0	1670
TCGA-XF-AAML-01	TCGA-XF-AAML	BLCA	75	MALE	WHITE	Stage II		Muscle invasive urothelial carcinoma (pT2 or above)	High Grade	2007		-27422	Dead	TUMOR FREE		232						Complete Remission/Response			1	232	0	232	0	232	0	232
TCGA-XF-AAMQ-01	TCGA-XF-AAMQ	BLCA	59	FEMALE	WHITE	Stage II		Muscle invasive urothelial carcinoma (pT2 or above)	High Grade	2006		-21660	Alive	TUMOR FREE	2177							Complete Remission/Response			0	2177	0	2177	0	2177	0	2177
TCGA-XF-AAMR-01	TCGA-XF-AAMR	BLCA	48	MALE	WHITE	Stage III		Muscle invasive urothelial carcinoma (pT2 or above)	High Grade	2006		-17670	Alive	TUMOR FREE	2790							Complete Remission/Response			0	2790	0	2790	0	2790	0	2790
TCGA-XF-AAMT-01	TCGA-XF-AAMT	BLCA	75	FEMALE	WHITE	Stage IV		Muscle invasive urothelial carcinoma (pT2 or above)	High Grade	2006		-27397	Dead	WITH TUMOR		90						Partial Remission/Response			1	90	1	90			1	90
TCGA-XF-AAMW-01	TCGA-XF-AAMW	BLCA	79	FEMALE	WHITE	Stage IV		Muscle invasive urothelial carcinoma (pT2 or above)	High Grade	2006		-28903	Dead	WITH TUMOR		253						Partial Remission/Response			1	253	1	253			1	253
TCGA-XF-AAMX-01	TCGA-XF-AAMX	BLCA	87	FEMALE	BLACK OR AFRICAN AMERICAN	Stage III		Muscle invasive urothelial carcinoma (pT2 or above)	High Grade	2006		-31884	Dead	TUMOR FREE		206						Complete Remission/Response			1	206	0	206	0	206	0	206
TCGA-XF-AAMY-01	TCGA-XF-AAMY	BLCA	78	MALE	WHITE	Stage III		Muscle invasive urothelial carcinoma (pT2 or above)	High Grade	2006		-28509	Alive	TUMOR FREE	3011			Distant Metastasis	Lung		637	Complete Remission/Response			0	3011	0	3011	1	637	1	637
TCGA-XF-AAMZ-01	TCGA-XF-AAMZ	BLCA	81	FEMALE	WHITE	Stage IV		Muscle invasive urothelial carcinoma (pT2 or above)	High Grade	2007		-29667	Dead	WITH TUMOR		1348		Locoregional (Urothelial tumor event)	Lymph Node Only		1344	Partial Remission/Response			1	1348	1	1348			1	1344
TCGA-XF-AAN0-01	TCGA-XF-AAN0	BLCA	68	MALE	WHITE	Stage IV		Muscle invasive urothelial carcinoma (pT2 or above)	High Grade	2007		-24877	Dead	WITH TUMOR		1718		Locoregional (Urothelial tumor event)	Other, specify	Scrotum and Perineum	603	Complete Remission/Response			1	1718	1	1718			1	603
TCGA-XF-AAN1-01	TCGA-XF-AAN1	BLCA	75	FEMALE	[Unknown]	Stage III		Muscle invasive urothelial carcinoma (pT2 or above)	High Grade	2006		-27687	Dead	WITH TUMOR		941		Locoregional (Urothelial tumor event)	Other, specify	Pelvis and vagina	650	Partial Remission/Response			1	941	1	941			1	650
TCGA-XF-AAN2-01	TCGA-XF-AAN2	BLCA	73	MALE	WHITE	Stage II		Muscle invasive urothelial carcinoma (pT2 or above)	High Grade	2007		-26720	Dead	TUMOR FREE		1869						Complete Remission/Response			1	1869	0	1869	0	1869	0	1869
TCGA-XF-AAN3-01	TCGA-XF-AAN3	BLCA	76	MALE	WHITE	Stage IV		Muscle invasive urothelial carcinoma (pT2 or above)	High Grade	2007		-27909	Alive	TUMOR FREE	2625							Complete Remission/Response			0	2625	0	2625			0	2625
TCGA-XF-AAN4-01	TCGA-XF-AAN4	BLCA	77	FEMALE	WHITE	Stage III		Muscle invasive urothelial carcinoma (pT2 or above)	High Grade	2007		-28302	Dead	TUMOR FREE		823						Complete Remission/Response			1	823	0	823	0	823	0	823
TCGA-XF-AAN5-01	TCGA-XF-AAN5	BLCA	61	FEMALE	WHITE	Stage III		Muscle invasive urothelial carcinoma (pT2 or above)	High Grade	2008		-22411	Alive	TUMOR FREE	2293							Complete Remission/Response			0	2293	0	2293	0	2293	0	2293
TCGA-XF-AAN7-01	TCGA-XF-AAN7	BLCA	60	MALE	WHITE	Stage IV		Muscle invasive urothelial carcinoma (pT2 or above)	High Grade	2008		-21951	Dead	WITH TUMOR		565		Locoregional (Urothelial tumor event)	Bladder		321	Complete Remission/Response			1	565	1	565			1	321
TCGA-XF-AAN8-01	TCGA-XF-AAN8	BLCA	74	FEMALE	WHITE	Stage III		Muscle invasive urothelial carcinoma (pT2 or above)	High Grade	2007		-27309	Dead			118						[Unknown]			1	118		118			0	118
TCGA-YC-A89H-01	TCGA-YC-A89H	BLCA	78	FEMALE	WHITE	Stage II		Muscle invasive urothelial carcinoma (pT2 or above)	High Grade	2013		-28741	Alive	TUMOR FREE	573							Complete Remission/Response			0	573	0	573	0	573	0	573
TCGA-YC-A8S6-01	TCGA-YC-A8S6	BLCA	71	MALE	WHITE	Stage II		Muscle invasive urothelial carcinoma (pT2 or above)	High Grade	2013		-26130	Alive	TUMOR FREE	293							Complete Remission/Response			0	293	0	293	0	293	0	293
TCGA-YC-A9TC-01	TCGA-YC-A9TC	BLCA	71	MALE	WHITE	Stage IV		Muscle invasive urothelial carcinoma (pT2 or above)	High Grade	2013		-26283	Dead	WITH TUMOR		20						Progressive Disease			1	20	1	20			1	20
TCGA-YF-AA3L-01	TCGA-YF-AA3L	BLCA	47	FEMALE	[Unknown]	Stage II		Muscle invasive urothelial carcinoma (pT2 or above)	High Grade	2013		-17268	Alive	TUMOR FREE	364							Complete Remission/Response			0	364	0	364	0	364	0	364
TCGA-YF-AA3M-01	TCGA-YF-AA3M	BLCA	57	MALE	[Unknown]	Stage II		Muscle invasive urothelial carcinoma (pT2 or above)	High Grade	2013		-21097	Alive	WITH TUMOR	415			Locoregional (Urothelial tumor event)	Other, specify	Pelvis	381	Complete Remission/Response			0	415	0	415	1	381	1	381
TCGA-ZF-A9R0-01	TCGA-ZF-A9R0	BLCA	82	MALE	WHITE	Stage III		Muscle invasive urothelial carcinoma (pT2 or above)	High Grade	2013		-30222	Dead	WITH TUMOR		680		Locoregional (Urothelial tumor event)	Other, specify	right hemipelvis	559	Progressive Disease			1	680	1	680			1	559
TCGA-ZF-A9R1-01	TCGA-ZF-A9R1	BLCA	81	MALE	WHITE	Stage IV		Muscle invasive urothelial carcinoma (pT2 or above)	High Grade	2013		-29610	Alive	WITH TUMOR	773			Distant Metastasis	Bone		758	Complete Remission/Response			0	773	0	773			1	758
TCGA-ZF-A9R2-01	TCGA-ZF-A9R2	BLCA	75	MALE	WHITE	Stage II		Muscle invasive urothelial carcinoma (pT2 or above)	High Grade	2013		-27537	Alive	TUMOR FREE	642							Complete Remission/Response			0	642	0	642	0	642	0	642
TCGA-ZF-A9R3-01	TCGA-ZF-A9R3	BLCA	53	FEMALE	WHITE	Stage II		Muscle invasive urothelial carcinoma (pT2 or above)	High Grade	2012		-19384	Dead	WITH TUMOR		949		Distant Metastasis	Bone		917	Complete Remission/Response			1	949	1	949	1	917	1	917
TCGA-ZF-A9R4-01	TCGA-ZF-A9R4	BLCA	83	MALE	WHITE	Stage II		Muscle invasive urothelial carcinoma (pT2 or above)	High Grade	2012		-30398	Alive	TUMOR FREE	921							Complete Remission/Response			0	921	0	921	0	921	0	921
TCGA-ZF-A9R5-01	TCGA-ZF-A9R5	BLCA	59	MALE	WHITE	Stage III		Muscle invasive urothelial carcinoma (pT2 or above)	High Grade	2011		-21811	Alive	TUMOR FREE	1090							Complete Remission/Response			0	1090	0	1090	0	1090	0	1090
TCGA-ZF-A9R7-01	TCGA-ZF-A9R7	BLCA	76	FEMALE	WHITE	Stage II		Muscle invasive urothelial carcinoma (pT2 or above)	High Grade	2011		-28063	Alive	TUMOR FREE	665							Complete Remission/Response			0	665	0	665	0	665	0	665
TCGA-ZF-A9R9-01	TCGA-ZF-A9R9	BLCA	58	MALE	WHITE	Stage IV		Muscle invasive urothelial carcinoma (pT2 or above)	High Grade	2010		-21491	Dead	WITH TUMOR		864		Distant Metastasis	Other, specify	penis	629	Complete Remission/Response			1	864	1	864			1	629
TCGA-ZF-A9RC-01	TCGA-ZF-A9RC	BLCA	77	MALE	WHITE	Stage III		Muscle invasive urothelial carcinoma (pT2 or above)	High Grade	2007		-28275	Alive	TUMOR FREE	2868							Complete Remission/Response			0	2868	0	2868	0	2868	0	2868
TCGA-ZF-A9RD-01	TCGA-ZF-A9RD	BLCA	75	FEMALE	WHITE	Stage IV		Muscle invasive urothelial carcinoma (pT2 or above)	High Grade	2008		-27496	Dead			408						[Unknown]			1	408		408			0	408
TCGA-ZF-A9RE-01	TCGA-ZF-A9RE	BLCA	78	FEMALE	WHITE	Stage II		Muscle invasive urothelial carcinoma (pT2 or above)	High Grade	2010		-28622	Dead	WITH TUMOR		106						Progressive Disease			1	106	1	106			1	106
TCGA-ZF-A9RF-01	TCGA-ZF-A9RF	BLCA	74	MALE	WHITE	Stage II		Muscle invasive urothelial carcinoma (pT2 or above)	High Grade	2009		-27281	Alive	TUMOR FREE	1949			Locoregional (Urothelial tumor event)	Bladder		1565	Complete Remission/Response			0	1949	0	1949	1	1565	1	1565
TCGA-ZF-A9RG-01	TCGA-ZF-A9RG	BLCA	70	FEMALE	WHITE	Stage III		Muscle invasive urothelial carcinoma (pT2 or above)	High Grade	2010		-25656	Alive	WITH TUMOR	1786			Distant Metastasis	Other, specify	neck lymph node	440	Complete Remission/Response			0	1786	0	1786	1	440	1	440
TCGA-ZF-A9RL-01	TCGA-ZF-A9RL	BLCA	61	MALE	WHITE	Stage II		Muscle invasive urothelial carcinoma (pT2 or above)	High Grade	2007		-22480	Alive	TUMOR FREE	2703			Locoregional (Urothelial tumor event)	Bladder		1064	Complete Remission/Response			0	2703	0	2703	1	1064	1	1064
TCGA-ZF-A9RM-01	TCGA-ZF-A9RM	BLCA	70	MALE	WHITE	Stage II		Muscle invasive urothelial carcinoma (pT2 or above)	High Grade	2010		-25642	Alive	TUMOR FREE	1455							Complete Remission/Response			0	1455	0	1455	0	1455	0	1455
TCGA-ZF-A9RN-01	TCGA-ZF-A9RN	BLCA	67	FEMALE	WHITE	Stage III		Muscle invasive urothelial carcinoma (pT2 or above)	High Grade	2010		-24795	Dead	WITH TUMOR		615		Distant Metastasis	Lung		516	Partial Remission/Response			1	615	1	615			1	516
TCGA-ZF-AA4N-01	TCGA-ZF-AA4N	BLCA	74	MALE	WHITE	Stage II			High Grade	2011		-27056	Dead	WITH TUMOR		88						Progressive Disease			1	88	1	88			1	88
TCGA-ZF-AA4R-01	TCGA-ZF-AA4R	BLCA	67	MALE	WHITE	Stage IV		Muscle invasive urothelial carcinoma (pT2 or above)	High Grade	2008		-24537	Dead	WITH TUMOR		1036		Locoregional (Urothelial tumor event)	Lymph Node Only		750	[Unknown]			1	1036	1	1036			1	750
TCGA-ZF-AA4T-01	TCGA-ZF-AA4T	BLCA	65	MALE	WHITE	Stage IV		Muscle invasive urothelial carcinoma (pT2 or above)	High Grade	2008		-23974	Dead	WITH TUMOR		599		Distant Metastasis	Lung		511	[Unknown]			1	599	1	599			1	511
TCGA-ZF-AA4U-01	TCGA-ZF-AA4U	BLCA	70	MALE	WHITE	Stage III		Muscle invasive urothelial carcinoma (pT2 or above)	High Grade	2008		-25682	Dead	WITH TUMOR		262		Distant Metastasis	Bone		199	Progressive Disease			1	262	1	262			1	199
TCGA-ZF-AA4V-01	TCGA-ZF-AA4V	BLCA	66	MALE	WHITE	Stage III		Muscle invasive urothelial carcinoma (pT2 or above)	High Grade	2008		-24448	Alive	TUMOR FREE	1806							Complete Remission/Response			0	1806	0	1806	0	1806	0	1806
TCGA-ZF-AA4W-01	TCGA-ZF-AA4W	BLCA	56	MALE	WHITE	Stage III		Muscle invasive urothelial carcinoma (pT2 or above)	High Grade	2009		-20611	Alive		1830			Locoregional (Urothelial tumor event)	Other, specify	penile urethra	1679	Complete Remission/Response			0	1830	0	1830	1	1679	1	1679
TCGA-ZF-AA4X-01	TCGA-ZF-AA4X	BLCA	56	MALE	WHITE	Stage II		Muscle invasive urothelial carcinoma (pT2 or above)	High Grade	2009		-20579	Alive	WITH TUMOR	2044			Locoregional (Urothelial tumor event)	Bladder		1665	Complete Remission/Response			0	2044	0	2044	1	1665	1	1665
TCGA-ZF-AA51-01	TCGA-ZF-AA51	BLCA	69	FEMALE	WHITE	Stage II		Muscle invasive urothelial carcinoma (pT2 or above)	High Grade	2009		-25484	Alive	TUMOR FREE	1714							Complete Remission/Response			0	1714	0	1714	0	1714	0	1714
TCGA-ZF-AA52-01	TCGA-ZF-AA52	BLCA	70	MALE	WHITE	Stage III		Muscle invasive urothelial carcinoma (pT2 or above)	High Grade	2009		-25579	Dead			1077						Partial Remission/Response			1	1077		1077			0	1077
TCGA-ZF-AA53-01	TCGA-ZF-AA53	BLCA	60	MALE	WHITE	Stage II		Muscle invasive urothelial carcinoma (pT2 or above)	High Grade	2010		-22035	Alive	TUMOR FREE	1761							Complete Remission/Response			0	1761	0	1761	0	1761	0	1761
TCGA-ZF-AA54-01	TCGA-ZF-AA54	BLCA	71	MALE	WHITE	Stage III		Muscle invasive urothelial carcinoma (pT2 or above)	High Grade	2009		-26128	Dead			590						[Unknown]			1	590		590			0	590
TCGA-ZF-AA56-01	TCGA-ZF-AA56	BLCA	79	FEMALE	WHITE	Stage III		Muscle invasive urothelial carcinoma (pT2 or above)	High Grade	2010		-28937	Dead	WITH TUMOR		259		Distant Metastasis	Liver		248	Progressive Disease			1	259	1	259			1	248
TCGA-ZF-AA58-01	TCGA-ZF-AA58	BLCA	61	FEMALE	WHITE	Stage IV		Muscle invasive urothelial carcinoma (pT2 or above)	High Grade	2010		-22549	Alive	TUMOR FREE	1649							Complete Remission/Response			0	1649	0	1649			0	1649
TCGA-ZF-AA5H-01	TCGA-ZF-AA5H	BLCA	60	FEMALE	WHITE	Stage IV		Muscle invasive urothelial carcinoma (pT2 or above)	High Grade	2012		-22122	Alive	WITH TUMOR	897			Locoregional (Urothelial tumor event)	Other, specify	peritoneum	177	Stable Disease			0	897	0	897			1	177
TCGA-ZF-AA5N-01	TCGA-ZF-AA5N	BLCA	62	FEMALE	WHITE	Stage IV		Muscle invasive urothelial carcinoma (pT2 or above)	High Grade	2013		-22741	Dead	WITH TUMOR		168						Progressive Disease			1	168	1	168			1	168
TCGA-ZF-AA5P-01	TCGA-ZF-AA5P	BLCA	65	MALE	WHITE	Stage IV		Muscle invasive urothelial carcinoma (pT2 or above)	High Grade	2013		-23971	Alive	TUMOR FREE	372							Complete Remission/Response			0	372	0	372			0	372
TCGA-3C-AAAU-01	TCGA-3C-AAAU	BRCA	55	FEMALE	WHITE	Stage X		Infiltrating Lobular Carcinoma		2004	Pre (<6 months since LMP AND no prior bilateral ovariectomy AND not on estrogen replacement)	-20211	Alive	WITH TUMOR	4047			Distant Metastasis	Lung		1808		Negative		0	4047	0	4047	1	1808	1	1808
TCGA-3C-AALI-01	TCGA-3C-AALI	BRCA	50	FEMALE	BLACK OR AFRICAN AMERICAN	Stage IIB		Infiltrating Ductal Carcinoma		2003	Post (prior bilateral ovariectomy OR >12 mo since LMP with no prior hysterectomy)	-18538	Alive	TUMOR FREE	4005								Negative		0	4005	0	4005	0	4005	0	4005
TCGA-3C-AALJ-01	TCGA-3C-AALJ	BRCA	62	FEMALE	BLACK OR AFRICAN AMERICAN	Stage IIB		Infiltrating Ductal Carcinoma		2011	Post (prior bilateral ovariectomy OR >12 mo since LMP with no prior hysterectomy)	-22848	Alive	TUMOR FREE	1474								Negative		0	1474	0	1474	0	1474	0	1474
TCGA-3C-AALK-01	TCGA-3C-AALK	BRCA	52	FEMALE	BLACK OR AFRICAN AMERICAN	Stage IA		Infiltrating Ductal Carcinoma		2011	[Unknown]	-19074	Alive	TUMOR FREE	1448								Close		0	1448	0	1448			0	1448
TCGA-4H-AAAK-01	TCGA-4H-AAAK	BRCA	50	FEMALE	WHITE	Stage IIIA		Infiltrating Lobular Carcinoma		2013	Post (prior bilateral ovariectomy OR >12 mo since LMP with no prior hysterectomy)	-18371	Alive	TUMOR FREE	348								Negative		0	348	0	348	0	348	0	348
TCGA-5L-AAT0-01	TCGA-5L-AAT0	BRCA	42	FEMALE	WHITE	Stage IIA		Infiltrating Lobular Carcinoma		2010	Post (prior bilateral ovariectomy OR >12 mo since LMP with no prior hysterectomy)	-15393	Alive	TUMOR FREE	1477								Positive		0	1477	0	1477			0	1477
TCGA-5L-AAT1-01	TCGA-5L-AAT1	BRCA	63	FEMALE	WHITE	Stage IV		Infiltrating Lobular Carcinoma		2010	Post (prior bilateral ovariectomy OR >12 mo since LMP with no prior hysterectomy)	-23225	Alive	WITH TUMOR	1471								Negative		0	1471	0	1471			0	1471
TCGA-5T-A9QA-01	TCGA-5T-A9QA	BRCA	52	FEMALE	BLACK OR AFRICAN AMERICAN	Stage IIA		Other, specify		2013	[Unknown]	-19031	Alive		303								[Unknown]		0	303	0	303			0	303
TCGA-A1-A0SB-01	TCGA-A1-A0SB	BRCA	70	FEMALE	WHITE	Stage I		Other, specify		2008	Post (prior bilateral ovariectomy OR >12 mo since LMP with no prior hysterectomy)	-25833	Alive	TUMOR FREE	259								Negative		0	259	0	259	0	259	0	259
TCGA-A1-A0SD-01	TCGA-A1-A0SD	BRCA	59	FEMALE	WHITE	Stage IIA		Infiltrating Ductal Carcinoma		2005		-21793	Alive		437								Negative		0	437	0	437	0	437	0	437
TCGA-A1-A0SE-01	TCGA-A1-A0SE	BRCA	56	FEMALE	WHITE	Stage I		Mixed Histology (please specify)		2005	Pre (<6 months since LMP AND no prior bilateral ovariectomy AND not on estrogen replacement)	-20717	Alive	TUMOR FREE	1321								Negative		0	1321	0	1321	0	1321	0	1321
TCGA-A1-A0SF-01	TCGA-A1-A0SF	BRCA	54	FEMALE	WHITE	Stage IIA		Infiltrating Ductal Carcinoma		2006	Pre (<6 months since LMP AND no prior bilateral ovariectomy AND not on estrogen replacement)	-19731	Alive	TUMOR FREE	1463								Negative		0	1463	0	1463	0	1463	0	1463
TCGA-A1-A0SG-01	TCGA-A1-A0SG	BRCA	61	FEMALE	WHITE	Stage IIB		Other, specify		2006	Post (prior bilateral ovariectomy OR >12 mo since LMP with no prior hysterectomy)	-22380	Alive		434								Negative		0	434	0	434	0	434	0	434
TCGA-A1-A0SH-01	TCGA-A1-A0SH	BRCA	39	FEMALE	WHITE	Stage IIA		Infiltrating Ductal Carcinoma		2006	Pre (<6 months since LMP AND no prior bilateral ovariectomy AND not on estrogen replacement)	-14595	Alive	TUMOR FREE	1437								Negative		0	1437	0	1437	0	1437	0	1437
TCGA-A1-A0SI-01	TCGA-A1-A0SI	BRCA	52	FEMALE	WHITE	Stage IIB		Infiltrating Ductal Carcinoma		2007		-19250	Alive	TUMOR FREE	635								Negative		0	635	0	635	0	635	0	635
TCGA-A1-A0SJ-01	TCGA-A1-A0SJ	BRCA	39	FEMALE	BLACK OR AFRICAN AMERICAN	Stage IIIA		Infiltrating Ductal Carcinoma		2006		-14383	Alive	TUMOR FREE	416								Negative		0	416	0	416	0	416	0	416
TCGA-A1-A0SK-01	TCGA-A1-A0SK	BRCA	54	FEMALE	ASIAN	Stage IIA		Other, specify		2007	Indeterminate (neither Pre or Postmenopausal)	-20048	Dead	WITH TUMOR		967							Negative		1	967	1	967			1	967
TCGA-A1-A0SM-01	TCGA-A1-A0SM	BRCA	77	MALE	WHITE	Stage IIA		Infiltrating Ductal Carcinoma		2007		-28198	Alive	TUMOR FREE	242								Negative		0	242	0	242	0	242	0	242
TCGA-A1-A0SN-01	TCGA-A1-A0SN	BRCA	50	FEMALE	WHITE	Stage IIA		Infiltrating Ductal Carcinoma		2007	Post (prior bilateral ovariectomy OR >12 mo since LMP with no prior hysterectomy)	-18401	Alive	TUMOR FREE	1196								Negative		0	1196	0	1196	0	1196	0	1196
TCGA-A1-A0SO-01	TCGA-A1-A0SO	BRCA	67	FEMALE	WHITE	Stage IIB		Infiltrating Ductal Carcinoma		2007	Post (prior bilateral ovariectomy OR >12 mo since LMP with no prior hysterectomy)	-24826	Alive	TUMOR FREE	852								Negative		0	852	0	852	0	852	0	852
TCGA-A1-A0SP-01	TCGA-A1-A0SP	BRCA	40	FEMALE		Stage IIA		Infiltrating Ductal Carcinoma		2007		-14954	Alive	TUMOR FREE	584								Negative		0	584	0	584	0	584	0	584
TCGA-A1-A0SQ-01	TCGA-A1-A0SQ	BRCA	45	FEMALE	WHITE	Stage IIB		Infiltrating Ductal Carcinoma		2007	Pre (<6 months since LMP AND no prior bilateral ovariectomy AND not on estrogen replacement)	-16458	Alive	TUMOR FREE	554								Negative		0	554	0	554	0	554	0	554
TCGA-A2-A04N-01	TCGA-A2-A04N	BRCA	66	FEMALE	WHITE	Stage IA		Infiltrating Ductal Carcinoma		2002	Post (prior bilateral ovariectomy OR >12 mo since LMP with no prior hysterectomy)	-24155	Alive	TUMOR FREE	4354								Negative		0	4354	0	4354	0	4354	0	4354
TCGA-A2-A04P-01	TCGA-A2-A04P	BRCA	36	FEMALE	BLACK OR AFRICAN AMERICAN	Stage IIIC		Infiltrating Ductal Carcinoma		2003	Pre (<6 months since LMP AND no prior bilateral ovariectomy AND not on estrogen replacement)	-13238	Dead	WITH TUMOR		548		Distant Metastasis	Bone		102		Positive		1	548	1	548			1	102
TCGA-A2-A04Q-01	TCGA-A2-A04Q	BRCA	48	FEMALE	WHITE	Stage IA		Infiltrating Ductal Carcinoma		2004	Post (prior bilateral ovariectomy OR >12 mo since LMP with no prior hysterectomy)	-17660	Alive	TUMOR FREE	2385								Negative		0	2385	0	2385	0	2385	0	2385
TCGA-A2-A04R-01	TCGA-A2-A04R	BRCA	36	FEMALE	BLACK OR AFRICAN AMERICAN	Stage IA		Infiltrating Ductal Carcinoma		2004	Pre (<6 months since LMP AND no prior bilateral ovariectomy AND not on estrogen replacement)	-13483	Alive	TUMOR FREE	3709								Negative		0	3709	0	3709	0	3709	0	3709
TCGA-A2-A04T-01	TCGA-A2-A04T	BRCA	62	FEMALE	WHITE	Stage IIA		Infiltrating Ductal Carcinoma		2004	Post (prior bilateral ovariectomy OR >12 mo since LMP with no prior hysterectomy)	-22707	Alive	TUMOR FREE	2246								Negative		0	2246	0	2246	0	2246	0	2246
TCGA-A2-A04U-01	TCGA-A2-A04U	BRCA	47	FEMALE	WHITE	Stage IIA		Infiltrating Ductal Carcinoma		2004	Peri (6-12 months since last menstrual period)	-17474	Alive	TUMOR FREE	2654								Negative		0	2654	0	2654	0	2654	0	2654
TCGA-A2-A04V-01	TCGA-A2-A04V	BRCA	39	FEMALE	WHITE	Stage IIA		Infiltrating Ductal Carcinoma		2005	Pre (<6 months since LMP AND no prior bilateral ovariectomy AND not on estrogen replacement)	-14250	Dead	WITH TUMOR		1920					1470		Negative		1	1920	1	1920	1	1470	1	1470
TCGA-A2-A04W-01	TCGA-A2-A04W	BRCA	50	FEMALE	WHITE	Stage IIB		Other, specify		2005	Pre (<6 months since LMP AND no prior bilateral ovariectomy AND not on estrogen replacement)	-18345	Alive	TUMOR FREE	3102								Negative		0	3102	0	3102	0	3102	0	3102
TCGA-A2-A04X-01	TCGA-A2-A04X	BRCA	34	FEMALE	WHITE	Stage IIA		Infiltrating Ductal Carcinoma		2006	Pre (<6 months since LMP AND no prior bilateral ovariectomy AND not on estrogen replacement)	-12642	Alive	TUMOR FREE	1686								Negative		0	1686	0	1686	0	1686	0	1686
TCGA-A2-A04Y-01	TCGA-A2-A04Y	BRCA	53	FEMALE	WHITE	Stage IIB		Infiltrating Ductal Carcinoma		2008	Post (prior bilateral ovariectomy OR >12 mo since LMP with no prior hysterectomy)	-19533	Alive	TUMOR FREE	1099								Negative		0	1099	0	1099	0	1099	0	1099
TCGA-A2-A0CK-01	TCGA-A2-A0CK	BRCA	60	FEMALE	WHITE	Stage IIIA		Infiltrating Lobular Carcinoma		2001	Post (prior bilateral ovariectomy OR >12 mo since LMP with no prior hysterectomy)	-22094	Alive	TUMOR FREE	4159			New Primary Tumor	Other, specify	LEFT BREAST	1364		Negative		0	4159	0	4159	1	1364	1	1364
TCGA-A2-A0CL-01	TCGA-A2-A0CL	BRCA	37	FEMALE	BLACK OR AFRICAN AMERICAN	Stage IIIA		Infiltrating Ductal Carcinoma		2006	Pre (<6 months since LMP AND no prior bilateral ovariectomy AND not on estrogen replacement)	-13556	Alive	TUMOR FREE	3015								Positive		0	3015	0	3015			0	3015
TCGA-A2-A0CM-01	TCGA-A2-A0CM	BRCA	40	FEMALE	BLACK OR AFRICAN AMERICAN	Stage IIA		Infiltrating Ductal Carcinoma		2003	Pre (<6 months since LMP AND no prior bilateral ovariectomy AND not on estrogen replacement)	-14969	Dead	WITH TUMOR		754					382		Negative		1	754	1	754	1	382	1	382
TCGA-A2-A0CO-01	TCGA-A2-A0CO	BRCA	85	FEMALE	WHITE	Stage IIB		Infiltrating Lobular Carcinoma		2002	Post (prior bilateral ovariectomy OR >12 mo since LMP with no prior hysterectomy)	-31404	Dead	TUMOR FREE		3492							Positive		1	3492	0	3492			0	3492
TCGA-A2-A0CP-01	TCGA-A2-A0CP	BRCA	60	FEMALE	WHITE	Stage IA		Infiltrating Ductal Carcinoma		2003	Post (prior bilateral ovariectomy OR >12 mo since LMP with no prior hysterectomy)	-22133	Alive	TUMOR FREE	2813								Negative		0	2813	0	2813	0	2813	0	2813
TCGA-A2-A0CQ-01	TCGA-A2-A0CQ	BRCA	62	FEMALE	BLACK OR AFRICAN AMERICAN	Stage IA		Infiltrating Ductal Carcinoma		2003	Post (prior bilateral ovariectomy OR >12 mo since LMP with no prior hysterectomy)	-22810	Alive	TUMOR FREE	2695								Negative		0	2695	0	2695	0	2695	0	2695
TCGA-A2-A0CR-01	TCGA-A2-A0CR	BRCA	54	FEMALE	ASIAN	Stage IIB		Infiltrating Lobular Carcinoma		2004	Post (prior bilateral ovariectomy OR >12 mo since LMP with no prior hysterectomy)	-20075	Alive	TUMOR FREE	3283								Close		0	3283	0	3283			0	3283
TCGA-A2-A0CS-01	TCGA-A2-A0CS	BRCA	73	FEMALE	WHITE	Stage IV		Infiltrating Ductal Carcinoma		2004	Post (prior bilateral ovariectomy OR >12 mo since LMP with no prior hysterectomy)	-26817	Dead	TUMOR FREE		2348							Positive		1	2348	0	2348			0	2348
TCGA-A2-A0CT-01	TCGA-A2-A0CT	BRCA	71	FEMALE	WHITE	Stage IIA		Infiltrating Ductal Carcinoma		2005	Post (prior bilateral ovariectomy OR >12 mo since LMP with no prior hysterectomy)	-25959	Alive	TUMOR FREE	2289								Negative		0	2289	0	2289	0	2289	0	2289
TCGA-A2-A0CU-01	TCGA-A2-A0CU	BRCA	73	FEMALE	WHITE	Stage IIA		Infiltrating Ductal Carcinoma		2005	Post (prior bilateral ovariectomy OR >12 mo since LMP with no prior hysterectomy)	-26823	Dead	TUMOR FREE		158							Close		1	158	0	158			0	158
TCGA-A2-A0CV-01	TCGA-A2-A0CV	BRCA	41	FEMALE	ASIAN	Stage IIB		Infiltrating Ductal Carcinoma		2005	Post (prior bilateral ovariectomy OR >12 mo since LMP with no prior hysterectomy)	-15289	Alive	TUMOR FREE	3011								Negative		0	3011	0	3011	0	3011	0	3011
TCGA-A2-A0CW-01	TCGA-A2-A0CW	BRCA	67	FEMALE	WHITE	Stage IIB		Infiltrating Ductal Carcinoma		2006	Post (prior bilateral ovariectomy OR >12 mo since LMP with no prior hysterectomy)	-24541	Alive	TUMOR FREE	3283								Negative		0	3283	0	3283	0	3283	0	3283
TCGA-A2-A0CX-01	TCGA-A2-A0CX	BRCA	52	FEMALE	WHITE	Stage IIA		Infiltrating Ductal Carcinoma		2006	Pre (<6 months since LMP AND no prior bilateral ovariectomy AND not on estrogen replacement)	-19152	Alive	TUMOR FREE	1728								Negative		0	1728	0	1728	0	1728	0	1728
TCGA-A2-A0CY-01	TCGA-A2-A0CY	BRCA	63	FEMALE	WHITE	Stage IIB		Infiltrating Ductal Carcinoma		2006	Post (prior bilateral ovariectomy OR >12 mo since LMP with no prior hysterectomy)	-23229	Alive	TUMOR FREE	1673								Negative		0	1673	0	1673	0	1673	0	1673
TCGA-A2-A0CZ-01	TCGA-A2-A0CZ	BRCA	46	FEMALE	WHITE	Stage IIA		Infiltrating Ductal Carcinoma		2007	Peri (6-12 months since last menstrual period)	-17026	Alive	TUMOR FREE	1616								Positive		0	1616	0	1616			0	1616
TCGA-A2-A0D0-01	TCGA-A2-A0D0	BRCA	60	FEMALE	BLACK OR AFRICAN AMERICAN	Stage IIA		Infiltrating Ductal Carcinoma		2008	Post (prior bilateral ovariectomy OR >12 mo since LMP with no prior hysterectomy)	-22115	Alive	TUMOR FREE	2048								Negative		0	2048	0	2048	0	2048	0	2048
TCGA-A2-A0D1-01	TCGA-A2-A0D1	BRCA	76	FEMALE	WHITE	Stage IIA		Infiltrating Ductal Carcinoma		2008	Post (prior bilateral ovariectomy OR >12 mo since LMP with no prior hysterectomy)	-28084	Alive	TUMOR FREE	1051								Negative		0	1051	0	1051	0	1051	0	1051
TCGA-A2-A0D2-01	TCGA-A2-A0D2	BRCA	45	FEMALE	WHITE	Stage IIA		Infiltrating Ductal Carcinoma		2008	Pre (<6 months since LMP AND no prior bilateral ovariectomy AND not on estrogen replacement)	-16623	Alive	TUMOR FREE	1027								Negative		0	1027	0	1027	0	1027	0	1027
TCGA-A2-A0D3-01	TCGA-A2-A0D3	BRCA	42	FEMALE	WHITE	Stage IA		Infiltrating Ductal Carcinoma		2008	Post (prior bilateral ovariectomy OR >12 mo since LMP with no prior hysterectomy)	-15524	Alive	TUMOR FREE	1873								Negative		0	1873	0	1873	0	1873	0	1873
TCGA-A2-A0D4-01	TCGA-A2-A0D4	BRCA	37	FEMALE	BLACK OR AFRICAN AMERICAN	Stage IIB		Infiltrating Ductal Carcinoma		2009	Pre (<6 months since LMP AND no prior bilateral ovariectomy AND not on estrogen replacement)	-13805	Alive	TUMOR FREE	767								Negative		0	767	0	767	0	767	0	767
TCGA-A2-A0EM-01	TCGA-A2-A0EM	BRCA	73	FEMALE	WHITE	Stage IA		Infiltrating Ductal Carcinoma		2002	Post (prior bilateral ovariectomy OR >12 mo since LMP with no prior hysterectomy)	-26845	Alive	TUMOR FREE	3094								Negative		0	3094	0	3094	0	3094	0	3094
TCGA-A2-A0EN-01	TCGA-A2-A0EN	BRCA	70	FEMALE	WHITE	Stage IIA		Infiltrating Lobular Carcinoma		2003	Post (prior bilateral ovariectomy OR >12 mo since LMP with no prior hysterectomy)	-25771	Alive	TUMOR FREE	4088								Negative		0	4088	0	4088	0	4088	0	4088
TCGA-A2-A0EO-01	TCGA-A2-A0EO	BRCA	54	FEMALE	WHITE	Stage IA		Infiltrating Ductal Carcinoma		2003	Peri (6-12 months since last menstrual period)	-19880	Alive	TUMOR FREE	2442								Close		0	2442	0	2442			0	2442
TCGA-A2-A0EP-01	TCGA-A2-A0EP	BRCA	56	FEMALE	WHITE	Stage I		Infiltrating Lobular Carcinoma		2004	Post (prior bilateral ovariectomy OR >12 mo since LMP with no prior hysterectomy)	-20585	Alive	TUMOR FREE	3603								Negative		0	3603	0	3603	0	3603	0	3603
TCGA-A2-A0EQ-01	TCGA-A2-A0EQ	BRCA	64	FEMALE	BLACK OR AFRICAN AMERICAN	Stage IIA		Infiltrating Ductal Carcinoma		2004	Post (prior bilateral ovariectomy OR >12 mo since LMP with no prior hysterectomy)	-23543	Alive	TUMOR FREE	2426								Negative		0	2426	0	2426	0	2426	0	2426
TCGA-A2-A0ER-01	TCGA-A2-A0ER	BRCA	63	FEMALE	WHITE	Stage IB		Infiltrating Ductal Carcinoma		2005	Post (prior bilateral ovariectomy OR >12 mo since LMP with no prior hysterectomy)	-23021	Alive	TUMOR FREE	2263								Negative		0	2263	0	2263	0	2263	0	2263
TCGA-A2-A0ES-01	TCGA-A2-A0ES	BRCA	52	FEMALE	WHITE	Stage IIA		Infiltrating Lobular Carcinoma		2008	Post (prior bilateral ovariectomy OR >12 mo since LMP with no prior hysterectomy)	-19160	Alive	TUMOR FREE	2190								Negative		0	2190	0	2190	0	2190	0	2190
TCGA-A2-A0ET-01	TCGA-A2-A0ET	BRCA	58	FEMALE	WHITE	Stage IIIA		Infiltrating Ductal Carcinoma		2008	Post (prior bilateral ovariectomy OR >12 mo since LMP with no prior hysterectomy)	-21464	Alive	TUMOR FREE	1066								Negative		0	1066	0	1066	0	1066	0	1066
TCGA-A2-A0EU-01	TCGA-A2-A0EU	BRCA	79	FEMALE	WHITE	Stage IA		Infiltrating Ductal Carcinoma		2008	Post (prior bilateral ovariectomy OR >12 mo since LMP with no prior hysterectomy)	-29144	Alive	TUMOR FREE	1043								Negative		0	1043	0	1043	0	1043	0	1043
TCGA-A2-A0EV-01	TCGA-A2-A0EV	BRCA	80	FEMALE	WHITE	Stage IA		Infiltrating Ductal Carcinoma		2008	Post (prior bilateral ovariectomy OR >12 mo since LMP with no prior hysterectomy)	-29285	Alive	TUMOR FREE	968								Negative		0	968	0	968	0	968	0	968
TCGA-A2-A0EW-01	TCGA-A2-A0EW	BRCA	53	FEMALE	WHITE	Stage IIIC		Infiltrating Lobular Carcinoma		2008	Post (prior bilateral ovariectomy OR >12 mo since LMP with no prior hysterectomy)	-19413	Dead	WITH TUMOR		1884		Distant Metastasis	Bone		1353		Positive		1	1884	1	1884			1	1353
TCGA-A2-A0EX-01	TCGA-A2-A0EX	BRCA	46	FEMALE	WHITE	Stage IIB		Infiltrating Lobular Carcinoma		2009	Post (prior bilateral ovariectomy OR >12 mo since LMP with no prior hysterectomy)	-16858	Alive	TUMOR FREE	752								Negative		0	752	0	752	0	752	0	752
TCGA-A2-A0EY-01	TCGA-A2-A0EY	BRCA	62	FEMALE	WHITE	Stage IIB		Infiltrating Ductal Carcinoma		2009	Post (prior bilateral ovariectomy OR >12 mo since LMP with no prior hysterectomy)	-22872	Alive	TUMOR FREE	1925								Negative		0	1925	0	1925	0	1925	0	1925
TCGA-A2-A0ST-01	TCGA-A2-A0ST	BRCA	62	FEMALE	WHITE	Stage IIA		Infiltrating Ductal Carcinoma		2003	Post (prior bilateral ovariectomy OR >12 mo since LMP with no prior hysterectomy)	-22922	Alive	WITH TUMOR	3017								Negative		0	3017	0	3017	0	3017	0	3017
TCGA-A2-A0SU-01	TCGA-A2-A0SU	BRCA	66	FEMALE	WHITE	Stage IIA		Infiltrating Ductal Carcinoma		2006	Post (prior bilateral ovariectomy OR >12 mo since LMP with no prior hysterectomy)	-24219	Alive	TUMOR FREE	1662								Negative		0	1662	0	1662	0	1662	0	1662
TCGA-A2-A0SV-01	TCGA-A2-A0SV	BRCA	63	FEMALE	WHITE	Stage IV		Infiltrating Ductal Carcinoma		2006	Post (prior bilateral ovariectomy OR >12 mo since LMP with no prior hysterectomy)	-23126	Dead	WITH TUMOR		825							Positive		1	825	1	825			1	825
TCGA-A2-A0SW-01	TCGA-A2-A0SW	BRCA	82	FEMALE	WHITE	Stage IV		Infiltrating Ductal Carcinoma		2006	Post (prior bilateral ovariectomy OR >12 mo since LMP with no prior hysterectomy)	-30085	Dead	WITH TUMOR		1365					653		Negative		1	1365	1	1365			1	653
TCGA-A2-A0SX-01	TCGA-A2-A0SX	BRCA	48	FEMALE	WHITE	Stage IA		Infiltrating Ductal Carcinoma		2007	Pre (<6 months since LMP AND no prior bilateral ovariectomy AND not on estrogen replacement)	-17774	Alive	WITH TUMOR	1534						1239		Negative		0	1534	0	1534	1	1239	1	1239
TCGA-A2-A0SY-01	TCGA-A2-A0SY	BRCA	62	FEMALE	WHITE	Stage IIIA		Infiltrating Lobular Carcinoma		2007	Post (prior bilateral ovariectomy OR >12 mo since LMP with no prior hysterectomy)	-22928	Alive	TUMOR FREE	1347								Negative		0	1347	0	1347	0	1347	0	1347
TCGA-A2-A0T0-01	TCGA-A2-A0T0	BRCA	59	FEMALE	WHITE	Stage IIB		Infiltrating Ductal Carcinoma		2009	Post (prior bilateral ovariectomy OR >12 mo since LMP with no prior hysterectomy)	-21575	Alive	TUMOR FREE	533								Negative		0	533	0	533	0	533	0	533
TCGA-A2-A0T1-01	TCGA-A2-A0T1	BRCA	55	FEMALE	AMERICAN INDIAN OR ALASKA NATIVE	Stage IIIC		Infiltrating Ductal Carcinoma		2009	Post (prior bilateral ovariectomy OR >12 mo since LMP with no prior hysterectomy)	-20227	Alive	TUMOR FREE	521								Negative		0	521	0	521	0	521	0	521
TCGA-A2-A0T2-01	TCGA-A2-A0T2	BRCA	66	FEMALE	WHITE	Stage IV		Infiltrating Ductal Carcinoma		2009	Post (prior bilateral ovariectomy OR >12 mo since LMP with no prior hysterectomy)	-24235	Dead	WITH TUMOR		255							Close		1	255	1	255			1	255
TCGA-A2-A0T3-01	TCGA-A2-A0T3	BRCA	37	FEMALE	WHITE	Stage IB		Infiltrating Ductal Carcinoma		2009	Pre (<6 months since LMP AND no prior bilateral ovariectomy AND not on estrogen replacement)	-13680	Alive	TUMOR FREE	1516								Negative		0	1516	0	1516	0	1516	0	1516
TCGA-A2-A0T4-01	TCGA-A2-A0T4	BRCA	62	FEMALE	WHITE	Stage IIA		Infiltrating Lobular Carcinoma		2009	Post (prior bilateral ovariectomy OR >12 mo since LMP with no prior hysterectomy)	-22849	Alive	TUMOR FREE	624								Negative		0	624	0	624	0	624	0	624
TCGA-A2-A0T5-01	TCGA-A2-A0T5	BRCA	39	FEMALE	WHITE	Stage IIA		Infiltrating Ductal Carcinoma		2009	Pre (<6 months since LMP AND no prior bilateral ovariectomy AND not on estrogen replacement)	-14503	Alive	TUMOR FREE	531								Negative		0	531	0	531	0	531	0	531
TCGA-A2-A0T6-01	TCGA-A2-A0T6	BRCA	50	FEMALE	WHITE	Stage IIB		Infiltrating Lobular Carcinoma		2009	Pre (<6 months since LMP AND no prior bilateral ovariectomy AND not on estrogen replacement)	-18334	Alive	TUMOR FREE	575								Negative		0	575	0	575	0	575	0	575
TCGA-A2-A0T7-01	TCGA-A2-A0T7	BRCA	51	FEMALE	WHITE	Stage IIA		Infiltrating Ductal Carcinoma		2009	Pre (<6 months since LMP AND no prior bilateral ovariectomy AND not on estrogen replacement)	-18756	Alive	TUMOR FREE	631								Negative		0	631	0	631	0	631	0	631
TCGA-A2-A0YC-01	TCGA-A2-A0YC	BRCA	59	FEMALE	WHITE	Stage IIB		Infiltrating Ductal Carcinoma		2008	Post (prior bilateral ovariectomy OR >12 mo since LMP with no prior hysterectomy)	-21685	Alive	WITH TUMOR	990			Locoregional Disease			756		Close		0	990	0	990			1	756
TCGA-A2-A0YD-01	TCGA-A2-A0YD	BRCA	63	FEMALE	WHITE	Stage IIB		Infiltrating Lobular Carcinoma		2009	Post (prior bilateral ovariectomy OR >12 mo since LMP with no prior hysterectomy)	-23021	Alive	TUMOR FREE	769								Negative		0	769	0	769	0	769	0	769
TCGA-A2-A0YE-01	TCGA-A2-A0YE	BRCA	48	FEMALE	WHITE	Stage IIB		Infiltrating Ductal Carcinoma		2010	Post (prior bilateral ovariectomy OR >12 mo since LMP with no prior hysterectomy)	-17727	Alive	TUMOR FREE	554								Negative		0	554	0	554	0	554	0	554
TCGA-A2-A0YF-01	TCGA-A2-A0YF	BRCA	67	FEMALE	BLACK OR AFRICAN AMERICAN	Stage I		Infiltrating Ductal Carcinoma		2009	Post (prior bilateral ovariectomy OR >12 mo since LMP with no prior hysterectomy)	-24660	Alive	TUMOR FREE	1535								Negative		0	1535	0	1535	0	1535	0	1535
TCGA-A2-A0YG-01	TCGA-A2-A0YG	BRCA	63	FEMALE	WHITE	Stage IIIC		Infiltrating Ductal Carcinoma		2009	Post (prior bilateral ovariectomy OR >12 mo since LMP with no prior hysterectomy)	-23058	Alive	TUMOR FREE	666								Negative		0	666	0	666	0	666	0	666
TCGA-A2-A0YH-01	TCGA-A2-A0YH	BRCA	53	FEMALE	WHITE	Stage IIIA		Infiltrating Ductal Carcinoma		2009	Post (prior bilateral ovariectomy OR >12 mo since LMP with no prior hysterectomy)	-19596	Alive	TUMOR FREE	659								Negative		0	659	0	659	0	659	0	659
TCGA-A2-A0YI-01	TCGA-A2-A0YI	BRCA	62	FEMALE	WHITE	Stage I		Infiltrating Ductal Carcinoma		2009	Post (prior bilateral ovariectomy OR >12 mo since LMP with no prior hysterectomy)	-22961	Alive	TUMOR FREE	1505								Negative		0	1505	0	1505	0	1505	0	1505
TCGA-A2-A0YJ-01	TCGA-A2-A0YJ	BRCA	39	FEMALE	WHITE	Stage IIIA		Infiltrating Ductal Carcinoma		2010	Pre (<6 months since LMP AND no prior bilateral ovariectomy AND not on estrogen replacement)	-14448	Alive	WITH TUMOR	566			Distant Metastasis	Other, specify	Left Cervical Lymph Node	559		Negative		0	566	0	566	1	559	1	559
TCGA-A2-A0YK-01	TCGA-A2-A0YK	BRCA	61	FEMALE	WHITE	Stage IIA		Infiltrating Lobular Carcinoma		2009	Post (prior bilateral ovariectomy OR >12 mo since LMP with no prior hysterectomy)	-22625	Alive	TUMOR FREE	588								Close		0	588	0	588			0	588
TCGA-A2-A0YL-01	TCGA-A2-A0YL	BRCA	48	FEMALE	WHITE	Stage IIIA		Infiltrating Lobular Carcinoma		2010	Pre (<6 months since LMP AND no prior bilateral ovariectomy AND not on estrogen replacement)	-17702	Alive	TUMOR FREE	1474								Negative		0	1474	0	1474	0	1474	0	1474
TCGA-A2-A0YM-01	TCGA-A2-A0YM	BRCA	67	FEMALE	WHITE	Stage IIA		Infiltrating Ductal Carcinoma		2008	Post (prior bilateral ovariectomy OR >12 mo since LMP with no prior hysterectomy)	-24831	Alive	TUMOR FREE	965								Negative		0	965	0	965	0	965	0	965
TCGA-A2-A0YT-01	TCGA-A2-A0YT	BRCA	56	FEMALE	WHITE	Stage IIIB		Infiltrating Ductal Carcinoma		2008	Post (prior bilateral ovariectomy OR >12 mo since LMP with no prior hysterectomy)	-20482	Dead	TUMOR FREE		723							Negative		1	723	0	723	0	723	0	723
TCGA-A2-A1FV-01	TCGA-A2-A1FV	BRCA	74	FEMALE	WHITE	Stage IIB		Infiltrating Lobular Carcinoma		2010	Post (prior bilateral ovariectomy OR >12 mo since LMP with no prior hysterectomy)	-27287	Alive	TUMOR FREE	714								Negative		0	714	0	714	0	714	0	714
TCGA-A2-A1FW-01	TCGA-A2-A1FW	BRCA	62	FEMALE	WHITE	Stage IIIA		Infiltrating Ductal Carcinoma		2010	Post (prior bilateral ovariectomy OR >12 mo since LMP with no prior hysterectomy)	-22779	Alive	TUMOR FREE	528								Negative		0	528	0	528	0	528	0	528
TCGA-A2-A1FX-01	TCGA-A2-A1FX	BRCA	61	FEMALE	WHITE	Stage IIIA		Infiltrating Ductal Carcinoma		2008	Post (prior bilateral ovariectomy OR >12 mo since LMP with no prior hysterectomy)	-22344	Alive	TUMOR FREE	1847								Negative		0	1847	0	1847	0	1847	0	1847
TCGA-A2-A1FZ-01	TCGA-A2-A1FZ	BRCA	63	FEMALE	WHITE	Stage IIA		Infiltrating Ductal Carcinoma		2010	Post (prior bilateral ovariectomy OR >12 mo since LMP with no prior hysterectomy)	-23055	Alive	TUMOR FREE	683								Negative		0	683	0	683	0	683	0	683
TCGA-A2-A1G0-01	TCGA-A2-A1G0	BRCA	49	FEMALE	WHITE	Stage IIB		Other, specify		2010	Pre (<6 months since LMP AND no prior bilateral ovariectomy AND not on estrogen replacement)	-18002	Alive	TUMOR FREE	616								Negative		0	616	0	616	0	616	0	616
TCGA-A2-A1G1-01	TCGA-A2-A1G1	BRCA	85	FEMALE	WHITE	Stage IIB		Infiltrating Ductal Carcinoma		2010	Post (prior bilateral ovariectomy OR >12 mo since LMP with no prior hysterectomy)	-31223	Alive	TUMOR FREE	584								Negative		0	584	0	584	0	584	0	584
TCGA-A2-A1G4-01	TCGA-A2-A1G4	BRCA	71	FEMALE	WHITE	Stage IIIA		Infiltrating Ductal Carcinoma		2010	Post (prior bilateral ovariectomy OR >12 mo since LMP with no prior hysterectomy)	-25966	Alive	TUMOR FREE	595								Negative		0	595	0	595	0	595	0	595
TCGA-A2-A1G6-01	TCGA-A2-A1G6	BRCA	50	FEMALE	WHITE	Stage IIIA		Infiltrating Ductal Carcinoma		2010	Pre (<6 months since LMP AND no prior bilateral ovariectomy AND not on estrogen replacement)	-18514	Alive	TUMOR FREE	501								Negative		0	501	0	501	0	501	0	501
TCGA-A2-A259-01	TCGA-A2-A259	BRCA	70	FEMALE	BLACK OR AFRICAN AMERICAN	Stage I		Infiltrating Ductal Carcinoma		2007	Post (prior bilateral ovariectomy OR >12 mo since LMP with no prior hysterectomy)	-25666	Alive	TUMOR FREE	1596								Close		0	1596	0	1596			0	1596
TCGA-A2-A25A-01	TCGA-A2-A25A	BRCA	44	FEMALE	WHITE	Stage IIA		Infiltrating Lobular Carcinoma		2003	Pre (<6 months since LMP AND no prior bilateral ovariectomy AND not on estrogen replacement)	-16084	Alive	TUMOR FREE	3276								Negative		0	3276	0	3276	0	3276	0	3276
TCGA-A2-A25B-01	TCGA-A2-A25B	BRCA	39	FEMALE	BLACK OR AFRICAN AMERICAN	Stage IIB		Infiltrating Ductal Carcinoma		2010	Pre (<6 months since LMP AND no prior bilateral ovariectomy AND not on estrogen replacement)	-14454	Alive	WITH TUMOR	1291			Distant Metastasis	Bone		1290		Close		0	1291	0	1291			1	1290
TCGA-A2-A25C-01	TCGA-A2-A25C	BRCA	50	FEMALE	WHITE	Stage IIB		Infiltrating Ductal Carcinoma		2010	Pre (<6 months since LMP AND no prior bilateral ovariectomy AND not on estrogen replacement)	-18508	Alive	TUMOR FREE	523								Negative		0	523	0	523	0	523	0	523
TCGA-A2-A25D-01	TCGA-A2-A25D	BRCA	90	FEMALE	WHITE	Stage IIIC		Infiltrating Lobular Carcinoma		2010	Post (prior bilateral ovariectomy OR >12 mo since LMP with no prior hysterectomy)	-32872	Alive	TUMOR FREE	552								Positive		0	552	0	552			0	552
TCGA-A2-A25E-01	TCGA-A2-A25E	BRCA	34	FEMALE	BLACK OR AFRICAN AMERICAN	Stage IIIA		Infiltrating Ductal Carcinoma		2004	Pre (<6 months since LMP AND no prior bilateral ovariectomy AND not on estrogen replacement)	-12601	Alive	TUMOR FREE	3204			Locoregional Recurrence	Other, specify	Left Chest Wall	2989		Negative		0	3204	0	3204	1	2989	1	2989
TCGA-A2-A25F-01	TCGA-A2-A25F	BRCA	66	FEMALE	WHITE	Stage IIA		Infiltrating Ductal Carcinoma		2011	Post (prior bilateral ovariectomy OR >12 mo since LMP with no prior hysterectomy)	-24319	Alive	TUMOR FREE	322								Negative		0	322	0	322	0	322	0	322
TCGA-A2-A3KC-01	TCGA-A2-A3KC	BRCA	55	FEMALE	BLACK OR AFRICAN AMERICAN	Stage IIB		Infiltrating Lobular Carcinoma		2011	Pre (<6 months since LMP AND no prior bilateral ovariectomy AND not on estrogen replacement)	-20401	Alive	TUMOR FREE	1102								Negative		0	1102	0	1102	0	1102	0	1102
TCGA-A2-A3KD-01	TCGA-A2-A3KD	BRCA	47	FEMALE	WHITE	Stage IIIA		Mucinous Carcinoma		2010	Pre (<6 months since LMP AND no prior bilateral ovariectomy AND not on estrogen replacement)	-17372	Alive	TUMOR FREE	1206								Positive		0	1206	0	1206			0	1206
TCGA-A2-A3XS-01	TCGA-A2-A3XS	BRCA	62	FEMALE	BLACK OR AFRICAN AMERICAN	Stage IIIA		Infiltrating Ductal Carcinoma		2003	Post (prior bilateral ovariectomy OR >12 mo since LMP with no prior hysterectomy)	-23000	Dead	WITH TUMOR		1032		Distant Metastasis	Lung		682		Negative		1	1032	1	1032	1	682	1	682
TCGA-A2-A3XT-01	TCGA-A2-A3XT	BRCA	45	FEMALE	BLACK OR AFRICAN AMERICAN	Stage IIB		Infiltrating Ductal Carcinoma		2006	Pre (<6 months since LMP AND no prior bilateral ovariectomy AND not on estrogen replacement)	-16649	Alive	TUMOR FREE	2770								Negative		0	2770	0	2770	0	2770	0	2770
TCGA-A2-A3XU-01	TCGA-A2-A3XU	BRCA	35	FEMALE	BLACK OR AFRICAN AMERICAN	Stage IIB		Infiltrating Ductal Carcinoma		2006	Post (prior bilateral ovariectomy OR >12 mo since LMP with no prior hysterectomy)	-13046	Dead	WITH TUMOR		912		Distant Metastasis	Bone		574		Negative		1	912	1	912	1	574	1	574
TCGA-A2-A3XV-01	TCGA-A2-A3XV	BRCA	46	FEMALE	BLACK OR AFRICAN AMERICAN	Stage IIA		Infiltrating Ductal Carcinoma		2011	Pre (<6 months since LMP AND no prior bilateral ovariectomy AND not on estrogen replacement)	-16971	Alive	TUMOR FREE	996								Negative		0	996	0	996	0	996	0	996
TCGA-A2-A3XW-01	TCGA-A2-A3XW	BRCA	42	FEMALE	BLACK OR AFRICAN AMERICAN	Stage IIB		Infiltrating Ductal Carcinoma		2009	Pre (<6 months since LMP AND no prior bilateral ovariectomy AND not on estrogen replacement)	-15670	Alive	TUMOR FREE	1712								Negative		0	1712	0	1712	0	1712	0	1712
TCGA-A2-A3XX-01	TCGA-A2-A3XX	BRCA	49	FEMALE	BLACK OR AFRICAN AMERICAN	Stage IIA		Infiltrating Ductal Carcinoma		2009	Post (prior bilateral ovariectomy OR >12 mo since LMP with no prior hysterectomy)	-17981	Dead	TUMOR FREE		1439							Negative		1	1439	0	1439	0	1439	0	1439
TCGA-A2-A3XY-01	TCGA-A2-A3XY	BRCA	49	FEMALE	BLACK OR AFRICAN AMERICAN	Stage IIB		Infiltrating Ductal Carcinoma		2010	Post (prior bilateral ovariectomy OR >12 mo since LMP with no prior hysterectomy)	-18059	Dead	WITH TUMOR		1093		Distant Metastasis	Lung		802		Negative		1	1093	1	1093	1	802	1	802
TCGA-A2-A3XZ-01	TCGA-A2-A3XZ	BRCA	46	FEMALE	BLACK OR AFRICAN AMERICAN	Stage I		Infiltrating Ductal Carcinoma		2009	Pre (<6 months since LMP AND no prior bilateral ovariectomy AND not on estrogen replacement)	-16978	Alive	TUMOR FREE	1532								Negative		0	1532	0	1532	0	1532	0	1532
TCGA-A2-A3Y0-01	TCGA-A2-A3Y0	BRCA	57	FEMALE	BLACK OR AFRICAN AMERICAN	Stage IIB		Infiltrating Ductal Carcinoma		2010	Post (prior bilateral ovariectomy OR >12 mo since LMP with no prior hysterectomy)	-21024	Alive	TUMOR FREE	1546								Close		0	1546	0	1546			0	1546
TCGA-A2-A4RW-01	TCGA-A2-A4RW	BRCA	49	FEMALE	WHITE	Stage IIIC		Infiltrating Lobular Carcinoma		2011	Pre (<6 months since LMP AND no prior bilateral ovariectomy AND not on estrogen replacement)	-18060	Alive	TUMOR FREE	222								Negative		0	222	0	222	0	222	0	222
TCGA-A2-A4RX-01	TCGA-A2-A4RX	BRCA	67	FEMALE	BLACK OR AFRICAN AMERICAN	Stage IIA		Metaplastic Carcinoma		2012	Post (prior bilateral ovariectomy OR >12 mo since LMP with no prior hysterectomy)	-24779	Alive	TUMOR FREE	742								Negative		0	742	0	742	0	742	0	742
TCGA-A2-A4RY-01	TCGA-A2-A4RY	BRCA	46	FEMALE	WHITE	Stage IIIC		Infiltrating Lobular Carcinoma		2012	Pre (<6 months since LMP AND no prior bilateral ovariectomy AND not on estrogen replacement)	-17157	Alive	TUMOR FREE	648								Negative		0	648	0	648	0	648	0	648
TCGA-A2-A4S0-01	TCGA-A2-A4S0	BRCA	77	FEMALE	WHITE	Stage IIA		Mucinous Carcinoma		2012	Post (prior bilateral ovariectomy OR >12 mo since LMP with no prior hysterectomy)	-28416	Alive	TUMOR FREE	706								Negative		0	706	0	706	0	706	0	706
TCGA-A2-A4S1-01	TCGA-A2-A4S1	BRCA	66	FEMALE	WHITE	Stage IIA		Metaplastic Carcinoma		2012	Post (prior bilateral ovariectomy OR >12 mo since LMP with no prior hysterectomy)	-24353	Alive	TUMOR FREE	820								Negative		0	820	0	820	0	820	0	820
TCGA-A2-A4S2-01	TCGA-A2-A4S2	BRCA	62	FEMALE	WHITE	Stage IIIA		Infiltrating Lobular Carcinoma		2012	Post (prior bilateral ovariectomy OR >12 mo since LMP with no prior hysterectomy)	-22936	Alive	TUMOR FREE	643								Negative		0	643	0	643	0	643	0	643
TCGA-A2-A4S3-01	TCGA-A2-A4S3	BRCA	59	FEMALE	BLACK OR AFRICAN AMERICAN	Stage IIB		Infiltrating Ductal Carcinoma		2012	Post (prior bilateral ovariectomy OR >12 mo since LMP with no prior hysterectomy)	-21762	Alive	TUMOR FREE	666								Negative		0	666	0	666	0	666	0	666
TCGA-A7-A0CD-01	TCGA-A7-A0CD	BRCA	66	FEMALE	WHITE	Stage I		Infiltrating Ductal Carcinoma		2009	Indeterminate (neither Pre or Postmenopausal)	-24242	Alive	TUMOR FREE	1165								Negative		0	1165	0	1165	0	1165	0	1165
TCGA-A7-A0CE-01	TCGA-A7-A0CE	BRCA	57	FEMALE	WHITE	Stage IIA		Infiltrating Ductal Carcinoma		2009	Indeterminate (neither Pre or Postmenopausal)	-20863	Alive	TUMOR FREE	1074								Negative		0	1074	0	1074	0	1074	0	1074
TCGA-A7-A0CE-11	TCGA-A7-A0CE	BRCA	57	FEMALE	WHITE	Stage IIA		Infiltrating Ductal Carcinoma		2009	Indeterminate (neither Pre or Postmenopausal)	-20863	Alive	TUMOR FREE	1074								Negative		0	1074	0	1074	0	1074	0	1074
TCGA-A7-A0CG-01	TCGA-A7-A0CG	BRCA	78	FEMALE	WHITE	Stage IIA		Mixed Histology (please specify)		2010	Post (prior bilateral ovariectomy OR >12 mo since LMP with no prior hysterectomy)	-28596	Alive	TUMOR FREE	1043								Close		0	1043	0	1043			0	1043
TCGA-A7-A0CH-01	TCGA-A7-A0CH	BRCA	79	FEMALE	WHITE	Stage IIA		Infiltrating Ductal Carcinoma		2009	Post (prior bilateral ovariectomy OR >12 mo since LMP with no prior hysterectomy)	-29104	Alive	TUMOR FREE	1079								Negative		0	1079	0	1079	0	1079	0	1079
TCGA-A7-A0CH-11	TCGA-A7-A0CH	BRCA	79	FEMALE	WHITE	Stage IIA		Infiltrating Ductal Carcinoma		2009	Post (prior bilateral ovariectomy OR >12 mo since LMP with no prior hysterectomy)	-29104	Alive	TUMOR FREE	1079								Negative		0	1079	0	1079	0	1079	0	1079
TCGA-A7-A0CJ-01	TCGA-A7-A0CJ	BRCA	57	FEMALE	WHITE	Stage IIA		Infiltrating Ductal Carcinoma		2010	Post (prior bilateral ovariectomy OR >12 mo since LMP with no prior hysterectomy)	-21014	Alive	TUMOR FREE	931								Positive		0	931	0	931			0	931
TCGA-A7-A0D9-01	TCGA-A7-A0D9	BRCA	37	FEMALE	WHITE	Stage IIA		Infiltrating Ductal Carcinoma		2009	Pre (<6 months since LMP AND no prior bilateral ovariectomy AND not on estrogen replacement)	-13836	Alive	TUMOR FREE	1139								Negative		0	1139	0	1139	0	1139	0	1139
TCGA-A7-A0D9-11	TCGA-A7-A0D9	BRCA	37	FEMALE	WHITE	Stage IIA		Infiltrating Ductal Carcinoma		2009	Pre (<6 months since LMP AND no prior bilateral ovariectomy AND not on estrogen replacement)	-13836	Alive	TUMOR FREE	1139								Negative		0	1139	0	1139	0	1139	0	1139
TCGA-A7-A0DA-01	TCGA-A7-A0DA	BRCA	62	FEMALE	WHITE	Stage IIA		Infiltrating Ductal Carcinoma		2009	Post (prior bilateral ovariectomy OR >12 mo since LMP with no prior hysterectomy)	-22708	Alive	TUMOR FREE	1085								Negative		0	1085	0	1085	0	1085	0	1085
TCGA-A7-A0DB-11	TCGA-A7-A0DB	BRCA	56	FEMALE	WHITE	Stage IIA		Infiltrating Ductal Carcinoma		2009	Post (prior bilateral ovariectomy OR >12 mo since LMP with no prior hysterectomy)	-20570	Alive	TUMOR FREE	1007								Close		0	1007	0	1007			0	1007
TCGA-A7-A0DB-01	TCGA-A7-A0DB	BRCA	56	FEMALE	WHITE	Stage IIA		Infiltrating Ductal Carcinoma		2009	Post (prior bilateral ovariectomy OR >12 mo since LMP with no prior hysterectomy)	-20570	Alive	TUMOR FREE	1007								Close		0	1007	0	1007			0	1007
TCGA-A7-A0DC-01	TCGA-A7-A0DC	BRCA	63	FEMALE	WHITE	Stage IA		Infiltrating Ductal Carcinoma		2009	Post (prior bilateral ovariectomy OR >12 mo since LMP with no prior hysterectomy)	-23294	Alive	TUMOR FREE	906								Negative		0	906	0	906	0	906	0	906	Redacted
TCGA-A7-A0DC-11	TCGA-A7-A0DC	BRCA	63	FEMALE	WHITE	Stage IA		Infiltrating Ductal Carcinoma		2009	Post (prior bilateral ovariectomy OR >12 mo since LMP with no prior hysterectomy)	-23294	Alive	TUMOR FREE	906								Negative		0	906	0	906	0	906	0	906	Redacted
TCGA-A7-A13D-01	TCGA-A7-A13D	BRCA	46	FEMALE	BLACK OR AFRICAN AMERICAN	Stage IIA		Infiltrating Ductal Carcinoma		2010	Post (prior bilateral ovariectomy OR >12 mo since LMP with no prior hysterectomy)	-17070	Alive	TUMOR FREE	965								Negative		0	965	0	965	0	965	0	965
TCGA-A7-A13E-11	TCGA-A7-A13E	BRCA	62	FEMALE	WHITE	Stage IIB		Infiltrating Ductal Carcinoma		2010	Post (prior bilateral ovariectomy OR >12 mo since LMP with no prior hysterectomy)	-22690	Dead	WITH TUMOR		614		Distant Metastasis	Other, specify	Lung, Bone, Liver, Brain and Skin Nodules	556		Negative		1	614	1	614	1	556	1	556
TCGA-A7-A13E-01	TCGA-A7-A13E	BRCA	62	FEMALE	WHITE	Stage IIB		Infiltrating Ductal Carcinoma		2010	Post (prior bilateral ovariectomy OR >12 mo since LMP with no prior hysterectomy)	-22690	Dead	WITH TUMOR		614		Distant Metastasis	Other, specify	Lung, Bone, Liver, Brain and Skin Nodules	556		Negative		1	614	1	614	1	556	1	556
TCGA-A7-A13F-01	TCGA-A7-A13F	BRCA	44	FEMALE	WHITE	Stage IIIA		Infiltrating Ductal Carcinoma		2010	Pre (<6 months since LMP AND no prior bilateral ovariectomy AND not on estrogen replacement)	-16363	Alive	TUMOR FREE	765								Negative		0	765	0	765	0	765	0	765
TCGA-A7-A13F-11	TCGA-A7-A13F	BRCA	44	FEMALE	WHITE	Stage IIIA		Infiltrating Ductal Carcinoma		2010	Pre (<6 months since LMP AND no prior bilateral ovariectomy AND not on estrogen replacement)	-16363	Alive	TUMOR FREE	765								Negative		0	765	0	765	0	765	0	765
TCGA-A7-A13G-01	TCGA-A7-A13G	BRCA	79	FEMALE	WHITE	Stage IIA		Infiltrating Ductal Carcinoma		2010	Post (prior bilateral ovariectomy OR >12 mo since LMP with no prior hysterectomy)	-28969	Alive	TUMOR FREE	718			New Primary Tumor	Other, specify	Skin, right leg	586		Negative		0	718	0	718	0	718	1	586
TCGA-A7-A13G-11	TCGA-A7-A13G	BRCA	79	FEMALE	WHITE	Stage IIA		Infiltrating Ductal Carcinoma		2010	Post (prior bilateral ovariectomy OR >12 mo since LMP with no prior hysterectomy)	-28969	Alive	TUMOR FREE	718			New Primary Tumor	Other, specify	Skin, right leg	586		Negative		0	718	0	718	0	718	1	586
TCGA-A7-A13H-01	TCGA-A7-A13H	BRCA	61	FEMALE	WHITE	Stage IIB		Infiltrating Lobular Carcinoma		2010	Post (prior bilateral ovariectomy OR >12 mo since LMP with no prior hysterectomy)	-22643	Alive	TUMOR FREE	899			New Primary Tumor	Other, specify	Skin lesion-Basal Cell Left Lower Lateral Back	795		Negative		0	899	0	899	0	899	1	795
TCGA-A7-A26E-01	TCGA-A7-A26E	BRCA	71	FEMALE	WHITE	Stage IIIA		Infiltrating Lobular Carcinoma		2010	Post (prior bilateral ovariectomy OR >12 mo since LMP with no prior hysterectomy)	-26274	Alive	TUMOR FREE	954								Negative		0	954	0	954	0	954	0	954
TCGA-A7-A26F-01	TCGA-A7-A26F	BRCA	55	FEMALE	WHITE	Stage IA		Other, specify		2010	Post (prior bilateral ovariectomy OR >12 mo since LMP with no prior hysterectomy)	-20210	Alive	TUMOR FREE	738								Negative		0	738	0	738	0	738	0	738
TCGA-A7-A26G-01	TCGA-A7-A26G	BRCA	50	FEMALE	BLACK OR AFRICAN AMERICAN	Stage IIA		Other, specify		2010	Pre (<6 months since LMP AND no prior bilateral ovariectomy AND not on estrogen replacement)	-18362	Alive	TUMOR FREE	722								Negative		0	722	0	722	0	722	0	722
TCGA-A7-A26H-01	TCGA-A7-A26H	BRCA	72	FEMALE	WHITE	Stage IIA		Infiltrating Ductal Carcinoma		2011	Post (prior bilateral ovariectomy OR >12 mo since LMP with no prior hysterectomy)	-26423	Alive	WITH TUMOR	724			Distant Metastasis	Liver		291		Negative		0	724	0	724	1	291	1	291
TCGA-A7-A26I-01	TCGA-A7-A26I	BRCA	65	FEMALE	WHITE	Stage IIA		Infiltrating Ductal Carcinoma		2011	Post (prior bilateral ovariectomy OR >12 mo since LMP with no prior hysterectomy)	-23948	Alive	TUMOR FREE	661								Negative		0	661	0	661	0	661	0	661
TCGA-A7-A26J-01	TCGA-A7-A26J	BRCA	49	FEMALE	WHITE	Stage IIA		Infiltrating Ductal Carcinoma		2011	Pre (<6 months since LMP AND no prior bilateral ovariectomy AND not on estrogen replacement)	-17930	Alive	TUMOR FREE	627								Negative		0	627	0	627	0	627	0	627
TCGA-A7-A2KD-01	TCGA-A7-A2KD	BRCA	53	FEMALE	BLACK OR AFRICAN AMERICAN	Stage IIIA		Infiltrating Ductal Carcinoma		2011	Post (prior bilateral ovariectomy OR >12 mo since LMP with no prior hysterectomy)	-19563	Alive	TUMOR FREE	679								Negative		0	679	0	679	0	679	0	679
TCGA-A7-A3IY-01	TCGA-A7-A3IY	BRCA	71	FEMALE	WHITE	Stage I		Mucinous Carcinoma		2011	Post (prior bilateral ovariectomy OR >12 mo since LMP with no prior hysterectomy)	-26042	Alive	TUMOR FREE	345								Negative		0	345	0	345	0	345	0	345
TCGA-A7-A3IZ-01	TCGA-A7-A3IZ	BRCA	62	FEMALE	WHITE	Stage IIA		Infiltrating Lobular Carcinoma		2011	Post (prior bilateral ovariectomy OR >12 mo since LMP with no prior hysterectomy)	-22997	Alive	TUMOR FREE	322								Negative		0	322	0	322	0	322	0	322
TCGA-A7-A3J0-01	TCGA-A7-A3J0	BRCA	62	FEMALE	WHITE	Stage IIA		Mucinous Carcinoma		2011	Post (prior bilateral ovariectomy OR >12 mo since LMP with no prior hysterectomy)	-22672	Alive	TUMOR FREE	313								Negative		0	313	0	313	0	313	0	313
TCGA-A7-A3J1-01	TCGA-A7-A3J1	BRCA	63	FEMALE	WHITE	Stage IA		Infiltrating Lobular Carcinoma		2011	Post (prior bilateral ovariectomy OR >12 mo since LMP with no prior hysterectomy)	-23209	Alive	TUMOR FREE	343								Negative		0	343	0	343	0	343	0	343
TCGA-A7-A3RF-01	TCGA-A7-A3RF	BRCA	79	FEMALE	WHITE	Stage IIA		Mucinous Carcinoma		2012	Post (prior bilateral ovariectomy OR >12 mo since LMP with no prior hysterectomy)	-29184	Alive	WITH TUMOR	408			Distant Metastasis	Bone		174		Negative		0	408	0	408	1	174	1	174
TCGA-A7-A425-01	TCGA-A7-A425	BRCA	70	FEMALE	WHITE	Stage IIIC		Infiltrating Lobular Carcinoma		2012	Post (prior bilateral ovariectomy OR >12 mo since LMP with no prior hysterectomy)	-25678	Alive	WITH TUMOR	447			Locoregional Recurrence	Other, specify	Left Breast	419		Negative		0	447	0	447	1	419	1	419
TCGA-A7-A426-01	TCGA-A7-A426	BRCA	50	FEMALE	WHITE	Stage IIIC		Infiltrating Lobular Carcinoma		2012	Pre (<6 months since LMP AND no prior bilateral ovariectomy AND not on estrogen replacement)	-18296	Alive	TUMOR FREE	364								Negative		0	364	0	364	0	364	0	364
TCGA-A7-A4SA-01	TCGA-A7-A4SA	BRCA	40	FEMALE	WHITE	Stage IIB		Infiltrating Lobular Carcinoma		2012	Pre (<6 months since LMP AND no prior bilateral ovariectomy AND not on estrogen replacement)	-14906	Alive	TUMOR FREE	454								Negative		0	454	0	454	0	454	0	454
TCGA-A7-A4SB-01	TCGA-A7-A4SB	BRCA	56	FEMALE	WHITE	Stage IIIA		Infiltrating Lobular Carcinoma		2012	Post (prior bilateral ovariectomy OR >12 mo since LMP with no prior hysterectomy)	-20539	Alive	TUMOR FREE	418								Negative		0	418	0	418	0	418	0	418
TCGA-A7-A4SC-01	TCGA-A7-A4SC	BRCA	62	FEMALE	WHITE	Stage IIB		Infiltrating Lobular Carcinoma		2012	Post (prior bilateral ovariectomy OR >12 mo since LMP with no prior hysterectomy)	-23008	Alive	TUMOR FREE	446								Negative		0	446	0	446	0	446	0	446
TCGA-A7-A4SD-01	TCGA-A7-A4SD	BRCA	52	FEMALE	BLACK OR AFRICAN AMERICAN	Stage IIA		Infiltrating Ductal Carcinoma		2012	Post (prior bilateral ovariectomy OR >12 mo since LMP with no prior hysterectomy)	-19131	Alive	TUMOR FREE	441								Negative		0	441	0	441	0	441	0	441
TCGA-A7-A4SE-01	TCGA-A7-A4SE	BRCA	54	FEMALE	BLACK OR AFRICAN AMERICAN	Stage IIA		Infiltrating Ductal Carcinoma		2011	Post (prior bilateral ovariectomy OR >12 mo since LMP with no prior hysterectomy)	-20080	Alive	TUMOR FREE	644								Negative		0	644	0	644	0	644	0	644
TCGA-A7-A4SF-01	TCGA-A7-A4SF	BRCA	54	FEMALE	BLACK OR AFRICAN AMERICAN	Stage IIA		Infiltrating Ductal Carcinoma		2012	Post (prior bilateral ovariectomy OR >12 mo since LMP with no prior hysterectomy)	-19985	Alive	TUMOR FREE	545								Positive		0	545	0	545			0	545
TCGA-A7-A56D-01	TCGA-A7-A56D	BRCA	84	FEMALE	BLACK OR AFRICAN AMERICAN	Stage IIA		Infiltrating Ductal Carcinoma		2012	Post (prior bilateral ovariectomy OR >12 mo since LMP with no prior hysterectomy)	-30783	Alive	TUMOR FREE	448								Negative		0	448	0	448	0	448	0	448
TCGA-A7-A5ZV-01	TCGA-A7-A5ZV	BRCA	62	FEMALE	BLACK OR AFRICAN AMERICAN	Stage IIA		Infiltrating Carcinoma NOS		2012	Post (prior bilateral ovariectomy OR >12 mo since LMP with no prior hysterectomy)	-22966	Alive	TUMOR FREE	368								Negative		0	368	0	368	0	368	0	368
TCGA-A7-A5ZW-01	TCGA-A7-A5ZW	BRCA	47	FEMALE	BLACK OR AFRICAN AMERICAN	Stage IIA		Infiltrating Ductal Carcinoma		2012	Peri (6-12 months since last menstrual period)	-17529	Alive	TUMOR FREE	326								Negative		0	326	0	326	0	326	0	326
TCGA-A7-A5ZX-01	TCGA-A7-A5ZX	BRCA	48	FEMALE	WHITE	Stage IIIC		Infiltrating Lobular Carcinoma		2012	Pre (<6 months since LMP AND no prior bilateral ovariectomy AND not on estrogen replacement)	-17683	Alive	TUMOR FREE	336								[Unknown]		0	336	0	336			0	336
TCGA-A7-A6VV-01	TCGA-A7-A6VV	BRCA	51	FEMALE	BLACK OR AFRICAN AMERICAN	Stage IIA		Infiltrating Ductal Carcinoma		2013	Peri (6-12 months since last menstrual period)	-18695	Alive	TUMOR FREE	313								Negative		0	313	0	313	0	313	0	313
TCGA-A7-A6VW-01	TCGA-A7-A6VW	BRCA	48	FEMALE	BLACK OR AFRICAN AMERICAN	Stage IIA		Infiltrating Ductal Carcinoma		2013	Post (prior bilateral ovariectomy OR >12 mo since LMP with no prior hysterectomy)	-17539	Alive	TUMOR FREE	285								Close		0	285	0	285			0	285
TCGA-A7-A6VX-01	TCGA-A7-A6VX	BRCA	68	FEMALE	BLACK OR AFRICAN AMERICAN	Stage IIA		Infiltrating Ductal Carcinoma		2013	Post (prior bilateral ovariectomy OR >12 mo since LMP with no prior hysterectomy)	-25066	Alive	TUMOR FREE	317								Negative		0	317	0	317	0	317	0	317
TCGA-A7-A6VY-01	TCGA-A7-A6VY	BRCA	48	FEMALE	BLACK OR AFRICAN AMERICAN	Stage IIB		Infiltrating Ductal Carcinoma		2013	Post (prior bilateral ovariectomy OR >12 mo since LMP with no prior hysterectomy)	-17640	Alive	TUMOR FREE	266								Negative		0	266	0	266	0	266	0	266
TCGA-A8-A06N-01	TCGA-A8-A06N	BRCA	66	FEMALE		Stage IIIB		Infiltrating Ductal Carcinoma		2009	Post (prior bilateral ovariectomy OR >12 mo since LMP with no prior hysterectomy)	-24288	Alive	TUMOR FREE	0								Negative		0	0	0	0	0	0	0	0
TCGA-A8-A06O-01	TCGA-A8-A06O	BRCA	60	FEMALE		Stage I		Infiltrating Ductal Carcinoma		2009	Post (prior bilateral ovariectomy OR >12 mo since LMP with no prior hysterectomy)	-22157	Alive	TUMOR FREE	396								Negative		0	396	0	396	0	396	0	396
TCGA-A8-A06P-01	TCGA-A8-A06P	BRCA	63	FEMALE		Stage IIIA		Infiltrating Ductal Carcinoma		2009	Post (prior bilateral ovariectomy OR >12 mo since LMP with no prior hysterectomy)	-23011	Alive	TUMOR FREE	396								Negative		0	396	0	396	0	396	0	396
TCGA-A8-A06Q-01	TCGA-A8-A06Q	BRCA	63	FEMALE		Stage IIIA		Infiltrating Ductal Carcinoma		2007	Post (prior bilateral ovariectomy OR >12 mo since LMP with no prior hysterectomy)	-23164	Alive	TUMOR FREE	31								Negative		0	31	0	31	0	31	0	31
TCGA-A8-A06R-01	TCGA-A8-A06R	BRCA	69	FEMALE		Stage IIB		Infiltrating Ductal Carcinoma		2007	Post (prior bilateral ovariectomy OR >12 mo since LMP with no prior hysterectomy)	-25477	Alive	TUMOR FREE	547								Negative		0	547	0	547	0	547	0	547
TCGA-A8-A06T-01	TCGA-A8-A06T	BRCA	75	FEMALE		Stage IIIA		Infiltrating Ductal Carcinoma		2007	Post (prior bilateral ovariectomy OR >12 mo since LMP with no prior hysterectomy)	-27393	Alive	TUMOR FREE	1614								Negative		0	1614	0	1614	0	1614	0	1614
TCGA-A8-A06U-01	TCGA-A8-A06U	BRCA	80	FEMALE		Stage IIB		Infiltrating Ductal Carcinoma		2008	Post (prior bilateral ovariectomy OR >12 mo since LMP with no prior hysterectomy)	-29525	Dead	TUMOR FREE		883							Negative		1	883	0	883	0	883	0	883
TCGA-A8-A06X-01	TCGA-A8-A06X	BRCA	77	FEMALE		Stage IIB		Infiltrating Ductal Carcinoma		2006	Post (prior bilateral ovariectomy OR >12 mo since LMP with no prior hysterectomy)	-28338	Dead	TUMOR FREE		943							Negative		1	943	0	943	0	943	0	943
TCGA-A8-A06Y-01	TCGA-A8-A06Y	BRCA	66	FEMALE		Stage IIA		Infiltrating Ductal Carcinoma		2008	Post (prior bilateral ovariectomy OR >12 mo since LMP with no prior hysterectomy)	-24442	Alive	TUMOR FREE	791						791		Negative		0	791	0	791	1	791	1	791
TCGA-A8-A06Z-01	TCGA-A8-A06Z	BRCA	84	FEMALE		Stage IIB		Infiltrating Ductal Carcinoma		2007	Post (prior bilateral ovariectomy OR >12 mo since LMP with no prior hysterectomy)	-30984	Alive		31										0	31	0	31			0	31
TCGA-A8-A075-01	TCGA-A8-A075	BRCA	42	FEMALE		Stage IIB		Infiltrating Ductal Carcinoma		2009	Pre (<6 months since LMP AND no prior bilateral ovariectomy AND not on estrogen replacement)	-15369	Alive	TUMOR FREE	518								Negative		0	518	0	518	0	518	0	518
TCGA-A8-A076-01	TCGA-A8-A076	BRCA	66	FEMALE		Stage IIA		Infiltrating Ductal Carcinoma		2006	Post (prior bilateral ovariectomy OR >12 mo since LMP with no prior hysterectomy)	-24230	Alive	TUMOR FREE	1642								Negative		0	1642	0	1642	0	1642	0	1642
TCGA-A8-A079-01	TCGA-A8-A079	BRCA	69	FEMALE		Stage IIIB		Infiltrating Ductal Carcinoma		2007	Post (prior bilateral ovariectomy OR >12 mo since LMP with no prior hysterectomy)	-25294	Alive	TUMOR FREE	274								Negative		0	274	0	274	0	274	0	274
TCGA-A8-A07B-01	TCGA-A8-A07B	BRCA	69	FEMALE		Stage IIA		Infiltrating Ductal Carcinoma		2007	Post (prior bilateral ovariectomy OR >12 mo since LMP with no prior hysterectomy)	-25475	Alive	TUMOR FREE	1308								Negative		0	1308	0	1308	0	1308	0	1308
TCGA-A8-A07C-01	TCGA-A8-A07C	BRCA	57	FEMALE		Stage IIA		Infiltrating Ductal Carcinoma		2008	Post (prior bilateral ovariectomy OR >12 mo since LMP with no prior hysterectomy)	-20820	Alive	TUMOR FREE	1034								Negative		0	1034	0	1034	0	1034	0	1034
TCGA-A8-A07E-01	TCGA-A8-A07E	BRCA	81	FEMALE		Stage X		Infiltrating Ductal Carcinoma		2008	Post (prior bilateral ovariectomy OR >12 mo since LMP with no prior hysterectomy)	-29800	Alive	TUMOR FREE	608								Negative		0	608	0	608	0	608	0	608
TCGA-A8-A07F-01	TCGA-A8-A07F	BRCA	65	FEMALE		Stage IIB		Infiltrating Ductal Carcinoma		2009	Post (prior bilateral ovariectomy OR >12 mo since LMP with no prior hysterectomy)	-23742	Alive	TUMOR FREE	577								Negative		0	577	0	577	0	577	0	577
TCGA-A8-A07G-01	TCGA-A8-A07G	BRCA	65	FEMALE		Stage IIA		Infiltrating Ductal Carcinoma		2009	Post (prior bilateral ovariectomy OR >12 mo since LMP with no prior hysterectomy)	-23926	Alive	TUMOR FREE	577								Negative		0	577	0	577	0	577	0	577
TCGA-A8-A07I-01	TCGA-A8-A07I	BRCA	69	FEMALE		Stage IIIA		Infiltrating Ductal Carcinoma		2009	Post (prior bilateral ovariectomy OR >12 mo since LMP with no prior hysterectomy)	-25263	Alive	TUMOR FREE	426								Negative		0	426	0	426	0	426	0	426
TCGA-A8-A07J-01	TCGA-A8-A07J	BRCA	35	FEMALE		Stage IIB		Infiltrating Ductal Carcinoma		2009	Pre (<6 months since LMP AND no prior bilateral ovariectomy AND not on estrogen replacement)	-12965	Alive	TUMOR FREE	365								Negative		0	365	0	365	0	365	0	365
TCGA-A8-A07L-01	TCGA-A8-A07L	BRCA	58	FEMALE		Stage IIIA		Infiltrating Ductal Carcinoma		2009	Post (prior bilateral ovariectomy OR >12 mo since LMP with no prior hysterectomy)	-21428	Alive	TUMOR FREE	975								Negative		0	975	0	975	0	975	0	975
TCGA-A8-A07O-01	TCGA-A8-A07O	BRCA	51	FEMALE		Stage IIA		Infiltrating Ductal Carcinoma		2009	Post (prior bilateral ovariectomy OR >12 mo since LMP with no prior hysterectomy)	-18870	Alive	TUMOR FREE	304								Negative		0	304	0	304	0	304	0	304
TCGA-A8-A07P-01	TCGA-A8-A07P	BRCA	68	FEMALE		Stage IIB		Infiltrating Ductal Carcinoma		2009	Post (prior bilateral ovariectomy OR >12 mo since LMP with no prior hysterectomy)	-24929	Alive	TUMOR FREE	334								Negative		0	334	0	334	0	334	0	334
TCGA-A8-A07R-01	TCGA-A8-A07R	BRCA	80	FEMALE		Stage IIIC		Infiltrating Ductal Carcinoma		2009		-29251	Alive		273								Positive		0	273	0	273			0	273
TCGA-A8-A07S-01	TCGA-A8-A07S	BRCA	73	FEMALE		Stage IIA		Mixed Histology (please specify)		2009	Post (prior bilateral ovariectomy OR >12 mo since LMP with no prior hysterectomy)	-26998	Alive	WITH TUMOR	243								Positive		0	243	0	243			0	243
TCGA-A8-A07U-01	TCGA-A8-A07U	BRCA	66	FEMALE		Stage IIIA		Infiltrating Ductal Carcinoma		2009	Post (prior bilateral ovariectomy OR >12 mo since LMP with no prior hysterectomy)	-24411	Alive	TUMOR FREE	760								Negative		0	760	0	760	0	760	0	760
TCGA-A8-A07W-01	TCGA-A8-A07W	BRCA	76	FEMALE		Stage IV		Infiltrating Ductal Carcinoma		2009	Post (prior bilateral ovariectomy OR >12 mo since LMP with no prior hysterectomy)	-27942	Alive	WITH TUMOR	304								Positive		0	304	0	304			0	304
TCGA-A8-A07Z-01	TCGA-A8-A07Z	BRCA	85	FEMALE		Stage IIA		Infiltrating Ductal Carcinoma		2008	Post (prior bilateral ovariectomy OR >12 mo since LMP with no prior hysterectomy)	-31351	Alive	TUMOR FREE	1371								Negative		0	1371	0	1371	0	1371	0	1371
TCGA-A8-A081-01	TCGA-A8-A081	BRCA	80	FEMALE		Stage IIA		Infiltrating Ductal Carcinoma		2008	Post (prior bilateral ovariectomy OR >12 mo since LMP with no prior hysterectomy)	-29555	Alive	TUMOR FREE	0								Negative		0	0	0	0	0	0	0	0
TCGA-A8-A082-01	TCGA-A8-A082	BRCA	58	FEMALE		Stage IIB		Infiltrating Ductal Carcinoma		2008	Post (prior bilateral ovariectomy OR >12 mo since LMP with no prior hysterectomy)	-21338	Alive	TUMOR FREE	549								Negative		0	549	0	549	0	549	0	549
TCGA-A8-A083-01	TCGA-A8-A083	BRCA	67	FEMALE		Stage IIB		Infiltrating Ductal Carcinoma		2008	Post (prior bilateral ovariectomy OR >12 mo since LMP with no prior hysterectomy)	-24746	Alive	TUMOR FREE	0								Negative		0	0	0	0	0	0	0	0
TCGA-A8-A084-01	TCGA-A8-A084	BRCA	81	FEMALE		Stage IIB		Infiltrating Ductal Carcinoma		2007	Post (prior bilateral ovariectomy OR >12 mo since LMP with no prior hysterectomy)	-29858	Alive	WITH TUMOR	458								Positive		0	458	0	458			0	458
TCGA-A8-A085-01	TCGA-A8-A085	BRCA	44	MALE		Stage IIB		Infiltrating Ductal Carcinoma		2008		-16377	Alive	TUMOR FREE	1124								Negative		0	1124	0	1124	0	1124	0	1124
TCGA-A8-A086-01	TCGA-A8-A086	BRCA	59	FEMALE		Stage IIA		Infiltrating Ductal Carcinoma		2009	Post (prior bilateral ovariectomy OR >12 mo since LMP with no prior hysterectomy)	-21731	Alive	TUMOR FREE	396								Negative		0	396	0	396	0	396	0	396
TCGA-A8-A08A-01	TCGA-A8-A08A	BRCA	89	FEMALE		Stage I		Infiltrating Ductal Carcinoma		2007	Post (prior bilateral ovariectomy OR >12 mo since LMP with no prior hysterectomy)	-32750	Alive	TUMOR FREE	30								Negative		0	30	0	30	0	30	0	30
TCGA-A8-A08B-01	TCGA-A8-A08B	BRCA	52	FEMALE		Stage IIA		Infiltrating Ductal Carcinoma		2008	Pre (<6 months since LMP AND no prior bilateral ovariectomy AND not on estrogen replacement)	-19114	Alive	TUMOR FREE	1156								Negative		0	1156	0	1156	0	1156	0	1156
TCGA-A8-A08C-01	TCGA-A8-A08C	BRCA	65	FEMALE		Stage IIA		Infiltrating Ductal Carcinoma		2008	Post (prior bilateral ovariectomy OR >12 mo since LMP with no prior hysterectomy)	-24017	Alive	TUMOR FREE	881								Negative		0	881	0	881	0	881	0	881
TCGA-A8-A08F-01	TCGA-A8-A08F	BRCA	59	FEMALE		Stage IIIC		Infiltrating Ductal Carcinoma		2008	Post (prior bilateral ovariectomy OR >12 mo since LMP with no prior hysterectomy)	-21641	Alive	TUMOR FREE	1004								Negative		0	1004	0	1004	0	1004	0	1004
TCGA-A8-A08G-01	TCGA-A8-A08G	BRCA	41	FEMALE		Stage IIA		Infiltrating Ductal Carcinoma		2009	Pre (<6 months since LMP AND no prior bilateral ovariectomy AND not on estrogen replacement)	-14976	Alive	TUMOR FREE	607								Negative		0	607	0	607	0	607	0	607
TCGA-A8-A08H-01	TCGA-A8-A08H	BRCA	66	FEMALE		Stage IIA		Infiltrating Ductal Carcinoma		2007	Post (prior bilateral ovariectomy OR >12 mo since LMP with no prior hysterectomy)	-24137	Alive	TUMOR FREE	0								Negative		0	0	0	0	0	0	0	0
TCGA-A8-A08I-01	TCGA-A8-A08I	BRCA	53	FEMALE		Stage IIA		Infiltrating Ductal Carcinoma		2009	Post (prior bilateral ovariectomy OR >12 mo since LMP with no prior hysterectomy)	-19389	Alive	TUMOR FREE	365								Negative		0	365	0	365	0	365	0	365
TCGA-A8-A08J-01	TCGA-A8-A08J	BRCA	52	FEMALE		Stage IV		Infiltrating Ductal Carcinoma		2005	Post (prior bilateral ovariectomy OR >12 mo since LMP with no prior hysterectomy)	-19266	Dead	WITH TUMOR		1127							Positive		1	1127	1	1127			1	1127
TCGA-A8-A08L-01	TCGA-A8-A08L	BRCA	89	FEMALE		Stage IIIA		Infiltrating Ductal Carcinoma		2008	Post (prior bilateral ovariectomy OR >12 mo since LMP with no prior hysterectomy)	-32842	Dead	TUMOR FREE		304							Negative		1	304	0	304	0	304	0	304
TCGA-A8-A08O-01	TCGA-A8-A08O	BRCA	45	FEMALE		Stage IV		Infiltrating Ductal Carcinoma		2008	Pre (<6 months since LMP AND no prior bilateral ovariectomy AND not on estrogen replacement)	-16681	Alive	WITH TUMOR	943						762		Positive		0	943	0	943			1	762
TCGA-A8-A08P-01	TCGA-A8-A08P	BRCA	70	FEMALE		Stage IIIA		Infiltrating Ductal Carcinoma		2008	Post (prior bilateral ovariectomy OR >12 mo since LMP with no prior hysterectomy)	-25598	Alive	TUMOR FREE	943								Negative		0	943	0	943	0	943	0	943
TCGA-A8-A08R-01	TCGA-A8-A08R	BRCA	52	FEMALE		Stage IIB		Infiltrating Ductal Carcinoma		2008	Post (prior bilateral ovariectomy OR >12 mo since LMP with no prior hysterectomy)	-19298	Alive	TUMOR FREE	30								Negative		0	30	0	30	0	30	0	30
TCGA-A8-A08S-01	TCGA-A8-A08S	BRCA	71	FEMALE		Stage IIA		Infiltrating Ductal Carcinoma		2008	Post (prior bilateral ovariectomy OR >12 mo since LMP with no prior hysterectomy)	-25994	Alive	TUMOR FREE	1004								Negative		0	1004	0	1004	0	1004	0	1004
TCGA-A8-A08T-01	TCGA-A8-A08T	BRCA	64	FEMALE		Stage IV		Infiltrating Ductal Carcinoma		2002	Post (prior bilateral ovariectomy OR >12 mo since LMP with no prior hysterectomy)	-23560	Dead	WITH TUMOR		3409					2557		Positive		1	3409	1	3409			1	2557
TCGA-A8-A08X-01	TCGA-A8-A08X	BRCA	43	FEMALE		Stage IIIC		Infiltrating Ductal Carcinoma		2007	Pre (<6 months since LMP AND no prior bilateral ovariectomy AND not on estrogen replacement)	-15705	Alive	TUMOR FREE	1308						366		Negative		0	1308	0	1308	1	366	1	366
TCGA-A8-A08Z-01	TCGA-A8-A08Z	BRCA	76	FEMALE		[Discrepancy]		Infiltrating Ductal Carcinoma		2004	Post (prior bilateral ovariectomy OR >12 mo since LMP with no prior hysterectomy)	-28003	Alive	TUMOR FREE	1217								Negative		0	1217	0	1217	0	1217	0	1217
TCGA-A8-A090-01	TCGA-A8-A090	BRCA	74	FEMALE		Stage IIA		Infiltrating Ductal Carcinoma		2008	Post (prior bilateral ovariectomy OR >12 mo since LMP with no prior hysterectomy)	-27121	Alive	TUMOR FREE	0								Negative		0	0	0	0	0	0	0	0
TCGA-A8-A091-01	TCGA-A8-A091	BRCA	61	FEMALE		Stage IIA		Infiltrating Ductal Carcinoma		2008	Post (prior bilateral ovariectomy OR >12 mo since LMP with no prior hysterectomy)	-22554	Alive	TUMOR FREE	1004						243		Negative		0	1004	0	1004	1	243	1	243
TCGA-A8-A092-01	TCGA-A8-A092	BRCA	48	FEMALE		Stage IIIA		Infiltrating Ductal Carcinoma		2008	Pre (<6 months since LMP AND no prior bilateral ovariectomy AND not on estrogen replacement)	-17807	Alive	TUMOR FREE	942								Negative		0	942	0	942	0	942	0	942
TCGA-A8-A093-01	TCGA-A8-A093	BRCA	61	FEMALE		Stage IIA		Infiltrating Ductal Carcinoma		2009	Post (prior bilateral ovariectomy OR >12 mo since LMP with no prior hysterectomy)	-22373	Alive	TUMOR FREE	546								Negative		0	546	0	546	0	546	0	546
TCGA-A8-A094-01	TCGA-A8-A094	BRCA	75	FEMALE		Stage IIA		Infiltrating Ductal Carcinoma		2009	Post (prior bilateral ovariectomy OR >12 mo since LMP with no prior hysterectomy)	-27729	Alive	TUMOR FREE	0								Negative		0	0	0	0	0	0	0	0
TCGA-A8-A095-01	TCGA-A8-A095	BRCA	45	FEMALE		Stage I		Infiltrating Ductal Carcinoma		2007	Pre (<6 months since LMP AND no prior bilateral ovariectomy AND not on estrogen replacement)	-16742	Alive	TUMOR FREE	1277								Negative		0	1277	0	1277	0	1277	0	1277
TCGA-A8-A096-01	TCGA-A8-A096	BRCA	73	FEMALE		Stage IIA		Infiltrating Ductal Carcinoma		2009	Post (prior bilateral ovariectomy OR >12 mo since LMP with no prior hysterectomy)	-26723	Alive	TUMOR FREE	0								Negative		0	0	0	0	0	0	0	0
TCGA-A8-A097-01	TCGA-A8-A097	BRCA	65	FEMALE		Stage IIB		Infiltrating Ductal Carcinoma		2009	Post (prior bilateral ovariectomy OR >12 mo since LMP with no prior hysterectomy)	-23741	Alive	TUMOR FREE	365								Negative		0	365	0	365	0	365	0	365
TCGA-A8-A099-01	TCGA-A8-A099	BRCA	76	FEMALE		Stage X		Infiltrating Ductal Carcinoma		2009	Post (prior bilateral ovariectomy OR >12 mo since LMP with no prior hysterectomy)	-28063	Alive		304										0	304	0	304			0	304
TCGA-A8-A09A-01	TCGA-A8-A09A	BRCA	40	FEMALE		Stage X		Infiltrating Ductal Carcinoma		2009	Pre (<6 months since LMP AND no prior bilateral ovariectomy AND not on estrogen replacement)	-14883	Alive	WITH TUMOR	304								Positive		0	304	0	304			0	304
TCGA-A8-A09B-01	TCGA-A8-A09B	BRCA	58	FEMALE		Stage IIIB		Infiltrating Ductal Carcinoma		2009	Post (prior bilateral ovariectomy OR >12 mo since LMP with no prior hysterectomy)	-21520	Alive	TUMOR FREE	365								Negative		0	365	0	365	0	365	0	365
TCGA-A8-A09C-01	TCGA-A8-A09C	BRCA	69	FEMALE		Stage X		Infiltrating Ductal Carcinoma		2009	Post (prior bilateral ovariectomy OR >12 mo since LMP with no prior hysterectomy)	-25355	Alive		31										0	31	0	31			0	31
TCGA-A8-A09D-01	TCGA-A8-A09D	BRCA	47	FEMALE		Stage IIB		Infiltrating Ductal Carcinoma		2007	Post (prior bilateral ovariectomy OR >12 mo since LMP with no prior hysterectomy)	-17440	Alive	TUMOR FREE	1522								Negative		0	1522	0	1522	0	1522	0	1522
TCGA-A8-A09E-01	TCGA-A8-A09E	BRCA	73	FEMALE		Stage IIIB		Infiltrating Ductal Carcinoma		2008	Post (prior bilateral ovariectomy OR >12 mo since LMP with no prior hysterectomy)	-26724	Alive	WITH TUMOR	1492								Positive		0	1492	0	1492			0	1492
TCGA-A8-A09G-01	TCGA-A8-A09G	BRCA	79	FEMALE		Stage IIIC		Infiltrating Ductal Carcinoma		2008	Post (prior bilateral ovariectomy OR >12 mo since LMP with no prior hysterectomy)	-29006	Alive	TUMOR FREE	0								Negative		0	0	0	0	0	0	0	0
TCGA-A8-A09I-01	TCGA-A8-A09I	BRCA	84	FEMALE		Stage IIA		Infiltrating Ductal Carcinoma		2008	Post (prior bilateral ovariectomy OR >12 mo since LMP with no prior hysterectomy)	-30711	Alive	TUMOR FREE	1371								Negative		0	1371	0	1371	0	1371	0	1371
TCGA-A8-A09K-01	TCGA-A8-A09K	BRCA	68	FEMALE		Stage IIA		Infiltrating Ductal Carcinoma		2008	Post (prior bilateral ovariectomy OR >12 mo since LMP with no prior hysterectomy)	-24960	Alive	TUMOR FREE	912								Negative		0	912	0	912	0	912	0	912
TCGA-A8-A09M-01	TCGA-A8-A09M	BRCA	75	FEMALE		Stage IIIC		Infiltrating Ductal Carcinoma		2009	Post (prior bilateral ovariectomy OR >12 mo since LMP with no prior hysterectomy)	-27455	Alive	TUMOR FREE	1006								Negative		0	1006	0	1006	0	1006	0	1006
TCGA-A8-A09N-01	TCGA-A8-A09N	BRCA	57	FEMALE		Stage IIIC		Infiltrating Ductal Carcinoma		2006	Post (prior bilateral ovariectomy OR >12 mo since LMP with no prior hysterectomy)	-21002	Alive	TUMOR FREE	31								Negative		0	31	0	31	0	31	0	31
TCGA-A8-A09Q-01	TCGA-A8-A09Q	BRCA	83	FEMALE		Stage IIIB		Infiltrating Ductal Carcinoma		2008	Post (prior bilateral ovariectomy OR >12 mo since LMP with no prior hysterectomy)	-30528	Alive	WITH TUMOR	761								Positive		0	761	0	761			0	761
TCGA-A8-A09R-01	TCGA-A8-A09R	BRCA	82	FEMALE		Stage IIB		Infiltrating Ductal Carcinoma		2009	Post (prior bilateral ovariectomy OR >12 mo since LMP with no prior hysterectomy)	-30196	Alive	TUMOR FREE	273								Negative		0	273	0	273	0	273	0	273
TCGA-A8-A09T-01	TCGA-A8-A09T	BRCA	68	FEMALE		[Discrepancy]		Infiltrating Lobular Carcinoma		2009	Post (prior bilateral ovariectomy OR >12 mo since LMP with no prior hysterectomy)	-25110	Alive	TUMOR FREE	579								Negative		0	579	0	579	0	579	0	579
TCGA-A8-A09V-01	TCGA-A8-A09V	BRCA	51	FEMALE		Stage IIA		Infiltrating Lobular Carcinoma		2009	Pre (<6 months since LMP AND no prior bilateral ovariectomy AND not on estrogen replacement)	-18628	Alive	TUMOR FREE	457								Negative		0	457	0	457	0	457	0	457
TCGA-A8-A09W-01	TCGA-A8-A09W	BRCA	70	FEMALE		Stage IIIB		Infiltrating Lobular Carcinoma		2007	Post (prior bilateral ovariectomy OR >12 mo since LMP with no prior hysterectomy)	-25659	Alive		30										0	30	0	30			0	30
TCGA-A8-A09X-01	TCGA-A8-A09X	BRCA	62	FEMALE		Stage IIIC		Infiltrating Lobular Carcinoma		2009	Post (prior bilateral ovariectomy OR >12 mo since LMP with no prior hysterectomy)	-22858	Dead			426									1	426		426			0	426
TCGA-A8-A09Z-01	TCGA-A8-A09Z	BRCA	83	FEMALE		Stage IIB		Infiltrating Lobular Carcinoma		2008	Post (prior bilateral ovariectomy OR >12 mo since LMP with no prior hysterectomy)	-30590	Alive	WITH TUMOR	0								Positive		0	0	0	0			0	0
TCGA-A8-A0A1-01	TCGA-A8-A0A1	BRCA	84	FEMALE		Stage IIA		Infiltrating Lobular Carcinoma		2009	Post (prior bilateral ovariectomy OR >12 mo since LMP with no prior hysterectomy)	-30742	Alive	TUMOR FREE	365								Negative		0	365	0	365	0	365	0	365
TCGA-A8-A0A2-01	TCGA-A8-A0A2	BRCA	66	FEMALE		Stage IIA		Infiltrating Lobular Carcinoma		2009	Post (prior bilateral ovariectomy OR >12 mo since LMP with no prior hysterectomy)	-24380	Alive	TUMOR FREE	579								Negative		0	579	0	579	0	579	0	579
TCGA-A8-A0A4-01	TCGA-A8-A0A4	BRCA	73	FEMALE		Stage IIA		Infiltrating Lobular Carcinoma		2009	Post (prior bilateral ovariectomy OR >12 mo since LMP with no prior hysterectomy)	-26693	Alive	TUMOR FREE	396								Negative		0	396	0	396	0	396	0	396
TCGA-A8-A0A6-01	TCGA-A8-A0A6	BRCA	64	FEMALE		Stage IIIC		Infiltrating Lobular Carcinoma		2009	Post (prior bilateral ovariectomy OR >12 mo since LMP with no prior hysterectomy)	-23404	Alive	TUMOR FREE	640								Negative		0	640	0	640	0	640	0	640
TCGA-A8-A0A7-01	TCGA-A8-A0A7	BRCA	57	FEMALE		Stage IIB		Infiltrating Lobular Carcinoma		2009	Post (prior bilateral ovariectomy OR >12 mo since LMP with no prior hysterectomy)	-20940	Alive	TUMOR FREE	30								Negative		0	30	0	30	0	30	0	30
TCGA-A8-A0A9-01	TCGA-A8-A0A9	BRCA	80	FEMALE		Stage IIA		Infiltrating Ductal Carcinoma		2009	Post (prior bilateral ovariectomy OR >12 mo since LMP with no prior hysterectomy)	-29370	Alive	TUMOR FREE	822								Negative		0	822	0	822	0	822	0	822
TCGA-A8-A0AB-01	TCGA-A8-A0AB	BRCA	54	FEMALE		Stage IIA		Infiltrating Lobular Carcinoma		2009	Post (prior bilateral ovariectomy OR >12 mo since LMP with no prior hysterectomy)	-19814	Alive	TUMOR FREE	518								Negative		0	518	0	518	0	518	0	518
TCGA-A8-A0AD-01	TCGA-A8-A0AD	BRCA	83	FEMALE		Stage I		Mixed Histology (please specify)		2007	Post (prior bilateral ovariectomy OR >12 mo since LMP with no prior hysterectomy)	-30407	Alive	TUMOR FREE	1157								Negative		0	1157	0	1157	0	1157	0	1157
TCGA-AC-A23C-01	TCGA-AC-A23C	BRCA	62	FEMALE	WHITE	Stage IIB		Infiltrating Ductal Carcinoma		2010	Post (prior bilateral ovariectomy OR >12 mo since LMP with no prior hysterectomy)	-22751	Alive	TUMOR FREE	585								Negative		0	585	0	585	0	585	0	585
TCGA-AC-A23E-01	TCGA-AC-A23E	BRCA	50	FEMALE	WHITE	Stage IIB		Infiltrating Ductal Carcinoma		2010		-18500	Alive	TUMOR FREE	698								Negative		0	698	0	698	0	698	0	698
TCGA-AC-A23G-01	TCGA-AC-A23G	BRCA	76	FEMALE	WHITE	Stage IIA		Infiltrating Lobular Carcinoma		2006	Post (prior bilateral ovariectomy OR >12 mo since LMP with no prior hysterectomy)	-27934	Alive	TUMOR FREE	2248								Negative		0	2248	0	2248	0	2248	0	2248
TCGA-AC-A23H-01	TCGA-AC-A23H	BRCA	90	FEMALE	WHITE	Stage IIA		Infiltrating Ductal Carcinoma		2009	Post (prior bilateral ovariectomy OR >12 mo since LMP with no prior hysterectomy)	-32873	Dead	WITH TUMOR		174							Negative		1	174	1	174			1	174
TCGA-AC-A23H-11	TCGA-AC-A23H	BRCA	90	FEMALE	WHITE	Stage IIA		Infiltrating Ductal Carcinoma		2009	Post (prior bilateral ovariectomy OR >12 mo since LMP with no prior hysterectomy)	-32873	Dead	WITH TUMOR		174							Negative		1	174	1	174			1	174
TCGA-AC-A2B8-01	TCGA-AC-A2B8	BRCA	84	FEMALE	WHITE	Stage IIB		Infiltrating Lobular Carcinoma		2011	Post (prior bilateral ovariectomy OR >12 mo since LMP with no prior hysterectomy)	-31003	Alive	TUMOR FREE	677			New Primary Tumor	Other, specify	Rectum	654		Negative		0	677	0	677	0	677	1	654
TCGA-AC-A2BK-01	TCGA-AC-A2BK	BRCA	78	FEMALE	BLACK OR AFRICAN AMERICAN	Stage IIIA		Infiltrating Ductal Carcinoma		2006	Post (prior bilateral ovariectomy OR >12 mo since LMP with no prior hysterectomy)	-28625	Alive	TUMOR FREE	2222								Negative		0	2222	0	2222	0	2222	0	2222
TCGA-AC-A2BM-01	TCGA-AC-A2BM	BRCA	41	FEMALE	BLACK OR AFRICAN AMERICAN	Stage IIB		Infiltrating Ductal Carcinoma		2005		-15212	Alive	TUMOR FREE	3022								Negative		0	3022	0	3022	0	3022	0	3022
TCGA-AC-A2FB-01	TCGA-AC-A2FB	BRCA	65	FEMALE	WHITE	Stage IIA		Infiltrating Lobular Carcinoma		2009		-23851	Alive	TUMOR FREE	1234								Negative		0	1234	0	1234	0	1234	0	1234
TCGA-AC-A2FB-11	TCGA-AC-A2FB	BRCA	65	FEMALE	WHITE	Stage IIA		Infiltrating Lobular Carcinoma		2009		-23851	Alive	TUMOR FREE	1234								Negative		0	1234	0	1234	0	1234	0	1234
TCGA-AC-A2FE-01	TCGA-AC-A2FE	BRCA	62	FEMALE	WHITE	Stage IIIC		Infiltrating Lobular Carcinoma		2005	Post (prior bilateral ovariectomy OR >12 mo since LMP with no prior hysterectomy)	-22746	Dead	WITH TUMOR		2636		Distant Metastasis	Bone		766		Negative		1	2636	1	2636	1	766	1	766
TCGA-AC-A2FF-01	TCGA-AC-A2FF	BRCA	40	FEMALE	ASIAN	Stage IIB		Infiltrating Lobular Carcinoma		2006			Alive	TUMOR FREE	2759								Negative		0	2759	0	2759	0	2759	0	2759
TCGA-AC-A2FF-11	TCGA-AC-A2FF	BRCA	40	FEMALE	ASIAN	Stage IIB		Infiltrating Lobular Carcinoma		2006			Alive	TUMOR FREE	2759								Negative		0	2759	0	2759	0	2759	0	2759
TCGA-AC-A2FG-01	TCGA-AC-A2FG	BRCA	79	FEMALE	WHITE	Stage IIB		Infiltrating Lobular Carcinoma		2007	Post (prior bilateral ovariectomy OR >12 mo since LMP with no prior hysterectomy)	-29211	Alive	TUMOR FREE	1853								Negative		0	1853	0	1853	0	1853	0	1853
TCGA-AC-A2FG-11	TCGA-AC-A2FG	BRCA	79	FEMALE	WHITE	Stage IIB		Infiltrating Lobular Carcinoma		2007	Post (prior bilateral ovariectomy OR >12 mo since LMP with no prior hysterectomy)	-29211	Alive	TUMOR FREE	1853								Negative		0	1853	0	1853	0	1853	0	1853
TCGA-AC-A2FK-01	TCGA-AC-A2FK	BRCA	45	FEMALE	WHITE	Stage IIIC		Infiltrating Lobular Carcinoma		2006		-16627	Alive	TUMOR FREE	2650								Negative		0	2650	0	2650	0	2650	0	2650
TCGA-AC-A2FM-01	TCGA-AC-A2FM	BRCA	87	FEMALE	WHITE	Stage IIB		Infiltrating Lobular Carcinoma		2004	Post (prior bilateral ovariectomy OR >12 mo since LMP with no prior hysterectomy)	-31805	Dead	WITH TUMOR		792		Distant Metastasis	Other, specify	Bone Marrow	780		Negative		1	792	1	792	1	780	1	780
TCGA-AC-A2FM-11	TCGA-AC-A2FM	BRCA	87	FEMALE	WHITE	Stage IIB		Infiltrating Lobular Carcinoma		2004	Post (prior bilateral ovariectomy OR >12 mo since LMP with no prior hysterectomy)	-31805	Dead	WITH TUMOR		792		Distant Metastasis	Other, specify	Bone Marrow	780		Negative		1	792	1	792	1	780	1	780
TCGA-AC-A2FO-01	TCGA-AC-A2FO	BRCA	65	FEMALE	WHITE	Stage IIB		Infiltrating Lobular Carcinoma		2005	Post (prior bilateral ovariectomy OR >12 mo since LMP with no prior hysterectomy)	-23928	Alive	TUMOR FREE	2255								Negative		0	2255	0	2255	0	2255	0	2255
TCGA-AC-A2QH-01	TCGA-AC-A2QH	BRCA	58	FEMALE	WHITE	Stage IIB		Metaplastic Carcinoma		2011	Post (prior bilateral ovariectomy OR >12 mo since LMP with no prior hysterectomy)	-21488	Alive	TUMOR FREE	1005								Negative		0	1005	0	1005	0	1005	0	1005
TCGA-AC-A2QI-01	TCGA-AC-A2QI	BRCA	76	FEMALE	WHITE	Stage IIIA		Infiltrating Lobular Carcinoma		2011	Post (prior bilateral ovariectomy OR >12 mo since LMP with no prior hysterectomy)	-27865	Alive	TUMOR FREE	588								Negative		0	588	0	588	0	588	0	588
TCGA-AC-A2QJ-01	TCGA-AC-A2QJ	BRCA	48	FEMALE	WHITE	Stage IIIB		Metaplastic Carcinoma		2011	Peri (6-12 months since last menstrual period)	-17569	Dead	WITH TUMOR		446		Distant Metastasis	Bone		237		Negative		1	446	1	446	1	237	1	237
TCGA-AC-A3BB-01	TCGA-AC-A3BB	BRCA	46	FEMALE	BLACK OR AFRICAN AMERICAN	Stage IIIA		Infiltrating Lobular Carcinoma		2011		-16983	Alive	TUMOR FREE	987								Negative		0	987	0	987	0	987	0	987
TCGA-AC-A3EH-01	TCGA-AC-A3EH	BRCA	79	FEMALE	WHITE	Stage IIIC		Infiltrating Lobular Carcinoma		2011	Post (prior bilateral ovariectomy OR >12 mo since LMP with no prior hysterectomy)	-29014	Dead	TUMOR FREE		197							Negative		1	197	0	197	0	197	0	197
TCGA-AC-A3HN-01	TCGA-AC-A3HN	BRCA	87	FEMALE	WHITE	Stage IIB		Infiltrating Lobular Carcinoma		2011	Post (prior bilateral ovariectomy OR >12 mo since LMP with no prior hysterectomy)	-32061	Alive	TUMOR FREE	496								Negative		0	496	0	496	0	496	0	496
TCGA-AC-A3OD-01	TCGA-AC-A3OD	BRCA	68	FEMALE	WHITE	Stage IIB		Infiltrating Lobular Carcinoma		2011	Post (prior bilateral ovariectomy OR >12 mo since LMP with no prior hysterectomy)	-25186	Alive	TUMOR FREE	451								Negative		0	451	0	451	0	451	0	451
TCGA-AC-A3QP-01	TCGA-AC-A3QP	BRCA	79	FEMALE	WHITE	Stage IIB		Infiltrating Lobular Carcinoma		2011	Post (prior bilateral ovariectomy OR >12 mo since LMP with no prior hysterectomy)	-29113	Alive	TUMOR FREE	675								Negative		0	675	0	675	0	675	0	675
TCGA-AC-A3QQ-01	TCGA-AC-A3QQ	BRCA	54	FEMALE	WHITE	Stage IA		Infiltrating Lobular Carcinoma		2011	Peri (6-12 months since last menstrual period)	-19723	Alive	TUMOR FREE	734								Close		0	734	0	734			0	734
TCGA-AC-A3TM-01	TCGA-AC-A3TM	BRCA	50	FEMALE	WHITE	Stage IIIA		Infiltrating Lobular Carcinoma		2011	Peri (6-12 months since last menstrual period)	-18535	Alive	TUMOR FREE	762								Negative		0	762	0	762	0	762	0	762
TCGA-AC-A3TN-01	TCGA-AC-A3TN	BRCA	75	FEMALE	WHITE	Stage IIB		Infiltrating Lobular Carcinoma		2012	Post (prior bilateral ovariectomy OR >12 mo since LMP with no prior hysterectomy)	-27421	Alive	TUMOR FREE	456								Negative		0	456	0	456	0	456	0	456
TCGA-AC-A3W5-01	TCGA-AC-A3W5	BRCA	65	FEMALE	BLACK OR AFRICAN AMERICAN	Stage IIA		Infiltrating Lobular Carcinoma		2011	[Not Evaluated]	-24029	Alive	TUMOR FREE	504								Close		0	504	0	504			0	504
TCGA-AC-A3W6-01	TCGA-AC-A3W6	BRCA	90	FEMALE	WHITE	Stage IIIA		Infiltrating Lobular Carcinoma		2012	Post (prior bilateral ovariectomy OR >12 mo since LMP with no prior hysterectomy)	-32872	Alive	TUMOR FREE	602								Negative		0	602	0	602	0	602	0	602
TCGA-AC-A3W7-01	TCGA-AC-A3W7	BRCA	66	FEMALE	WHITE	Stage IIB		Infiltrating Lobular Carcinoma		2012	Post (prior bilateral ovariectomy OR >12 mo since LMP with no prior hysterectomy)	-24327	Alive	TUMOR FREE	471								Negative		0	471	0	471	0	471	0	471
TCGA-AC-A3YI-01	TCGA-AC-A3YI	BRCA	74	FEMALE	WHITE	Stage IIIC		Infiltrating Lobular Carcinoma		2012	Post (prior bilateral ovariectomy OR >12 mo since LMP with no prior hysterectomy)	-27143	Alive	TUMOR FREE	707								Negative		0	707	0	707	0	707	0	707
TCGA-AC-A3YJ-01	TCGA-AC-A3YJ	BRCA	66	FEMALE	WHITE	Stage IIA		Other, specify		2012	Post (prior bilateral ovariectomy OR >12 mo since LMP with no prior hysterectomy)	-24439	Alive	TUMOR FREE	754								Negative		0	754	0	754	0	754	0	754
TCGA-AC-A4ZE-01	TCGA-AC-A4ZE	BRCA	63	FEMALE	WHITE	Stage IIB		Infiltrating Lobular Carcinoma		2012	Post (prior bilateral ovariectomy OR >12 mo since LMP with no prior hysterectomy)	-23284	Alive	TUMOR FREE	890								Negative		0	890	0	890	0	890	0	890
TCGA-AC-A5EH-01	TCGA-AC-A5EH	BRCA	76	FEMALE	BLACK OR AFRICAN AMERICAN	Stage IIB		Infiltrating Ductal Carcinoma		2012		-27964	Alive	TUMOR FREE	511								Negative		0	511	0	511	0	511	0	511
TCGA-AC-A5EI-01	TCGA-AC-A5EI	BRCA	88	FEMALE	WHITE	Stage IB		Other, specify		2012		-32375	Alive	TUMOR FREE	442								Negative		0	442	0	442	0	442	0	442
TCGA-AC-A5XS-01	TCGA-AC-A5XS	BRCA	74	FEMALE	WHITE	Stage IIA		Infiltrating Lobular Carcinoma		2012		-27160	Alive	TUMOR FREE	588								Negative		0	588	0	588	0	588	0	588
TCGA-AC-A5XU-01	TCGA-AC-A5XU	BRCA	74	FEMALE	BLACK OR AFRICAN AMERICAN	Stage IIB		Infiltrating Ductal Carcinoma		2013		-27191	Alive	TUMOR FREE	455								Negative		0	455	0	455	0	455	0	455
TCGA-AC-A62V-01	TCGA-AC-A62V	BRCA	58	MALE	BLACK OR AFRICAN AMERICAN	Stage IV		Infiltrating Ductal Carcinoma		2013	[Not Evaluated]	-21389	Dead	WITH TUMOR		348							Negative		1	348	1	348			1	348
TCGA-AC-A62X-01	TCGA-AC-A62X	BRCA	72	FEMALE	BLACK OR AFRICAN AMERICAN	Stage IIA		Infiltrating Ductal Carcinoma		2013	Post (prior bilateral ovariectomy OR >12 mo since LMP with no prior hysterectomy)	-26627	Alive	TUMOR FREE	417								Negative		0	417	0	417	0	417	0	417
TCGA-AC-A62Y-01	TCGA-AC-A62Y	BRCA	79	FEMALE	WHITE	Stage IIB		Infiltrating Lobular Carcinoma		2012	Post (prior bilateral ovariectomy OR >12 mo since LMP with no prior hysterectomy)	-28876	Alive	TUMOR FREE	530								Positive		0	530	0	530			0	530
TCGA-AC-A6IV-01	TCGA-AC-A6IV	BRCA	47	FEMALE	WHITE	Stage IIB		Infiltrating Lobular Carcinoma		2012		-17521	Alive	TUMOR FREE	568								Negative		0	568	0	568	0	568	0	568
TCGA-AC-A6IW-01	TCGA-AC-A6IW	BRCA	73	FEMALE	BLACK OR AFRICAN AMERICAN	Stage IIA		Infiltrating Ductal Carcinoma		2013	Post (prior bilateral ovariectomy OR >12 mo since LMP with no prior hysterectomy)	-26896	Alive	TUMOR FREE	413								Negative		0	413	0	413	0	413	0	413
TCGA-AC-A6IX-06	TCGA-AC-A6IX	BRCA	49	FEMALE	WHITE	Stage IIIC		Infiltrating Lobular Carcinoma		2013	Peri (6-12 months since last menstrual period)	-17969	Alive	TUMOR FREE	373								Negative		0	373	0	373	0	373	0	373
TCGA-AC-A6IX-01	TCGA-AC-A6IX	BRCA	49	FEMALE	WHITE	Stage IIIC		Infiltrating Lobular Carcinoma		2013	Peri (6-12 months since last menstrual period)	-17969	Alive	TUMOR FREE	373								Negative		0	373	0	373	0	373	0	373
TCGA-AC-A6NO-01	TCGA-AC-A6NO	BRCA	43	FEMALE	BLACK OR AFRICAN AMERICAN	Stage IIB		Infiltrating Ductal Carcinoma		2011	[Unknown]	-15996	Alive	TUMOR FREE	51								Negative		0	51	0	51	0	51	0	51
TCGA-AC-A7VB-01	TCGA-AC-A7VB	BRCA	51	FEMALE	BLACK OR AFRICAN AMERICAN	Stage IIA		Infiltrating Ductal Carcinoma		2013	[Unknown]	-18806	Alive	TUMOR FREE	250								Negative		0	250	0	250	0	250	0	250
TCGA-AC-A7VC-01	TCGA-AC-A7VC	BRCA	56	FEMALE	WHITE	Stage IIB		Metaplastic Carcinoma		2013	Post (prior bilateral ovariectomy OR >12 mo since LMP with no prior hysterectomy)	-20479	Alive	TUMOR FREE	1								Negative		0	1	0	1	0	1	0	1
TCGA-AC-A8OP-01	TCGA-AC-A8OP	BRCA	72	FEMALE	BLACK OR AFRICAN AMERICAN	Stage IA		Infiltrating Ductal Carcinoma		2011	Post (prior bilateral ovariectomy OR >12 mo since LMP with no prior hysterectomy)	-26550	Alive	TUMOR FREE	614								Negative		0	614	0	614	0	614	0	614
TCGA-AC-A8OQ-01	TCGA-AC-A8OQ	BRCA	72	FEMALE	BLACK OR AFRICAN AMERICAN	Stage IIB		Infiltrating Ductal Carcinoma		2011	Post (prior bilateral ovariectomy OR >12 mo since LMP with no prior hysterectomy)	-26535	Alive	TUMOR FREE	34								Negative		0	34	0	34	0	34	0	34
TCGA-AC-A8OR-01	TCGA-AC-A8OR	BRCA	75	FEMALE	WHITE	Stage IA		Mucinous Carcinoma		2013	Post (prior bilateral ovariectomy OR >12 mo since LMP with no prior hysterectomy)	-27605	Alive	TUMOR FREE	40								Negative		0	40	0	40	0	40	0	40
TCGA-AC-A8OS-01	TCGA-AC-A8OS	BRCA	71	FEMALE	WHITE	Stage IIA		Infiltrating Lobular Carcinoma		2013	Post (prior bilateral ovariectomy OR >12 mo since LMP with no prior hysterectomy)	-26248	Alive	TUMOR FREE	70								Negative		0	70	0	70	0	70	0	70
TCGA-AN-A03X-01	TCGA-AN-A03X	BRCA	74	FEMALE	WHITE	Stage IIA		Infiltrating Ductal Carcinoma		2010	Post (prior bilateral ovariectomy OR >12 mo since LMP with no prior hysterectomy)	-27163	Alive	TUMOR FREE	10								Negative		0	10	0	10	0	10	0	10
TCGA-AN-A03Y-01	TCGA-AN-A03Y	BRCA	66	FEMALE	WHITE	Stage IIA		Infiltrating Ductal Carcinoma		2010	Post (prior bilateral ovariectomy OR >12 mo since LMP with no prior hysterectomy)	-24232	Alive	TUMOR FREE	10								Negative		0	10	0	10	0	10	0	10
TCGA-AN-A041-01	TCGA-AN-A041	BRCA	29	FEMALE	WHITE	Stage IIB		Infiltrating Ductal Carcinoma		2010	Pre (<6 months since LMP AND no prior bilateral ovariectomy AND not on estrogen replacement)	-10812	Alive	TUMOR FREE	7								Negative		0	7	0	7	0	7	0	7
TCGA-AN-A046-01	TCGA-AN-A046	BRCA	68	FEMALE	WHITE	Stage IIA		Infiltrating Ductal Carcinoma		2010	Post (prior bilateral ovariectomy OR >12 mo since LMP with no prior hysterectomy)	-25158	Alive	TUMOR FREE	10								Negative		0	10	0	10	0	10	0	10
TCGA-AN-A049-01	TCGA-AN-A049	BRCA	62	FEMALE	WHITE	Stage IIA		Infiltrating Ductal Carcinoma		2008	Post (prior bilateral ovariectomy OR >12 mo since LMP with no prior hysterectomy)	-22710	Alive	TUMOR FREE	19								Positive		0	19	0	19			0	19
TCGA-AN-A04A-01	TCGA-AN-A04A	BRCA	36	FEMALE	WHITE	Stage IIIA		Infiltrating Ductal Carcinoma		2008	Peri (6-12 months since last menstrual period)	-13445	Alive	TUMOR FREE	90								Positive		0	90	0	90			0	90
TCGA-AN-A04C-01	TCGA-AN-A04C	BRCA	51	FEMALE	WHITE	Stage IIB		Infiltrating Ductal Carcinoma		2008	Post (prior bilateral ovariectomy OR >12 mo since LMP with no prior hysterectomy)	-18851	Alive	TUMOR FREE	54								Positive		0	54	0	54			0	54
TCGA-AN-A04D-01	TCGA-AN-A04D	BRCA	58	FEMALE	WHITE	Stage IIB		Infiltrating Ductal Carcinoma		2008	Post (prior bilateral ovariectomy OR >12 mo since LMP with no prior hysterectomy)	-21426	Alive	TUMOR FREE	52								Positive		0	52	0	52			0	52
TCGA-AN-A0AJ-01	TCGA-AN-A0AJ	BRCA	79	FEMALE	WHITE	Stage IIB		Infiltrating Ductal Carcinoma		2010	Post (prior bilateral ovariectomy OR >12 mo since LMP with no prior hysterectomy)	-29131	Alive	TUMOR FREE	303								Negative		0	303	0	303	0	303	0	303
TCGA-AN-A0AK-01	TCGA-AN-A0AK	BRCA	76	FEMALE	WHITE	Stage IIA		Infiltrating Ductal Carcinoma		2010	Post (prior bilateral ovariectomy OR >12 mo since LMP with no prior hysterectomy)	-27977	Alive	TUMOR FREE	224								Negative		0	224	0	224	0	224	0	224
TCGA-AN-A0AL-01	TCGA-AN-A0AL	BRCA	41	FEMALE	WHITE	Stage IIIB		Infiltrating Ductal Carcinoma		2010	Pre (<6 months since LMP AND no prior bilateral ovariectomy AND not on estrogen replacement)	-15286	Alive	TUMOR FREE	227								Negative		0	227	0	227	0	227	0	227
TCGA-AN-A0AM-01	TCGA-AN-A0AM	BRCA	56	FEMALE	WHITE	Stage IIA		Infiltrating Ductal Carcinoma		2010	Post (prior bilateral ovariectomy OR >12 mo since LMP with no prior hysterectomy)	-20713	Alive	TUMOR FREE	5								Negative		0	5	0	5	0	5	0	5
TCGA-AN-A0AR-01	TCGA-AN-A0AR	BRCA	55	FEMALE	WHITE	Stage IIA		Infiltrating Ductal Carcinoma		2010	Pre (<6 months since LMP AND no prior bilateral ovariectomy AND not on estrogen replacement)	-20152	Alive	TUMOR FREE	10								Negative		0	10	0	10	0	10	0	10
TCGA-AN-A0AS-01	TCGA-AN-A0AS	BRCA	70	FEMALE	WHITE	Stage IIIA		Infiltrating Ductal Carcinoma		2010	Post (prior bilateral ovariectomy OR >12 mo since LMP with no prior hysterectomy)	-25658	Alive	TUMOR FREE	10								Negative		0	10	0	10	0	10	0	10
TCGA-AN-A0AT-01	TCGA-AN-A0AT	BRCA	62	FEMALE	WHITE	Stage IIA		Infiltrating Ductal Carcinoma		2010	Post (prior bilateral ovariectomy OR >12 mo since LMP with no prior hysterectomy)	-22798	Alive	TUMOR FREE	10								Negative		0	10	0	10	0	10	0	10
TCGA-AN-A0FD-01	TCGA-AN-A0FD	BRCA	71	FEMALE	WHITE	Stage IIA		Infiltrating Ductal Carcinoma		2010	Post (prior bilateral ovariectomy OR >12 mo since LMP with no prior hysterectomy)	-26007	Alive	TUMOR FREE	196								Negative		0	196	0	196	0	196	0	196
TCGA-AN-A0FF-01	TCGA-AN-A0FF	BRCA	32	FEMALE	WHITE	Stage IA		Infiltrating Ductal Carcinoma		2010	Pre (<6 months since LMP AND no prior bilateral ovariectomy AND not on estrogen replacement)	-11929	Alive	TUMOR FREE	172								Negative		0	172	0	172	0	172	0	172
TCGA-AN-A0FJ-01	TCGA-AN-A0FJ	BRCA	59	FEMALE	WHITE	Stage IV		Infiltrating Ductal Carcinoma		2010	Peri (6-12 months since last menstrual period)	-21910	Alive	TUMOR FREE	242								Negative		0	242	0	242			0	242
TCGA-AN-A0FK-01	TCGA-AN-A0FK	BRCA	88	FEMALE	WHITE	Stage IIIB		Infiltrating Ductal Carcinoma		2010	Post (prior bilateral ovariectomy OR >12 mo since LMP with no prior hysterectomy)	-32462	Alive	TUMOR FREE	213								Negative		0	213	0	213	0	213	0	213
TCGA-AN-A0FL-01	TCGA-AN-A0FL	BRCA	62	FEMALE	WHITE	Stage IIA		Infiltrating Ductal Carcinoma		2010	Post (prior bilateral ovariectomy OR >12 mo since LMP with no prior hysterectomy)	-22805	Alive	TUMOR FREE	231								Negative		0	231	0	231	0	231	0	231
TCGA-AN-A0FN-01	TCGA-AN-A0FN	BRCA	61	FEMALE	WHITE	Stage IA		Infiltrating Lobular Carcinoma		2010	Post (prior bilateral ovariectomy OR >12 mo since LMP with no prior hysterectomy)	-22629	Alive	TUMOR FREE	218								Negative		0	218	0	218	0	218	0	218
TCGA-AN-A0FS-01	TCGA-AN-A0FS	BRCA	55	FEMALE	WHITE	Stage IA		Infiltrating Lobular Carcinoma		2010	Peri (6-12 months since last menstrual period)	-20352	Alive	TUMOR FREE	210								Negative		0	210	0	210	0	210	0	210
TCGA-AN-A0FT-01	TCGA-AN-A0FT	BRCA	63	FEMALE	WHITE	Stage IIB		Infiltrating Ductal Carcinoma		2010	Post (prior bilateral ovariectomy OR >12 mo since LMP with no prior hysterectomy)	-23300	Alive	TUMOR FREE	214								Negative		0	214	0	214	0	214	0	214
TCGA-AN-A0FV-01	TCGA-AN-A0FV	BRCA	58	FEMALE	WHITE	Stage IIA		Infiltrating Ductal Carcinoma		2010	Post (prior bilateral ovariectomy OR >12 mo since LMP with no prior hysterectomy)	-21479	Alive	TUMOR FREE	10								Negative		0	10	0	10	0	10	0	10
TCGA-AN-A0FW-01	TCGA-AN-A0FW	BRCA	67	FEMALE	WHITE	Stage IIIA		Infiltrating Ductal Carcinoma		2010	Post (prior bilateral ovariectomy OR >12 mo since LMP with no prior hysterectomy)	-24692	Alive	TUMOR FREE	11								Negative		0	11	0	11	0	11	0	11
TCGA-AN-A0FX-01	TCGA-AN-A0FX	BRCA	52	FEMALE	WHITE	Stage IIA		Infiltrating Ductal Carcinoma		2010	Post (prior bilateral ovariectomy OR >12 mo since LMP with no prior hysterectomy)	-19309	Alive	TUMOR FREE	10								Negative		0	10	0	10	0	10	0	10
TCGA-AN-A0FY-01	TCGA-AN-A0FY	BRCA	55	FEMALE	WHITE	Stage IA		Infiltrating Ductal Carcinoma		2010	Post (prior bilateral ovariectomy OR >12 mo since LMP with no prior hysterectomy)	-20347	Alive	TUMOR FREE	10								Negative		0	10	0	10	0	10	0	10
TCGA-AN-A0FZ-01	TCGA-AN-A0FZ	BRCA	45	FEMALE	WHITE	Stage IIIA		Infiltrating Ductal Carcinoma		2010	Pre (<6 months since LMP AND no prior bilateral ovariectomy AND not on estrogen replacement)	-16533	Alive	TUMOR FREE	10								Negative		0	10	0	10	0	10	0	10
TCGA-AN-A0G0-01	TCGA-AN-A0G0	BRCA	56	FEMALE	WHITE	Stage IIA		Infiltrating Ductal Carcinoma		2010	Post (prior bilateral ovariectomy OR >12 mo since LMP with no prior hysterectomy)	-20504	Alive	TUMOR FREE	16								Negative		0	16	0	16	0	16	0	16
TCGA-AN-A0XL-01	TCGA-AN-A0XL	BRCA	61	FEMALE	WHITE	Stage IIA		Infiltrating Ductal Carcinoma		2010	Post (prior bilateral ovariectomy OR >12 mo since LMP with no prior hysterectomy)	-22341	Alive	TUMOR FREE	163								Negative		0	163	0	163	0	163	0	163
TCGA-AN-A0XN-01	TCGA-AN-A0XN	BRCA	68	FEMALE	WHITE	Stage IIIA		Infiltrating Ductal Carcinoma		2010	Post (prior bilateral ovariectomy OR >12 mo since LMP with no prior hysterectomy)	-25029	Alive	TUMOR FREE	10								Negative		0	10	0	10	0	10	0	10
TCGA-AN-A0XO-01	TCGA-AN-A0XO	BRCA	59	FEMALE	WHITE	Stage IIIA		Infiltrating Ductal Carcinoma		2010	Post (prior bilateral ovariectomy OR >12 mo since LMP with no prior hysterectomy)	-21640	Alive	TUMOR FREE	375								Negative		0	375	0	375	0	375	0	375
TCGA-AN-A0XP-01	TCGA-AN-A0XP	BRCA	69	FEMALE	WHITE	Stage IIIA		Infiltrating Ductal Carcinoma		2010	Post (prior bilateral ovariectomy OR >12 mo since LMP with no prior hysterectomy)	-25305	Alive	TUMOR FREE	9								Negative		0	9	0	9	0	9	0	9
TCGA-AN-A0XR-01	TCGA-AN-A0XR	BRCA	55	FEMALE	WHITE	Stage IIIA		Infiltrating Ductal Carcinoma		2010	Post (prior bilateral ovariectomy OR >12 mo since LMP with no prior hysterectomy)	-20381	Alive	TUMOR FREE	10								Negative		0	10	0	10	0	10	0	10
TCGA-AN-A0XS-01	TCGA-AN-A0XS	BRCA	63	FEMALE	WHITE	Stage IIIA		Infiltrating Ductal Carcinoma		2010	Post (prior bilateral ovariectomy OR >12 mo since LMP with no prior hysterectomy)	-23358	Alive	TUMOR FREE	10								Negative		0	10	0	10	0	10	0	10
TCGA-AN-A0XT-01	TCGA-AN-A0XT	BRCA	54	FEMALE	WHITE	Stage IIIA		Infiltrating Ductal Carcinoma		2010	Post (prior bilateral ovariectomy OR >12 mo since LMP with no prior hysterectomy)	-19794	Alive	TUMOR FREE	10								Negative		0	10	0	10	0	10	0	10
TCGA-AN-A0XU-01	TCGA-AN-A0XU	BRCA	54	FEMALE	WHITE	Stage IIA		Infiltrating Ductal Carcinoma		2010	Post (prior bilateral ovariectomy OR >12 mo since LMP with no prior hysterectomy)	-20052	Alive	TUMOR FREE	10								Negative		0	10	0	10	0	10	0	10
TCGA-AN-A0XV-01	TCGA-AN-A0XV	BRCA	67	FEMALE	WHITE	Stage IIIA		Infiltrating Ductal Carcinoma		2010	Post (prior bilateral ovariectomy OR >12 mo since LMP with no prior hysterectomy)	-24779	Alive	TUMOR FREE	162								Negative		0	162	0	162	0	162	0	162
TCGA-AN-A0XW-01	TCGA-AN-A0XW	BRCA	36	FEMALE	WHITE	Stage IIIA		Infiltrating Ductal Carcinoma		2010	Pre (<6 months since LMP AND no prior bilateral ovariectomy AND not on estrogen replacement)	-13208	Alive	TUMOR FREE	170								Negative		0	170	0	170	0	170	0	170
TCGA-AO-A03L-01	TCGA-AO-A03L	BRCA	34	FEMALE	ASIAN	Stage IIIA		Infiltrating Ductal Carcinoma		2003	Pre (<6 months since LMP AND no prior bilateral ovariectomy AND not on estrogen replacement)	-12443	Alive	TUMOR FREE	2442								Negative		0	2442	0	2442	0	2442	0	2442
TCGA-AO-A03M-01	TCGA-AO-A03M	BRCA	29	FEMALE	WHITE	Stage I		Infiltrating Ductal Carcinoma		2006	Pre (<6 months since LMP AND no prior bilateral ovariectomy AND not on estrogen replacement)	-10616	Alive	TUMOR FREE	1866								Negative		0	1866	0	1866	0	1866	0	1866
TCGA-AO-A03N-01	TCGA-AO-A03N	BRCA	59	FEMALE	WHITE	Stage IIB		Infiltrating Ductal Carcinoma		2006	Post (prior bilateral ovariectomy OR >12 mo since LMP with no prior hysterectomy)	-21816	Alive	WITH TUMOR	2031			Locoregional Disease			1645		Negative		0	2031	0	2031	1	1645	1	1645
TCGA-AO-A03O-01	TCGA-AO-A03O	BRCA	69	FEMALE	BLACK OR AFRICAN AMERICAN	Stage IIA		Infiltrating Ductal Carcinoma		2002	Post (prior bilateral ovariectomy OR >12 mo since LMP with no prior hysterectomy)	-25362	Dead	TUMOR FREE		2483							Negative		1	2483	0	2483	0	2483	0	2483
TCGA-AO-A03P-01	TCGA-AO-A03P	BRCA	54	FEMALE	BLACK OR AFRICAN AMERICAN	Stage IIB		Infiltrating Ductal Carcinoma		2003	Post (prior bilateral ovariectomy OR >12 mo since LMP with no prior hysterectomy)	-19724	Dead	WITH TUMOR		2911		Distant Metastasis	Liver		1922		Close		1	2911	1	2911			1	1922
TCGA-AO-A03R-01	TCGA-AO-A03R	BRCA	57	FEMALE	WHITE	Stage IIB		Infiltrating Ductal Carcinoma		2005	Post (prior bilateral ovariectomy OR >12 mo since LMP with no prior hysterectomy)	-20930	Alive	TUMOR FREE	2091								Negative		0	2091	0	2091	0	2091	0	2091
TCGA-AO-A03T-01	TCGA-AO-A03T	BRCA	42	FEMALE	WHITE	Stage IIB		Infiltrating Ductal Carcinoma		2007	Pre (<6 months since LMP AND no prior bilateral ovariectomy AND not on estrogen replacement)	-15540	Alive	TUMOR FREE	2124								Negative		0	2124	0	2124	0	2124	0	2124
TCGA-AO-A03U-01	TCGA-AO-A03U	BRCA	31	FEMALE	WHITE	Stage I		Other, specify		2001	Pre (<6 months since LMP AND no prior bilateral ovariectomy AND not on estrogen replacement)	-11354	Dead	TUMOR FREE		1793		New Primary Tumor	Lung		1614		Negative		1	1793	0	1793	0	1793	1	1614
TCGA-AO-A03V-01	TCGA-AO-A03V	BRCA	41	FEMALE	WHITE	Stage I		Infiltrating Ductal Carcinoma		2008	Peri (6-12 months since last menstrual period)	-15284	Alive	TUMOR FREE	1351								Negative		0	1351	0	1351	0	1351	0	1351
TCGA-AO-A0J2-01	TCGA-AO-A0J2	BRCA	41	FEMALE	WHITE	Stage IA		Infiltrating Ductal Carcinoma		2008	Pre (<6 months since LMP AND no prior bilateral ovariectomy AND not on estrogen replacement)	-15324	Alive	TUMOR FREE	997								Negative		0	997	0	997	0	997	0	997
TCGA-AO-A0J3-01	TCGA-AO-A0J3	BRCA	67	FEMALE	WHITE	Stage IIB		Other, specify		2009	Post (prior bilateral ovariectomy OR >12 mo since LMP with no prior hysterectomy)	-24519	Alive	TUMOR FREE	651								Negative		0	651	0	651	0	651	0	651
TCGA-AO-A0J4-01	TCGA-AO-A0J4	BRCA	41	FEMALE	BLACK OR AFRICAN AMERICAN	Stage IA		Infiltrating Ductal Carcinoma		2009	Pre (<6 months since LMP AND no prior bilateral ovariectomy AND not on estrogen replacement)	-15052	Alive	TUMOR FREE	1587								Negative		0	1587	0	1587	0	1587	0	1587
TCGA-AO-A0J5-01	TCGA-AO-A0J5	BRCA	48	FEMALE	WHITE	Stage IV		Other, specify		2008	Pre (<6 months since LMP AND no prior bilateral ovariectomy AND not on estrogen replacement)	-17815	Dead	WITH TUMOR		792							Close		1	792	1	792			1	792
TCGA-AO-A0J6-01	TCGA-AO-A0J6	BRCA	61	FEMALE	WHITE	Stage IIA		Infiltrating Ductal Carcinoma		2008	Post (prior bilateral ovariectomy OR >12 mo since LMP with no prior hysterectomy)	-22462	Alive	TUMOR FREE	1140								Negative		0	1140	0	1140	0	1140	0	1140
TCGA-AO-A0J7-01	TCGA-AO-A0J7	BRCA	71	FEMALE	WHITE	Stage IIB		Other, specify		2009	Post (prior bilateral ovariectomy OR >12 mo since LMP with no prior hysterectomy)	-26281	Alive	TUMOR FREE	618								Negative		0	618	0	618	0	618	0	618
TCGA-AO-A0J8-01	TCGA-AO-A0J8	BRCA	61	FEMALE	WHITE	Stage IIA		Infiltrating Lobular Carcinoma		2009	Post (prior bilateral ovariectomy OR >12 mo since LMP with no prior hysterectomy)	-22284	Alive	TUMOR FREE	680								Negative		0	680	0	680	0	680	0	680
TCGA-AO-A0J9-01	TCGA-AO-A0J9	BRCA	61	FEMALE	WHITE	Stage IIIC		Infiltrating Lobular Carcinoma		2007	Post (prior bilateral ovariectomy OR >12 mo since LMP with no prior hysterectomy)	-22642	Alive	WITH TUMOR	1613			Distant Metastasis	Bone		1066		Negative		0	1613	0	1613	1	1066	1	1066
TCGA-AO-A0JA-01	TCGA-AO-A0JA	BRCA	36	FEMALE	BLACK OR AFRICAN AMERICAN	Stage IIIC		Infiltrating Ductal Carcinoma		2009	Pre (<6 months since LMP AND no prior bilateral ovariectomy AND not on estrogen replacement)	-13307	Alive	WITH TUMOR	655			Distant Metastasis	Bone		143		Negative		0	655	0	655	1	143	1	143
TCGA-AO-A0JB-01	TCGA-AO-A0JB	BRCA	50	FEMALE	WHITE	Stage IIIA		Infiltrating Ductal Carcinoma		2007	Pre (<6 months since LMP AND no prior bilateral ovariectomy AND not on estrogen replacement)	-18561	Alive	TUMOR FREE	1542								Negative		0	1542	0	1542	0	1542	0	1542
TCGA-AO-A0JC-01	TCGA-AO-A0JC	BRCA	64	FEMALE	WHITE	Stage IIA		Infiltrating Ductal Carcinoma		2006	Post (prior bilateral ovariectomy OR >12 mo since LMP with no prior hysterectomy)	-23404	Alive	TUMOR FREE	1547								Negative		0	1547	0	1547	0	1547	0	1547
TCGA-AO-A0JD-01	TCGA-AO-A0JD	BRCA	59	FEMALE	WHITE	Stage IIIA		Infiltrating Ductal Carcinoma		2005	Post (prior bilateral ovariectomy OR >12 mo since LMP with no prior hysterectomy)	-21831	Alive	TUMOR FREE	2190								Negative		0	2190	0	2190	0	2190	0	2190
TCGA-AO-A0JE-01	TCGA-AO-A0JE	BRCA	53	FEMALE	BLACK OR AFRICAN AMERICAN	Stage IIIA		Infiltrating Ductal Carcinoma		2005	Post (prior bilateral ovariectomy OR >12 mo since LMP with no prior hysterectomy)	-19516	Alive	TUMOR FREE	2335								Positive		0	2335	0	2335			0	2335
TCGA-AO-A0JF-01	TCGA-AO-A0JF	BRCA	68	FEMALE	WHITE	Stage IIA		Infiltrating Ductal Carcinoma		2009	Post (prior bilateral ovariectomy OR >12 mo since LMP with no prior hysterectomy)	-24923	Alive	TUMOR FREE	1980								Negative		0	1980	0	1980	0	1980	0	1980
TCGA-AO-A0JG-01	TCGA-AO-A0JG	BRCA	49	FEMALE	WHITE	Stage IIIA		Other, specify		2009	Post (prior bilateral ovariectomy OR >12 mo since LMP with no prior hysterectomy)	-18021	Alive	TUMOR FREE	798								Close		0	798	0	798			0	798
TCGA-AO-A0JI-01	TCGA-AO-A0JI	BRCA	56	FEMALE	WHITE	Stage IIA		Infiltrating Ductal Carcinoma		2007	Post (prior bilateral ovariectomy OR >12 mo since LMP with no prior hysterectomy)	-20694	Alive	TUMOR FREE	1528								Negative		0	1528	0	1528	0	1528	0	1528
TCGA-AO-A0JJ-01	TCGA-AO-A0JJ	BRCA	54	FEMALE	WHITE	Stage IIB		Infiltrating Lobular Carcinoma		2006	Post (prior bilateral ovariectomy OR >12 mo since LMP with no prior hysterectomy)	-19758	Alive	TUMOR FREE	1887								Negative		0	1887	0	1887	0	1887	0	1887
TCGA-AO-A0JL-01	TCGA-AO-A0JL	BRCA	59	FEMALE	WHITE	Stage IIIA		Infiltrating Ductal Carcinoma		2006	Post (prior bilateral ovariectomy OR >12 mo since LMP with no prior hysterectomy)	-21895	Alive	TUMOR FREE	1683								Negative		0	1683	0	1683	0	1683	0	1683
TCGA-AO-A0JM-01	TCGA-AO-A0JM	BRCA	40	FEMALE		Stage IIB		Infiltrating Ductal Carcinoma		2005	Pre (<6 months since LMP AND no prior bilateral ovariectomy AND not on estrogen replacement)	-14653	Alive	TUMOR FREE	2184								Negative		0	2184	0	2184	0	2184	0	2184
TCGA-AO-A124-01	TCGA-AO-A124	BRCA	38	FEMALE	WHITE	Stage IIA		Other, specify		2002	Pre (<6 months since LMP AND no prior bilateral ovariectomy AND not on estrogen replacement)	-14174	Alive	TUMOR FREE	3506								Negative		0	3506	0	3506	0	3506	0	3506
TCGA-AO-A125-01	TCGA-AO-A125	BRCA	72	FEMALE	BLACK OR AFRICAN AMERICAN	Stage IIA		Other, specify		2002	Post (prior bilateral ovariectomy OR >12 mo since LMP with no prior hysterectomy)	-26466	Alive	TUMOR FREE	3456								Negative		0	3456	0	3456	0	3456	0	3456
TCGA-AO-A126-01	TCGA-AO-A126	BRCA	39	FEMALE	ASIAN	Stage IIA		Infiltrating Ductal Carcinoma		2002	Pre (<6 months since LMP AND no prior bilateral ovariectomy AND not on estrogen replacement)	-14264	Alive	TUMOR FREE	3307			Locoregional Disease			267		Negative		0	3307	0	3307	1	267	1	267
TCGA-AO-A128-01	TCGA-AO-A128	BRCA	61	FEMALE	WHITE	Stage IIA		Infiltrating Ductal Carcinoma		2002	Post (prior bilateral ovariectomy OR >12 mo since LMP with no prior hysterectomy)	-22340	Alive	TUMOR FREE	3248								Negative		0	3248	0	3248	0	3248	0	3248
TCGA-AO-A129-01	TCGA-AO-A129	BRCA	29	FEMALE	WHITE	Stage IIB		Infiltrating Ductal Carcinoma		2002	Pre (<6 months since LMP AND no prior bilateral ovariectomy AND not on estrogen replacement)	-10898	Alive	TUMOR FREE	3286								Negative		0	3286	0	3286	0	3286	0	3286
TCGA-AO-A12A-01	TCGA-AO-A12A	BRCA	47	FEMALE	WHITE	Stage IIA		Infiltrating Ductal Carcinoma		2003	Pre (<6 months since LMP AND no prior bilateral ovariectomy AND not on estrogen replacement)	-17420	Alive	TUMOR FREE	3112								Close		0	3112	0	3112			0	3112
TCGA-AO-A12B-01	TCGA-AO-A12B	BRCA	63	FEMALE	WHITE	Stage IIA		Infiltrating Ductal Carcinoma		2004	Post (prior bilateral ovariectomy OR >12 mo since LMP with no prior hysterectomy)	-23150	Alive	TUMOR FREE	2989								Negative		0	2989	0	2989	0	2989	0	2989
TCGA-AO-A12C-01	TCGA-AO-A12C	BRCA	42	FEMALE	WHITE	Stage IIB		Infiltrating Ductal Carcinoma		2005	Pre (<6 months since LMP AND no prior bilateral ovariectomy AND not on estrogen replacement)	-15469	Alive	TUMOR FREE	2372								Negative		0	2372	0	2372	0	2372	0	2372
TCGA-AO-A12D-01	TCGA-AO-A12D	BRCA	43	FEMALE	WHITE	Stage IIA		Infiltrating Ductal Carcinoma		2005	Pre (<6 months since LMP AND no prior bilateral ovariectomy AND not on estrogen replacement)	-15774	Alive	TUMOR FREE	2515								Negative		0	2515	0	2515	0	2515	0	2515
TCGA-AO-A12E-01	TCGA-AO-A12E	BRCA	51	FEMALE	WHITE	Stage IIB		Infiltrating Lobular Carcinoma		2005	Pre (<6 months since LMP AND no prior bilateral ovariectomy AND not on estrogen replacement)	-18721	Alive	TUMOR FREE	2142								Negative		0	2142	0	2142	0	2142	0	2142
TCGA-AO-A12F-01	TCGA-AO-A12F	BRCA	36	FEMALE	WHITE	Stage IIA		Infiltrating Ductal Carcinoma		2006	Pre (<6 months since LMP AND no prior bilateral ovariectomy AND not on estrogen replacement)	-13409	Alive	TUMOR FREE	1842								Negative		0	1842	0	1842	0	1842	0	1842
TCGA-AO-A12G-01	TCGA-AO-A12G	BRCA	75	FEMALE	WHITE	Stage IIA		Other, specify		2006	Post (prior bilateral ovariectomy OR >12 mo since LMP with no prior hysterectomy)	-27705	Alive	TUMOR FREE	1639								Negative		0	1639	0	1639	0	1639	0	1639
TCGA-AO-A12H-01	TCGA-AO-A12H	BRCA	69	FEMALE	BLACK OR AFRICAN AMERICAN	Stage IIA		Other, specify		2008	Pre (<6 months since LMP AND no prior bilateral ovariectomy AND not on estrogen replacement)	-25515	Alive	TUMOR FREE	1234								Negative		0	1234	0	1234	0	1234	0	1234
TCGA-AO-A1KO-01	TCGA-AO-A1KO	BRCA	46	FEMALE	WHITE	Stage IIB		Infiltrating Lobular Carcinoma		2008	Pre (<6 months since LMP AND no prior bilateral ovariectomy AND not on estrogen replacement)	-16817	Alive	TUMOR FREE	622								Negative		0	622	0	622	0	622	0	622
TCGA-AO-A1KP-01	TCGA-AO-A1KP	BRCA	77	FEMALE	WHITE	Stage IIA		Infiltrating Ductal Carcinoma		2003	Post (prior bilateral ovariectomy OR >12 mo since LMP with no prior hysterectomy)	-28247	Alive	TUMOR FREE	2953								Negative		0	2953	0	2953	0	2953	0	2953
TCGA-AO-A1KQ-01	TCGA-AO-A1KQ	BRCA	84	MALE	WHITE	Stage IIIB		Infiltrating Ductal Carcinoma		2006		-30859	Alive	TUMOR FREE	1882								Negative		0	1882	0	1882	0	1882	0	1882
TCGA-AO-A1KR-01	TCGA-AO-A1KR	BRCA	51	FEMALE	WHITE	Stage IIA		Infiltrating Ductal Carcinoma		2005	Pre (<6 months since LMP AND no prior bilateral ovariectomy AND not on estrogen replacement)	-18900	Alive	TUMOR FREE	2513								Negative		0	2513	0	2513	0	2513	0	2513
TCGA-AO-A1KS-01	TCGA-AO-A1KS	BRCA	69	FEMALE	WHITE	Stage IIA		Infiltrating Lobular Carcinoma		2010	Post (prior bilateral ovariectomy OR >12 mo since LMP with no prior hysterectomy)	-25230	Alive	TUMOR FREE	350								Negative		0	350	0	350	0	350	0	350
TCGA-AO-A1KT-01	TCGA-AO-A1KT	BRCA	78	FEMALE	WHITE	Stage IIA		Infiltrating Ductal Carcinoma		2009	Post (prior bilateral ovariectomy OR >12 mo since LMP with no prior hysterectomy)	-28660	Alive	TUMOR FREE	541								Negative		0	541	0	541	0	541	0	541
TCGA-AQ-A04H-01	TCGA-AQ-A04H	BRCA	61	FEMALE	WHITE	Stage IIIA		Infiltrating Ductal Carcinoma		2009	Post (prior bilateral ovariectomy OR >12 mo since LMP with no prior hysterectomy)	-22539	Alive	TUMOR FREE	754								Negative		0	754	0	754	0	754	0	754
TCGA-AQ-A04J-01	TCGA-AQ-A04J	BRCA	45	FEMALE	WHITE	Stage IIA		Infiltrating Ductal Carcinoma		2009	Pre (<6 months since LMP AND no prior bilateral ovariectomy AND not on estrogen replacement)	-16615	Alive	TUMOR FREE	819								Negative		0	819	0	819	0	819	0	819
TCGA-AQ-A04L-01	TCGA-AQ-A04L	BRCA	48	FEMALE	WHITE	Stage IIA		Infiltrating Ductal Carcinoma		2001	Peri (6-12 months since last menstrual period)	-17759	Alive	TUMOR FREE	3957								Negative		0	3957	0	3957	0	3957	0	3957
TCGA-AQ-A0Y5-01	TCGA-AQ-A0Y5	BRCA	70	FEMALE	WHITE	Stage IIIA		Infiltrating Ductal Carcinoma		2010	Post (prior bilateral ovariectomy OR >12 mo since LMP with no prior hysterectomy)	-25793	Dead	TUMOR FREE		172							Negative		1	172	0	172	0	172	0	172
TCGA-AQ-A1H2-01	TCGA-AQ-A1H2	BRCA	84	FEMALE	WHITE	Stage IIIA		Infiltrating Ductal Carcinoma		2010	Post (prior bilateral ovariectomy OR >12 mo since LMP with no prior hysterectomy)	-30958	Alive	TUMOR FREE	475								Negative		0	475	0	475	0	475	0	475
TCGA-AQ-A1H3-01	TCGA-AQ-A1H3	BRCA	49	FEMALE	WHITE	Stage IIIC		Infiltrating Ductal Carcinoma		2010	Pre (<6 months since LMP AND no prior bilateral ovariectomy AND not on estrogen replacement)	-18177	Alive	TUMOR FREE	989								Negative		0	989	0	989	0	989	0	989
TCGA-AQ-A54N-01	TCGA-AQ-A54N	BRCA	51	FEMALE	BLACK OR AFRICAN AMERICAN	Stage IIA		Infiltrating Ductal Carcinoma		2011	Post (prior bilateral ovariectomy OR >12 mo since LMP with no prior hysterectomy)	-18741	Alive	TUMOR FREE	78								Negative		0	78	0	78	0	78	0	78
TCGA-AQ-A54O-01	TCGA-AQ-A54O	BRCA	51	MALE	BLACK OR AFRICAN AMERICAN	Stage IIA		Infiltrating Ductal Carcinoma		2011		-18694	Alive	TUMOR FREE	1001								Negative		0	1001	0	1001	0	1001	0	1001
TCGA-AQ-A7U7-01	TCGA-AQ-A7U7	BRCA	55	FEMALE	WHITE	Stage IIIA		Infiltrating Lobular Carcinoma		2013	Post (prior bilateral ovariectomy OR >12 mo since LMP with no prior hysterectomy)	-20239	Dead	TUMOR FREE		584							Negative		1	584	0	584	0	584	0	584
TCGA-AR-A0TP-01	TCGA-AR-A0TP	BRCA	43	FEMALE	WHITE	Stage IIA		Infiltrating Ductal Carcinoma		2003	Pre (<6 months since LMP AND no prior bilateral ovariectomy AND not on estrogen replacement)	-15812	Alive	TUMOR FREE	4275								Negative		0	4275	0	4275	0	4275	0	4275
TCGA-AR-A0TQ-01	TCGA-AR-A0TQ	BRCA	27	FEMALE	WHITE	Stage IIIA		Infiltrating Ductal Carcinoma		2006	Pre (<6 months since LMP AND no prior bilateral ovariectomy AND not on estrogen replacement)	-9873	Alive	TUMOR FREE	2991								Negative		0	2991	0	2991	0	2991	0	2991
TCGA-AR-A0TR-01	TCGA-AR-A0TR	BRCA	68	FEMALE	WHITE	Stage IIB		Infiltrating Ductal Carcinoma		2006	Post (prior bilateral ovariectomy OR >12 mo since LMP with no prior hysterectomy)	-25190	Dead			160							Negative		1	160		160	0	160	0	160
TCGA-AR-A0TS-01	TCGA-AR-A0TS	BRCA	46	FEMALE	WHITE	Stage IIB		Infiltrating Ductal Carcinoma		2006	Pre (<6 months since LMP AND no prior bilateral ovariectomy AND not on estrogen replacement)	-17141	Alive	TUMOR FREE	2558								Negative		0	2558	0	2558	0	2558	0	2558
TCGA-AR-A0TT-01	TCGA-AR-A0TT	BRCA	53	FEMALE	BLACK OR AFRICAN AMERICAN	Stage IIIA		Infiltrating Ductal Carcinoma		2006	Pre (<6 months since LMP AND no prior bilateral ovariectomy AND not on estrogen replacement)	-19679	Alive	TUMOR FREE	3316								Negative		0	3316	0	3316	0	3316	0	3316
TCGA-AR-A0TU-01	TCGA-AR-A0TU	BRCA	35	FEMALE		Stage IIA		Infiltrating Ductal Carcinoma		2006	Pre (<6 months since LMP AND no prior bilateral ovariectomy AND not on estrogen replacement)	-13039	Alive	TUMOR FREE	709								Negative		0	709	0	709	0	709	0	709
TCGA-AR-A0TV-01	TCGA-AR-A0TV	BRCA	66	FEMALE		Stage IIA		Infiltrating Ductal Carcinoma		2005	Post (prior bilateral ovariectomy OR >12 mo since LMP with no prior hysterectomy)	-24279	Alive	TUMOR FREE	2288								Negative		0	2288	0	2288	0	2288	0	2288
TCGA-AR-A0TW-01	TCGA-AR-A0TW	BRCA	50	FEMALE	WHITE	Stage IIIA		Infiltrating Ductal Carcinoma		2005	Pre (<6 months since LMP AND no prior bilateral ovariectomy AND not on estrogen replacement)	-18263	Alive	TUMOR FREE	3009						739		Negative		0	3009	0	3009	1	739	1	739
TCGA-AR-A0TX-01	TCGA-AR-A0TX	BRCA	64	FEMALE		Stage IIA		Infiltrating Ductal Carcinoma		2005	Post (prior bilateral ovariectomy OR >12 mo since LMP with no prior hysterectomy)	-23653	Alive	TUMOR FREE	1972								Negative		0	1972	0	1972	0	1972	0	1972
TCGA-AR-A0TY-01	TCGA-AR-A0TY	BRCA	54	FEMALE	WHITE	Stage IIA		Infiltrating Ductal Carcinoma		2004	Post (prior bilateral ovariectomy OR >12 mo since LMP with no prior hysterectomy)	-19836	Dead	WITH TUMOR		1699		Distant Metastasis	Bone		544		Negative		1	1699	1	1699	1	544	1	544
TCGA-AR-A0TZ-01	TCGA-AR-A0TZ	BRCA	43	FEMALE	WHITE	[Discrepancy]		Infiltrating Ductal Carcinoma		2004	Pre (<6 months since LMP AND no prior bilateral ovariectomy AND not on estrogen replacement)	-15720	Dead			3262		Distant Metastasis	Bone		1313		Negative		1	3262		3262	1	1313	1	1313
TCGA-AR-A0U0-01	TCGA-AR-A0U0	BRCA	73	FEMALE	WHITE	Stage IIB		Infiltrating Ductal Carcinoma		2004	Post (prior bilateral ovariectomy OR >12 mo since LMP with no prior hysterectomy)	-26993	Alive	TUMOR FREE	1988								Negative		0	1988	0	1988	0	1988	0	1988
TCGA-AR-A0U1-01	TCGA-AR-A0U1	BRCA	36	FEMALE	WHITE	Stage IIB		Infiltrating Ductal Carcinoma		2004	Pre (<6 months since LMP AND no prior bilateral ovariectomy AND not on estrogen replacement)	-13467	Alive	TUMOR FREE	4052								Negative		0	4052	0	4052	0	4052	0	4052	Redacted
TCGA-AR-A0U2-01	TCGA-AR-A0U2	BRCA	47	FEMALE	WHITE	Stage IIIA		Infiltrating Ductal Carcinoma		2004	Pre (<6 months since LMP AND no prior bilateral ovariectomy AND not on estrogen replacement)	-17390	Dead	WITH TUMOR		2551		Distant Metastasis	Bone	Liver	1609		Negative		1	2551	1	2551	1	1609	1	1609
TCGA-AR-A0U3-01	TCGA-AR-A0U3	BRCA	59	FEMALE	WHITE	Stage IIB		Infiltrating Ductal Carcinoma		2004	Post (prior bilateral ovariectomy OR >12 mo since LMP with no prior hysterectomy)	-21755	Alive	TUMOR FREE	4080								Negative		0	4080	0	4080	0	4080	0	4080
TCGA-AR-A0U4-01	TCGA-AR-A0U4	BRCA	54	FEMALE	WHITE	Stage IIA		Infiltrating Ductal Carcinoma		2006	Pre (<6 months since LMP AND no prior bilateral ovariectomy AND not on estrogen replacement)	-19729	Alive	TUMOR FREE	3261								Negative		0	3261	0	3261	0	3261	0	3261
TCGA-AR-A1AH-01	TCGA-AR-A1AH	BRCA	51	FEMALE	WHITE	Stage IIB		Infiltrating Ductal Carcinoma		2004	Post (prior bilateral ovariectomy OR >12 mo since LMP with no prior hysterectomy)	-18991	Alive	TUMOR FREE	3807			New Primary Tumor	Other, specify	Renal	1136		Negative		0	3807	0	3807	0	3807	1	1136
TCGA-AR-A1AI-01	TCGA-AR-A1AI	BRCA	47	FEMALE	WHITE	Stage IIA		Medullary Carcinoma		2005	Post (prior bilateral ovariectomy OR >12 mo since LMP with no prior hysterectomy)	-17229	Alive	TUMOR FREE	3296			New Primary Tumor	Other, specify	Contralateral Breast	588		Negative		0	3296	0	3296	1	588	1	588
TCGA-AR-A1AJ-01	TCGA-AR-A1AJ	BRCA	83	FEMALE	WHITE	Stage I		Infiltrating Ductal Carcinoma		2005	Post (prior bilateral ovariectomy OR >12 mo since LMP with no prior hysterectomy)	-30489	Alive	TUMOR FREE	3072								Negative		0	3072	0	3072	0	3072	0	3072
TCGA-AR-A1AK-01	TCGA-AR-A1AK	BRCA	70	FEMALE	WHITE	Stage I		Infiltrating Lobular Carcinoma		2006	Post (prior bilateral ovariectomy OR >12 mo since LMP with no prior hysterectomy)	-25825	Alive	TUMOR FREE	3159								Negative		0	3159	0	3159	0	3159	0	3159
TCGA-AR-A1AL-01	TCGA-AR-A1AL	BRCA	60	FEMALE	WHITE	Stage IIIA		Infiltrating Lobular Carcinoma		2006	Post (prior bilateral ovariectomy OR >12 mo since LMP with no prior hysterectomy)	-22023	Alive	TUMOR FREE	2971								Negative		0	2971	0	2971	0	2971	0	2971
TCGA-AR-A1AM-01	TCGA-AR-A1AM	BRCA	52	FEMALE	WHITE	Stage IIIA		Infiltrating Lobular Carcinoma		2006	Post (prior bilateral ovariectomy OR >12 mo since LMP with no prior hysterectomy)	-19123	Alive	TUMOR FREE	2991								Negative		0	2991	0	2991	0	2991	0	2991
TCGA-AR-A1AN-01	TCGA-AR-A1AN	BRCA	46	FEMALE	WHITE	Stage IIA		Infiltrating Ductal Carcinoma		2006	Pre (<6 months since LMP AND no prior bilateral ovariectomy AND not on estrogen replacement)	-16974	Alive	TUMOR FREE	2920								Negative		0	2920	0	2920	0	2920	0	2920
TCGA-AR-A1AO-01	TCGA-AR-A1AO	BRCA	47	FEMALE	WHITE	Stage IIA		Infiltrating Ductal Carcinoma		2006	Pre (<6 months since LMP AND no prior bilateral ovariectomy AND not on estrogen replacement)	-17332	Alive	TUMOR FREE	2618								Negative		0	2618	0	2618	0	2618	0	2618
TCGA-AR-A1AP-01	TCGA-AR-A1AP	BRCA	80	FEMALE	WHITE	Stage I		Infiltrating Ductal Carcinoma		2007	Post (prior bilateral ovariectomy OR >12 mo since LMP with no prior hysterectomy)	-29406	Alive	TUMOR FREE	2856								Negative		0	2856	0	2856	0	2856	0	2856
TCGA-AR-A1AQ-01	TCGA-AR-A1AQ	BRCA	49	FEMALE	WHITE	Stage IIA		Infiltrating Ductal Carcinoma		2007	Post (prior bilateral ovariectomy OR >12 mo since LMP with no prior hysterectomy)	-18109	Alive	TUMOR FREE	3021								Negative		0	3021	0	3021	0	3021	0	3021
TCGA-AR-A1AR-01	TCGA-AR-A1AR	BRCA	50	FEMALE	WHITE	Stage IIIA		Infiltrating Ductal Carcinoma		2007	Post (prior bilateral ovariectomy OR >12 mo since LMP with no prior hysterectomy)	-18482	Dead	WITH TUMOR		524		New Primary Tumor	Other, specify	Breast	268		Negative		1	524	1	524	1	268	1	268
TCGA-AR-A1AS-01	TCGA-AR-A1AS	BRCA	54	FEMALE	ASIAN	Stage IIB		Infiltrating Ductal Carcinoma		2007	Post (prior bilateral ovariectomy OR >12 mo since LMP with no prior hysterectomy)	-20028	Alive	TUMOR FREE	1150								Negative		0	1150	0	1150	0	1150	0	1150
TCGA-AR-A1AT-01	TCGA-AR-A1AT	BRCA	62	FEMALE	WHITE	Stage IIA		Infiltrating Lobular Carcinoma		2007	Post (prior bilateral ovariectomy OR >12 mo since LMP with no prior hysterectomy)	-22942	Dead			1272							Negative		1	1272		1272	0	1272	0	1272
TCGA-AR-A1AU-01	TCGA-AR-A1AU	BRCA	39	FEMALE	WHITE	Stage IIIA		Infiltrating Ductal Carcinoma		2007	Pre (<6 months since LMP AND no prior bilateral ovariectomy AND not on estrogen replacement)	-14564	Alive	TUMOR FREE	2868								Negative		0	2868	0	2868	0	2868	0	2868
TCGA-AR-A1AV-01	TCGA-AR-A1AV	BRCA	68	MALE	WHITE	Stage IIB		Infiltrating Ductal Carcinoma		2007		-24875	Alive	TUMOR FREE	1864								Negative		0	1864	0	1864	0	1864	0	1864
TCGA-AR-A1AW-01	TCGA-AR-A1AW	BRCA	65	FEMALE	WHITE	Stage IIA		Infiltrating Ductal Carcinoma		2007	Post (prior bilateral ovariectomy OR >12 mo since LMP with no prior hysterectomy)	-23855	Alive	TUMOR FREE	2632								Negative		0	2632	0	2632	0	2632	0	2632
TCGA-AR-A1AX-01	TCGA-AR-A1AX	BRCA	64	FEMALE	WHITE	Stage I		Infiltrating Ductal Carcinoma		2007	Post (prior bilateral ovariectomy OR >12 mo since LMP with no prior hysterectomy)	-23507	Alive	TUMOR FREE	2629								Negative		0	2629	0	2629	0	2629	0	2629
TCGA-AR-A1AY-01	TCGA-AR-A1AY	BRCA	65	FEMALE	WHITE	Stage I		Infiltrating Ductal Carcinoma		2008	Post (prior bilateral ovariectomy OR >12 mo since LMP with no prior hysterectomy)	-23927	Alive	TUMOR FREE	1026								Negative		0	1026	0	1026	0	1026	0	1026
TCGA-AR-A24H-01	TCGA-AR-A24H	BRCA	65	FEMALE	WHITE	Stage IIA		Infiltrating Lobular Carcinoma		2001	Post (prior bilateral ovariectomy OR >12 mo since LMP with no prior hysterectomy)	-24046	Alive	TUMOR FREE	4894								Negative		0	4894	0	4894	0	4894	0	4894
TCGA-AR-A24K-01	TCGA-AR-A24K	BRCA	46	FEMALE	WHITE	Stage IIA		Infiltrating Ductal Carcinoma		2004	Pre (<6 months since LMP AND no prior bilateral ovariectomy AND not on estrogen replacement)	-16961	Alive	TUMOR FREE	1548								Negative		0	1548	0	1548	0	1548	0	1548
TCGA-AR-A24L-01	TCGA-AR-A24L	BRCA	26	FEMALE	WHITE	Stage IIB		Infiltrating Ductal Carcinoma		2005	Pre (<6 months since LMP AND no prior bilateral ovariectomy AND not on estrogen replacement)	-9706	Dead	WITH TUMOR		2866		Locoregional Disease			1414		Negative		1	2866	1	2866	1	1414	1	1414
TCGA-AR-A24M-01	TCGA-AR-A24M	BRCA	38	FEMALE	WHITE	Stage IIIA		Mixed Histology (please specify)		2005	Pre (<6 months since LMP AND no prior bilateral ovariectomy AND not on estrogen replacement)	-14119	Alive	TUMOR FREE	3660								Negative		0	3660	0	3660	0	3660	0	3660
TCGA-AR-A24N-01	TCGA-AR-A24N	BRCA	54	FEMALE	WHITE	Stage I		Infiltrating Ductal Carcinoma		2005	Peri (6-12 months since last menstrual period)	-19989	Alive	TUMOR FREE	3035								Negative		0	3035	0	3035	0	3035	0	3035
TCGA-AR-A24O-01	TCGA-AR-A24O	BRCA	43	FEMALE	WHITE	Stage IIIA		Mixed Histology (please specify)		2005	Pre (<6 months since LMP AND no prior bilateral ovariectomy AND not on estrogen replacement)	-15977	Alive	WITH TUMOR	3607						2561		Negative		0	3607	0	3607	1	2561	1	2561
TCGA-AR-A24P-01	TCGA-AR-A24P	BRCA	47	FEMALE	WHITE	Stage I		Infiltrating Ductal Carcinoma		2005	Post (prior bilateral ovariectomy OR >12 mo since LMP with no prior hysterectomy)	-17490	Alive		84								Negative		0	84	0	84	0	84	0	84
TCGA-AR-A24Q-01	TCGA-AR-A24Q	BRCA	49	FEMALE	WHITE	Stage IIB		Infiltrating Ductal Carcinoma		2006	Post (prior bilateral ovariectomy OR >12 mo since LMP with no prior hysterectomy)	-18084	Alive	TUMOR FREE	3172								Negative		0	3172	0	3172	0	3172	0	3172
TCGA-AR-A24R-01	TCGA-AR-A24R	BRCA	45	FEMALE	WHITE	Stage IIIA		Infiltrating Ductal Carcinoma		2006	Pre (<6 months since LMP AND no prior bilateral ovariectomy AND not on estrogen replacement)	-16642	Alive	TUMOR FREE	3430								Negative		0	3430	0	3430	0	3430	0	3430
TCGA-AR-A24S-01	TCGA-AR-A24S	BRCA	61	FEMALE	WHITE	Stage I		Infiltrating Ductal Carcinoma		2006	Post (prior bilateral ovariectomy OR >12 mo since LMP with no prior hysterectomy)	-22587	Alive		2976								Negative		0	2976	0	2976	0	2976	0	2976
TCGA-AR-A24T-01	TCGA-AR-A24T	BRCA	46	FEMALE	WHITE	Stage IIIC		Infiltrating Lobular Carcinoma		2006	Pre (<6 months since LMP AND no prior bilateral ovariectomy AND not on estrogen replacement)	-17135	Alive	TUMOR FREE	3202								Negative		0	3202	0	3202	0	3202	0	3202
TCGA-AR-A24U-01	TCGA-AR-A24U	BRCA	47	FEMALE	WHITE	Stage IIA		Infiltrating Ductal Carcinoma		2006	Pre (<6 months since LMP AND no prior bilateral ovariectomy AND not on estrogen replacement)	-17523	Alive	TUMOR FREE	3128								Negative		0	3128	0	3128	0	3128	0	3128
TCGA-AR-A24V-01	TCGA-AR-A24V	BRCA	52	FEMALE	WHITE	Stage IIB		Infiltrating Ductal Carcinoma		2006	Peri (6-12 months since last menstrual period)	-19027	Alive	TUMOR FREE	3203								Negative		0	3203	0	3203	0	3203	0	3203
TCGA-AR-A24W-01	TCGA-AR-A24W	BRCA	55	FEMALE	WHITE	Stage IIB		Infiltrating Ductal Carcinoma		2006	Post (prior bilateral ovariectomy OR >12 mo since LMP with no prior hysterectomy)	-20123	Alive	TUMOR FREE	1550								Negative		0	1550	0	1550	0	1550	0	1550
TCGA-AR-A24X-01	TCGA-AR-A24X	BRCA	52	FEMALE	WHITE	Stage IIA		Mixed Histology (please specify)		2006	Pre (<6 months since LMP AND no prior bilateral ovariectomy AND not on estrogen replacement)	-19030	Alive	TUMOR FREE	3004								Negative		0	3004	0	3004	0	3004	0	3004
TCGA-AR-A24Z-01	TCGA-AR-A24Z	BRCA	57	FEMALE	WHITE	Stage IIA		Infiltrating Ductal Carcinoma		2006	Post (prior bilateral ovariectomy OR >12 mo since LMP with no prior hysterectomy)	-20900	Alive	TUMOR FREE	3001								Negative		0	3001	0	3001	0	3001	0	3001
TCGA-AR-A250-01	TCGA-AR-A250	BRCA	58	FEMALE	WHITE	Stage IIA		Infiltrating Ductal Carcinoma		2006	Post (prior bilateral ovariectomy OR >12 mo since LMP with no prior hysterectomy)	-21309	Alive	TUMOR FREE	2707								Negative		0	2707	0	2707	0	2707	0	2707
TCGA-AR-A251-01	TCGA-AR-A251	BRCA	51	FEMALE	WHITE	Stage IIIA		Infiltrating Ductal Carcinoma		2006	Pre (<6 months since LMP AND no prior bilateral ovariectomy AND not on estrogen replacement)	-18771	Alive	TUMOR FREE	3030								Negative		0	3030	0	3030	0	3030	0	3030
TCGA-AR-A252-01	TCGA-AR-A252	BRCA	50	FEMALE	WHITE	Stage I		Infiltrating Ductal Carcinoma		2007	Pre (<6 months since LMP AND no prior bilateral ovariectomy AND not on estrogen replacement)	-18611	Alive	TUMOR FREE	2838								Negative		0	2838	0	2838	0	2838	0	2838
TCGA-AR-A254-01	TCGA-AR-A254	BRCA	50	FEMALE	WHITE	Stage IIIA		Infiltrating Ductal Carcinoma		2007	Pre (<6 months since LMP AND no prior bilateral ovariectomy AND not on estrogen replacement)	-18270	Alive	TUMOR FREE	2605								Negative		0	2605	0	2605	0	2605	0	2605
TCGA-AR-A255-01	TCGA-AR-A255	BRCA	62	FEMALE	WHITE	Stage I		Infiltrating Ductal Carcinoma		2007	Post (prior bilateral ovariectomy OR >12 mo since LMP with no prior hysterectomy)	-22809	Alive	TUMOR FREE	2161								Negative		0	2161	0	2161	0	2161	0	2161
TCGA-AR-A256-01	TCGA-AR-A256	BRCA	45	FEMALE	WHITE	Stage IIA		Infiltrating Ductal Carcinoma		2001	Pre (<6 months since LMP AND no prior bilateral ovariectomy AND not on estrogen replacement)	-16642	Dead			2854		Locoregional Disease			1640		Negative		1	2854		2854	1	1640	1	1640
TCGA-AR-A2LE-01	TCGA-AR-A2LE	BRCA	69	FEMALE	WHITE	Stage I		Infiltrating Lobular Carcinoma		2001	Post (prior bilateral ovariectomy OR >12 mo since LMP with no prior hysterectomy)	-25499	Alive	TUMOR FREE	5062			New Primary Tumor	Other, specify	Endometrium	4203		Negative		0	5062	0	5062	0	5062	1	4203
TCGA-AR-A2LH-01	TCGA-AR-A2LH	BRCA	55	FEMALE	WHITE	Stage III		Infiltrating Lobular Carcinoma		2007	Post (prior bilateral ovariectomy OR >12 mo since LMP with no prior hysterectomy)	-20288	Dead			616		Distant Metastasis	Bone		434		Negative		1	616		616	1	434	1	434
TCGA-AR-A2LJ-01	TCGA-AR-A2LJ	BRCA	40	FEMALE	WHITE	Stage IIIA		Infiltrating Lobular Carcinoma		2007	Pre (<6 months since LMP AND no prior bilateral ovariectomy AND not on estrogen replacement)	-14723	Alive	TUMOR FREE	2632								Negative		0	2632	0	2632	0	2632	0	2632
TCGA-AR-A2LK-01	TCGA-AR-A2LK	BRCA	62	FEMALE	WHITE	Stage III		Infiltrating Lobular Carcinoma		2007	Post (prior bilateral ovariectomy OR >12 mo since LMP with no prior hysterectomy)	-22800	Dead			1649		Distant Metastasis	Bone		1304		Negative		1	1649		1649	1	1304	1	1304
TCGA-AR-A2LL-01	TCGA-AR-A2LL	BRCA	70	FEMALE	WHITE	Stage IIB		Infiltrating Lobular Carcinoma		2007	Post (prior bilateral ovariectomy OR >12 mo since LMP with no prior hysterectomy)	-25747	Alive	TUMOR FREE	2012								Negative		0	2012	0	2012	0	2012	0	2012
TCGA-AR-A2LM-01	TCGA-AR-A2LM	BRCA	49	FEMALE	WHITE	Stage II		Infiltrating Lobular Carcinoma		2007	Pre (<6 months since LMP AND no prior bilateral ovariectomy AND not on estrogen replacement)	-18053	Alive	TUMOR FREE	1935								Negative		0	1935	0	1935	0	1935	0	1935
TCGA-AR-A2LN-01	TCGA-AR-A2LN	BRCA	65	FEMALE	WHITE	Stage IIA		Infiltrating Lobular Carcinoma		2010	Post (prior bilateral ovariectomy OR >12 mo since LMP with no prior hysterectomy)	-23992	Alive	TUMOR FREE	1161								Negative		0	1161	0	1161	0	1161	0	1161
TCGA-AR-A2LO-01	TCGA-AR-A2LO	BRCA	46	FEMALE	WHITE	Stage IIB		Infiltrating Lobular Carcinoma		2010	Pre (<6 months since LMP AND no prior bilateral ovariectomy AND not on estrogen replacement)	-17080	Alive	TUMOR FREE	1198								Negative		0	1198	0	1198	0	1198	0	1198
TCGA-AR-A2LQ-01	TCGA-AR-A2LQ	BRCA	59	FEMALE	WHITE	Stage IIB		Infiltrating Lobular Carcinoma		2010	Post (prior bilateral ovariectomy OR >12 mo since LMP with no prior hysterectomy)	-21865	Alive	TUMOR FREE	1233								Negative		0	1233	0	1233	0	1233	0	1233
TCGA-AR-A2LR-01	TCGA-AR-A2LR	BRCA	49	FEMALE	WHITE	Stage I		Metaplastic Carcinoma		2010	Post (prior bilateral ovariectomy OR >12 mo since LMP with no prior hysterectomy)	-18214	Alive	TUMOR FREE	1742								Negative		0	1742	0	1742	0	1742	0	1742
TCGA-AR-A5QM-01	TCGA-AR-A5QM	BRCA	62	FEMALE	WHITE	Stage IIA		Infiltrating Lobular Carcinoma		2008	Post (prior bilateral ovariectomy OR >12 mo since LMP with no prior hysterectomy)	-22780	Alive	TUMOR FREE	2231			New Primary Tumor	Other, specify	Malignant melanoma	968				0	2231	0	2231			1	968
TCGA-AR-A5QN-01	TCGA-AR-A5QN	BRCA	68	FEMALE	WHITE	Stage IIIC		Infiltrating Lobular Carcinoma		2012	Post (prior bilateral ovariectomy OR >12 mo since LMP with no prior hysterectomy)	-25089	Alive	TUMOR FREE	1013										0	1013	0	1013			0	1013
TCGA-AR-A5QP-01	TCGA-AR-A5QP	BRCA	54	FEMALE	WHITE	Stage IIB		Infiltrating Lobular Carcinoma		2011	Post (prior bilateral ovariectomy OR >12 mo since LMP with no prior hysterectomy)	-19805	Alive	TUMOR FREE	1185										0	1185	0	1185			0	1185
TCGA-AR-A5QQ-01	TCGA-AR-A5QQ	BRCA	68	FEMALE	WHITE	Stage IIIA		Other, specify		2011	Post (prior bilateral ovariectomy OR >12 mo since LMP with no prior hysterectomy)	-24841	Dead	WITH TUMOR		322		Distant Metastasis	Lung	Liver, bone, chest wall, adrenal glands	301				1	322	1	322			1	301
TCGA-B6-A0I1-01	TCGA-B6-A0I1	BRCA	73	FEMALE	BLACK OR AFRICAN AMERICAN	Stage IIA		Infiltrating Ductal Carcinoma		1998	Post (prior bilateral ovariectomy OR >12 mo since LMP with no prior hysterectomy)	-26902	Dead	TUMOR FREE		2361		Distant Metastasis	Lung		1120		Negative		1	2361	0	2361	1	1120	1	1120
TCGA-B6-A0I2-01	TCGA-B6-A0I2	BRCA	45	FEMALE	WHITE	Stage IA		Infiltrating Ductal Carcinoma		1995	Indeterminate (neither Pre or Postmenopausal)	-16702	Alive	TUMOR FREE	4361										0	4361	0	4361			0	4361
TCGA-B6-A0I5-01	TCGA-B6-A0I5	BRCA	49	FEMALE	WHITE	Stage IIB		Infiltrating Ductal Carcinoma		1988	Indeterminate (neither Pre or Postmenopausal)	-18038	Alive	TUMOR FREE	8556								Negative		0	8556	0	8556	0	8556	0	8556
TCGA-B6-A0I6-01	TCGA-B6-A0I6	BRCA	49	FEMALE	BLACK OR AFRICAN AMERICAN	Stage IIA		Infiltrating Ductal Carcinoma		1990	Indeterminate (neither Pre or Postmenopausal)	-18014	Dead	WITH TUMOR		991		Distant Metastasis	Other, specify	Skin and bone	859		Negative		1	991	1	991	1	859	1	859
TCGA-B6-A0I8-01	TCGA-B6-A0I8	BRCA	46	FEMALE	WHITE	Stage X		Infiltrating Ductal Carcinoma		1992	Indeterminate (neither Pre or Postmenopausal)	-17073	Dead	WITH TUMOR		749		Locoregional Disease	Other, specify	Pectoral muscle	746				1	749	1	749			1	746
TCGA-B6-A0I9-01	TCGA-B6-A0I9	BRCA	62	FEMALE	WHITE	Stage IV		Infiltrating Ductal Carcinoma		1992	Indeterminate (neither Pre or Postmenopausal)	-22798	Dead	WITH TUMOR		362									1	362	1	362			1	362
TCGA-B6-A0IA-01	TCGA-B6-A0IA	BRCA	51	FEMALE	WHITE	Stage IIA		Other, specify		1992	Indeterminate (neither Pre or Postmenopausal)	-18748	Alive	TUMOR FREE	8391								Negative		0	8391	0	8391	0	8391	0	8391
TCGA-B6-A0IB-01	TCGA-B6-A0IB	BRCA	64	FEMALE	WHITE	Stage IV		Infiltrating Ductal Carcinoma		1992	Indeterminate (neither Pre or Postmenopausal)	-23646	Dead	WITH TUMOR		3941		Distant Metastasis	Other, specify	lung, bone, liver	2717		Negative		1	3941	1	3941			1	2717
TCGA-B6-A0IC-01	TCGA-B6-A0IC	BRCA	90	FEMALE	WHITE	Stage X		Other, specify		1992	Post (prior bilateral ovariectomy OR >12 mo since LMP with no prior hysterectomy)	-32872	Dead	TUMOR FREE		1542							Negative		1	1542	0	1542	0	1542	0	1542
TCGA-B6-A0IE-01	TCGA-B6-A0IE	BRCA	38	FEMALE	BLACK OR AFRICAN AMERICAN	Stage IIIA		Mixed Histology (please specify)		1995	Pre (<6 months since LMP AND no prior bilateral ovariectomy AND not on estrogen replacement)	-13982	Dead	WITH TUMOR		1993		Distant Metastasis	Bone		834		Negative		1	1993	1	1993	1	834	1	834
TCGA-B6-A0IG-01	TCGA-B6-A0IG	BRCA	50	FEMALE	WHITE	Stage IIB		Infiltrating Ductal Carcinoma		1994	Indeterminate (neither Pre or Postmenopausal)	-18433	Dead	WITH TUMOR		4456							Negative		1	4456	1	4456			1	4456
TCGA-B6-A0IH-01	TCGA-B6-A0IH	BRCA	81	FEMALE	WHITE	Stage IIIA		Infiltrating Lobular Carcinoma		1995	Post (prior bilateral ovariectomy OR >12 mo since LMP with no prior hysterectomy)	-29907	Dead			3418							Negative		1	3418		3418	0	3418	0	3418
TCGA-B6-A0IJ-01	TCGA-B6-A0IJ	BRCA	42	FEMALE	BLACK OR AFRICAN AMERICAN	Stage IIB		Infiltrating Ductal Carcinoma		1995	Indeterminate (neither Pre or Postmenopausal)	-15625	Alive	TUMOR FREE	7106								Negative		0	7106	0	7106	0	7106	0	7106
TCGA-B6-A0IK-01	TCGA-B6-A0IK	BRCA	63	FEMALE	WHITE	Stage IIIB		Infiltrating Ductal Carcinoma		1994	Indeterminate (neither Pre or Postmenopausal)	-23150	Dead	WITH TUMOR		571		Distant Metastasis	Brain		489		Negative		1	571	1	571	1	489	1	489
TCGA-B6-A0IM-01	TCGA-B6-A0IM	BRCA	75	FEMALE	BLACK OR AFRICAN AMERICAN	Stage IIB		Other, specify		1997	Post (prior bilateral ovariectomy OR >12 mo since LMP with no prior hysterectomy)	-27557	Dead	TUMOR FREE		3873							Negative		1	3873	0	3873	0	3873	0	3873
TCGA-B6-A0IN-01	TCGA-B6-A0IN	BRCA	45	FEMALE	WHITE	Stage X		Other, specify		1996	Indeterminate (neither Pre or Postmenopausal)	-16705	Dead	WITH TUMOR		2573		Distant Metastasis	Other, specify	bone, brain	1412		Negative		1	2573	1	2573	1	1412	1	1412
TCGA-B6-A0IO-01	TCGA-B6-A0IO	BRCA	66	FEMALE	WHITE	Stage IIA		Infiltrating Ductal Carcinoma		2001	Indeterminate (neither Pre or Postmenopausal)	-24322	Alive	TUMOR FREE	5042								Negative		0	5042	0	5042	0	5042	0	5042
TCGA-B6-A0IP-01	TCGA-B6-A0IP	BRCA	74	FEMALE	WHITE	Stage IA		Infiltrating Lobular Carcinoma		1997	Post (prior bilateral ovariectomy OR >12 mo since LMP with no prior hysterectomy)	-27047	Dead	TUMOR FREE		3926							Negative		1	3926	0	3926	0	3926	0	3926
TCGA-B6-A0IQ-01	TCGA-B6-A0IQ	BRCA	40	FEMALE	WHITE	Stage IIIA		Infiltrating Ductal Carcinoma		1996	Indeterminate (neither Pre or Postmenopausal)	-14669	Alive	TUMOR FREE	4285								Negative		0	4285	0	4285	0	4285	0	4285
TCGA-B6-A0RE-01	TCGA-B6-A0RE	BRCA	61	FEMALE	BLACK OR AFRICAN AMERICAN	Stage X		Infiltrating Ductal Carcinoma		1989	Indeterminate (neither Pre or Postmenopausal)	-22449	Alive	TUMOR FREE	7777								Negative		0	7777	0	7777	0	7777	0	7777
TCGA-B6-A0RG-01	TCGA-B6-A0RG	BRCA	26	FEMALE	WHITE	Stage IIB		Infiltrating Ductal Carcinoma		1991	Indeterminate (neither Pre or Postmenopausal)	-9840	Alive	TUMOR FREE	2082								Negative		0	2082	0	2082	0	2082	0	2082
TCGA-B6-A0RH-01	TCGA-B6-A0RH	BRCA	51	FEMALE	BLACK OR AFRICAN AMERICAN	Stage IIA		Infiltrating Ductal Carcinoma		1991	Indeterminate (neither Pre or Postmenopausal)	-18759	Dead	TUMOR FREE		6456		Locoregional Disease	Other, specify	Chest Wall	2165		Negative		1	6456	0	6456	1	2165	1	2165
TCGA-B6-A0RI-01	TCGA-B6-A0RI	BRCA	44	FEMALE	WHITE	Stage IIIB		Infiltrating Ductal Carcinoma		1992	Indeterminate (neither Pre or Postmenopausal)	-16138	Alive	WITH TUMOR	7126			Locoregional Disease	Other, specify	Chest Wall	1100		Negative		0	7126	0	7126	1	1100	1	1100
TCGA-B6-A0RL-01	TCGA-B6-A0RL	BRCA	60	FEMALE	BLACK OR AFRICAN AMERICAN	Stage IIA		Infiltrating Ductal Carcinoma		1993		-22238	Dead	TUMOR FREE		2469							Negative		1	2469	0	2469	0	2469	0	2469
TCGA-B6-A0RM-01	TCGA-B6-A0RM	BRCA	57	FEMALE	BLACK OR AFRICAN AMERICAN	Stage X		Infiltrating Ductal Carcinoma		1993	Indeterminate (neither Pre or Postmenopausal)	-21047	Dead	TUMOR FREE		2373									1	2373	0	2373			0	2373
TCGA-B6-A0RN-01	TCGA-B6-A0RN	BRCA	60	FEMALE	WHITE	Stage IA		Infiltrating Ductal Carcinoma		1993	Post (prior bilateral ovariectomy OR >12 mo since LMP with no prior hysterectomy)	-22077	Alive	TUMOR FREE	8008								Negative		0	8008	0	8008	0	8008	0	8008
TCGA-B6-A0RO-01	TCGA-B6-A0RO	BRCA	71	FEMALE	WHITE	Stage IIIB		Infiltrating Ductal Carcinoma		1993	Post (prior bilateral ovariectomy OR >12 mo since LMP with no prior hysterectomy)	-26269	Alive	TUMOR FREE	4929								Negative		0	4929	0	4929	0	4929	0	4929
TCGA-B6-A0RP-01	TCGA-B6-A0RP	BRCA	73	FEMALE	WHITE	[Discrepancy]		Mixed Histology (please specify)		1994	Post (prior bilateral ovariectomy OR >12 mo since LMP with no prior hysterectomy)	-26941	Dead	WITH TUMOR		3126		Distant Metastasis	Bone		2787		Negative		1	3126	1	3126	1	2787	1	2787
TCGA-B6-A0RQ-01	TCGA-B6-A0RQ	BRCA	68	FEMALE	WHITE	Stage IIB		Infiltrating Lobular Carcinoma		1994	Post (prior bilateral ovariectomy OR >12 mo since LMP with no prior hysterectomy)	-25010	Dead	TUMOR FREE		4267							Negative		1	4267	0	4267	0	4267	0	4267
TCGA-B6-A0RS-01	TCGA-B6-A0RS	BRCA	38	FEMALE	WHITE	Stage IIA		Infiltrating Ductal Carcinoma		1988	Indeterminate (neither Pre or Postmenopausal)	-14134	Dead	WITH TUMOR		3063		New Primary Tumor	Other, specify	Breast	2041		Negative		1	3063	1	3063	1	2041	1	2041
TCGA-B6-A0RT-01	TCGA-B6-A0RT	BRCA	39	FEMALE	WHITE	Stage IIIA		Infiltrating Ductal Carcinoma		1996	Indeterminate (neither Pre or Postmenopausal)	-14374	Alive	TUMOR FREE	2721								Close		0	2721	0	2721			0	2721
TCGA-B6-A0RU-01	TCGA-B6-A0RU	BRCA	40	FEMALE	WHITE	Stage IA		Other, specify		1990	Indeterminate (neither Pre or Postmenopausal)	-14920	Alive	TUMOR FREE	8605			New Primary Tumor	Other, specify	Right Breast	3076		Negative		0	8605	0	8605	1	3076	1	3076
TCGA-B6-A0RV-01	TCGA-B6-A0RV	BRCA	42	FEMALE	WHITE	Stage IIIA		Mixed Histology (please specify)		1996	Indeterminate (neither Pre or Postmenopausal)	-15507	Alive	TUMOR FREE	5156								Negative		0	5156	0	5156	0	5156	0	5156
TCGA-B6-A0WS-01	TCGA-B6-A0WS	BRCA	58	FEMALE	BLACK OR AFRICAN AMERICAN	Stage X		Infiltrating Ductal Carcinoma		1996	Indeterminate (neither Pre or Postmenopausal)	-21230	Dead	TUMOR FREE		2965							Positive		1	2965	0	2965			0	2965
TCGA-B6-A0WT-01	TCGA-B6-A0WT	BRCA	61	FEMALE	WHITE	Stage IIB		Infiltrating Ductal Carcinoma		1995	Post (prior bilateral ovariectomy OR >12 mo since LMP with no prior hysterectomy)	-22362	Alive	TUMOR FREE	5739			New Primary Tumor	Other, specify	right breast cancer contralateral	3862		Negative		0	5739	0	5739	1	3862	1	3862
TCGA-B6-A0WV-01	TCGA-B6-A0WV	BRCA	67	FEMALE	WHITE	Stage IIB		Infiltrating Ductal Carcinoma		1995	Post (prior bilateral ovariectomy OR >12 mo since LMP with no prior hysterectomy)	-24803	Dead	TUMOR FREE		2417							Negative		1	2417	0	2417	0	2417	0	2417
TCGA-B6-A0WW-01	TCGA-B6-A0WW	BRCA	58	FEMALE	BLACK OR AFRICAN AMERICAN	Stage X		Infiltrating Ductal Carcinoma		1997	Indeterminate (neither Pre or Postmenopausal)	-21479	Dead	WITH TUMOR		558		Distant Metastasis	Liver		447		Negative		1	558	1	558	1	447	1	447
TCGA-B6-A0WX-01	TCGA-B6-A0WX	BRCA	40	FEMALE	BLACK OR AFRICAN AMERICAN	Stage IIIA		Other, specify		1998	Pre (<6 months since LMP AND no prior bilateral ovariectomy AND not on estrogen replacement)	-14784	Dead	WITH TUMOR		639		Distant Metastasis	Bone		563		Negative		1	639	1	639	1	563	1	563
TCGA-B6-A0WY-01	TCGA-B6-A0WY	BRCA	40	FEMALE	WHITE	Stage IIIA		Infiltrating Ductal Carcinoma		1996	Pre (<6 months since LMP AND no prior bilateral ovariectomy AND not on estrogen replacement)	-14778	Dead	WITH TUMOR		3461		Distant Metastasis	Bone		2011		Negative		1	3461	1	3461	1	2011	1	2011
TCGA-B6-A0WZ-01	TCGA-B6-A0WZ	BRCA	50	FEMALE	BLACK OR AFRICAN AMERICAN	Stage II		Infiltrating Ductal Carcinoma		1996	Indeterminate (neither Pre or Postmenopausal)	-18584	Alive	TUMOR FREE	6292			New Primary Tumor	Bone		5117		Negative		0	6292	0	6292	0	6292	1	5117
TCGA-B6-A0X0-01	TCGA-B6-A0X0	BRCA	54	FEMALE	WHITE	Stage I		Other, specify		1996	Indeterminate (neither Pre or Postmenopausal)	-19802	Dead			3945							Negative		1	3945		3945	0	3945	0	3945
TCGA-B6-A0X1-01	TCGA-B6-A0X1	BRCA	48	FEMALE	WHITE	[Discrepancy]		Infiltrating Ductal Carcinoma		1994	Indeterminate (neither Pre or Postmenopausal)	-17624	Dead	TUMOR FREE		7455		Distant Metastasis	Brain		490		Negative		1	7455	0	7455	1	490	1	490
TCGA-B6-A0X4-01	TCGA-B6-A0X4	BRCA	62	FEMALE	WHITE	Stage IIB		Infiltrating Ductal Carcinoma		1996	Post (prior bilateral ovariectomy OR >12 mo since LMP with no prior hysterectomy)	-22688	Dead	WITH TUMOR		860		Distant Metastasis	Bone		716		Negative		1	860	1	860	1	716	1	716
TCGA-B6-A0X5-01	TCGA-B6-A0X5	BRCA	61	FEMALE	BLACK OR AFRICAN AMERICAN	Stage IIB		Infiltrating Ductal Carcinoma		1995	Post (prior bilateral ovariectomy OR >12 mo since LMP with no prior hysterectomy)	-22380	Dead	WITH TUMOR		2097		Distant Metastasis	Other, specify	Liver and Pleura and Bone	1343		Negative		1	2097	1	2097	1	1343	1	1343
TCGA-B6-A0X7-01	TCGA-B6-A0X7	BRCA	62	FEMALE	WHITE	Stage X		Mixed Histology (please specify)		1994	Post (prior bilateral ovariectomy OR >12 mo since LMP with no prior hysterectomy)	-22723	Dead	TUMOR FREE		1781		New Primary Tumor	Other, specify	colon	1104				1	1781	0	1781			1	1104
TCGA-B6-A1KC-01	TCGA-B6-A1KC	BRCA	67	FEMALE	WHITE	Stage IIB		Infiltrating Ductal Carcinoma		2003	Post (prior bilateral ovariectomy OR >12 mo since LMP with no prior hysterectomy)	-24791	Alive	TUMOR FREE	1326								Negative		0	1326	0	1326	0	1326	0	1326
TCGA-B6-A1KF-01	TCGA-B6-A1KF	BRCA	68	FEMALE	WHITE	Stage IIB		Infiltrating Ductal Carcinoma		1998	Post (prior bilateral ovariectomy OR >12 mo since LMP with no prior hysterectomy)	-24891	Alive	TUMOR FREE	3088								Negative		0	3088	0	3088	0	3088	0	3088
TCGA-B6-A1KI-01	TCGA-B6-A1KI	BRCA	63	FEMALE	WHITE	Stage I		Infiltrating Ductal Carcinoma		2003	Post (prior bilateral ovariectomy OR >12 mo since LMP with no prior hysterectomy)	-23031	Alive	TUMOR FREE	2236								Negative		0	2236	0	2236	0	2236	0	2236
TCGA-B6-A1KN-01	TCGA-B6-A1KN	BRCA	57	FEMALE	WHITE	Stage IIIB		Infiltrating Ductal Carcinoma		1998	Post (prior bilateral ovariectomy OR >12 mo since LMP with no prior hysterectomy)	-21183	Alive	TUMOR FREE	4233								Negative		0	4233	0	4233	0	4233	0	4233
TCGA-B6-A2IU-01	TCGA-B6-A2IU	BRCA	62	FEMALE	WHITE	Stage IIA		Infiltrating Lobular Carcinoma		1998	Indeterminate (neither Pre or Postmenopausal)	-22905	Alive	WITH TUMOR	5176			New Primary Tumor	Other, specify	Lung	4224		Negative		0	5176	0	5176	0	5176	1	4224
TCGA-B6-A3ZX-01	TCGA-B6-A3ZX	BRCA	50	FEMALE	BLACK OR AFRICAN AMERICAN	Stage IV		Mixed Histology (please specify)		2007	[Unknown]	-18434	Dead	WITH TUMOR		1152		Distant Metastasis	Bone		994		Negative		1	1152	1	1152			1	994
TCGA-B6-A400-01	TCGA-B6-A400	BRCA	43	FEMALE	BLACK OR AFRICAN AMERICAN	Stage IIIA		Infiltrating Ductal Carcinoma		2008	[Unknown]	-16022	Alive	TUMOR FREE	215								Negative		0	215	0	215	0	215	0	215
TCGA-B6-A401-01	TCGA-B6-A401	BRCA	47	FEMALE	BLACK OR AFRICAN AMERICAN	Stage IIA		Infiltrating Ductal Carcinoma		2007	[Unknown]	-17438	Alive	TUMOR FREE	2596								Negative		0	2596	0	2596	0	2596	0	2596
TCGA-B6-A402-01	TCGA-B6-A402	BRCA	47	FEMALE	BLACK OR AFRICAN AMERICAN	Stage I		Infiltrating Ductal Carcinoma		2008	[Unknown]	-17314	Alive	WITH TUMOR	2281			Locoregional Recurrence	Other, specify	breast	1516		Negative		0	2281	0	2281	1	1516	1	1516
TCGA-B6-A408-01	TCGA-B6-A408	BRCA	55	FEMALE	BLACK OR AFRICAN AMERICAN	Stage IIIC		Mixed Histology (please specify)		2008	[Unknown]	-20102	Alive	TUMOR FREE	2072								Negative		0	2072	0	2072	0	2072	0	2072
TCGA-B6-A409-01	TCGA-B6-A409	BRCA	44	FEMALE	BLACK OR AFRICAN AMERICAN	Stage IIIA		Infiltrating Ductal Carcinoma		2008	Pre (<6 months since LMP AND no prior bilateral ovariectomy AND not on estrogen replacement)	-16178	Dead	WITH TUMOR		573		Distant Metastasis	Lung		456		Negative		1	573	1	573	1	456	1	456
TCGA-B6-A40B-01	TCGA-B6-A40B	BRCA	76	FEMALE	WHITE	Stage I		Infiltrating Lobular Carcinoma		2005	Post (prior bilateral ovariectomy OR >12 mo since LMP with no prior hysterectomy)	-27811	Alive	TUMOR FREE	3152								Negative		0	3152	0	3152	0	3152	0	3152
TCGA-B6-A40C-01	TCGA-B6-A40C	BRCA	51	FEMALE	WHITE	Stage IIB		Infiltrating Lobular Carcinoma		2005	[Unknown]	-18852	Alive	TUMOR FREE	2164								Negative		0	2164	0	2164	0	2164	0	2164
TCGA-BH-A0AU-01	TCGA-BH-A0AU	BRCA	45	FEMALE	WHITE	Stage IIA		Infiltrating Ductal Carcinoma		2008	Pre (<6 months since LMP AND no prior bilateral ovariectomy AND not on estrogen replacement)	-16688	Alive	TUMOR FREE	1914								Negative		0	1914	0	1914	0	1914	0	1914
TCGA-BH-A0AU-11	TCGA-BH-A0AU	BRCA	45	FEMALE	WHITE	Stage IIA		Infiltrating Ductal Carcinoma		2008	Pre (<6 months since LMP AND no prior bilateral ovariectomy AND not on estrogen replacement)	-16688	Alive	TUMOR FREE	1914								Negative		0	1914	0	1914	0	1914	0	1914
TCGA-BH-A0AV-01	TCGA-BH-A0AV	BRCA	52	FEMALE	BLACK OR AFRICAN AMERICAN	Stage I		Infiltrating Ductal Carcinoma		2008		-19314	Alive	TUMOR FREE	1820								Negative		0	1820	0	1820	0	1820	0	1820
TCGA-BH-A0AW-01	TCGA-BH-A0AW	BRCA	56	FEMALE	WHITE	Stage IIA		Infiltrating Ductal Carcinoma		2008	Post (prior bilateral ovariectomy OR >12 mo since LMP with no prior hysterectomy)	-20468	Alive	TUMOR FREE	622								Negative		0	622	0	622	0	622	0	622
TCGA-BH-A0AY-01	TCGA-BH-A0AY	BRCA	62	FEMALE	WHITE	Stage IIA		Infiltrating Ductal Carcinoma		2008	Post (prior bilateral ovariectomy OR >12 mo since LMP with no prior hysterectomy)	-22703	Alive	TUMOR FREE	777								Negative		0	777	0	777	0	777	0	777
TCGA-BH-A0AY-11	TCGA-BH-A0AY	BRCA	62	FEMALE	WHITE	Stage IIA		Infiltrating Ductal Carcinoma		2008	Post (prior bilateral ovariectomy OR >12 mo since LMP with no prior hysterectomy)	-22703	Alive	TUMOR FREE	777								Negative		0	777	0	777	0	777	0	777
TCGA-BH-A0AZ-01	TCGA-BH-A0AZ	BRCA	47	FEMALE	WHITE	Stage IIIA		Infiltrating Ductal Carcinoma		2008	Pre (<6 months since LMP AND no prior bilateral ovariectomy AND not on estrogen replacement)	-17465	Alive	TUMOR FREE	1919								Negative		0	1919	0	1919	0	1919	0	1919
TCGA-BH-A0AZ-11	TCGA-BH-A0AZ	BRCA	47	FEMALE	WHITE	Stage IIIA		Infiltrating Ductal Carcinoma		2008	Pre (<6 months since LMP AND no prior bilateral ovariectomy AND not on estrogen replacement)	-17465	Alive	TUMOR FREE	1919								Negative		0	1919	0	1919	0	1919	0	1919
TCGA-BH-A0B0-01	TCGA-BH-A0B0	BRCA	56	FEMALE	BLACK OR AFRICAN AMERICAN	Stage I		Infiltrating Ductal Carcinoma		2006	Peri (6-12 months since last menstrual period)	-20776	Alive	TUMOR FREE	2477								Negative		0	2477	0	2477	0	2477	0	2477
TCGA-BH-A0B1-01	TCGA-BH-A0B1	BRCA	66	FEMALE	WHITE	Stage IIB		Infiltrating Ductal Carcinoma		2007	Post (prior bilateral ovariectomy OR >12 mo since LMP with no prior hysterectomy)	-24315	Alive	TUMOR FREE	1148								Negative		0	1148	0	1148	0	1148	0	1148
TCGA-BH-A0B3-01	TCGA-BH-A0B3	BRCA	53	FEMALE	WHITE	Stage IIB		Infiltrating Ductal Carcinoma		2007	Post (prior bilateral ovariectomy OR >12 mo since LMP with no prior hysterectomy)	-19479	Alive	TUMOR FREE	1203								Negative		0	1203	0	1203	0	1203	0	1203
TCGA-BH-A0B3-11	TCGA-BH-A0B3	BRCA	53	FEMALE	WHITE	Stage IIB		Infiltrating Ductal Carcinoma		2007	Post (prior bilateral ovariectomy OR >12 mo since LMP with no prior hysterectomy)	-19479	Alive	TUMOR FREE	1203								Negative		0	1203	0	1203	0	1203	0	1203
TCGA-BH-A0B4-01	TCGA-BH-A0B4	BRCA	65	MALE	WHITE	Stage IIIA		Infiltrating Ductal Carcinoma		2007		-23980	Alive	TUMOR FREE	1191								Negative		0	1191	0	1191	0	1191	0	1191
TCGA-BH-A0B5-01	TCGA-BH-A0B5	BRCA	40	FEMALE	WHITE	Stage IIIA		Infiltrating Lobular Carcinoma		2007	Pre (<6 months since LMP AND no prior bilateral ovariectomy AND not on estrogen replacement)	-14920	Alive	TUMOR FREE	2136								Positive		0	2136	0	2136			0	2136
TCGA-BH-A0B5-11	TCGA-BH-A0B5	BRCA	40	FEMALE	WHITE	Stage IIIA		Infiltrating Lobular Carcinoma		2007	Pre (<6 months since LMP AND no prior bilateral ovariectomy AND not on estrogen replacement)	-14920	Alive	TUMOR FREE	2136								Positive		0	2136	0	2136			0	2136
TCGA-BH-A0B6-01	TCGA-BH-A0B6	BRCA	47	FEMALE	WHITE	Stage I		Infiltrating Ductal Carcinoma		2006		-17346	Alive	TUMOR FREE	2483								Negative		0	2483	0	2483	0	2483	0	2483
TCGA-BH-A0B7-01	TCGA-BH-A0B7	BRCA	42	FEMALE	WHITE	Stage IIB		Infiltrating Ductal Carcinoma		2006	Pre (<6 months since LMP AND no prior bilateral ovariectomy AND not on estrogen replacement)	-15593	Alive	TUMOR FREE	2559								Negative		0	2559	0	2559	0	2559	0	2559
TCGA-BH-A0B7-11	TCGA-BH-A0B7	BRCA	42	FEMALE	WHITE	Stage IIB		Infiltrating Ductal Carcinoma		2006	Pre (<6 months since LMP AND no prior bilateral ovariectomy AND not on estrogen replacement)	-15593	Alive	TUMOR FREE	2559								Negative		0	2559	0	2559	0	2559	0	2559
TCGA-BH-A0B8-01	TCGA-BH-A0B8	BRCA	64	FEMALE	WHITE	Stage I		Infiltrating Ductal Carcinoma		2006	Post (prior bilateral ovariectomy OR >12 mo since LMP with no prior hysterectomy)	-23380	Alive	TUMOR FREE	1569								Negative		0	1569	0	1569	0	1569	0	1569
TCGA-BH-A0B8-11	TCGA-BH-A0B8	BRCA	64	FEMALE	WHITE	Stage I		Infiltrating Ductal Carcinoma		2006	Post (prior bilateral ovariectomy OR >12 mo since LMP with no prior hysterectomy)	-23380	Alive	TUMOR FREE	1569								Negative		0	1569	0	1569	0	1569	0	1569
TCGA-BH-A0B9-01	TCGA-BH-A0B9	BRCA	44	FEMALE	WHITE	Stage IA		Infiltrating Ductal Carcinoma		2006	Pre (<6 months since LMP AND no prior bilateral ovariectomy AND not on estrogen replacement)	-16310	Alive	TUMOR FREE	1572								Negative		0	1572	0	1572	0	1572	0	1572
TCGA-BH-A0BA-01	TCGA-BH-A0BA	BRCA	51	FEMALE	WHITE	Stage IIIC		Mixed Histology (please specify)		2006	Pre (<6 months since LMP AND no prior bilateral ovariectomy AND not on estrogen replacement)	-18839	Alive	TUMOR FREE	1132								Negative		0	1132	0	1132	0	1132	0	1132
TCGA-BH-A0BA-11	TCGA-BH-A0BA	BRCA	51	FEMALE	WHITE	Stage IIIC		Mixed Histology (please specify)		2006	Pre (<6 months since LMP AND no prior bilateral ovariectomy AND not on estrogen replacement)	-18839	Alive	TUMOR FREE	1132								Negative		0	1132	0	1132	0	1132	0	1132
TCGA-BH-A0BC-01	TCGA-BH-A0BC	BRCA	60	FEMALE	WHITE	Stage IIIC		Infiltrating Ductal Carcinoma		2007	Post (prior bilateral ovariectomy OR >12 mo since LMP with no prior hysterectomy)	-21949	Alive	TUMOR FREE	974								Negative		0	974	0	974	0	974	0	974
TCGA-BH-A0BC-11	TCGA-BH-A0BC	BRCA	60	FEMALE	WHITE	Stage IIIC		Infiltrating Ductal Carcinoma		2007	Post (prior bilateral ovariectomy OR >12 mo since LMP with no prior hysterectomy)	-21949	Alive	TUMOR FREE	974								Negative		0	974	0	974	0	974	0	974
TCGA-BH-A0BD-01	TCGA-BH-A0BD	BRCA	47	FEMALE	WHITE	Stage IIA		Infiltrating Ductal Carcinoma		2009	Pre (<6 months since LMP AND no prior bilateral ovariectomy AND not on estrogen replacement)	-17275	Alive	TUMOR FREE	554								Negative		0	554	0	554	0	554	0	554
TCGA-BH-A0BF-01	TCGA-BH-A0BF	BRCA	56	FEMALE	WHITE	Stage IIB		Infiltrating Ductal Carcinoma		2009	Post (prior bilateral ovariectomy OR >12 mo since LMP with no prior hysterectomy)	-20691	Dead	TUMOR FREE		1324							Negative		1	1324	0	1324	0	1324	0	1324
TCGA-BH-A0BF-11	TCGA-BH-A0BF	BRCA	56	FEMALE	WHITE	Stage IIB		Infiltrating Ductal Carcinoma		2009	Post (prior bilateral ovariectomy OR >12 mo since LMP with no prior hysterectomy)	-20691	Dead	TUMOR FREE		1324							Negative		1	1324	0	1324	0	1324	0	1324
TCGA-BH-A0BG-01	TCGA-BH-A0BG	BRCA	73	FEMALE	WHITE	Stage I		Infiltrating Ductal Carcinoma		2008	Post (prior bilateral ovariectomy OR >12 mo since LMP with no prior hysterectomy)	-26988	Alive	TUMOR FREE	1871								Negative		0	1871	0	1871	0	1871	0	1871
TCGA-BH-A0BJ-01	TCGA-BH-A0BJ	BRCA	41	FEMALE	WHITE	Stage IIB		Infiltrating Ductal Carcinoma		2008	Pre (<6 months since LMP AND no prior bilateral ovariectomy AND not on estrogen replacement)	-15027	Alive	TUMOR FREE	660								Negative		0	660	0	660	0	660	0	660
TCGA-BH-A0BJ-11	TCGA-BH-A0BJ	BRCA	41	FEMALE	WHITE	Stage IIB		Infiltrating Ductal Carcinoma		2008	Pre (<6 months since LMP AND no prior bilateral ovariectomy AND not on estrogen replacement)	-15027	Alive	TUMOR FREE	660								Negative		0	660	0	660	0	660	0	660
TCGA-BH-A0BL-01	TCGA-BH-A0BL	BRCA	35	FEMALE	WHITE	Stage I		Infiltrating Ductal Carcinoma		2007	Pre (<6 months since LMP AND no prior bilateral ovariectomy AND not on estrogen replacement)	-12841	Alive	TUMOR FREE	2278								Negative		0	2278	0	2278	0	2278	0	2278
TCGA-BH-A0BL-11	TCGA-BH-A0BL	BRCA	35	FEMALE	WHITE	Stage I		Infiltrating Ductal Carcinoma		2007	Pre (<6 months since LMP AND no prior bilateral ovariectomy AND not on estrogen replacement)	-12841	Alive	TUMOR FREE	2278								Negative		0	2278	0	2278	0	2278	0	2278
TCGA-BH-A0BM-01	TCGA-BH-A0BM	BRCA	54	FEMALE	WHITE	Stage IIB		Infiltrating Ductal Carcinoma		2007	Post (prior bilateral ovariectomy OR >12 mo since LMP with no prior hysterectomy)	-20049	Alive	TUMOR FREE	1876								Negative		0	1876	0	1876	0	1876	0	1876
TCGA-BH-A0BM-11	TCGA-BH-A0BM	BRCA	54	FEMALE	WHITE	Stage IIB		Infiltrating Ductal Carcinoma		2007	Post (prior bilateral ovariectomy OR >12 mo since LMP with no prior hysterectomy)	-20049	Alive	TUMOR FREE	1876								Negative		0	1876	0	1876	0	1876	0	1876
TCGA-BH-A0BO-01	TCGA-BH-A0BO	BRCA	54	FEMALE	WHITE	Stage I		Infiltrating Ductal Carcinoma		2007	Pre (<6 months since LMP AND no prior bilateral ovariectomy AND not on estrogen replacement)	-19767	Alive	TUMOR FREE	2197								Negative		0	2197	0	2197	0	2197	0	2197
TCGA-BH-A0BO-11	TCGA-BH-A0BO	BRCA	54	FEMALE	WHITE	Stage I		Infiltrating Ductal Carcinoma		2007	Pre (<6 months since LMP AND no prior bilateral ovariectomy AND not on estrogen replacement)	-19767	Alive	TUMOR FREE	2197								Negative		0	2197	0	2197	0	2197	0	2197
TCGA-BH-A0BP-01	TCGA-BH-A0BP	BRCA	76	FEMALE	WHITE	Stage I		Infiltrating Ductal Carcinoma		2006	Post (prior bilateral ovariectomy OR >12 mo since LMP with no prior hysterectomy)	-27917	Dead	TUMOR FREE		2296							Negative		1	2296	0	2296	0	2296	0	2296
TCGA-BH-A0BQ-01	TCGA-BH-A0BQ	BRCA	39	FEMALE	WHITE	Stage I		Infiltrating Ductal Carcinoma		2007	Pre (<6 months since LMP AND no prior bilateral ovariectomy AND not on estrogen replacement)	-14494	Alive	TUMOR FREE	2255			Locoregional Recurrence	Other, specify	Dermis and epidermis	1709		Negative		0	2255	0	2255	1	1709	1	1709
TCGA-BH-A0BQ-11	TCGA-BH-A0BQ	BRCA	39	FEMALE	WHITE	Stage I		Infiltrating Ductal Carcinoma		2007	Pre (<6 months since LMP AND no prior bilateral ovariectomy AND not on estrogen replacement)	-14494	Alive	TUMOR FREE	2255			Locoregional Recurrence	Other, specify	Dermis and epidermis	1709		Negative		0	2255	0	2255	1	1709	1	1709
TCGA-BH-A0BR-01	TCGA-BH-A0BR	BRCA	59	FEMALE	WHITE	Stage I		Infiltrating Ductal Carcinoma		2007	Post (prior bilateral ovariectomy OR >12 mo since LMP with no prior hysterectomy)	-21622	Alive	TUMOR FREE	2330								Negative		0	2330	0	2330	0	2330	0	2330
TCGA-BH-A0BS-01	TCGA-BH-A0BS	BRCA	55	FEMALE	WHITE	Stage IIIA		Infiltrating Ductal Carcinoma		2007	Post (prior bilateral ovariectomy OR >12 mo since LMP with no prior hysterectomy)	-20374	Alive	TUMOR FREE	2612								Negative		0	2612	0	2612	0	2612	0	2612
TCGA-BH-A0BS-11	TCGA-BH-A0BS	BRCA	55	FEMALE	WHITE	Stage IIIA		Infiltrating Ductal Carcinoma		2007	Post (prior bilateral ovariectomy OR >12 mo since LMP with no prior hysterectomy)	-20374	Alive	TUMOR FREE	2612								Negative		0	2612	0	2612	0	2612	0	2612
TCGA-BH-A0BT-01	TCGA-BH-A0BT	BRCA	56	FEMALE	WHITE	Stage IIA		Infiltrating Ductal Carcinoma		2007		-20625	Alive	TUMOR FREE	2365								Negative		0	2365	0	2365	0	2365	0	2365
TCGA-BH-A0BT-11	TCGA-BH-A0BT	BRCA	56	FEMALE	WHITE	Stage IIA		Infiltrating Ductal Carcinoma		2007		-20625	Alive	TUMOR FREE	2365								Negative		0	2365	0	2365	0	2365	0	2365
TCGA-BH-A0BV-01	TCGA-BH-A0BV	BRCA	78	FEMALE	WHITE	Stage IIB		Infiltrating Ductal Carcinoma		2006	Post (prior bilateral ovariectomy OR >12 mo since LMP with no prior hysterectomy)	-28699	Alive	TUMOR FREE	1519								Negative		0	1519	0	1519	0	1519	0	1519
TCGA-BH-A0BV-11	TCGA-BH-A0BV	BRCA	78	FEMALE	WHITE	Stage IIB		Infiltrating Ductal Carcinoma		2006	Post (prior bilateral ovariectomy OR >12 mo since LMP with no prior hysterectomy)	-28699	Alive	TUMOR FREE	1519								Negative		0	1519	0	1519	0	1519	0	1519
TCGA-BH-A0BW-01	TCGA-BH-A0BW	BRCA	71	FEMALE	BLACK OR AFRICAN AMERICAN	Stage I		Infiltrating Ductal Carcinoma		2006	Post (prior bilateral ovariectomy OR >12 mo since LMP with no prior hysterectomy)	-25974	Alive	TUMOR FREE	2371								Negative		0	2371	0	2371	0	2371	0	2371
TCGA-BH-A0BW-11	TCGA-BH-A0BW	BRCA	71	FEMALE	BLACK OR AFRICAN AMERICAN	Stage I		Infiltrating Ductal Carcinoma		2006	Post (prior bilateral ovariectomy OR >12 mo since LMP with no prior hysterectomy)	-25974	Alive	TUMOR FREE	2371								Negative		0	2371	0	2371	0	2371	0	2371
TCGA-BH-A0BZ-01	TCGA-BH-A0BZ	BRCA	59	FEMALE	WHITE	Stage IIIA		Infiltrating Ductal Carcinoma		2007	Post (prior bilateral ovariectomy OR >12 mo since LMP with no prior hysterectomy)	-21856	Alive	TUMOR FREE	2255								Negative		0	2255	0	2255	0	2255	0	2255
TCGA-BH-A0BZ-11	TCGA-BH-A0BZ	BRCA	59	FEMALE	WHITE	Stage IIIA		Infiltrating Ductal Carcinoma		2007	Post (prior bilateral ovariectomy OR >12 mo since LMP with no prior hysterectomy)	-21856	Alive	TUMOR FREE	2255								Negative		0	2255	0	2255	0	2255	0	2255
TCGA-BH-A0C0-01	TCGA-BH-A0C0	BRCA	62	FEMALE	WHITE	Stage IIA		Infiltrating Ductal Carcinoma		2007	Post (prior bilateral ovariectomy OR >12 mo since LMP with no prior hysterectomy)	-23006	Alive	TUMOR FREE	1270								Negative		0	1270	0	1270	0	1270	0	1270
TCGA-BH-A0C0-11	TCGA-BH-A0C0	BRCA	62	FEMALE	WHITE	Stage IIA		Infiltrating Ductal Carcinoma		2007	Post (prior bilateral ovariectomy OR >12 mo since LMP with no prior hysterectomy)	-23006	Alive	TUMOR FREE	1270								Negative		0	1270	0	1270	0	1270	0	1270
TCGA-BH-A0C1-01	TCGA-BH-A0C1	BRCA	61	FEMALE	WHITE	Stage IIIA		Infiltrating Lobular Carcinoma		2007	Post (prior bilateral ovariectomy OR >12 mo since LMP with no prior hysterectomy)	-22377	Dead	WITH TUMOR		1411		Distant Metastasis	Bone		1123		Negative		1	1411	1	1411	1	1123	1	1123
TCGA-BH-A0C3-01	TCGA-BH-A0C3	BRCA	47	FEMALE	WHITE	Stage I		Mixed Histology (please specify)		2006	Pre (<6 months since LMP AND no prior bilateral ovariectomy AND not on estrogen replacement)	-17221	Alive	WITH TUMOR	2709			Distant Metastasis	Bone		2674		Negative		0	2709	0	2709	1	2674	1	2674
TCGA-BH-A0C3-11	TCGA-BH-A0C3	BRCA	47	FEMALE	WHITE	Stage I		Mixed Histology (please specify)		2006	Pre (<6 months since LMP AND no prior bilateral ovariectomy AND not on estrogen replacement)	-17221	Alive	WITH TUMOR	2709			Distant Metastasis	Bone		2674		Negative		0	2709	0	2709	1	2674	1	2674
TCGA-BH-A0C7-01	TCGA-BH-A0C7	BRCA	48	FEMALE	WHITE	Stage IIB		Infiltrating Ductal Carcinoma		2006	Peri (6-12 months since last menstrual period)	-17871	Alive	TUMOR FREE	2767								Negative		0	2767	0	2767	0	2767	0	2767
TCGA-BH-A0DD-01	TCGA-BH-A0DD	BRCA	58	MALE	WHITE	Stage IIB		Infiltrating Ductal Carcinoma		2006		-21386	Alive	TUMOR FREE	2486								Negative		0	2486	0	2486	0	2486	0	2486
TCGA-BH-A0DD-11	TCGA-BH-A0DD	BRCA	58	MALE	WHITE	Stage IIB		Infiltrating Ductal Carcinoma		2006		-21386	Alive	TUMOR FREE	2486								Negative		0	2486	0	2486	0	2486	0	2486
TCGA-BH-A0DE-01	TCGA-BH-A0DE	BRCA	62	FEMALE	WHITE	Stage IIA		Infiltrating Ductal Carcinoma		2007	Post (prior bilateral ovariectomy OR >12 mo since LMP with no prior hysterectomy)	-22656	Alive	TUMOR FREE	2372								Negative		0	2372	0	2372	0	2372	0	2372
TCGA-BH-A0DE-11	TCGA-BH-A0DE	BRCA	62	FEMALE	WHITE	Stage IIA		Infiltrating Ductal Carcinoma		2007	Post (prior bilateral ovariectomy OR >12 mo since LMP with no prior hysterectomy)	-22656	Alive	TUMOR FREE	2372								Negative		0	2372	0	2372	0	2372	0	2372
TCGA-BH-A0DG-01	TCGA-BH-A0DG	BRCA	30	FEMALE	BLACK OR AFRICAN AMERICAN	Stage IIA		Infiltrating Ductal Carcinoma		2007	Pre (<6 months since LMP AND no prior bilateral ovariectomy AND not on estrogen replacement)	-11204	Alive	TUMOR FREE	2041								Negative		0	2041	0	2041	0	2041	0	2041
TCGA-BH-A0DG-11	TCGA-BH-A0DG	BRCA	30	FEMALE	BLACK OR AFRICAN AMERICAN	Stage IIA		Infiltrating Ductal Carcinoma		2007	Pre (<6 months since LMP AND no prior bilateral ovariectomy AND not on estrogen replacement)	-11204	Alive	TUMOR FREE	2041								Negative		0	2041	0	2041	0	2041	0	2041
TCGA-BH-A0DH-01	TCGA-BH-A0DH	BRCA	63	FEMALE	WHITE	Stage IIB		Infiltrating Ductal Carcinoma		2007	Post (prior bilateral ovariectomy OR >12 mo since LMP with no prior hysterectomy)	-23366	Alive	TUMOR FREE	1156								Negative		0	1156	0	1156	0	1156	0	1156
TCGA-BH-A0DH-11	TCGA-BH-A0DH	BRCA	63	FEMALE	WHITE	Stage IIB		Infiltrating Ductal Carcinoma		2007	Post (prior bilateral ovariectomy OR >12 mo since LMP with no prior hysterectomy)	-23366	Alive	TUMOR FREE	1156								Negative		0	1156	0	1156	0	1156	0	1156
TCGA-BH-A0DI-01	TCGA-BH-A0DI	BRCA	63	FEMALE	WHITE	Stage IIB		Infiltrating Ductal Carcinoma		2009	Post (prior bilateral ovariectomy OR >12 mo since LMP with no prior hysterectomy)	-23327	Alive	TUMOR FREE	912								Negative		0	912	0	912	0	912	0	912
TCGA-BH-A0DI-11	TCGA-BH-A0DI	BRCA	63	FEMALE	WHITE	Stage IIB		Infiltrating Ductal Carcinoma		2009	Post (prior bilateral ovariectomy OR >12 mo since LMP with no prior hysterectomy)	-23327	Alive	TUMOR FREE	912								Negative		0	912	0	912	0	912	0	912
TCGA-BH-A0DK-01	TCGA-BH-A0DK	BRCA	49	FEMALE	WHITE	Stage IIA		Infiltrating Ductal Carcinoma		2009	Pre (<6 months since LMP AND no prior bilateral ovariectomy AND not on estrogen replacement)	-18237	Alive	TUMOR FREE	423								Negative		0	423	0	423	0	423	0	423
TCGA-BH-A0DK-11	TCGA-BH-A0DK	BRCA	49	FEMALE	WHITE	Stage IIA		Infiltrating Ductal Carcinoma		2009	Pre (<6 months since LMP AND no prior bilateral ovariectomy AND not on estrogen replacement)	-18237	Alive	TUMOR FREE	423								Negative		0	423	0	423	0	423	0	423
TCGA-BH-A0DL-01	TCGA-BH-A0DL	BRCA	64	FEMALE	WHITE	Stage IIA		Other, specify		2007	Post (prior bilateral ovariectomy OR >12 mo since LMP with no prior hysterectomy)	-23628	Alive	TUMOR FREE	2381								Negative		0	2381	0	2381	0	2381	0	2381
TCGA-BH-A0DL-11	TCGA-BH-A0DL	BRCA	64	FEMALE	WHITE	Stage IIA		Other, specify		2007	Post (prior bilateral ovariectomy OR >12 mo since LMP with no prior hysterectomy)	-23628	Alive	TUMOR FREE	2381								Negative		0	2381	0	2381	0	2381	0	2381
TCGA-BH-A0DO-01	TCGA-BH-A0DO	BRCA	78	FEMALE	WHITE	Stage I		Infiltrating Ductal Carcinoma		2009	Post (prior bilateral ovariectomy OR >12 mo since LMP with no prior hysterectomy)	-28529	Alive	TUMOR FREE	1644								Negative		0	1644	0	1644	0	1644	0	1644
TCGA-BH-A0DO-11	TCGA-BH-A0DO	BRCA	78	FEMALE	WHITE	Stage I		Infiltrating Ductal Carcinoma		2009	Post (prior bilateral ovariectomy OR >12 mo since LMP with no prior hysterectomy)	-28529	Alive	TUMOR FREE	1644								Negative		0	1644	0	1644	0	1644	0	1644
TCGA-BH-A0DP-01	TCGA-BH-A0DP	BRCA	60	FEMALE	WHITE	Stage IIB		Infiltrating Lobular Carcinoma		2009	Post (prior bilateral ovariectomy OR >12 mo since LMP with no prior hysterectomy)	-22199	Alive	TUMOR FREE	476								Negative		0	476	0	476	0	476	0	476
TCGA-BH-A0DP-11	TCGA-BH-A0DP	BRCA	60	FEMALE	WHITE	Stage IIB		Infiltrating Lobular Carcinoma		2009	Post (prior bilateral ovariectomy OR >12 mo since LMP with no prior hysterectomy)	-22199	Alive	TUMOR FREE	476								Negative		0	476	0	476	0	476	0	476
TCGA-BH-A0DQ-01	TCGA-BH-A0DQ	BRCA	42	FEMALE	WHITE	Stage IIB		Infiltrating Ductal Carcinoma		2009	Pre (<6 months since LMP AND no prior bilateral ovariectomy AND not on estrogen replacement)	-15533	Alive	TUMOR FREE	98								Negative		0	98	0	98	0	98	0	98
TCGA-BH-A0DQ-11	TCGA-BH-A0DQ	BRCA	42	FEMALE	WHITE	Stage IIB		Infiltrating Ductal Carcinoma		2009	Pre (<6 months since LMP AND no prior bilateral ovariectomy AND not on estrogen replacement)	-15533	Alive	TUMOR FREE	98								Negative		0	98	0	98	0	98	0	98
TCGA-BH-A0DS-01	TCGA-BH-A0DS	BRCA	71	FEMALE	WHITE	Stage IIIA		Infiltrating Ductal Carcinoma		2010	Post (prior bilateral ovariectomy OR >12 mo since LMP with no prior hysterectomy)	-25944	Alive	TUMOR FREE	78								Negative		0	78	0	78	0	78	0	78
TCGA-BH-A0DT-01	TCGA-BH-A0DT	BRCA	41	FEMALE	WHITE	Stage IIA		Infiltrating Ductal Carcinoma		2007	Pre (<6 months since LMP AND no prior bilateral ovariectomy AND not on estrogen replacement)	-15078	Alive	TUMOR FREE	2403								Negative		0	2403	0	2403	0	2403	0	2403
TCGA-BH-A0DT-11	TCGA-BH-A0DT	BRCA	41	FEMALE	WHITE	Stage IIA		Infiltrating Ductal Carcinoma		2007	Pre (<6 months since LMP AND no prior bilateral ovariectomy AND not on estrogen replacement)	-15078	Alive	TUMOR FREE	2403								Negative		0	2403	0	2403	0	2403	0	2403
TCGA-BH-A0DV-01	TCGA-BH-A0DV	BRCA	54	FEMALE	WHITE	Stage IIIA		Infiltrating Ductal Carcinoma		2007	Peri (6-12 months since last menstrual period)	-19781	Alive	TUMOR FREE	2064								Negative		0	2064	0	2064	0	2064	0	2064
TCGA-BH-A0DV-11	TCGA-BH-A0DV	BRCA	54	FEMALE	WHITE	Stage IIIA		Infiltrating Ductal Carcinoma		2007	Peri (6-12 months since last menstrual period)	-19781	Alive	TUMOR FREE	2064								Negative		0	2064	0	2064	0	2064	0	2064
TCGA-BH-A0DX-01	TCGA-BH-A0DX	BRCA	62	FEMALE	WHITE	Stage I		Infiltrating Ductal Carcinoma		2007	Post (prior bilateral ovariectomy OR >12 mo since LMP with no prior hysterectomy)	-22833	Alive	TUMOR FREE	2156								Negative		0	2156	0	2156	0	2156	0	2156
TCGA-BH-A0DZ-01	TCGA-BH-A0DZ	BRCA	43	FEMALE	WHITE	Stage IIB		Infiltrating Ductal Carcinoma		2009	Pre (<6 months since LMP AND no prior bilateral ovariectomy AND not on estrogen replacement)	-15980	Alive	TUMOR FREE	495								Negative		0	495	0	495	0	495	0	495
TCGA-BH-A0DZ-11	TCGA-BH-A0DZ	BRCA	43	FEMALE	WHITE	Stage IIB		Infiltrating Ductal Carcinoma		2009	Pre (<6 months since LMP AND no prior bilateral ovariectomy AND not on estrogen replacement)	-15980	Alive	TUMOR FREE	495								Negative		0	495	0	495	0	495	0	495
TCGA-BH-A0E0-01	TCGA-BH-A0E0	BRCA	38	FEMALE	WHITE	Stage IIIC		Infiltrating Ductal Carcinoma		2009	Pre (<6 months since LMP AND no prior bilateral ovariectomy AND not on estrogen replacement)	-14175	Alive	TUMOR FREE	134								Negative		0	134	0	134	0	134	0	134
TCGA-BH-A0E0-11	TCGA-BH-A0E0	BRCA	38	FEMALE	WHITE	Stage IIIC		Infiltrating Ductal Carcinoma		2009	Pre (<6 months since LMP AND no prior bilateral ovariectomy AND not on estrogen replacement)	-14175	Alive	TUMOR FREE	134								Negative		0	134	0	134	0	134	0	134
TCGA-BH-A0E1-01	TCGA-BH-A0E1	BRCA	52	FEMALE	WHITE	Stage IIB		Infiltrating Ductal Carcinoma		2009	Peri (6-12 months since last menstrual period)	-19192	Alive	TUMOR FREE	477								Negative		0	477	0	477	0	477	0	477
TCGA-BH-A0E1-11	TCGA-BH-A0E1	BRCA	52	FEMALE	WHITE	Stage IIB		Infiltrating Ductal Carcinoma		2009	Peri (6-12 months since last menstrual period)	-19192	Alive	TUMOR FREE	477								Negative		0	477	0	477	0	477	0	477
TCGA-BH-A0E2-01	TCGA-BH-A0E2	BRCA	49	FEMALE	BLACK OR AFRICAN AMERICAN	Stage IIIA		Infiltrating Ductal Carcinoma		2009	Pre (<6 months since LMP AND no prior bilateral ovariectomy AND not on estrogen replacement)	-18152	Alive	TUMOR FREE	435								Negative		0	435	0	435	0	435	0	435
TCGA-BH-A0E6-01	TCGA-BH-A0E6	BRCA	69	FEMALE	WHITE	Stage IA		Infiltrating Ductal Carcinoma		2009	Post (prior bilateral ovariectomy OR >12 mo since LMP with no prior hysterectomy)	-25408	Alive	TUMOR FREE	293								Negative		0	293	0	293	0	293	0	293
TCGA-BH-A0E7-01	TCGA-BH-A0E7	BRCA	79	FEMALE	WHITE	Stage IIB		Infiltrating Ductal Carcinoma		2006	Post (prior bilateral ovariectomy OR >12 mo since LMP with no prior hysterectomy)	-29115	Alive	TUMOR FREE	1363								Negative		0	1363	0	1363	0	1363	0	1363
TCGA-BH-A0E9-01	TCGA-BH-A0E9	BRCA	53	FEMALE	WHITE	Stage IIB		Infiltrating Lobular Carcinoma		2006	Post (prior bilateral ovariectomy OR >12 mo since LMP with no prior hysterectomy)	-19415	Alive	TUMOR FREE	2489								Negative		0	2489	0	2489	0	2489	0	2489
TCGA-BH-A0EA-01	TCGA-BH-A0EA	BRCA	72	FEMALE	WHITE	Stage IIA		Infiltrating Ductal Carcinoma		2008	Post (prior bilateral ovariectomy OR >12 mo since LMP with no prior hysterectomy)	-26548	Dead	TUMOR FREE		991							Negative		1	991	0	991	0	991	0	991
TCGA-BH-A0EB-01	TCGA-BH-A0EB	BRCA	69	FEMALE	WHITE	Stage IA		Infiltrating Ductal Carcinoma		2008	Post (prior bilateral ovariectomy OR >12 mo since LMP with no prior hysterectomy)	-25259	Alive	TUMOR FREE	745								Negative		0	745	0	745	0	745	0	745
TCGA-BH-A0EE-01	TCGA-BH-A0EE	BRCA	68	FEMALE	WHITE	Stage IIB		Infiltrating Ductal Carcinoma		2007	Post (prior bilateral ovariectomy OR >12 mo since LMP with no prior hysterectomy)	-24850	Alive	TUMOR FREE	943								Negative		0	943	0	943	0	943	0	943
TCGA-BH-A0EI-01	TCGA-BH-A0EI	BRCA	51	FEMALE	WHITE	Stage IIA		Infiltrating Ductal Carcinoma		2008	Peri (6-12 months since last menstrual period)	-18741	Alive	TUMOR FREE	1926								Negative		0	1926	0	1926	0	1926	0	1926
TCGA-BH-A0GY-01	TCGA-BH-A0GY	BRCA	67	FEMALE	WHITE	Stage IIA		Infiltrating Ductal Carcinoma		2008	Post (prior bilateral ovariectomy OR >12 mo since LMP with no prior hysterectomy)	-24493	Alive	TUMOR FREE	923								Negative		0	923	0	923	0	923	0	923
TCGA-BH-A0GZ-01	TCGA-BH-A0GZ	BRCA	62	FEMALE	WHITE	Stage IIA		Infiltrating Ductal Carcinoma		2009	Post (prior bilateral ovariectomy OR >12 mo since LMP with no prior hysterectomy)	-22714	Alive	TUMOR FREE	328								Negative		0	328	0	328	0	328	0	328
TCGA-BH-A0H0-01	TCGA-BH-A0H0	BRCA	69	FEMALE	WHITE	Stage IA		Infiltrating Ductal Carcinoma		2009	Post (prior bilateral ovariectomy OR >12 mo since LMP with no prior hysterectomy)	-25223	Alive	TUMOR FREE	461								Negative		0	461	0	461	0	461	0	461
TCGA-BH-A0H3-01	TCGA-BH-A0H3	BRCA	46	FEMALE	WHITE	Stage I		Infiltrating Ductal Carcinoma		2008	Pre (<6 months since LMP AND no prior bilateral ovariectomy AND not on estrogen replacement)	-17152	Alive	TUMOR FREE	1928								Negative		0	1928	0	1928	0	1928	0	1928
TCGA-BH-A0H5-01	TCGA-BH-A0H5	BRCA	45	FEMALE	WHITE	Stage I		Infiltrating Ductal Carcinoma		2008	Post (prior bilateral ovariectomy OR >12 mo since LMP with no prior hysterectomy)	-16719	Alive	TUMOR FREE	1620								Negative		0	1620	0	1620	0	1620	0	1620
TCGA-BH-A0H5-11	TCGA-BH-A0H5	BRCA	45	FEMALE	WHITE	Stage I		Infiltrating Ductal Carcinoma		2008	Post (prior bilateral ovariectomy OR >12 mo since LMP with no prior hysterectomy)	-16719	Alive	TUMOR FREE	1620								Negative		0	1620	0	1620	0	1620	0	1620
TCGA-BH-A0H6-01	TCGA-BH-A0H6	BRCA	82	FEMALE	WHITE	Stage I		Infiltrating Ductal Carcinoma		2008	Post (prior bilateral ovariectomy OR >12 mo since LMP with no prior hysterectomy)	-30125	Alive	TUMOR FREE	747								Negative		0	747	0	747	0	747	0	747
TCGA-BH-A0H7-01	TCGA-BH-A0H7	BRCA	65	FEMALE	WHITE	Stage IIIA		Infiltrating Ductal Carcinoma		2008	Post (prior bilateral ovariectomy OR >12 mo since LMP with no prior hysterectomy)	-23972	Alive	TUMOR FREE	702								Negative		0	702	0	702	0	702	0	702
TCGA-BH-A0H7-11	TCGA-BH-A0H7	BRCA	65	FEMALE	WHITE	Stage IIIA		Infiltrating Ductal Carcinoma		2008	Post (prior bilateral ovariectomy OR >12 mo since LMP with no prior hysterectomy)	-23972	Alive	TUMOR FREE	702								Negative		0	702	0	702	0	702	0	702
TCGA-BH-A0H9-01	TCGA-BH-A0H9	BRCA	69	FEMALE	WHITE	Stage IIA		Infiltrating Ductal Carcinoma		2007	Post (prior bilateral ovariectomy OR >12 mo since LMP with no prior hysterectomy)	-25289	Alive	TUMOR FREE	1247								Negative		0	1247	0	1247	0	1247	0	1247
TCGA-BH-A0H9-11	TCGA-BH-A0H9	BRCA	69	FEMALE	WHITE	Stage IIA		Infiltrating Ductal Carcinoma		2007	Post (prior bilateral ovariectomy OR >12 mo since LMP with no prior hysterectomy)	-25289	Alive	TUMOR FREE	1247								Negative		0	1247	0	1247	0	1247	0	1247
TCGA-BH-A0HA-01	TCGA-BH-A0HA	BRCA	31	FEMALE	WHITE	Stage I		Infiltrating Ductal Carcinoma		2008	Pre (<6 months since LMP AND no prior bilateral ovariectomy AND not on estrogen replacement)	-11379	Alive	TUMOR FREE	1611								Negative		0	1611	0	1611	0	1611	0	1611
TCGA-BH-A0HA-11	TCGA-BH-A0HA	BRCA	31	FEMALE	WHITE	Stage I		Infiltrating Ductal Carcinoma		2008	Pre (<6 months since LMP AND no prior bilateral ovariectomy AND not on estrogen replacement)	-11379	Alive	TUMOR FREE	1611								Negative		0	1611	0	1611	0	1611	0	1611
TCGA-BH-A0HB-01	TCGA-BH-A0HB	BRCA	55	FEMALE	WHITE	Stage IA		Infiltrating Ductal Carcinoma		2008	Post (prior bilateral ovariectomy OR >12 mo since LMP with no prior hysterectomy)	-20448	Alive	TUMOR FREE	806								Negative		0	806	0	806	0	806	0	806
TCGA-BH-A0HF-01	TCGA-BH-A0HF	BRCA	77	FEMALE	WHITE	Stage IA		Infiltrating Ductal Carcinoma		2008	Post (prior bilateral ovariectomy OR >12 mo since LMP with no prior hysterectomy)	-28233	Alive	TUMOR FREE	727								Negative		0	727	0	727	0	727	0	727
TCGA-BH-A0HI-01	TCGA-BH-A0HI	BRCA	78	FEMALE	WHITE	Stage IA		Infiltrating Ductal Carcinoma		2008	Post (prior bilateral ovariectomy OR >12 mo since LMP with no prior hysterectomy)	-28644	Alive	TUMOR FREE	620								Negative		0	620	0	620	0	620	0	620
TCGA-BH-A0HK-01	TCGA-BH-A0HK	BRCA	81	FEMALE	WHITE	Stage IIB		Infiltrating Ductal Carcinoma		2010	Post (prior bilateral ovariectomy OR >12 mo since LMP with no prior hysterectomy)	-29751	Alive	TUMOR FREE	178								Negative		0	178	0	178	0	178	0	178
TCGA-BH-A0HK-11	TCGA-BH-A0HK	BRCA	81	FEMALE	WHITE	Stage IIB		Infiltrating Ductal Carcinoma		2010	Post (prior bilateral ovariectomy OR >12 mo since LMP with no prior hysterectomy)	-29751	Alive	TUMOR FREE	178								Negative		0	178	0	178	0	178	0	178
TCGA-BH-A0HL-01	TCGA-BH-A0HL	BRCA	56	FEMALE	WHITE	Stage IIB		Infiltrating Ductal Carcinoma		2009	Post (prior bilateral ovariectomy OR >12 mo since LMP with no prior hysterectomy)	-20804	Alive	TUMOR FREE	72								Negative		0	72	0	72	0	72	0	72	Redacted
TCGA-BH-A0HN-01	TCGA-BH-A0HN	BRCA	67	FEMALE	WHITE	Stage IA		Infiltrating Ductal Carcinoma		2009	Post (prior bilateral ovariectomy OR >12 mo since LMP with no prior hysterectomy)	-24731	Alive	TUMOR FREE	516								Negative		0	516	0	516	0	516	0	516	Redacted
TCGA-BH-A0HO-01	TCGA-BH-A0HO	BRCA	48	FEMALE	WHITE	Stage IIA		Infiltrating Ductal Carcinoma		2009	Pre (<6 months since LMP AND no prior bilateral ovariectomy AND not on estrogen replacement)	-17710	Alive	TUMOR FREE	76								Negative		0	76	0	76	0	76	0	76
TCGA-BH-A0HP-01	TCGA-BH-A0HP	BRCA	65	FEMALE	WHITE	Stage IIIA		Infiltrating Lobular Carcinoma		2009	Post (prior bilateral ovariectomy OR >12 mo since LMP with no prior hysterectomy)	-23883	Alive	TUMOR FREE	414								Negative		0	414	0	414	0	414	0	414
TCGA-BH-A0HQ-01	TCGA-BH-A0HQ	BRCA	56	FEMALE	WHITE	Stage IIA		Infiltrating Ductal Carcinoma		2007	Post (prior bilateral ovariectomy OR >12 mo since LMP with no prior hysterectomy)	-20719	Alive	TUMOR FREE	1121								Negative		0	1121	0	1121	0	1121	0	1121
TCGA-BH-A0HU-01	TCGA-BH-A0HU	BRCA	52	FEMALE	WHITE	Stage IA		Infiltrating Ductal Carcinoma		2009	Peri (6-12 months since last menstrual period)	-19216	Alive	TUMOR FREE	392								Negative		0	392	0	392	0	392	0	392
TCGA-BH-A0HW-01	TCGA-BH-A0HW	BRCA	62	FEMALE	ASIAN	Stage IA		Infiltrating Ductal Carcinoma		2006	Post (prior bilateral ovariectomy OR >12 mo since LMP with no prior hysterectomy)	-22962	Alive	TUMOR FREE	1561								Negative		0	1561	0	1561	0	1561	0	1561
TCGA-BH-A0HX-01	TCGA-BH-A0HX	BRCA	54	FEMALE	WHITE	Stage IIB		Infiltrating Ductal Carcinoma		2008	Post (prior bilateral ovariectomy OR >12 mo since LMP with no prior hysterectomy)	-19900	Alive	TUMOR FREE	829								Negative		0	829	0	829	0	829	0	829
TCGA-BH-A0HY-01	TCGA-BH-A0HY	BRCA	60	FEMALE	WHITE	Stage I		Infiltrating Ductal Carcinoma		2009	Post (prior bilateral ovariectomy OR >12 mo since LMP with no prior hysterectomy)	-22179	Alive	TUMOR FREE	1545								Negative		0	1545	0	1545	0	1545	0	1545
TCGA-BH-A0RX-01	TCGA-BH-A0RX	BRCA	59	FEMALE	WHITE	Stage IIA		Infiltrating Ductal Carcinoma		2010	Post (prior bilateral ovariectomy OR >12 mo since LMP with no prior hysterectomy)	-21857	Alive	TUMOR FREE	170								Negative		0	170	0	170	0	170	0	170
TCGA-BH-A0W3-01	TCGA-BH-A0W3	BRCA	58	FEMALE	WHITE	Stage IIA		Infiltrating Ductal Carcinoma		2010	Indeterminate (neither Pre or Postmenopausal)	-21369	Alive	TUMOR FREE	728										0	728	0	728			0	728
TCGA-BH-A0W4-01	TCGA-BH-A0W4	BRCA	46	FEMALE	WHITE	Stage IIA		Infiltrating Ductal Carcinoma		2010		-16911	Alive	TUMOR FREE	759										0	759	0	759			0	759
TCGA-BH-A0W5-01	TCGA-BH-A0W5	BRCA	77	FEMALE	WHITE	Stage IIA		Infiltrating Ductal Carcinoma		2008		-28304	Alive	TUMOR FREE	1288								Negative		0	1288	0	1288	0	1288	0	1288
TCGA-BH-A0W7-01	TCGA-BH-A0W7	BRCA	49	FEMALE	WHITE	Stage I		Infiltrating Ductal Carcinoma		2008		-17996	Alive	TUMOR FREE	1363								Negative		0	1363	0	1363	0	1363	0	1363
TCGA-BH-A0WA-01	TCGA-BH-A0WA	BRCA	82	FEMALE	WHITE	Stage I				2008		-30025	Alive	TUMOR FREE	701								Negative		0	701	0	701	0	701	0	701
TCGA-BH-A18F-01	TCGA-BH-A18F	BRCA	50	FEMALE	WHITE	Stage IIA		Infiltrating Ductal Carcinoma		2010	Peri (6-12 months since last menstrual period)	-18594	Alive	TUMOR FREE	1001								Negative		0	1001	0	1001	0	1001	0	1001
TCGA-BH-A18F-11	TCGA-BH-A18F	BRCA	50	FEMALE	WHITE	Stage IIA		Infiltrating Ductal Carcinoma		2010	Peri (6-12 months since last menstrual period)	-18594	Alive	TUMOR FREE	1001								Negative		0	1001	0	1001	0	1001	0	1001
TCGA-BH-A18G-01	TCGA-BH-A18G	BRCA	81	FEMALE	WHITE	Stage IA		Infiltrating Ductal Carcinoma		2010	Post (prior bilateral ovariectomy OR >12 mo since LMP with no prior hysterectomy)	-29820	Alive	TUMOR FREE	149								Negative		0	149	0	149	0	149	0	149
TCGA-BH-A18H-01	TCGA-BH-A18H	BRCA	63	FEMALE	WHITE	Stage IA		Infiltrating Ductal Carcinoma		2010	Post (prior bilateral ovariectomy OR >12 mo since LMP with no prior hysterectomy)	-23065	Alive	TUMOR FREE	652								Negative		0	652	0	652	0	652	0	652
TCGA-BH-A18I-01	TCGA-BH-A18I	BRCA	53	FEMALE	WHITE	Stage IIA		Infiltrating Ductal Carcinoma		2010	Post (prior bilateral ovariectomy OR >12 mo since LMP with no prior hysterectomy)	-19489	Alive	TUMOR FREE	1093								Negative		0	1093	0	1093	0	1093	0	1093
TCGA-BH-A18J-01	TCGA-BH-A18J	BRCA	56	FEMALE	WHITE	Stage IV		Infiltrating Ductal Carcinoma		2000		-20678	Dead	WITH TUMOR		612							Negative		1	612	1	612			1	612
TCGA-BH-A18J-11	TCGA-BH-A18J	BRCA	56	FEMALE	WHITE	Stage IV		Infiltrating Ductal Carcinoma		2000		-20678	Dead	WITH TUMOR		612							Negative		1	612	1	612			1	612
TCGA-BH-A18K-01	TCGA-BH-A18K	BRCA	46	FEMALE	WHITE	Stage I		Infiltrating Ductal Carcinoma		1999		-16824	Dead	WITH TUMOR		2763							Negative		1	2763	1	2763			1	2763
TCGA-BH-A18K-11	TCGA-BH-A18K	BRCA	46	FEMALE	WHITE	Stage I		Infiltrating Ductal Carcinoma		1999		-16824	Dead	WITH TUMOR		2763							Negative		1	2763	1	2763			1	2763
TCGA-BH-A18L-01	TCGA-BH-A18L	BRCA	50	FEMALE	WHITE	Stage IIIA		Infiltrating Ductal Carcinoma		2003		-18519	Dead			811							Negative		1	811		811	0	811	0	811
TCGA-BH-A18L-11	TCGA-BH-A18L	BRCA	50	FEMALE	WHITE	Stage IIIA		Infiltrating Ductal Carcinoma		2003		-18519	Dead			811							Negative		1	811		811	0	811	0	811
TCGA-BH-A18M-01	TCGA-BH-A18M	BRCA	39	FEMALE	WHITE	Stage IIIA		Infiltrating Ductal Carcinoma		2001		-14532	Dead			2207							Negative		1	2207		2207	0	2207	0	2207
TCGA-BH-A18M-11	TCGA-BH-A18M	BRCA	39	FEMALE	WHITE	Stage IIIA		Infiltrating Ductal Carcinoma		2001		-14532	Dead			2207							Negative		1	2207		2207	0	2207	0	2207
TCGA-BH-A18N-01	TCGA-BH-A18N	BRCA	88	FEMALE	WHITE	Stage IIA		Infiltrating Ductal Carcinoma		2001		-32404	Dead			1148							Negative		1	1148		1148	0	1148	0	1148
TCGA-BH-A18N-11	TCGA-BH-A18N	BRCA	88	FEMALE	WHITE	Stage IIA		Infiltrating Ductal Carcinoma		2001		-32404	Dead			1148							Negative		1	1148		1148	0	1148	0	1148
TCGA-BH-A18P-01	TCGA-BH-A18P	BRCA	60	FEMALE	WHITE	Stage I		Infiltrating Ductal Carcinoma		2003		-22222	Dead	WITH TUMOR		921							Negative		1	921	1	921			1	921
TCGA-BH-A18P-11	TCGA-BH-A18P	BRCA	60	FEMALE	WHITE	Stage I		Infiltrating Ductal Carcinoma		2003		-22222	Dead	WITH TUMOR		921							Negative		1	921	1	921			1	921
TCGA-BH-A18Q-01	TCGA-BH-A18Q	BRCA	56	FEMALE	WHITE	Stage IIB		Infiltrating Ductal Carcinoma		2001		-20675	Dead			1692							Negative		1	1692		1692	0	1692	0	1692
TCGA-BH-A18Q-11	TCGA-BH-A18Q	BRCA	56	FEMALE	WHITE	Stage IIB		Infiltrating Ductal Carcinoma		2001		-20675	Dead			1692							Negative		1	1692		1692	0	1692	0	1692
TCGA-BH-A18R-01	TCGA-BH-A18R	BRCA	50	FEMALE	WHITE	Stage IIA		Infiltrating Ductal Carcinoma		2001		-18524	Dead	TUMOR FREE		1142							Negative		1	1142	0	1142	0	1142	0	1142
TCGA-BH-A18R-11	TCGA-BH-A18R	BRCA	50	FEMALE	WHITE	Stage IIA		Infiltrating Ductal Carcinoma		2001		-18524	Dead	TUMOR FREE		1142							Negative		1	1142	0	1142	0	1142	0	1142
TCGA-BH-A18S-01	TCGA-BH-A18S	BRCA	79	FEMALE	WHITE	Stage I		Mucinous Carcinoma		2003	Post (prior bilateral ovariectomy OR >12 mo since LMP with no prior hysterectomy)	-28974	Dead	TUMOR FREE		2009							Negative		1	2009	0	2009	0	2009	0	2009
TCGA-BH-A18S-11	TCGA-BH-A18S	BRCA	79	FEMALE	WHITE	Stage I		Mucinous Carcinoma		2003	Post (prior bilateral ovariectomy OR >12 mo since LMP with no prior hysterectomy)	-28974	Dead	TUMOR FREE		2009							Negative		1	2009	0	2009	0	2009	0	2009
TCGA-BH-A18T-01	TCGA-BH-A18T	BRCA	70	FEMALE	WHITE	Stage IIA		Infiltrating Ductal Carcinoma		2003	Post (prior bilateral ovariectomy OR >12 mo since LMP with no prior hysterectomy)	-25674	Dead	WITH TUMOR		224							Negative		1	224	1	224			1	224
TCGA-BH-A18U-01	TCGA-BH-A18U	BRCA	72	FEMALE	WHITE	Stage IIIA		Infiltrating Ductal Carcinoma		2003	Post (prior bilateral ovariectomy OR >12 mo since LMP with no prior hysterectomy)	-26426	Dead	TUMOR FREE		1563							Negative		1	1563	0	1563	0	1563	0	1563
TCGA-BH-A18U-11	TCGA-BH-A18U	BRCA	72	FEMALE	WHITE	Stage IIIA		Infiltrating Ductal Carcinoma		2003	Post (prior bilateral ovariectomy OR >12 mo since LMP with no prior hysterectomy)	-26426	Dead	TUMOR FREE		1563							Negative		1	1563	0	1563	0	1563	0	1563
TCGA-BH-A18V-06	TCGA-BH-A18V	BRCA	48	FEMALE	WHITE	Stage IIB		Infiltrating Ductal Carcinoma		2001		-17682	Dead			1556							Negative		1	1556		1556	0	1556	0	1556
TCGA-BH-A18V-01	TCGA-BH-A18V	BRCA	48	FEMALE	WHITE	Stage IIB		Infiltrating Ductal Carcinoma		2001		-17682	Dead			1556							Negative		1	1556		1556	0	1556	0	1556
TCGA-BH-A18V-11	TCGA-BH-A18V	BRCA	48	FEMALE	WHITE	Stage IIB		Infiltrating Ductal Carcinoma		2001		-17682	Dead			1556							Negative		1	1556		1556	0	1556	0	1556
TCGA-BH-A1EN-01	TCGA-BH-A1EN	BRCA	78	FEMALE	WHITE	Stage IIA		Infiltrating Ductal Carcinoma		1999	Post (prior bilateral ovariectomy OR >12 mo since LMP with no prior hysterectomy)	-28724	Dead	TUMOR FREE		2127							Negative		1	2127	0	2127	0	2127	0	2127
TCGA-BH-A1EN-11	TCGA-BH-A1EN	BRCA	78	FEMALE	WHITE	Stage IIA		Infiltrating Ductal Carcinoma		1999	Post (prior bilateral ovariectomy OR >12 mo since LMP with no prior hysterectomy)	-28724	Dead	TUMOR FREE		2127							Negative		1	2127	0	2127	0	2127	0	2127
TCGA-BH-A1EO-01	TCGA-BH-A1EO	BRCA	68	FEMALE	WHITE	Stage IIA		Mixed Histology (please specify)		1999	Post (prior bilateral ovariectomy OR >12 mo since LMP with no prior hysterectomy)	-25136	Dead	TUMOR FREE		2798									1	2798	0	2798			0	2798
TCGA-BH-A1EO-11	TCGA-BH-A1EO	BRCA	68	FEMALE	WHITE	Stage IIA		Mixed Histology (please specify)		1999	Post (prior bilateral ovariectomy OR >12 mo since LMP with no prior hysterectomy)	-25136	Dead	TUMOR FREE		2798									1	2798	0	2798			0	2798
TCGA-BH-A1ES-06	TCGA-BH-A1ES	BRCA	35	FEMALE	WHITE	Stage IIB		Infiltrating Ductal Carcinoma		1999	Pre (<6 months since LMP AND no prior bilateral ovariectomy AND not on estrogen replacement)	-13138	Dead	WITH TUMOR		3462									1	3462	1	3462			1	3462
TCGA-BH-A1ES-01	TCGA-BH-A1ES	BRCA	35	FEMALE	WHITE	Stage IIB		Infiltrating Ductal Carcinoma		1999	Pre (<6 months since LMP AND no prior bilateral ovariectomy AND not on estrogen replacement)	-13138	Dead	WITH TUMOR		3462									1	3462	1	3462			1	3462
TCGA-BH-A1ES-11	TCGA-BH-A1ES	BRCA	35	FEMALE	WHITE	Stage IIB		Infiltrating Ductal Carcinoma		1999	Pre (<6 months since LMP AND no prior bilateral ovariectomy AND not on estrogen replacement)	-13138	Dead	WITH TUMOR		3462									1	3462	1	3462			1	3462
TCGA-BH-A1ET-01	TCGA-BH-A1ET	BRCA	55	FEMALE	WHITE	Stage I		Infiltrating Ductal Carcinoma		1999		-20425	Dead	TUMOR FREE		2520									1	2520	0	2520			0	2520
TCGA-BH-A1ET-11	TCGA-BH-A1ET	BRCA	55	FEMALE	WHITE	Stage I		Infiltrating Ductal Carcinoma		1999		-20425	Dead	TUMOR FREE		2520									1	2520	0	2520			0	2520
TCGA-BH-A1EU-01	TCGA-BH-A1EU	BRCA	83	FEMALE	WHITE	Stage I		Infiltrating Ductal Carcinoma		1999	Post (prior bilateral ovariectomy OR >12 mo since LMP with no prior hysterectomy)	-30339	Dead	TUMOR FREE		1286									1	1286	0	1286			0	1286
TCGA-BH-A1EU-11	TCGA-BH-A1EU	BRCA	83	FEMALE	WHITE	Stage I		Infiltrating Ductal Carcinoma		1999	Post (prior bilateral ovariectomy OR >12 mo since LMP with no prior hysterectomy)	-30339	Dead	TUMOR FREE		1286									1	1286	0	1286			0	1286
TCGA-BH-A1EV-01	TCGA-BH-A1EV	BRCA	45	FEMALE	WHITE	Stage IIIA		Infiltrating Ductal Carcinoma		1999		-16504	Dead	WITH TUMOR		365									1	365	1	365			1	365
TCGA-BH-A1EV-11	TCGA-BH-A1EV	BRCA	45	FEMALE	WHITE	Stage IIIA		Infiltrating Ductal Carcinoma		1999		-16504	Dead	WITH TUMOR		365									1	365	1	365			1	365
TCGA-BH-A1EW-01	TCGA-BH-A1EW	BRCA	38	FEMALE	WHITE	Stage IIA		Infiltrating Ductal Carcinoma		1999	Pre (<6 months since LMP AND no prior bilateral ovariectomy AND not on estrogen replacement)	-14090	Dead	WITH TUMOR		1694									1	1694	1	1694			1	1694
TCGA-BH-A1EW-11	TCGA-BH-A1EW	BRCA	38	FEMALE	WHITE	Stage IIA		Infiltrating Ductal Carcinoma		1999	Pre (<6 months since LMP AND no prior bilateral ovariectomy AND not on estrogen replacement)	-14090	Dead	WITH TUMOR		1694									1	1694	1	1694			1	1694
TCGA-BH-A1EX-01	TCGA-BH-A1EX	BRCA	67	FEMALE	WHITE	Stage IIB		Infiltrating Ductal Carcinoma		2000	Post (prior bilateral ovariectomy OR >12 mo since LMP with no prior hysterectomy)	-24544	Dead	WITH TUMOR		1508									1	1508	1	1508			1	1508
TCGA-BH-A1EY-01	TCGA-BH-A1EY	BRCA	79	FEMALE	WHITE	Stage IIA		Infiltrating Ductal Carcinoma		2000	Post (prior bilateral ovariectomy OR >12 mo since LMP with no prior hysterectomy)	-28940	Dead	WITH TUMOR		538		Distant Metastasis	Lung	Liver	396				1	538	1	538			1	396
TCGA-BH-A1EY-11	TCGA-BH-A1EY	BRCA	79	FEMALE	WHITE	Stage IIA		Infiltrating Ductal Carcinoma		2000	Post (prior bilateral ovariectomy OR >12 mo since LMP with no prior hysterectomy)	-28940	Dead	WITH TUMOR		538		Distant Metastasis	Lung	Liver	396				1	538	1	538			1	396
TCGA-BH-A1F0-01	TCGA-BH-A1F0	BRCA	80	FEMALE	WHITE	Stage IIA		Infiltrating Ductal Carcinoma		2000	Post (prior bilateral ovariectomy OR >12 mo since LMP with no prior hysterectomy)	-29335	Dead	WITH TUMOR		785									1	785	1	785			1	785
TCGA-BH-A1F0-11	TCGA-BH-A1F0	BRCA	80	FEMALE	WHITE	Stage IIA		Infiltrating Ductal Carcinoma		2000	Post (prior bilateral ovariectomy OR >12 mo since LMP with no prior hysterectomy)	-29335	Dead	WITH TUMOR		785									1	785	1	785			1	785
TCGA-BH-A1F2-01	TCGA-BH-A1F2	BRCA	53	FEMALE	WHITE	Stage IIIB		Infiltrating Ductal Carcinoma		1999		-19701	Dead	TUMOR FREE		959									1	959	0	959			0	959
TCGA-BH-A1F2-11	TCGA-BH-A1F2	BRCA	53	FEMALE	WHITE	Stage IIIB		Infiltrating Ductal Carcinoma		1999		-19701	Dead	TUMOR FREE		959									1	959	0	959			0	959
TCGA-BH-A1F5-01	TCGA-BH-A1F5	BRCA	62	FEMALE	WHITE	Stage IIA		Infiltrating Ductal Carcinoma		2002		-22842	Dead	TUMOR FREE		2712									1	2712	0	2712			0	2712
TCGA-BH-A1F5-11	TCGA-BH-A1F5	BRCA	62	FEMALE	WHITE	Stage IIA		Infiltrating Ductal Carcinoma		2002		-22842	Dead	TUMOR FREE		2712									1	2712	0	2712			0	2712
TCGA-BH-A1F6-01	TCGA-BH-A1F6	BRCA	51	FEMALE	WHITE			Infiltrating Ductal Carcinoma		1996		-18691	Dead			2965									1	2965		2965			0	2965
TCGA-BH-A1F6-11	TCGA-BH-A1F6	BRCA	51	FEMALE	WHITE			Infiltrating Ductal Carcinoma		1996		-18691	Dead			2965									1	2965		2965			0	2965
TCGA-BH-A1F8-01	TCGA-BH-A1F8	BRCA	90	FEMALE	WHITE	Stage IIIB		Infiltrating Ductal Carcinoma		1999	Post (prior bilateral ovariectomy OR >12 mo since LMP with no prior hysterectomy)	-32871	Dead	WITH TUMOR		763									1	763	1	763			1	763
TCGA-BH-A1F8-11	TCGA-BH-A1F8	BRCA	90	FEMALE	WHITE	Stage IIIB		Infiltrating Ductal Carcinoma		1999	Post (prior bilateral ovariectomy OR >12 mo since LMP with no prior hysterectomy)	-32871	Dead	WITH TUMOR		763									1	763	1	763			1	763
TCGA-BH-A1FB-01	TCGA-BH-A1FB	BRCA	60	FEMALE	WHITE	Stage IIB		Infiltrating Ductal Carcinoma		2000	Post (prior bilateral ovariectomy OR >12 mo since LMP with no prior hysterectomy)	-21933	Dead	WITH TUMOR		3669									1	3669	1	3669			1	3669
TCGA-BH-A1FB-11	TCGA-BH-A1FB	BRCA	60	FEMALE	WHITE	Stage IIB		Infiltrating Ductal Carcinoma		2000	Post (prior bilateral ovariectomy OR >12 mo since LMP with no prior hysterectomy)	-21933	Dead	WITH TUMOR		3669									1	3669	1	3669			1	3669
TCGA-BH-A1FC-01	TCGA-BH-A1FC	BRCA	78	FEMALE	BLACK OR AFRICAN AMERICAN	Stage IIA		Medullary Carcinoma		1998	Post (prior bilateral ovariectomy OR >12 mo since LMP with no prior hysterectomy)	-28706	Dead	TUMOR FREE		3472									1	3472	0	3472			0	3472
TCGA-BH-A1FC-11	TCGA-BH-A1FC	BRCA	78	FEMALE	BLACK OR AFRICAN AMERICAN	Stage IIA		Medullary Carcinoma		1998	Post (prior bilateral ovariectomy OR >12 mo since LMP with no prior hysterectomy)	-28706	Dead	TUMOR FREE		3472									1	3472	0	3472			0	3472
TCGA-BH-A1FD-01	TCGA-BH-A1FD	BRCA	68	FEMALE	WHITE	Stage I		Infiltrating Ductal Carcinoma		1998	Post (prior bilateral ovariectomy OR >12 mo since LMP with no prior hysterectomy)	-24940	Dead	WITH TUMOR		1009									1	1009	1	1009			1	1009
TCGA-BH-A1FD-11	TCGA-BH-A1FD	BRCA	68	FEMALE	WHITE	Stage I		Infiltrating Ductal Carcinoma		1998	Post (prior bilateral ovariectomy OR >12 mo since LMP with no prior hysterectomy)	-24940	Dead	WITH TUMOR		1009									1	1009	1	1009			1	1009
TCGA-BH-A1FE-06	TCGA-BH-A1FE	BRCA	31	FEMALE	WHITE	Stage IIB		Infiltrating Ductal Carcinoma		1998		-11650	Dead	WITH TUMOR		2273									1	2273	1	2273			1	2273
TCGA-BH-A1FE-01	TCGA-BH-A1FE	BRCA	31	FEMALE	WHITE	Stage IIB		Infiltrating Ductal Carcinoma		1998		-11650	Dead	WITH TUMOR		2273									1	2273	1	2273			1	2273
TCGA-BH-A1FE-11	TCGA-BH-A1FE	BRCA	31	FEMALE	WHITE	Stage IIB		Infiltrating Ductal Carcinoma		1998		-11650	Dead	WITH TUMOR		2273									1	2273	1	2273			1	2273
TCGA-BH-A1FG-01	TCGA-BH-A1FG	BRCA	88	FEMALE	WHITE	Stage I		Infiltrating Ductal Carcinoma		1998	Post (prior bilateral ovariectomy OR >12 mo since LMP with no prior hysterectomy)	-32295	Dead			3736									1	3736		3736			0	3736
TCGA-BH-A1FG-11	TCGA-BH-A1FG	BRCA	88	FEMALE	WHITE	Stage I		Infiltrating Ductal Carcinoma		1998	Post (prior bilateral ovariectomy OR >12 mo since LMP with no prior hysterectomy)	-32295	Dead			3736									1	3736		3736			0	3736
TCGA-BH-A1FH-01	TCGA-BH-A1FH	BRCA	47	FEMALE	WHITE	Stage IV		Infiltrating Ductal Carcinoma		1998		-17172	Dead	WITH TUMOR		1034									1	1034	1	1034			1	1034
TCGA-BH-A1FH-11	TCGA-BH-A1FH	BRCA	47	FEMALE	WHITE	Stage IV		Infiltrating Ductal Carcinoma		1998		-17172	Dead	WITH TUMOR		1034									1	1034	1	1034			1	1034
TCGA-BH-A1FJ-01	TCGA-BH-A1FJ	BRCA	66	FEMALE	WHITE	Stage IIIA		Infiltrating Ductal Carcinoma		1998		-24262	Dead			1927									1	1927		1927			0	1927
TCGA-BH-A1FJ-11	TCGA-BH-A1FJ	BRCA	66	FEMALE	WHITE	Stage IIIA		Infiltrating Ductal Carcinoma		1998		-24262	Dead			1927									1	1927		1927			0	1927
TCGA-BH-A1FL-01	TCGA-BH-A1FL	BRCA	69	FEMALE	WHITE	Stage IIB		Infiltrating Ductal Carcinoma		1998		-25558	Dead	WITH TUMOR		1673									1	1673	1	1673			1	1673
TCGA-BH-A1FM-01	TCGA-BH-A1FM	BRCA	44	FEMALE	WHITE	Stage IIIA		Infiltrating Ductal Carcinoma		1998		-16289	Dead			1388									1	1388		1388			0	1388
TCGA-BH-A1FM-11	TCGA-BH-A1FM	BRCA	44	FEMALE	WHITE	Stage IIIA		Infiltrating Ductal Carcinoma		1998		-16289	Dead			1388									1	1388		1388			0	1388
TCGA-BH-A1FN-01	TCGA-BH-A1FN	BRCA	34	FEMALE	WHITE	Stage IIA		Infiltrating Ductal Carcinoma		1997		-12525	Dead	WITH TUMOR		2192									1	2192	1	2192			1	2192
TCGA-BH-A1FN-11	TCGA-BH-A1FN	BRCA	34	FEMALE	WHITE	Stage IIA		Infiltrating Ductal Carcinoma		1997		-12525	Dead	WITH TUMOR		2192									1	2192	1	2192			1	2192
TCGA-BH-A1FR-01	TCGA-BH-A1FR	BRCA	73	FEMALE	WHITE	Stage IIIB		Other, specify		1997		-26684	Dead	WITH TUMOR		1642									1	1642	1	1642			1	1642
TCGA-BH-A1FR-11	TCGA-BH-A1FR	BRCA	73	FEMALE	WHITE	Stage IIIB		Other, specify		1997		-26684	Dead	WITH TUMOR		1642									1	1642	1	1642			1	1642
TCGA-BH-A1FU-01	TCGA-BH-A1FU	BRCA	44	FEMALE	WHITE	Stage IA		Infiltrating Ductal Carcinoma		1997		-16174	Dead	WITH TUMOR		1688									1	1688	1	1688			1	1688
TCGA-BH-A1FU-11	TCGA-BH-A1FU	BRCA	44	FEMALE	WHITE	Stage IA		Infiltrating Ductal Carcinoma		1997		-16174	Dead	WITH TUMOR		1688									1	1688	1	1688			1	1688
TCGA-BH-A201-01	TCGA-BH-A201	BRCA	64	FEMALE	WHITE	Stage IA		Infiltrating Ductal Carcinoma		2011	Post (prior bilateral ovariectomy OR >12 mo since LMP with no prior hysterectomy)	-23423	Alive	TUMOR FREE	856										0	856	0	856			0	856
TCGA-BH-A202-01	TCGA-BH-A202	BRCA	60	FEMALE	WHITE	Stage II		Infiltrating Ductal Carcinoma		2011	Post (prior bilateral ovariectomy OR >12 mo since LMP with no prior hysterectomy)	-22052	Alive	TUMOR FREE	795										0	795	0	795			0	795
TCGA-BH-A203-01	TCGA-BH-A203	BRCA	78	FEMALE	WHITE	Stage IIB		Infiltrating Ductal Carcinoma		1996	Post (prior bilateral ovariectomy OR >12 mo since LMP with no prior hysterectomy)	-28609	Dead	WITH TUMOR		1174									1	1174	1	1174			1	1174
TCGA-BH-A203-11	TCGA-BH-A203	BRCA	78	FEMALE	WHITE	Stage IIB		Infiltrating Ductal Carcinoma		1996	Post (prior bilateral ovariectomy OR >12 mo since LMP with no prior hysterectomy)	-28609	Dead	WITH TUMOR		1174									1	1174	1	1174			1	1174
TCGA-BH-A204-01	TCGA-BH-A204	BRCA	80	FEMALE	WHITE	Stage IIB		Infiltrating Ductal Carcinoma		1996	Post (prior bilateral ovariectomy OR >12 mo since LMP with no prior hysterectomy)	-29529	Dead			2534									1	2534		2534			0	2534
TCGA-BH-A204-11	TCGA-BH-A204	BRCA	80	FEMALE	WHITE	Stage IIB		Infiltrating Ductal Carcinoma		1996	Post (prior bilateral ovariectomy OR >12 mo since LMP with no prior hysterectomy)	-29529	Dead			2534									1	2534		2534			0	2534
TCGA-BH-A208-01	TCGA-BH-A208	BRCA	48	FEMALE	WHITE	Stage IIB		Infiltrating Ductal Carcinoma		1995		-17715	Dead	TUMOR FREE		1759									1	1759	0	1759			0	1759
TCGA-BH-A208-11	TCGA-BH-A208	BRCA	48	FEMALE	WHITE	Stage IIB		Infiltrating Ductal Carcinoma		1995		-17715	Dead	TUMOR FREE		1759									1	1759	0	1759			0	1759
TCGA-BH-A209-01	TCGA-BH-A209	BRCA	77	FEMALE	BLACK OR AFRICAN AMERICAN	Stage I		Medullary Carcinoma		1996	Post (prior bilateral ovariectomy OR >12 mo since LMP with no prior hysterectomy)	-28403	Dead	TUMOR FREE		3959									1	3959	0	3959			0	3959
TCGA-BH-A209-11	TCGA-BH-A209	BRCA	77	FEMALE	BLACK OR AFRICAN AMERICAN	Stage I		Medullary Carcinoma		1996	Post (prior bilateral ovariectomy OR >12 mo since LMP with no prior hysterectomy)	-28403	Dead	TUMOR FREE		3959									1	3959	0	3959			0	3959
TCGA-BH-A28O-01	TCGA-BH-A28O	BRCA	50	FEMALE	WHITE	Stage IIIC		Infiltrating Lobular Carcinoma		2010		-18501	Alive	TUMOR FREE	1120								Negative		0	1120	0	1120	0	1120	0	1120
TCGA-BH-A28Q-01	TCGA-BH-A28Q	BRCA	46	FEMALE	WHITE	Stage IIB		Infiltrating Lobular Carcinoma		2010	Pre (<6 months since LMP AND no prior bilateral ovariectomy AND not on estrogen replacement)	-16882	Alive	TUMOR FREE	1119										0	1119	0	1119			0	1119
TCGA-BH-A2L8-01	TCGA-BH-A2L8	BRCA	45	FEMALE	WHITE	Stage IIA		Infiltrating Lobular Carcinoma		2011	Pre (<6 months since LMP AND no prior bilateral ovariectomy AND not on estrogen replacement)	-16658	Alive	TUMOR FREE	612								Negative		0	612	0	612	0	612	0	612
TCGA-BH-A42T-01	TCGA-BH-A42T	BRCA	75	FEMALE	BLACK OR AFRICAN AMERICAN	Stage IIA		Infiltrating Lobular Carcinoma		2012	Post (prior bilateral ovariectomy OR >12 mo since LMP with no prior hysterectomy)	-27731	Dead	TUMOR FREE		320							Negative		1	320	0	320	0	320	0	320
TCGA-BH-A42U-01	TCGA-BH-A42U	BRCA	80	FEMALE	BLACK OR AFRICAN AMERICAN	Stage IIA		Infiltrating Lobular Carcinoma		2004	Post (prior bilateral ovariectomy OR >12 mo since LMP with no prior hysterectomy)	-29330	Alive	TUMOR FREE	3364								Negative		0	3364	0	3364	0	3364	0	3364
TCGA-BH-A42V-01	TCGA-BH-A42V	BRCA	41	FEMALE	BLACK OR AFRICAN AMERICAN	Stage IB		Infiltrating Ductal Carcinoma		2012	Pre (<6 months since LMP AND no prior bilateral ovariectomy AND not on estrogen replacement)	-15158	Alive	TUMOR FREE	635								Negative		0	635	0	635	0	635	0	635
TCGA-BH-A5IZ-01	TCGA-BH-A5IZ	BRCA	51	FEMALE	BLACK OR AFRICAN AMERICAN	Stage IIB		Infiltrating Ductal Carcinoma		2012	Post (prior bilateral ovariectomy OR >12 mo since LMP with no prior hysterectomy)	-18927	Alive	TUMOR FREE	567								Negative		0	567	0	567	0	567	0	567
TCGA-BH-A5J0-01	TCGA-BH-A5J0	BRCA	63	FEMALE	BLACK OR AFRICAN AMERICAN	Stage IA		Infiltrating Ductal Carcinoma		2012	Post (prior bilateral ovariectomy OR >12 mo since LMP with no prior hysterectomy)	-23072	Alive	TUMOR FREE	715								Negative		0	715	0	715	0	715	0	715
TCGA-BH-A6R8-01	TCGA-BH-A6R8	BRCA	46	FEMALE	BLACK OR AFRICAN AMERICAN	Stage IIA		Infiltrating Ductal Carcinoma		2012	[Unknown]	-16829	Alive	TUMOR FREE	293								Negative		0	293	0	293	0	293	0	293
TCGA-BH-A6R9-01	TCGA-BH-A6R9	BRCA	61	FEMALE	WHITE	Stage IIA		Metaplastic Carcinoma		2012	Post (prior bilateral ovariectomy OR >12 mo since LMP with no prior hysterectomy)	-22325	Alive	TUMOR FREE	160								Negative		0	160	0	160	0	160	0	160
TCGA-BH-A8FY-01	TCGA-BH-A8FY	BRCA	87	FEMALE	WHITE	Stage IA		Infiltrating Lobular Carcinoma		2012	Post (prior bilateral ovariectomy OR >12 mo since LMP with no prior hysterectomy)	-31932	Dead	TUMOR FREE		295							Negative		1	295	0	295	0	295	0	295
TCGA-BH-A8FZ-01	TCGA-BH-A8FZ	BRCA	58	FEMALE	WHITE	Stage IA		Infiltrating Lobular Carcinoma		2012	Post (prior bilateral ovariectomy OR >12 mo since LMP with no prior hysterectomy)	-21343	Alive	TUMOR FREE	574								Negative		0	574	0	574	0	574	0	574
TCGA-BH-A8G0-01	TCGA-BH-A8G0	BRCA	54	FEMALE	WHITE	Stage IIB		Infiltrating Lobular Carcinoma		2012	Peri (6-12 months since last menstrual period)	-19975	Alive	TUMOR FREE	662								Negative		0	662	0	662	0	662	0	662
TCGA-BH-AB28-01	TCGA-BH-AB28	BRCA	53	FEMALE	WHITE	Stage IIIA		Infiltrating Lobular Carcinoma		2013	[Unknown]	-19570	Alive	TUMOR FREE	287								Negative		0	287	0	287	0	287	0	287
TCGA-C8-A12K-01	TCGA-C8-A12K	BRCA	80	FEMALE	ASIAN	Stage IIB		Infiltrating Ductal Carcinoma		2010	Post (prior bilateral ovariectomy OR >12 mo since LMP with no prior hysterectomy)	-29463	Alive	TUMOR FREE	0								Negative		0	0	0	0	0	0	0	0
TCGA-C8-A12L-01	TCGA-C8-A12L	BRCA	67	FEMALE	ASIAN	Stage IIA		Infiltrating Ductal Carcinoma		2010	Post (prior bilateral ovariectomy OR >12 mo since LMP with no prior hysterectomy)	-24710	Alive	TUMOR FREE	363								Negative		0	363	0	363	0	363	0	363
TCGA-C8-A12M-01	TCGA-C8-A12M	BRCA	70	FEMALE	ASIAN	Stage IIA		Infiltrating Ductal Carcinoma		2010	Post (prior bilateral ovariectomy OR >12 mo since LMP with no prior hysterectomy)	-25811	Alive	TUMOR FREE	358								Negative		0	358	0	358	0	358	0	358
TCGA-C8-A12N-01	TCGA-C8-A12N	BRCA	58	FEMALE	ASIAN	Stage IIA		Infiltrating Ductal Carcinoma		2010	Post (prior bilateral ovariectomy OR >12 mo since LMP with no prior hysterectomy)	-21428	Alive	TUMOR FREE	358								Negative		0	358	0	358	0	358	0	358
TCGA-C8-A12O-01	TCGA-C8-A12O	BRCA	50	FEMALE	ASIAN	Stage IIA		Infiltrating Ductal Carcinoma		2010	Pre (<6 months since LMP AND no prior bilateral ovariectomy AND not on estrogen replacement)	-18506	Alive	TUMOR FREE	385								Negative		0	385	0	385	0	385	0	385
TCGA-C8-A12P-01	TCGA-C8-A12P	BRCA	55	FEMALE	ASIAN	Stage IIB		Infiltrating Ductal Carcinoma		2010	Post (prior bilateral ovariectomy OR >12 mo since LMP with no prior hysterectomy)	-20332	Alive	TUMOR FREE	358								Negative		0	358	0	358	0	358	0	358
TCGA-C8-A12Q-01	TCGA-C8-A12Q	BRCA	78	FEMALE	ASIAN	Stage IIIA		Infiltrating Ductal Carcinoma		2010	Post (prior bilateral ovariectomy OR >12 mo since LMP with no prior hysterectomy)	-28733	Dead	WITH TUMOR		385							Negative		1	385	1	385			1	385
TCGA-C8-A12T-01	TCGA-C8-A12T	BRCA	43	FEMALE	ASIAN	Stage IIA		Infiltrating Ductal Carcinoma		2010	Pre (<6 months since LMP AND no prior bilateral ovariectomy AND not on estrogen replacement)		Alive	TUMOR FREE	0								Negative		0	0	0	0	0	0	0	0
TCGA-C8-A12U-01	TCGA-C8-A12U	BRCA	46	FEMALE	ASIAN	Stage IIB		Infiltrating Ductal Carcinoma		2010	Pre (<6 months since LMP AND no prior bilateral ovariectomy AND not on estrogen replacement)	-17045	Alive	TUMOR FREE	385								Negative		0	385	0	385	0	385	0	385
TCGA-C8-A12V-01	TCGA-C8-A12V	BRCA	55	FEMALE	ASIAN	Stage IIA		Infiltrating Ductal Carcinoma		2010	Post (prior bilateral ovariectomy OR >12 mo since LMP with no prior hysterectomy)	-20346	Alive	TUMOR FREE	385										0	385	0	385			0	385
TCGA-C8-A12W-01	TCGA-C8-A12W	BRCA	49	FEMALE	ASIAN	Stage IIIB		Infiltrating Ductal Carcinoma		2010	Pre (<6 months since LMP AND no prior bilateral ovariectomy AND not on estrogen replacement)	-18140	Alive	TUMOR FREE	385								Negative		0	385	0	385	0	385	0	385
TCGA-C8-A12X-01	TCGA-C8-A12X	BRCA	62	FEMALE	ASIAN	Stage IIB		Mucinous Carcinoma		2010	Post (prior bilateral ovariectomy OR >12 mo since LMP with no prior hysterectomy)	-22889	Alive	TUMOR FREE	385								Negative		0	385	0	385	0	385	0	385
TCGA-C8-A12Y-01	TCGA-C8-A12Y	BRCA	44	FEMALE	ASIAN	Stage IIB		Infiltrating Ductal Carcinoma		2010	Pre (<6 months since LMP AND no prior bilateral ovariectomy AND not on estrogen replacement)		Alive	TUMOR FREE	1476								Negative		0	1476	0	1476	0	1476	0	1476
TCGA-C8-A12Z-01	TCGA-C8-A12Z	BRCA	45	FEMALE	ASIAN	Stage IIB		Infiltrating Ductal Carcinoma		2010	Peri (6-12 months since last menstrual period)	-16508	Alive	TUMOR FREE	382								Negative		0	382	0	382	0	382	0	382
TCGA-C8-A130-01	TCGA-C8-A130	BRCA	52	FEMALE	ASIAN	Stage IIIA		Infiltrating Ductal Carcinoma		2010	Peri (6-12 months since last menstrual period)	-19117	Alive	TUMOR FREE	370								Negative		0	370	0	370	0	370	0	370
TCGA-C8-A131-01	TCGA-C8-A131	BRCA	82	FEMALE	ASIAN	Stage IIIA		Infiltrating Ductal Carcinoma		2010	Post (prior bilateral ovariectomy OR >12 mo since LMP with no prior hysterectomy)	-29966	Alive	TUMOR FREE	411								Negative		0	411	0	411	0	411	0	411
TCGA-C8-A132-01	TCGA-C8-A132	BRCA	56	FEMALE	ASIAN	Stage IIB		Infiltrating Ductal Carcinoma		2010	Post (prior bilateral ovariectomy OR >12 mo since LMP with no prior hysterectomy)	-20471	Alive	TUMOR FREE	383								Negative		0	383	0	383	0	383	0	383
TCGA-C8-A133-01	TCGA-C8-A133	BRCA	65	FEMALE	WHITE	Stage IIIA		Other, specify		2010	Post (prior bilateral ovariectomy OR >12 mo since LMP with no prior hysterectomy)	-23922	Alive	TUMOR FREE	0								Negative		0	0	0	0	0	0	0	0
TCGA-C8-A134-01	TCGA-C8-A134	BRCA	52	FEMALE	ASIAN	Stage IIA		Infiltrating Ductal Carcinoma		2010	Peri (6-12 months since last menstrual period)	-19010	Alive	TUMOR FREE	383								Negative		0	383	0	383	0	383	0	383
TCGA-C8-A135-01	TCGA-C8-A135	BRCA	64	FEMALE	ASIAN	Stage IIB		Infiltrating Ductal Carcinoma		2010	Post (prior bilateral ovariectomy OR >12 mo since LMP with no prior hysterectomy)	-23667	Alive	TUMOR FREE	393								Negative		0	393	0	393	0	393	0	393
TCGA-C8-A137-01	TCGA-C8-A137	BRCA	34	FEMALE	ASIAN	Stage IIB		Infiltrating Ductal Carcinoma		2010	Pre (<6 months since LMP AND no prior bilateral ovariectomy AND not on estrogen replacement)	-12729	Alive	WITH TUMOR	379			Locoregional Recurrence			136		Negative		0	379	0	379	1	136	1	136
TCGA-C8-A138-01	TCGA-C8-A138	BRCA	54	FEMALE	ASIAN	Stage IIIA		Infiltrating Ductal Carcinoma		2010	Post (prior bilateral ovariectomy OR >12 mo since LMP with no prior hysterectomy)	-20053	Alive	TUMOR FREE	380								Negative		0	380	0	380	0	380	0	380
TCGA-C8-A1HE-01	TCGA-C8-A1HE	BRCA	59	FEMALE	ASIAN	Stage IIA		Infiltrating Ductal Carcinoma		2010	Post (prior bilateral ovariectomy OR >12 mo since LMP with no prior hysterectomy)		Alive	TUMOR FREE	375								Negative		0	375	0	375	0	375	0	375
TCGA-C8-A1HF-01	TCGA-C8-A1HF	BRCA	48	FEMALE	ASIAN	Stage IIA		Infiltrating Ductal Carcinoma		2010	Pre (<6 months since LMP AND no prior bilateral ovariectomy AND not on estrogen replacement)		Alive	TUMOR FREE	332								Negative		0	332	0	332	0	332	0	332
TCGA-C8-A1HG-01	TCGA-C8-A1HG	BRCA	50	FEMALE	ASIAN	Stage IIA		Infiltrating Ductal Carcinoma		2010	Pre (<6 months since LMP AND no prior bilateral ovariectomy AND not on estrogen replacement)		Alive	TUMOR FREE	345								Negative		0	345	0	345	0	345	0	345
TCGA-C8-A1HI-01	TCGA-C8-A1HI	BRCA	40	FEMALE	ASIAN	Stage IIIA		Infiltrating Ductal Carcinoma		2010	Pre (<6 months since LMP AND no prior bilateral ovariectomy AND not on estrogen replacement)		Alive	TUMOR FREE	343								Negative		0	343	0	343	0	343	0	343
TCGA-C8-A1HJ-01	TCGA-C8-A1HJ	BRCA	53	FEMALE	ASIAN	Stage IIA		Infiltrating Ductal Carcinoma		2010	Peri (6-12 months since last menstrual period)	-19629	Alive	TUMOR FREE	5								Negative		0	5	0	5	0	5	0	5
TCGA-C8-A1HK-01	TCGA-C8-A1HK	BRCA	53	FEMALE	ASIAN	Stage IIB		Infiltrating Ductal Carcinoma		2010	Peri (6-12 months since last menstrual period)		Alive	TUMOR FREE	366								Negative		0	366	0	366	0	366	0	366
TCGA-C8-A1HL-01	TCGA-C8-A1HL	BRCA	38	FEMALE	ASIAN	Stage IIIA		Other, specify		2010	Pre (<6 months since LMP AND no prior bilateral ovariectomy AND not on estrogen replacement)		Alive	TUMOR FREE	317								Negative		0	317	0	317	0	317	0	317
TCGA-C8-A1HM-01	TCGA-C8-A1HM	BRCA	74	FEMALE	ASIAN	Stage IIA		Infiltrating Ductal Carcinoma		2010	Post (prior bilateral ovariectomy OR >12 mo since LMP with no prior hysterectomy)	-27063	Alive	TUMOR FREE	375								Negative		0	375	0	375	0	375	0	375
TCGA-C8-A1HN-01	TCGA-C8-A1HN	BRCA	56	FEMALE	ASIAN	Stage IIA		Infiltrating Ductal Carcinoma		2010	Post (prior bilateral ovariectomy OR >12 mo since LMP with no prior hysterectomy)	-20712	Alive	TUMOR FREE	394								Negative		0	394	0	394	0	394	0	394
TCGA-C8-A1HO-01	TCGA-C8-A1HO	BRCA	34	FEMALE	ASIAN	Stage IIIC		Infiltrating Ductal Carcinoma		2010	Pre (<6 months since LMP AND no prior bilateral ovariectomy AND not on estrogen replacement)	-12715	Alive	TUMOR FREE	375								Negative		0	375	0	375	0	375	0	375
TCGA-C8-A26V-01	TCGA-C8-A26V	BRCA	47	FEMALE	ASIAN	Stage IIIA		Infiltrating Ductal Carcinoma		2010	Peri (6-12 months since last menstrual period)	-17468	Alive	TUMOR FREE	616								Negative		0	616	0	616	0	616	0	616
TCGA-C8-A26W-01	TCGA-C8-A26W	BRCA	58	FEMALE	ASIAN	Stage IIB		Infiltrating Ductal Carcinoma		2010	Post (prior bilateral ovariectomy OR >12 mo since LMP with no prior hysterectomy)	-21391	Alive	TUMOR FREE	381								Negative		0	381	0	381	0	381	0	381
TCGA-C8-A26X-01	TCGA-C8-A26X	BRCA	58	FEMALE	ASIAN	Stage IIA		Infiltrating Ductal Carcinoma		2010	Post (prior bilateral ovariectomy OR >12 mo since LMP with no prior hysterectomy)	-21463	Alive	TUMOR FREE	376								Negative		0	376	0	376	0	376	0	376
TCGA-C8-A26Y-01	TCGA-C8-A26Y	BRCA	90	FEMALE	ASIAN	Stage IIA		Infiltrating Ductal Carcinoma		2010	Post (prior bilateral ovariectomy OR >12 mo since LMP with no prior hysterectomy)	-32872	Alive	TUMOR FREE	394								Negative		0	394	0	394	0	394	0	394
TCGA-C8-A26Z-01	TCGA-C8-A26Z	BRCA	59	FEMALE	ASIAN	Stage IIA		Infiltrating Ductal Carcinoma		2010	Post (prior bilateral ovariectomy OR >12 mo since LMP with no prior hysterectomy)		Alive	TUMOR FREE	470								Negative		0	470	0	470	0	470	0	470
TCGA-C8-A273-01	TCGA-C8-A273	BRCA	29	FEMALE	ASIAN	Stage IIB		Infiltrating Ductal Carcinoma		2010	Pre (<6 months since LMP AND no prior bilateral ovariectomy AND not on estrogen replacement)		Alive	TUMOR FREE	513								Negative		0	513	0	513	0	513	0	513
TCGA-C8-A274-01	TCGA-C8-A274	BRCA	63	FEMALE	ASIAN	Stage IIA		Infiltrating Ductal Carcinoma		2010	Post (prior bilateral ovariectomy OR >12 mo since LMP with no prior hysterectomy)	-23337	Alive	TUMOR FREE	508								Negative		0	508	0	508	0	508	0	508
TCGA-C8-A275-01	TCGA-C8-A275	BRCA	56	FEMALE	ASIAN	Stage IIA		Infiltrating Ductal Carcinoma		2010	Post (prior bilateral ovariectomy OR >12 mo since LMP with no prior hysterectomy)	-20774	Alive	TUMOR FREE	1								Negative		0	1	0	1	0	1	0	1
TCGA-C8-A278-01	TCGA-C8-A278	BRCA	61	FEMALE	ASIAN	Stage IIIA		Infiltrating Ductal Carcinoma		2010	Post (prior bilateral ovariectomy OR >12 mo since LMP with no prior hysterectomy)	-22598	Alive	TUMOR FREE	297								Negative		0	297	0	297	0	297	0	297
TCGA-C8-A27A-01	TCGA-C8-A27A	BRCA	48	FEMALE	ASIAN	Stage IIB		Infiltrating Ductal Carcinoma		2010	Peri (6-12 months since last menstrual period)	-17779	Alive	TUMOR FREE	747								Negative		0	747	0	747	0	747	0	747
TCGA-C8-A27B-01	TCGA-C8-A27B	BRCA	48	FEMALE	ASIAN	Stage IIB		Infiltrating Ductal Carcinoma		2011	Peri (6-12 months since last menstrual period)	-17763	Alive	TUMOR FREE	439								Negative		0	439	0	439	0	439	0	439
TCGA-C8-A3M7-01	TCGA-C8-A3M7	BRCA	60	FEMALE	ASIAN	Stage IIIB		Infiltrating Lobular Carcinoma		2010	Post (prior bilateral ovariectomy OR >12 mo since LMP with no prior hysterectomy)	-22096	Dead	WITH TUMOR		1034		Locoregional Recurrence			1034		Negative		1	1034	1	1034	1	1034	1	1034
TCGA-C8-A3M8-01	TCGA-C8-A3M8	BRCA	68	FEMALE	ASIAN	Stage IA		Infiltrating Lobular Carcinoma		2011	Post (prior bilateral ovariectomy OR >12 mo since LMP with no prior hysterectomy)	-24877	Alive	TUMOR FREE	394								Negative		0	394	0	394	0	394	0	394
TCGA-C8-A8HP-01	TCGA-C8-A8HP	BRCA	59	FEMALE	ASIAN	Stage IIIA		Metaplastic Carcinoma		2013	Post (prior bilateral ovariectomy OR >12 mo since LMP with no prior hysterectomy)	-21613	Alive	TUMOR FREE	396								Negative		0	396	0	396	0	396	0	396
TCGA-C8-A8HQ-01	TCGA-C8-A8HQ	BRCA	53	FEMALE	ASIAN	Stage IIB		Mucinous Carcinoma		2013	Post (prior bilateral ovariectomy OR >12 mo since LMP with no prior hysterectomy)	-19432	Alive	TUMOR FREE	380								Negative		0	380	0	380	0	380	0	380
TCGA-C8-A8HR-01	TCGA-C8-A8HR	BRCA	49	FEMALE	ASIAN	Stage IIIA		Infiltrating Lobular Carcinoma		2013	Peri (6-12 months since last menstrual period)	-17921	Alive	TUMOR FREE	408								Negative		0	408	0	408	0	408	0	408
TCGA-C8-A9FZ-01	TCGA-C8-A9FZ	BRCA	49	FEMALE	WHITE	Stage IIB		Mixed Histology (please specify)		2013	Pre (<6 months since LMP AND no prior bilateral ovariectomy AND not on estrogen replacement)	-18038	Alive	TUMOR FREE	592								Negative		0	592	0	592	0	592	0	592
TCGA-D8-A13Y-01	TCGA-D8-A13Y	BRCA	52	FEMALE	WHITE	Stage IA		Infiltrating Ductal Carcinoma		2010	Post (prior bilateral ovariectomy OR >12 mo since LMP with no prior hysterectomy)	-19028	Alive	TUMOR FREE	1728								Negative		0	1728	0	1728	0	1728	0	1728
TCGA-D8-A13Z-01	TCGA-D8-A13Z	BRCA	51	FEMALE	WHITE			Infiltrating Ductal Carcinoma		2010	Post (prior bilateral ovariectomy OR >12 mo since LMP with no prior hysterectomy)	-18942	Alive	TUMOR FREE	635								Negative		0	635	0	635	0	635	0	635
TCGA-D8-A140-01	TCGA-D8-A140	BRCA	62	FEMALE	WHITE	Stage IIB		Infiltrating Ductal Carcinoma		2010	Post (prior bilateral ovariectomy OR >12 mo since LMP with no prior hysterectomy)	-22900	Alive	TUMOR FREE	403								Negative		0	403	0	403	0	403	0	403
TCGA-D8-A141-01	TCGA-D8-A141	BRCA	40	FEMALE	WHITE			Infiltrating Ductal Carcinoma		2010	Indeterminate (neither Pre or Postmenopausal)	-14626	Alive	TUMOR FREE	626								Negative		0	626	0	626	0	626	0	626
TCGA-D8-A142-01	TCGA-D8-A142	BRCA	74	FEMALE	WHITE	Stage IIB		Infiltrating Ductal Carcinoma		2010	Post (prior bilateral ovariectomy OR >12 mo since LMP with no prior hysterectomy)	-27313	Alive	TUMOR FREE	425								Negative		0	425	0	425	0	425	0	425
TCGA-D8-A143-01	TCGA-D8-A143	BRCA	51	FEMALE	WHITE	Stage IIA		Infiltrating Ductal Carcinoma		2010	Post (prior bilateral ovariectomy OR >12 mo since LMP with no prior hysterectomy)	-18984	Alive	TUMOR FREE	431								Negative		0	431	0	431	0	431	0	431
TCGA-D8-A145-01	TCGA-D8-A145	BRCA	80	FEMALE	WHITE	Stage IIA		Infiltrating Ductal Carcinoma		2010	Post (prior bilateral ovariectomy OR >12 mo since LMP with no prior hysterectomy)	-29280	Alive	TUMOR FREE	410								Negative		0	410	0	410	0	410	0	410
TCGA-D8-A146-01	TCGA-D8-A146	BRCA	57	FEMALE	WHITE	Stage IIA		Infiltrating Ductal Carcinoma		2010	Post (prior bilateral ovariectomy OR >12 mo since LMP with no prior hysterectomy)	-20861	Alive	TUMOR FREE	643								Negative		0	643	0	643	0	643	0	643
TCGA-D8-A147-01	TCGA-D8-A147	BRCA	45	FEMALE	WHITE			Infiltrating Ductal Carcinoma		2010	Indeterminate (neither Pre or Postmenopausal)	-16736	Alive	TUMOR FREE	584								Negative		0	584	0	584	0	584	0	584
TCGA-D8-A1J8-01	TCGA-D8-A1J8	BRCA	77	FEMALE	WHITE	Stage IIB		Infiltrating Ductal Carcinoma		2010	Post (prior bilateral ovariectomy OR >12 mo since LMP with no prior hysterectomy)	-28444	Alive	TUMOR FREE	431								Negative		0	431	0	431	0	431	0	431
TCGA-D8-A1J9-01	TCGA-D8-A1J9	BRCA	48	FEMALE	WHITE	Stage IA		Infiltrating Ductal Carcinoma		2010	Post (prior bilateral ovariectomy OR >12 mo since LMP with no prior hysterectomy)	-17879	Alive	TUMOR FREE	532								Negative		0	532	0	532	0	532	0	532
TCGA-D8-A1JA-01	TCGA-D8-A1JA	BRCA	60	FEMALE	WHITE			Infiltrating Ductal Carcinoma		2010	Post (prior bilateral ovariectomy OR >12 mo since LMP with no prior hysterectomy)	-21918	Alive	WITH TUMOR	502			Locoregional Disease			431		Negative		0	502	0	502	1	431	1	431
TCGA-D8-A1JB-01	TCGA-D8-A1JB	BRCA	54	FEMALE	WHITE	Stage IIB		Infiltrating Ductal Carcinoma		2010	Post (prior bilateral ovariectomy OR >12 mo since LMP with no prior hysterectomy)	-19822	Alive	TUMOR FREE	1688								Negative		0	1688	0	1688	0	1688	0	1688
TCGA-D8-A1JC-01	TCGA-D8-A1JC	BRCA	59	FEMALE	WHITE	Stage IIIA		Infiltrating Ductal Carcinoma		2010	Post (prior bilateral ovariectomy OR >12 mo since LMP with no prior hysterectomy)	-21898	Alive	TUMOR FREE	480								Negative		0	480	0	480	0	480	0	480
TCGA-D8-A1JD-01	TCGA-D8-A1JD	BRCA	41	FEMALE	WHITE	Stage IIB		Infiltrating Ductal Carcinoma		2010	Pre (<6 months since LMP AND no prior bilateral ovariectomy AND not on estrogen replacement)	-15166	Alive	TUMOR FREE	552								Negative		0	552	0	552	0	552	0	552
TCGA-D8-A1JE-01	TCGA-D8-A1JE	BRCA	62	FEMALE	WHITE	Stage IIA		Infiltrating Ductal Carcinoma		2010	Post (prior bilateral ovariectomy OR >12 mo since LMP with no prior hysterectomy)	-22683	Alive	TUMOR FREE	575								Negative		0	575	0	575	0	575	0	575
TCGA-D8-A1JF-01	TCGA-D8-A1JF	BRCA	79	FEMALE	WHITE	Stage IIIA		Infiltrating Ductal Carcinoma		2010	Post (prior bilateral ovariectomy OR >12 mo since LMP with no prior hysterectomy)	-29199	Alive	TUMOR FREE	366								Negative		0	366	0	366	0	366	0	366
TCGA-D8-A1JG-01	TCGA-D8-A1JG	BRCA	62	FEMALE	WHITE	Stage IIA		Infiltrating Ductal Carcinoma		2010	Post (prior bilateral ovariectomy OR >12 mo since LMP with no prior hysterectomy)	-22878	Alive	TUMOR FREE	1612								Negative		0	1612	0	1612	0	1612	0	1612
TCGA-D8-A1JH-01	TCGA-D8-A1JH	BRCA	56	FEMALE	WHITE	Stage IA		Infiltrating Ductal Carcinoma		2010	Post (prior bilateral ovariectomy OR >12 mo since LMP with no prior hysterectomy)	-20497	Alive	TUMOR FREE	426								Negative		0	426	0	426	0	426	0	426
TCGA-D8-A1JI-01	TCGA-D8-A1JI	BRCA	54	FEMALE	WHITE	Stage IIA		Infiltrating Ductal Carcinoma		2010	Post (prior bilateral ovariectomy OR >12 mo since LMP with no prior hysterectomy)	-20072	Alive	TUMOR FREE	577								Negative		0	577	0	577	0	577	0	577
TCGA-D8-A1JJ-01	TCGA-D8-A1JJ	BRCA	54	FEMALE	WHITE	Stage IIA		Infiltrating Ductal Carcinoma		2010	Post (prior bilateral ovariectomy OR >12 mo since LMP with no prior hysterectomy)	-19966	Alive	TUMOR FREE	611								Negative		0	611	0	611	0	611	0	611
TCGA-D8-A1JK-01	TCGA-D8-A1JK	BRCA	90	FEMALE	WHITE	Stage IIA		Infiltrating Ductal Carcinoma		2010	Post (prior bilateral ovariectomy OR >12 mo since LMP with no prior hysterectomy)	-32872	Alive	TUMOR FREE	612								Negative		0	612	0	612	0	612	0	612
TCGA-D8-A1JL-01	TCGA-D8-A1JL	BRCA	72	FEMALE	WHITE	Stage IIA		Infiltrating Ductal Carcinoma		2010	Post (prior bilateral ovariectomy OR >12 mo since LMP with no prior hysterectomy)	-26484	Alive	TUMOR FREE	611								Negative		0	611	0	611	0	611	0	611
TCGA-D8-A1JM-01	TCGA-D8-A1JM	BRCA	59	FEMALE	WHITE	Stage IIB		Infiltrating Ductal Carcinoma		2010	Post (prior bilateral ovariectomy OR >12 mo since LMP with no prior hysterectomy)	-21602	Alive	TUMOR FREE	590								Negative		0	590	0	590	0	590	0	590
TCGA-D8-A1JN-01	TCGA-D8-A1JN	BRCA	80	FEMALE	WHITE	Stage IIIC		Infiltrating Lobular Carcinoma		2010	Post (prior bilateral ovariectomy OR >12 mo since LMP with no prior hysterectomy)	-29331	Alive	TUMOR FREE	620								Negative		0	620	0	620	0	620	0	620
TCGA-D8-A1JP-01	TCGA-D8-A1JP	BRCA	73	FEMALE	WHITE	Stage IA		Infiltrating Ductal Carcinoma		2010	Post (prior bilateral ovariectomy OR >12 mo since LMP with no prior hysterectomy)	-26862	Alive	TUMOR FREE	639								Negative		0	639	0	639	0	639	0	639
TCGA-D8-A1JS-01	TCGA-D8-A1JS	BRCA	77	FEMALE	WHITE	Stage IA		Other, specify		2010	Post (prior bilateral ovariectomy OR >12 mo since LMP with no prior hysterectomy)	-28178	Alive	TUMOR FREE	371								Negative		0	371	0	371	0	371	0	371
TCGA-D8-A1JT-01	TCGA-D8-A1JT	BRCA	70	FEMALE	WHITE	Stage IIA		Other, specify		2010	Post (prior bilateral ovariectomy OR >12 mo since LMP with no prior hysterectomy)	-25677	Alive	TUMOR FREE	405								Negative		0	405	0	405	0	405	0	405
TCGA-D8-A1JU-01	TCGA-D8-A1JU	BRCA	51	FEMALE	WHITE	Stage IA		Infiltrating Ductal Carcinoma		2010	Post (prior bilateral ovariectomy OR >12 mo since LMP with no prior hysterectomy)	-18733	Alive	TUMOR FREE	447								Negative		0	447	0	447	0	447	0	447
TCGA-D8-A1X5-01	TCGA-D8-A1X5	BRCA	81	FEMALE	WHITE	Stage IIIC		Infiltrating Ductal Carcinoma		2010	Post (prior bilateral ovariectomy OR >12 mo since LMP with no prior hysterectomy)	-29734	Alive	TUMOR FREE	565								Negative		0	565	0	565	0	565	0	565
TCGA-D8-A1X6-01	TCGA-D8-A1X6	BRCA	80	FEMALE	WHITE	Stage IIIA		Infiltrating Ductal Carcinoma		2010	Post (prior bilateral ovariectomy OR >12 mo since LMP with no prior hysterectomy)	-29256	Alive	TUMOR FREE	541								Negative		0	541	0	541	0	541	0	541
TCGA-D8-A1X7-01	TCGA-D8-A1X7	BRCA	40	FEMALE	WHITE	Stage IIA		Other, specify		2010	Pre (<6 months since LMP AND no prior bilateral ovariectomy AND not on estrogen replacement)	-14858	Alive	TUMOR FREE	509								Negative		0	509	0	509	0	509	0	509
TCGA-D8-A1X8-01	TCGA-D8-A1X8	BRCA	62	FEMALE	WHITE	Stage IIIA		Infiltrating Lobular Carcinoma		2010	Post (prior bilateral ovariectomy OR >12 mo since LMP with no prior hysterectomy)	-22995	Alive	TUMOR FREE	783								Negative		0	783	0	783	0	783	0	783
TCGA-D8-A1X9-01	TCGA-D8-A1X9	BRCA	66	FEMALE	WHITE	Stage IIB		Infiltrating Ductal Carcinoma		2010	Post (prior bilateral ovariectomy OR >12 mo since LMP with no prior hysterectomy)	-24417	Alive	TUMOR FREE	727										0	727	0	727			0	727
TCGA-D8-A1XA-01	TCGA-D8-A1XA	BRCA	64	FEMALE	WHITE	Stage IA		Infiltrating Ductal Carcinoma		2010	Post (prior bilateral ovariectomy OR >12 mo since LMP with no prior hysterectomy)	-23387	Alive	TUMOR FREE	839								Negative		0	839	0	839	0	839	0	839
TCGA-D8-A1XB-01	TCGA-D8-A1XB	BRCA	62	FEMALE	WHITE	Stage IIB		Infiltrating Ductal Carcinoma		2010	Post (prior bilateral ovariectomy OR >12 mo since LMP with no prior hysterectomy)	-22976	Alive	TUMOR FREE	552								Negative		0	552	0	552	0	552	0	552
TCGA-D8-A1XC-01	TCGA-D8-A1XC	BRCA	85	FEMALE	WHITE	Stage IIIB		Mucinous Carcinoma		2010	Post (prior bilateral ovariectomy OR >12 mo since LMP with no prior hysterectomy)	-31220	Dead	WITH TUMOR		377							Negative		1	377	1	377			1	377
TCGA-D8-A1XD-01	TCGA-D8-A1XD	BRCA	36	FEMALE	WHITE	Stage IIIA		Infiltrating Ductal Carcinoma		2010	Pre (<6 months since LMP AND no prior bilateral ovariectomy AND not on estrogen replacement)	-13510	Alive	TUMOR FREE	522								Negative		0	522	0	522	0	522	0	522
TCGA-D8-A1XF-01	TCGA-D8-A1XF	BRCA	45	FEMALE	WHITE	Stage IIA		Infiltrating Ductal Carcinoma		2010	Pre (<6 months since LMP AND no prior bilateral ovariectomy AND not on estrogen replacement)	-16787	Alive	TUMOR FREE	463										0	463	0	463			0	463
TCGA-D8-A1XG-01	TCGA-D8-A1XG	BRCA	86	FEMALE	WHITE	Stage IIIB		Infiltrating Ductal Carcinoma		2010	Post (prior bilateral ovariectomy OR >12 mo since LMP with no prior hysterectomy)	-31748	Alive	TUMOR FREE	448								Negative		0	448	0	448	0	448	0	448
TCGA-D8-A1XJ-01	TCGA-D8-A1XJ	BRCA	76	FEMALE	WHITE	Stage IIIA		Other, specify		2010	Post (prior bilateral ovariectomy OR >12 mo since LMP with no prior hysterectomy)	-27967	Alive	TUMOR FREE	664								Negative		0	664	0	664	0	664	0	664
TCGA-D8-A1XK-01	TCGA-D8-A1XK	BRCA	55	FEMALE	WHITE	Stage IIB		Infiltrating Ductal Carcinoma		2010	Post (prior bilateral ovariectomy OR >12 mo since LMP with no prior hysterectomy)	-20092	Alive	TUMOR FREE	441								Negative		0	441	0	441	0	441	0	441
TCGA-D8-A1XL-01	TCGA-D8-A1XL	BRCA	34	FEMALE	WHITE	Stage IIB		Infiltrating Ductal Carcinoma		2010	Pre (<6 months since LMP AND no prior bilateral ovariectomy AND not on estrogen replacement)	-12668	Alive	TUMOR FREE	606								Negative		0	606	0	606	0	606	0	606
TCGA-D8-A1XM-01	TCGA-D8-A1XM	BRCA	57	FEMALE	WHITE	Stage IA		Infiltrating Ductal Carcinoma		2010	Post (prior bilateral ovariectomy OR >12 mo since LMP with no prior hysterectomy)	-21056	Alive	TUMOR FREE	538								Negative		0	538	0	538	0	538	0	538
TCGA-D8-A1XO-01	TCGA-D8-A1XO	BRCA	56	FEMALE	WHITE	Stage IIB		Infiltrating Lobular Carcinoma		2010	Post (prior bilateral ovariectomy OR >12 mo since LMP with no prior hysterectomy)	-20606	Alive	TUMOR FREE	1682								Negative		0	1682	0	1682	0	1682	0	1682
TCGA-D8-A1XQ-01	TCGA-D8-A1XQ	BRCA	69	FEMALE	WHITE	Stage IIA		Infiltrating Ductal Carcinoma		2010	Post (prior bilateral ovariectomy OR >12 mo since LMP with no prior hysterectomy)	-25345	Alive	TUMOR FREE	499								Negative		0	499	0	499	0	499	0	499
TCGA-D8-A1XR-01	TCGA-D8-A1XR	BRCA	56	FEMALE	WHITE	Stage IIB		Infiltrating Ductal Carcinoma		2010	Post (prior bilateral ovariectomy OR >12 mo since LMP with no prior hysterectomy)	-20488	Alive	TUMOR FREE	482								Negative		0	482	0	482	0	482	0	482
TCGA-D8-A1XS-01	TCGA-D8-A1XS	BRCA	48	MALE	WHITE	Stage IIIC		Other, specify		2010		-17708	Alive	TUMOR FREE	496								Negative		0	496	0	496	0	496	0	496
TCGA-D8-A1XT-01	TCGA-D8-A1XT	BRCA	61	FEMALE	WHITE	Stage IIA		Infiltrating Ductal Carcinoma		2010	Post (prior bilateral ovariectomy OR >12 mo since LMP with no prior hysterectomy)	-22448	Alive	TUMOR FREE	506								Negative		0	506	0	506	0	506	0	506
TCGA-D8-A1XU-01	TCGA-D8-A1XU	BRCA	56	FEMALE	WHITE	Stage IA		Infiltrating Ductal Carcinoma		2010	Post (prior bilateral ovariectomy OR >12 mo since LMP with no prior hysterectomy)	-20715	Alive	TUMOR FREE	395								Negative		0	395	0	395	0	395	0	395
TCGA-D8-A1XV-01	TCGA-D8-A1XV	BRCA	84	FEMALE	WHITE	Stage IIA		Mucinous Carcinoma		2010	Post (prior bilateral ovariectomy OR >12 mo since LMP with no prior hysterectomy)	-30830	Alive	TUMOR FREE	461								Negative		0	461	0	461	0	461	0	461
TCGA-D8-A1XW-01	TCGA-D8-A1XW	BRCA	53	FEMALE	WHITE	Stage IIA		Infiltrating Ductal Carcinoma		2011	Post (prior bilateral ovariectomy OR >12 mo since LMP with no prior hysterectomy)	-19478	Alive	TUMOR FREE	1309								Negative		0	1309	0	1309	0	1309	0	1309
TCGA-D8-A1XY-01	TCGA-D8-A1XY	BRCA	74	FEMALE	WHITE	Stage IIA		Infiltrating Ductal Carcinoma		2010	Post (prior bilateral ovariectomy OR >12 mo since LMP with no prior hysterectomy)	-27106	Alive	TUMOR FREE	503										0	503	0	503			0	503
TCGA-D8-A1XZ-01	TCGA-D8-A1XZ	BRCA	81	FEMALE	WHITE	Stage IIIA		Infiltrating Ductal Carcinoma		2010	Post (prior bilateral ovariectomy OR >12 mo since LMP with no prior hysterectomy)	-29916	Alive	TUMOR FREE	466								Negative		0	466	0	466	0	466	0	466
TCGA-D8-A1Y0-01	TCGA-D8-A1Y0	BRCA	65	FEMALE	WHITE	Stage IIIA		Infiltrating Ductal Carcinoma		2010	Post (prior bilateral ovariectomy OR >12 mo since LMP with no prior hysterectomy)	-24083	Alive	TUMOR FREE	472										0	472	0	472			0	472
TCGA-D8-A1Y1-01	TCGA-D8-A1Y1	BRCA	80	FEMALE	WHITE	Stage IIIA		Infiltrating Ductal Carcinoma		2010	Post (prior bilateral ovariectomy OR >12 mo since LMP with no prior hysterectomy)	-29474	Dead	WITH TUMOR		302									1	302	1	302			1	302
TCGA-D8-A1Y2-01	TCGA-D8-A1Y2	BRCA	71	FEMALE	WHITE	Stage IIA		Infiltrating Ductal Carcinoma		2011	Post (prior bilateral ovariectomy OR >12 mo since LMP with no prior hysterectomy)	-26021	Alive	TUMOR FREE	433								Negative		0	433	0	433	0	433	0	433
TCGA-D8-A1Y3-01	TCGA-D8-A1Y3	BRCA	61	FEMALE	WHITE	Stage IIIA		Infiltrating Ductal Carcinoma		2011	Post (prior bilateral ovariectomy OR >12 mo since LMP with no prior hysterectomy)	-22317	Alive	TUMOR FREE	430								Negative		0	430	0	430	0	430	0	430
TCGA-D8-A27E-01	TCGA-D8-A27E	BRCA	66	FEMALE	WHITE	Stage IA		Other, specify		2010	Post (prior bilateral ovariectomy OR >12 mo since LMP with no prior hysterectomy)	-24315	Alive	TUMOR FREE	530								Negative		0	530	0	530	0	530	0	530
TCGA-D8-A27F-01	TCGA-D8-A27F	BRCA	40	FEMALE	WHITE	Stage IIA		Infiltrating Ductal Carcinoma		2010	Pre (<6 months since LMP AND no prior bilateral ovariectomy AND not on estrogen replacement)	-14731	Alive	TUMOR FREE	488								Negative		0	488	0	488	0	488	0	488
TCGA-D8-A27G-01	TCGA-D8-A27G	BRCA	75	FEMALE	WHITE	Stage IIA		Infiltrating Lobular Carcinoma		2010	Post (prior bilateral ovariectomy OR >12 mo since LMP with no prior hysterectomy)	-27521	Alive	TUMOR FREE	409								Negative		0	409	0	409	0	409	0	409
TCGA-D8-A27H-01	TCGA-D8-A27H	BRCA	72	FEMALE	WHITE	Stage IIA		Infiltrating Ductal Carcinoma		2011	Post (prior bilateral ovariectomy OR >12 mo since LMP with no prior hysterectomy)	-26588	Alive	TUMOR FREE	397								Negative		0	397	0	397	0	397	0	397
TCGA-D8-A27I-01	TCGA-D8-A27I	BRCA	58	FEMALE	WHITE	Stage IIIA		Infiltrating Lobular Carcinoma		2010	Post (prior bilateral ovariectomy OR >12 mo since LMP with no prior hysterectomy)	-21327	Alive	TUMOR FREE	439								Negative		0	439	0	439	0	439	0	439
TCGA-D8-A27K-01	TCGA-D8-A27K	BRCA	47	FEMALE	WHITE	Stage IIB		Infiltrating Ductal Carcinoma		2011	Post (prior bilateral ovariectomy OR >12 mo since LMP with no prior hysterectomy)	-17426	Alive	TUMOR FREE	1461								Negative		0	1461	0	1461	0	1461	0	1461
TCGA-D8-A27L-01	TCGA-D8-A27L	BRCA	49	FEMALE	WHITE	Stage IIIA		Infiltrating Ductal Carcinoma		2011	Post (prior bilateral ovariectomy OR >12 mo since LMP with no prior hysterectomy)	-18025	Alive	TUMOR FREE	499								Negative		0	499	0	499	0	499	0	499
TCGA-D8-A27M-01	TCGA-D8-A27M	BRCA	59	FEMALE	WHITE	Stage IA		Infiltrating Ductal Carcinoma		2011	Post (prior bilateral ovariectomy OR >12 mo since LMP with no prior hysterectomy)	-21910	Alive	TUMOR FREE	410								Negative		0	410	0	410	0	410	0	410
TCGA-D8-A27N-01	TCGA-D8-A27N	BRCA	36	FEMALE	WHITE	Stage IIIA		Infiltrating Ductal Carcinoma		2011	Pre (<6 months since LMP AND no prior bilateral ovariectomy AND not on estrogen replacement)	-13243	Alive	TUMOR FREE	519								Negative		0	519	0	519	0	519	0	519
TCGA-D8-A27P-01	TCGA-D8-A27P	BRCA	64	FEMALE	WHITE	Stage IA		Infiltrating Ductal Carcinoma		2011	Post (prior bilateral ovariectomy OR >12 mo since LMP with no prior hysterectomy)	-23576	Alive	TUMOR FREE	49								Negative		0	49	0	49	0	49	0	49
TCGA-D8-A27R-01	TCGA-D8-A27R	BRCA	41	FEMALE	WHITE	Stage IIIC		Infiltrating Ductal Carcinoma		2011	Post (prior bilateral ovariectomy OR >12 mo since LMP with no prior hysterectomy)	-15122	Alive	TUMOR FREE	307								Negative		0	307	0	307	0	307	0	307
TCGA-D8-A27T-01	TCGA-D8-A27T	BRCA	53	FEMALE	WHITE	Stage IIIC		Infiltrating Lobular Carcinoma		2011	Post (prior bilateral ovariectomy OR >12 mo since LMP with no prior hysterectomy)	-19591	Alive	TUMOR FREE	398								Negative		0	398	0	398	0	398	0	398
TCGA-D8-A27V-01	TCGA-D8-A27V	BRCA	62	FEMALE	WHITE	Stage IIA		Infiltrating Lobular Carcinoma		2011	Post (prior bilateral ovariectomy OR >12 mo since LMP with no prior hysterectomy)	-22958	Alive	TUMOR FREE	381								Negative		0	381	0	381	0	381	0	381
TCGA-D8-A27W-01	TCGA-D8-A27W	BRCA	55	FEMALE	WHITE	Stage IIIB		Mucinous Carcinoma		2011	Post (prior bilateral ovariectomy OR >12 mo since LMP with no prior hysterectomy)	-20173	Alive	TUMOR FREE	373								Negative		0	373	0	373	0	373	0	373
TCGA-D8-A3Z5-01	TCGA-D8-A3Z5	BRCA	54	FEMALE	WHITE	Stage IIIC		Infiltrating Lobular Carcinoma		2011	Post (prior bilateral ovariectomy OR >12 mo since LMP with no prior hysterectomy)	-19846	Alive	TUMOR FREE	1015								Negative		0	1015	0	1015	0	1015	0	1015
TCGA-D8-A3Z6-01	TCGA-D8-A3Z6	BRCA	56	FEMALE	WHITE	Stage IIIC		Infiltrating Lobular Carcinoma		2011	Post (prior bilateral ovariectomy OR >12 mo since LMP with no prior hysterectomy)	-20629	Alive	TUMOR FREE	563								Negative		0	563	0	563	0	563	0	563
TCGA-D8-A4Z1-01	TCGA-D8-A4Z1	BRCA	68	FEMALE	WHITE	Stage IA		Infiltrating Lobular Carcinoma		2012	Post (prior bilateral ovariectomy OR >12 mo since LMP with no prior hysterectomy)	-25097	Alive	TUMOR FREE	659								Negative		0	659	0	659	0	659	0	659
TCGA-D8-A73U-01	TCGA-D8-A73U	BRCA	88	FEMALE	WHITE	Stage IIA		Infiltrating Lobular Carcinoma		2012	Post (prior bilateral ovariectomy OR >12 mo since LMP with no prior hysterectomy)	-32208	Alive	WITH TUMOR	492								Negative		0	492	0	492	0	492	0	492
TCGA-D8-A73W-01	TCGA-D8-A73W	BRCA	79	FEMALE	WHITE	Stage IIIA		Mucinous Carcinoma		2013	Post (prior bilateral ovariectomy OR >12 mo since LMP with no prior hysterectomy)	-29125	Dead	WITH TUMOR		385		Distant Metastasis	Lung		21		Negative		1	385	1	385	1	21	1	21
TCGA-D8-A73X-01	TCGA-D8-A73X	BRCA	53	FEMALE	WHITE	Stage IIA		Other, specify		2013	Post (prior bilateral ovariectomy OR >12 mo since LMP with no prior hysterectomy)	-19607	Alive	TUMOR FREE	767								Negative		0	767	0	767	0	767	0	767
TCGA-E2-A105-01	TCGA-E2-A105	BRCA	79	FEMALE	WHITE	Stage IIA		Infiltrating Ductal Carcinoma		2007	Post (prior bilateral ovariectomy OR >12 mo since LMP with no prior hysterectomy)	-28855	Alive	TUMOR FREE	1308								Negative		0	1308	0	1308	0	1308	0	1308
TCGA-E2-A106-01	TCGA-E2-A106	BRCA	34	FEMALE	ASIAN	Stage IB		Infiltrating Ductal Carcinoma		2006	Pre (<6 months since LMP AND no prior bilateral ovariectomy AND not on estrogen replacement)	-12528	Alive	TUMOR FREE	2541								Negative		0	2541	0	2541	0	2541	0	2541
TCGA-E2-A107-01	TCGA-E2-A107	BRCA	54	FEMALE	WHITE	Stage IIIA		Infiltrating Lobular Carcinoma		2008	Post (prior bilateral ovariectomy OR >12 mo since LMP with no prior hysterectomy)	-20065	Alive	TUMOR FREE	1047								Negative		0	1047	0	1047	0	1047	0	1047
TCGA-E2-A108-01	TCGA-E2-A108	BRCA	64	FEMALE	WHITE	Stage IIIA		Infiltrating Ductal Carcinoma		2009	Post (prior bilateral ovariectomy OR >12 mo since LMP with no prior hysterectomy)	-23530	Alive	WITH TUMOR	837								Negative		0	837	0	837	0	837	0	837
TCGA-E2-A109-01	TCGA-E2-A109	BRCA	64	FEMALE	WHITE	Stage IIA		Infiltrating Ductal Carcinoma		2007	Post (prior bilateral ovariectomy OR >12 mo since LMP with no prior hysterectomy)	-23521	Alive	TUMOR FREE	1417								Negative		0	1417	0	1417	0	1417	0	1417
TCGA-E2-A10A-01	TCGA-E2-A10A	BRCA	41	FEMALE	WHITE	Stage IIB		Infiltrating Ductal Carcinoma		2007	Pre (<6 months since LMP AND no prior bilateral ovariectomy AND not on estrogen replacement)	-15085	Alive	WITH TUMOR	1229			Distant Metastasis	Bone		75		Negative		0	1229	0	1229	1	75	1	75
TCGA-E2-A10B-01	TCGA-E2-A10B	BRCA	67	FEMALE	WHITE	Stage IIB		Infiltrating Ductal Carcinoma		2007	Post (prior bilateral ovariectomy OR >12 mo since LMP with no prior hysterectomy)	-24577	Alive	TUMOR FREE	1141			New Primary Tumor	Lung		195		Close		0	1141	0	1141			1	195
TCGA-E2-A10C-01	TCGA-E2-A10C	BRCA	54	FEMALE	WHITE	Stage IIB		Infiltrating Ductal Carcinoma		2008	Post (prior bilateral ovariectomy OR >12 mo since LMP with no prior hysterectomy)	-19849	Alive	TUMOR FREE	1220								Negative		0	1220	0	1220	0	1220	0	1220
TCGA-E2-A10E-01	TCGA-E2-A10E	BRCA	64	FEMALE	WHITE	Stage IIA		Infiltrating Ductal Carcinoma		2008	Post (prior bilateral ovariectomy OR >12 mo since LMP with no prior hysterectomy)	-23684	Alive	TUMOR FREE	865								Negative		0	865	0	865	0	865	0	865
TCGA-E2-A10F-01	TCGA-E2-A10F	BRCA	47	FEMALE	WHITE	Stage IIA		Infiltrating Lobular Carcinoma		2008	Pre (<6 months since LMP AND no prior bilateral ovariectomy AND not on estrogen replacement)	-17257	Alive	TUMOR FREE	878								Negative		0	878	0	878	0	878	0	878
TCGA-E2-A14N-01	TCGA-E2-A14N	BRCA	37	FEMALE	WHITE	Stage IIB		Infiltrating Ductal Carcinoma		2007	Pre (<6 months since LMP AND no prior bilateral ovariectomy AND not on estrogen replacement)	-13743	Alive	TUMOR FREE	1434								Negative		0	1434	0	1434	0	1434	0	1434
TCGA-E2-A14O-01	TCGA-E2-A14O	BRCA	76	FEMALE	WHITE	Stage IIIA		Infiltrating Ductal Carcinoma		2008	Post (prior bilateral ovariectomy OR >12 mo since LMP with no prior hysterectomy)	-27837	Alive	TUMOR FREE	1359								Negative		0	1359	0	1359	0	1359	0	1359
TCGA-E2-A14P-01	TCGA-E2-A14P	BRCA	79	FEMALE	WHITE	Stage IIIC		Infiltrating Ductal Carcinoma		2008	Post (prior bilateral ovariectomy OR >12 mo since LMP with no prior hysterectomy)	-28923	Alive	TUMOR FREE	1246								Negative		0	1246	0	1246	0	1246	0	1246
TCGA-E2-A14Q-01	TCGA-E2-A14Q	BRCA	50	FEMALE	WHITE	Stage IIB		Infiltrating Ductal Carcinoma		2008	Pre (<6 months since LMP AND no prior bilateral ovariectomy AND not on estrogen replacement)	-18507	Alive	TUMOR FREE	1163								Negative		0	1163	0	1163	0	1163	0	1163
TCGA-E2-A14R-01	TCGA-E2-A14R	BRCA	62	FEMALE	WHITE	Stage IIA		Infiltrating Ductal Carcinoma		2008	Post (prior bilateral ovariectomy OR >12 mo since LMP with no prior hysterectomy)	-22686	Alive	TUMOR FREE	1174			New Primary Tumor	Other, specify	Endometrial	971		Negative		0	1174	0	1174	0	1174	1	971
TCGA-E2-A14S-01	TCGA-E2-A14S	BRCA	65	FEMALE	WHITE	Stage I		Infiltrating Ductal Carcinoma		2008	Post (prior bilateral ovariectomy OR >12 mo since LMP with no prior hysterectomy)	-23878	Alive	TUMOR FREE	1009								Negative		0	1009	0	1009	0	1009	0	1009
TCGA-E2-A14T-01	TCGA-E2-A14T	BRCA	52	FEMALE	WHITE	Stage IIA		Infiltrating Ductal Carcinoma		2008	Post (prior bilateral ovariectomy OR >12 mo since LMP with no prior hysterectomy)	-19237	Alive	TUMOR FREE	2311								Negative		0	2311	0	2311	0	2311	0	2311
TCGA-E2-A14U-01	TCGA-E2-A14U	BRCA	74	FEMALE	WHITE	Stage I		Infiltrating Lobular Carcinoma		2008	Post (prior bilateral ovariectomy OR >12 mo since LMP with no prior hysterectomy)	-27389	Alive	TUMOR FREE	1318								Negative		0	1318	0	1318	0	1318	0	1318
TCGA-E2-A14V-01	TCGA-E2-A14V	BRCA	53	FEMALE	WHITE	Stage IIB		Infiltrating Ductal Carcinoma		2008	Post (prior bilateral ovariectomy OR >12 mo since LMP with no prior hysterectomy)	-19643	Alive	TUMOR FREE	1042								Negative		0	1042	0	1042	0	1042	0	1042
TCGA-E2-A14W-01	TCGA-E2-A14W	BRCA	78	MALE	WHITE	Stage IIA		Infiltrating Ductal Carcinoma		2008		-28664	Alive	TUMOR FREE	974								Negative		0	974	0	974	0	974	0	974
TCGA-E2-A14X-01	TCGA-E2-A14X	BRCA	55	FEMALE	BLACK OR AFRICAN AMERICAN	Stage IIIA		Infiltrating Ductal Carcinoma		2009	Post (prior bilateral ovariectomy OR >12 mo since LMP with no prior hysterectomy)	-20105	Alive	TUMOR FREE	972								Negative		0	972	0	972	0	972	0	972
TCGA-E2-A14Y-01	TCGA-E2-A14Y	BRCA	35	FEMALE	WHITE	Stage IIA		Infiltrating Ductal Carcinoma		2009	Pre (<6 months since LMP AND no prior bilateral ovariectomy AND not on estrogen replacement)	-13004	Alive	TUMOR FREE	2109								Negative		0	2109	0	2109	0	2109	0	2109
TCGA-E2-A14Y-11	TCGA-E2-A14Y	BRCA	35	FEMALE	WHITE	Stage IIA		Infiltrating Ductal Carcinoma		2009	Pre (<6 months since LMP AND no prior bilateral ovariectomy AND not on estrogen replacement)	-13004	Alive	TUMOR FREE	2109								Negative		0	2109	0	2109	0	2109	0	2109
TCGA-E2-A14Z-01	TCGA-E2-A14Z	BRCA	64	FEMALE	WHITE	Stage I		Infiltrating Ductal Carcinoma		2009	Post (prior bilateral ovariectomy OR >12 mo since LMP with no prior hysterectomy)	-23682	Dead	WITH TUMOR		563		Distant Metastasis	Bone		188		Negative		1	563	1	563	1	188	1	188
TCGA-E2-A150-01	TCGA-E2-A150	BRCA	48	FEMALE	WHITE	Stage IIA		Infiltrating Ductal Carcinoma		2009	Post (prior bilateral ovariectomy OR >12 mo since LMP with no prior hysterectomy)	-17580	Alive	TUMOR FREE	1935								Negative		0	1935	0	1935	0	1935	0	1935
TCGA-E2-A152-01	TCGA-E2-A152	BRCA	56	FEMALE	WHITE	Stage I		Infiltrating Ductal Carcinoma		2009	Post (prior bilateral ovariectomy OR >12 mo since LMP with no prior hysterectomy)	-20705	Alive	TUMOR FREE	2128			Distant Metastasis	Liver		54		Negative		0	2128	0	2128	1	54	1	54
TCGA-E2-A153-01	TCGA-E2-A153	BRCA	51	FEMALE	WHITE	Stage IIB		Infiltrating Ductal Carcinoma		2009	Pre (<6 months since LMP AND no prior bilateral ovariectomy AND not on estrogen replacement)	-18875	Alive	TUMOR FREE	707								Negative		0	707	0	707	0	707	0	707
TCGA-E2-A153-11	TCGA-E2-A153	BRCA	51	FEMALE	WHITE	Stage IIB		Infiltrating Ductal Carcinoma		2009	Pre (<6 months since LMP AND no prior bilateral ovariectomy AND not on estrogen replacement)	-18875	Alive	TUMOR FREE	707								Negative		0	707	0	707	0	707	0	707
TCGA-E2-A154-01	TCGA-E2-A154	BRCA	68	FEMALE	WHITE	Stage I		Infiltrating Ductal Carcinoma		2009	Post (prior bilateral ovariectomy OR >12 mo since LMP with no prior hysterectomy)	-24999	Alive	TUMOR FREE	591								Negative		0	591	0	591	0	591	0	591
TCGA-E2-A155-01	TCGA-E2-A155	BRCA	58	FEMALE	WHITE	Stage IIB		Infiltrating Ductal Carcinoma		2009	Post (prior bilateral ovariectomy OR >12 mo since LMP with no prior hysterectomy)	-21348	Alive	TUMOR FREE	640								Negative		0	640	0	640	0	640	0	640
TCGA-E2-A156-01	TCGA-E2-A156	BRCA	61	FEMALE	WHITE	Stage I		Infiltrating Ductal Carcinoma		2009	Post (prior bilateral ovariectomy OR >12 mo since LMP with no prior hysterectomy)	-22422	Alive	TUMOR FREE	726								Negative		0	726	0	726	0	726	0	726
TCGA-E2-A158-01	TCGA-E2-A158	BRCA	43	FEMALE	WHITE	Stage IIA		Infiltrating Ductal Carcinoma		2009	Pre (<6 months since LMP AND no prior bilateral ovariectomy AND not on estrogen replacement)	-15903	Alive	TUMOR FREE	450								Negative		0	450	0	450	0	450	0	450
TCGA-E2-A158-11	TCGA-E2-A158	BRCA	43	FEMALE	WHITE	Stage IIA		Infiltrating Ductal Carcinoma		2009	Pre (<6 months since LMP AND no prior bilateral ovariectomy AND not on estrogen replacement)	-15903	Alive	TUMOR FREE	450								Negative		0	450	0	450	0	450	0	450
TCGA-E2-A159-01	TCGA-E2-A159	BRCA	50	FEMALE	WHITE	Stage IIA		Infiltrating Ductal Carcinoma		2009	Pre (<6 months since LMP AND no prior bilateral ovariectomy AND not on estrogen replacement)	-18621	Alive	TUMOR FREE	762								Negative		0	762	0	762	0	762	0	762
TCGA-E2-A15A-06	TCGA-E2-A15A	BRCA	45	FEMALE	WHITE	Stage IIIC		Infiltrating Ductal Carcinoma		2009	Pre (<6 months since LMP AND no prior bilateral ovariectomy AND not on estrogen replacement)	-16750	Alive	TUMOR FREE	710								Negative		0	710	0	710	0	710	0	710
TCGA-E2-A15A-01	TCGA-E2-A15A	BRCA	45	FEMALE	WHITE	Stage IIIC		Infiltrating Ductal Carcinoma		2009	Pre (<6 months since LMP AND no prior bilateral ovariectomy AND not on estrogen replacement)	-16750	Alive	TUMOR FREE	710								Negative		0	710	0	710	0	710	0	710
TCGA-E2-A15C-01	TCGA-E2-A15C	BRCA	61	FEMALE	WHITE	Stage I		Infiltrating Ductal Carcinoma		2009	Post (prior bilateral ovariectomy OR >12 mo since LMP with no prior hysterectomy)	-22583	Alive	TUMOR FREE	694								Negative		0	694	0	694	0	694	0	694
TCGA-E2-A15D-01	TCGA-E2-A15D	BRCA	47	FEMALE	WHITE	Stage IIA		Infiltrating Ductal Carcinoma		2009	Pre (<6 months since LMP AND no prior bilateral ovariectomy AND not on estrogen replacement)	-17224	Alive	TUMOR FREE	526								Negative		0	526	0	526	0	526	0	526
TCGA-E2-A15E-06	TCGA-E2-A15E	BRCA	40	FEMALE	WHITE	Stage IIA		Infiltrating Ductal Carcinoma		2009	Pre (<6 months since LMP AND no prior bilateral ovariectomy AND not on estrogen replacement)	-14894	Alive	TUMOR FREE	630								Negative		0	630	0	630	0	630	0	630
TCGA-E2-A15E-01	TCGA-E2-A15E	BRCA	40	FEMALE	WHITE	Stage IIA		Infiltrating Ductal Carcinoma		2009	Pre (<6 months since LMP AND no prior bilateral ovariectomy AND not on estrogen replacement)	-14894	Alive	TUMOR FREE	630								Negative		0	630	0	630	0	630	0	630
TCGA-E2-A15F-01	TCGA-E2-A15F	BRCA	64	FEMALE	WHITE	Stage I		Infiltrating Ductal Carcinoma		2009	Post (prior bilateral ovariectomy OR >12 mo since LMP with no prior hysterectomy)	-23660	Alive	TUMOR FREE	658								Negative		0	658	0	658	0	658	0	658
TCGA-E2-A15G-01	TCGA-E2-A15G	BRCA	76	FEMALE	WHITE	Stage IIA		Mixed Histology (please specify)		2009	Post (prior bilateral ovariectomy OR >12 mo since LMP with no prior hysterectomy)	-28013	Alive	TUMOR FREE	554								Negative		0	554	0	554	0	554	0	554
TCGA-E2-A15H-01	TCGA-E2-A15H	BRCA	38	FEMALE	WHITE	Stage IIA		Infiltrating Ductal Carcinoma		2009	Pre (<6 months since LMP AND no prior bilateral ovariectomy AND not on estrogen replacement)	-13985	Alive	TUMOR FREE	393								Negative		0	393	0	393	0	393	0	393
TCGA-E2-A15I-01	TCGA-E2-A15I	BRCA	44	FEMALE	WHITE	Stage IIA		Infiltrating Ductal Carcinoma		2009	Pre (<6 months since LMP AND no prior bilateral ovariectomy AND not on estrogen replacement)	-16163	Alive	TUMOR FREE	1692								Negative		0	1692	0	1692	0	1692	0	1692
TCGA-E2-A15I-11	TCGA-E2-A15I	BRCA	44	FEMALE	WHITE	Stage IIA		Infiltrating Ductal Carcinoma		2009	Pre (<6 months since LMP AND no prior bilateral ovariectomy AND not on estrogen replacement)	-16163	Alive	TUMOR FREE	1692								Negative		0	1692	0	1692	0	1692	0	1692
TCGA-E2-A15J-01	TCGA-E2-A15J	BRCA	51	FEMALE	WHITE	Stage I		Infiltrating Ductal Carcinoma		2009	Pre (<6 months since LMP AND no prior bilateral ovariectomy AND not on estrogen replacement)	-18771	Alive	TUMOR FREE	1640								Negative		0	1640	0	1640	0	1640	0	1640
TCGA-E2-A15K-06	TCGA-E2-A15K	BRCA	58	FEMALE	WHITE	Stage IIB		Infiltrating Ductal Carcinoma		2010	Post (prior bilateral ovariectomy OR >12 mo since LMP with no prior hysterectomy)	-21514	Alive	TUMOR FREE	275								Negative		0	275	0	275	0	275	0	275
TCGA-E2-A15K-01	TCGA-E2-A15K	BRCA	58	FEMALE	WHITE	Stage IIB		Infiltrating Ductal Carcinoma		2010	Post (prior bilateral ovariectomy OR >12 mo since LMP with no prior hysterectomy)	-21514	Alive	TUMOR FREE	275								Negative		0	275	0	275	0	275	0	275
TCGA-E2-A15K-11	TCGA-E2-A15K	BRCA	58	FEMALE	WHITE	Stage IIB		Infiltrating Ductal Carcinoma		2010	Post (prior bilateral ovariectomy OR >12 mo since LMP with no prior hysterectomy)	-21514	Alive	TUMOR FREE	275								Negative		0	275	0	275	0	275	0	275
TCGA-E2-A15L-01	TCGA-E2-A15L	BRCA	65	FEMALE	BLACK OR AFRICAN AMERICAN	Stage IIA		Infiltrating Lobular Carcinoma		2010	Post (prior bilateral ovariectomy OR >12 mo since LMP with no prior hysterectomy)	-23845	Alive	TUMOR FREE	626								Negative		0	626	0	626	0	626	0	626
TCGA-E2-A15L-11	TCGA-E2-A15L	BRCA	65	FEMALE	BLACK OR AFRICAN AMERICAN	Stage IIA		Infiltrating Lobular Carcinoma		2010	Post (prior bilateral ovariectomy OR >12 mo since LMP with no prior hysterectomy)	-23845	Alive	TUMOR FREE	626								Negative		0	626	0	626	0	626	0	626
TCGA-E2-A15M-01	TCGA-E2-A15M	BRCA	66	FEMALE	WHITE	Stage IIA		Infiltrating Lobular Carcinoma		2010	Post (prior bilateral ovariectomy OR >12 mo since LMP with no prior hysterectomy)	-24266	Dead	TUMOR FREE		336							Negative		1	336	0	336	0	336	0	336
TCGA-E2-A15M-11	TCGA-E2-A15M	BRCA	66	FEMALE	WHITE	Stage IIA		Infiltrating Lobular Carcinoma		2010	Post (prior bilateral ovariectomy OR >12 mo since LMP with no prior hysterectomy)	-24266	Dead	TUMOR FREE		336							Negative		1	336	0	336	0	336	0	336
TCGA-E2-A15O-01	TCGA-E2-A15O	BRCA	89	FEMALE	BLACK OR AFRICAN AMERICAN	Stage I		Infiltrating Ductal Carcinoma		2010	Post (prior bilateral ovariectomy OR >12 mo since LMP with no prior hysterectomy)	-32583	Alive	TUMOR FREE	1545			Locoregional Recurrence			1210		Negative		0	1545	0	1545	1	1210	1	1210
TCGA-E2-A15P-01	TCGA-E2-A15P	BRCA	61	FEMALE	WHITE	Stage IA		Infiltrating Ductal Carcinoma		2010	Post (prior bilateral ovariectomy OR >12 mo since LMP with no prior hysterectomy)	-22524	Alive	TUMOR FREE	595								Negative		0	595	0	595	0	595	0	595
TCGA-E2-A15R-01	TCGA-E2-A15R	BRCA	64	FEMALE	WHITE	Stage IIA		Infiltrating Ductal Carcinoma		2010	Post (prior bilateral ovariectomy OR >12 mo since LMP with no prior hysterectomy)	-23570	Alive	TUMOR FREE	1732								Negative		0	1732	0	1732	0	1732	0	1732
TCGA-E2-A15S-01	TCGA-E2-A15S	BRCA	34	FEMALE	WHITE	Stage IIB		Infiltrating Ductal Carcinoma		2010	Post (prior bilateral ovariectomy OR >12 mo since LMP with no prior hysterectomy)	-12671	Alive	TUMOR FREE	428								Negative		0	428	0	428	0	428	0	428
TCGA-E2-A15T-01	TCGA-E2-A15T	BRCA	65	FEMALE	WHITE	Stage IIA		Infiltrating Ductal Carcinoma		2010	Post (prior bilateral ovariectomy OR >12 mo since LMP with no prior hysterectomy)	-24054	Alive	TUMOR FREE	1563								Negative		0	1563	0	1563	0	1563	0	1563
TCGA-E2-A1AZ-01	TCGA-E2-A1AZ	BRCA	63	FEMALE	WHITE	Stage IIB		Infiltrating Ductal Carcinoma		2004	Post (prior bilateral ovariectomy OR >12 mo since LMP with no prior hysterectomy)	-23230	Alive	TUMOR FREE	2329								Negative		0	2329	0	2329	0	2329	0	2329
TCGA-E2-A1B0-01	TCGA-E2-A1B0	BRCA	50	FEMALE	WHITE	Stage IIIA		Infiltrating Ductal Carcinoma		2007	Post (prior bilateral ovariectomy OR >12 mo since LMP with no prior hysterectomy)	-18346	Alive	TUMOR FREE	1631								Negative		0	1631	0	1631	0	1631	0	1631
TCGA-E2-A1B1-01	TCGA-E2-A1B1	BRCA	45	FEMALE	WHITE	Stage IIB		Infiltrating Ductal Carcinoma		2007	Post (prior bilateral ovariectomy OR >12 mo since LMP with no prior hysterectomy)	-16603	Alive	TUMOR FREE	2653								Negative		0	2653	0	2653	0	2653	0	2653
TCGA-E2-A1B4-01	TCGA-E2-A1B4	BRCA	74	FEMALE	WHITE	Stage IIIA		Infiltrating Ductal Carcinoma		2008	Post (prior bilateral ovariectomy OR >12 mo since LMP with no prior hysterectomy)	-27241	Dead	TUMOR FREE		1004							Negative		1	1004	0	1004	0	1004	0	1004
TCGA-E2-A1B5-01	TCGA-E2-A1B5	BRCA	46	FEMALE	WHITE	Stage IIA		Infiltrating Lobular Carcinoma		2008	Pre (<6 months since LMP AND no prior bilateral ovariectomy AND not on estrogen replacement)	-17039	Alive	TUMOR FREE	984								Negative		0	984	0	984	0	984	0	984
TCGA-E2-A1B5-11	TCGA-E2-A1B5	BRCA	46	FEMALE	WHITE	Stage IIA		Infiltrating Lobular Carcinoma		2008	Pre (<6 months since LMP AND no prior bilateral ovariectomy AND not on estrogen replacement)	-17039	Alive	TUMOR FREE	984								Negative		0	984	0	984	0	984	0	984
TCGA-E2-A1B6-01	TCGA-E2-A1B6	BRCA	44	FEMALE	WHITE	Stage IIA		Infiltrating Ductal Carcinoma		2008	Pre (<6 months since LMP AND no prior bilateral ovariectomy AND not on estrogen replacement)	-16370	Alive	TUMOR FREE	867								Negative		0	867	0	867	0	867	0	867
TCGA-E2-A1BC-01	TCGA-E2-A1BC	BRCA	63	FEMALE		Stage IA		Infiltrating Ductal Carcinoma		2010	Post (prior bilateral ovariectomy OR >12 mo since LMP with no prior hysterectomy)	-23168	Alive	TUMOR FREE	501								Positive		0	501	0	501			0	501
TCGA-E2-A1BC-11	TCGA-E2-A1BC	BRCA	63	FEMALE		Stage IA		Infiltrating Ductal Carcinoma		2010	Post (prior bilateral ovariectomy OR >12 mo since LMP with no prior hysterectomy)	-23168	Alive	TUMOR FREE	501								Positive		0	501	0	501			0	501
TCGA-E2-A1BD-01	TCGA-E2-A1BD	BRCA	53	FEMALE	WHITE	Stage IIA		Infiltrating Ductal Carcinoma		2010	Post (prior bilateral ovariectomy OR >12 mo since LMP with no prior hysterectomy)	-19627	Alive	TUMOR FREE	1133								Negative		0	1133	0	1133	0	1133	0	1133
TCGA-E2-A1IE-01	TCGA-E2-A1IE	BRCA	61	FEMALE	WHITE	Stage IIB		Infiltrating Ductal Carcinoma		2008	Post (prior bilateral ovariectomy OR >12 mo since LMP with no prior hysterectomy)	-22510	Alive	WITH TUMOR	2362			Distant Metastasis	Liver		1810		Negative		0	2362	0	2362	1	1810	1	1810
TCGA-E2-A1IF-01	TCGA-E2-A1IF	BRCA	74	FEMALE	WHITE	Stage I		Infiltrating Ductal Carcinoma		2008	Post (prior bilateral ovariectomy OR >12 mo since LMP with no prior hysterectomy)	-27341	Alive	TUMOR FREE	1138								Negative		0	1138	0	1138	0	1138	0	1138
TCGA-E2-A1IF-11	TCGA-E2-A1IF	BRCA	74	FEMALE	WHITE	Stage I		Infiltrating Ductal Carcinoma		2008	Post (prior bilateral ovariectomy OR >12 mo since LMP with no prior hysterectomy)	-27341	Alive	TUMOR FREE	1138								Negative		0	1138	0	1138	0	1138	0	1138
TCGA-E2-A1IG-01	TCGA-E2-A1IG	BRCA	45	FEMALE	WHITE	Stage IIB		Infiltrating Ductal Carcinoma		2009	Pre (<6 months since LMP AND no prior bilateral ovariectomy AND not on estrogen replacement)	-16757	Alive	TUMOR FREE	2140								Negative		0	2140	0	2140	0	2140	0	2140
TCGA-E2-A1IG-11	TCGA-E2-A1IG	BRCA	45	FEMALE	WHITE	Stage IIB		Infiltrating Ductal Carcinoma		2009	Pre (<6 months since LMP AND no prior bilateral ovariectomy AND not on estrogen replacement)	-16757	Alive	TUMOR FREE	2140								Negative		0	2140	0	2140	0	2140	0	2140
TCGA-E2-A1IH-01	TCGA-E2-A1IH	BRCA	80	FEMALE	WHITE	Stage I		Infiltrating Lobular Carcinoma		2008	Post (prior bilateral ovariectomy OR >12 mo since LMP with no prior hysterectomy)	-29444	Alive	TUMOR FREE	1026								Negative		0	1026	0	1026	0	1026	0	1026
TCGA-E2-A1II-01	TCGA-E2-A1II	BRCA	51	FEMALE	WHITE	Stage I		Infiltrating Ductal Carcinoma		2008	Post (prior bilateral ovariectomy OR >12 mo since LMP with no prior hysterectomy)	-18788	Alive	TUMOR FREE	1025								Negative		0	1025	0	1025	0	1025	0	1025
TCGA-E2-A1II-11	TCGA-E2-A1II	BRCA	51	FEMALE	WHITE	Stage I		Infiltrating Ductal Carcinoma		2008	Post (prior bilateral ovariectomy OR >12 mo since LMP with no prior hysterectomy)	-18788	Alive	TUMOR FREE	1025								Negative		0	1025	0	1025	0	1025	0	1025
TCGA-E2-A1IJ-01	TCGA-E2-A1IJ	BRCA	57	FEMALE	WHITE	Stage I		Infiltrating Lobular Carcinoma		2009	Post (prior bilateral ovariectomy OR >12 mo since LMP with no prior hysterectomy)	-20956	Alive	TUMOR FREE	865								Negative		0	865	0	865	0	865	0	865
TCGA-E2-A1IK-01	TCGA-E2-A1IK	BRCA	71	FEMALE	WHITE	Stage IIA		Infiltrating Ductal Carcinoma		2009	Post (prior bilateral ovariectomy OR >12 mo since LMP with no prior hysterectomy)	-26052	Alive	TUMOR FREE	1800								Negative		0	1800	0	1800	0	1800	0	1800
TCGA-E2-A1IL-01	TCGA-E2-A1IL	BRCA	78	FEMALE	WHITE	Stage IIA		Infiltrating Lobular Carcinoma		2009	Post (prior bilateral ovariectomy OR >12 mo since LMP with no prior hysterectomy)	-28495	Alive	TUMOR FREE	118								Negative		0	118	0	118	0	118	0	118
TCGA-E2-A1IN-01	TCGA-E2-A1IN	BRCA	60	FEMALE	WHITE	Stage I		Infiltrating Ductal Carcinoma		2010	Post (prior bilateral ovariectomy OR >12 mo since LMP with no prior hysterectomy)	-22199	Alive	TUMOR FREE	675								Negative		0	675	0	675	0	675	0	675
TCGA-E2-A1IO-01	TCGA-E2-A1IO	BRCA	37	FEMALE	WHITE	Stage I		Infiltrating Ductal Carcinoma		2009	Pre (<6 months since LMP AND no prior bilateral ovariectomy AND not on estrogen replacement)	-13671	Alive	TUMOR FREE	1855								Negative		0	1855	0	1855	0	1855	0	1855
TCGA-E2-A1IO-11	TCGA-E2-A1IO	BRCA	37	FEMALE	WHITE	Stage I		Infiltrating Ductal Carcinoma		2009	Pre (<6 months since LMP AND no prior bilateral ovariectomy AND not on estrogen replacement)	-13671	Alive	TUMOR FREE	1855								Negative		0	1855	0	1855	0	1855	0	1855
TCGA-E2-A1IU-01	TCGA-E2-A1IU	BRCA	60	FEMALE	WHITE	Stage IA		Infiltrating Ductal Carcinoma		2010	Post (prior bilateral ovariectomy OR >12 mo since LMP with no prior hysterectomy)	-22279	Alive	TUMOR FREE	337								Negative		0	337	0	337	0	337	0	337
TCGA-E2-A1L6-01	TCGA-E2-A1L6	BRCA	44	FEMALE	WHITE	Stage IIA		Infiltrating Ductal Carcinoma		2007	Pre (<6 months since LMP AND no prior bilateral ovariectomy AND not on estrogen replacement)	-16403	Alive	TUMOR FREE	1648								Negative		0	1648	0	1648	0	1648	0	1648
TCGA-E2-A1L7-01	TCGA-E2-A1L7	BRCA	40	FEMALE	WHITE	Stage IIIA		Infiltrating Ductal Carcinoma		2009	Pre (<6 months since LMP AND no prior bilateral ovariectomy AND not on estrogen replacement)	-14854	Alive	TUMOR FREE	1836			New Primary Tumor	Other, specify	left breast	1619		Negative		0	1836	0	1836	1	1619	1	1619
TCGA-E2-A1L7-11	TCGA-E2-A1L7	BRCA	40	FEMALE	WHITE	Stage IIIA		Infiltrating Ductal Carcinoma		2009	Pre (<6 months since LMP AND no prior bilateral ovariectomy AND not on estrogen replacement)	-14854	Alive	TUMOR FREE	1836			New Primary Tumor	Other, specify	left breast	1619		Negative		0	1836	0	1836	1	1619	1	1619
TCGA-E2-A1L8-01	TCGA-E2-A1L8	BRCA	52	FEMALE	BLACK OR AFRICAN AMERICAN	Stage IIB		Infiltrating Lobular Carcinoma		2008	Post (prior bilateral ovariectomy OR >12 mo since LMP with no prior hysterectomy)	-19187	Alive	TUMOR FREE	2240								Negative		0	2240	0	2240	0	2240	0	2240
TCGA-E2-A1L9-01	TCGA-E2-A1L9	BRCA	40	FEMALE	WHITE	Stage IIA		Infiltrating Ductal Carcinoma		2009	Pre (<6 months since LMP AND no prior bilateral ovariectomy AND not on estrogen replacement)	-14868	Alive	TUMOR FREE	598								Negative		0	598	0	598	0	598	0	598
TCGA-E2-A1LA-01	TCGA-E2-A1LA	BRCA	59	FEMALE		Stage IIA		Infiltrating Ductal Carcinoma		2009	Post (prior bilateral ovariectomy OR >12 mo since LMP with no prior hysterectomy)	-21773	Alive	TUMOR FREE	748								Negative		0	748	0	748	0	748	0	748
TCGA-E2-A1LB-01	TCGA-E2-A1LB	BRCA	41	FEMALE	BLACK OR AFRICAN AMERICAN	Stage IIB		Infiltrating Ductal Carcinoma		2008	Pre (<6 months since LMP AND no prior bilateral ovariectomy AND not on estrogen replacement)	-15283	Alive	TUMOR FREE	2306								Negative		0	2306	0	2306	0	2306	0	2306
TCGA-E2-A1LB-11	TCGA-E2-A1LB	BRCA	41	FEMALE	BLACK OR AFRICAN AMERICAN	Stage IIB		Infiltrating Ductal Carcinoma		2008	Pre (<6 months since LMP AND no prior bilateral ovariectomy AND not on estrogen replacement)	-15283	Alive	TUMOR FREE	2306								Negative		0	2306	0	2306	0	2306	0	2306
TCGA-E2-A1LE-01	TCGA-E2-A1LE	BRCA	71	FEMALE	WHITE	Stage IIIC		Infiltrating Ductal Carcinoma		2008	Post (prior bilateral ovariectomy OR >12 mo since LMP with no prior hysterectomy)	-26239	Dead	WITH TUMOR		879		Distant Metastasis	Lung		361		Negative		1	879	1	879	1	361	1	361
TCGA-E2-A1LG-01	TCGA-E2-A1LG	BRCA	50	FEMALE	BLACK OR AFRICAN AMERICAN	Stage IIA		Infiltrating Lobular Carcinoma		2010	Peri (6-12 months since last menstrual period)	-18492	Alive	TUMOR FREE	1523								Negative		0	1523	0	1523	0	1523	0	1523
TCGA-E2-A1LH-01	TCGA-E2-A1LH	BRCA	59	FEMALE	WHITE	Stage I		Infiltrating Ductal Carcinoma		2002	Post (prior bilateral ovariectomy OR >12 mo since LMP with no prior hysterectomy)	-21628	Alive	TUMOR FREE	3247								Negative		0	3247	0	3247	0	3247	0	3247
TCGA-E2-A1LH-11	TCGA-E2-A1LH	BRCA	59	FEMALE	WHITE	Stage I		Infiltrating Ductal Carcinoma		2002	Post (prior bilateral ovariectomy OR >12 mo since LMP with no prior hysterectomy)	-21628	Alive	TUMOR FREE	3247								Negative		0	3247	0	3247	0	3247	0	3247
TCGA-E2-A1LI-01	TCGA-E2-A1LI	BRCA	57	FEMALE	WHITE	Stage IIB		Infiltrating Ductal Carcinoma		2003	Post (prior bilateral ovariectomy OR >12 mo since LMP with no prior hysterectomy)	-21064	Alive	TUMOR FREE	3121								Close		0	3121	0	3121			0	3121
TCGA-E2-A1LI-11	TCGA-E2-A1LI	BRCA	57	FEMALE	WHITE	Stage IIB		Infiltrating Ductal Carcinoma		2003	Post (prior bilateral ovariectomy OR >12 mo since LMP with no prior hysterectomy)	-21064	Alive	TUMOR FREE	3121								Close		0	3121	0	3121			0	3121
TCGA-E2-A1LK-01	TCGA-E2-A1LK	BRCA	84	FEMALE	BLACK OR AFRICAN AMERICAN	Stage IIIC		Infiltrating Ductal Carcinoma		2008	Post (prior bilateral ovariectomy OR >12 mo since LMP with no prior hysterectomy)	-30757	Dead	WITH TUMOR		266		Locoregional Disease	Other, specify	Left axilla	155		Negative		1	266	1	266	1	155	1	155
TCGA-E2-A1LL-01	TCGA-E2-A1LL	BRCA	73	FEMALE	BLACK OR AFRICAN AMERICAN	Stage IIIA		Infiltrating Ductal Carcinoma		2008	Post (prior bilateral ovariectomy OR >12 mo since LMP with no prior hysterectomy)	-27028	Alive	WITH TUMOR	1309			Distant Metastasis	Liver		1303		Negative		0	1309	0	1309	1	1303	1	1303
TCGA-E2-A1LS-01	TCGA-E2-A1LS	BRCA	46	FEMALE	WHITE	Stage IA		Infiltrating Ductal Carcinoma		2010	Pre (<6 months since LMP AND no prior bilateral ovariectomy AND not on estrogen replacement)	-16887	Alive	TUMOR FREE	1604								Negative		0	1604	0	1604	0	1604	0	1604
TCGA-E2-A1LS-11	TCGA-E2-A1LS	BRCA	46	FEMALE	WHITE	Stage IA		Infiltrating Ductal Carcinoma		2010	Pre (<6 months since LMP AND no prior bilateral ovariectomy AND not on estrogen replacement)	-16887	Alive	TUMOR FREE	1604								Negative		0	1604	0	1604	0	1604	0	1604
TCGA-E2-A2P5-01	TCGA-E2-A2P5	BRCA	78	FEMALE	BLACK OR AFRICAN AMERICAN	Stage IIIC		Infiltrating Lobular Carcinoma		2011	Post (prior bilateral ovariectomy OR >12 mo since LMP with no prior hysterectomy)	-28621	Dead	WITH TUMOR		821		Distant Metastasis	Bone		597		Negative		1	821	1	821	1	597	1	597
TCGA-E2-A2P6-01	TCGA-E2-A2P6	BRCA	77	FEMALE		Stage IIB		Infiltrating Lobular Carcinoma		2011	Post (prior bilateral ovariectomy OR >12 mo since LMP with no prior hysterectomy)	-28411	Alive	TUMOR FREE	1051								Negative		0	1051	0	1051	0	1051	0	1051
TCGA-E2-A3DX-01	TCGA-E2-A3DX	BRCA	43	FEMALE	WHITE	Stage IIIC		Infiltrating Lobular Carcinoma		2011	Pre (<6 months since LMP AND no prior bilateral ovariectomy AND not on estrogen replacement)	-15969	Alive	TUMOR FREE	1325								Positive		0	1325	0	1325			0	1325
TCGA-E2-A56Z-01	TCGA-E2-A56Z	BRCA	69	FEMALE	BLACK OR AFRICAN AMERICAN	Stage IIB		Infiltrating Ductal Carcinoma		2012	Post (prior bilateral ovariectomy OR >12 mo since LMP with no prior hysterectomy)	-25282	Alive	TUMOR FREE	252								Negative		0	252	0	252	0	252	0	252
TCGA-E2-A570-01	TCGA-E2-A570	BRCA	47	FEMALE	BLACK OR AFRICAN AMERICAN	Stage IB		Infiltrating Ductal Carcinoma		2011	Pre (<6 months since LMP AND no prior bilateral ovariectomy AND not on estrogen replacement)	-17456	Alive	TUMOR FREE	931								Negative		0	931	0	931	0	931	0	931
TCGA-E2-A572-01	TCGA-E2-A572	BRCA	72	FEMALE	BLACK OR AFRICAN AMERICAN	Stage IIIA		Infiltrating Ductal Carcinoma		2011	Post (prior bilateral ovariectomy OR >12 mo since LMP with no prior hysterectomy)	-26399	Alive	TUMOR FREE	1208								Negative		0	1208	0	1208	0	1208	0	1208
TCGA-E2-A573-01	TCGA-E2-A573	BRCA	48	FEMALE	BLACK OR AFRICAN AMERICAN	Stage IA		Infiltrating Ductal Carcinoma		2011	Peri (6-12 months since last menstrual period)	-17689	Alive	TUMOR FREE	1062								Negative		0	1062	0	1062	0	1062	0	1062
TCGA-E2-A574-01	TCGA-E2-A574	BRCA	44	FEMALE	BLACK OR AFRICAN AMERICAN	Stage IIA		Infiltrating Ductal Carcinoma		2011	Pre (<6 months since LMP AND no prior bilateral ovariectomy AND not on estrogen replacement)	-16195	Alive	TUMOR FREE	1179								Negative		0	1179	0	1179	0	1179	0	1179
TCGA-E2-A576-01	TCGA-E2-A576	BRCA	69	FEMALE	BLACK OR AFRICAN AMERICAN	Stage IA		Infiltrating Lobular Carcinoma		2011	Post (prior bilateral ovariectomy OR >12 mo since LMP with no prior hysterectomy)	-25350	Alive	TUMOR FREE	1043								Negative		0	1043	0	1043	0	1043	0	1043
TCGA-E2-A9RU-01	TCGA-E2-A9RU	BRCA	90	FEMALE	BLACK OR AFRICAN AMERICAN	Stage IIIC		Infiltrating Ductal Carcinoma		2013	Post (prior bilateral ovariectomy OR >12 mo since LMP with no prior hysterectomy)	-32873	Alive	TUMOR FREE	538								Negative		0	538	0	538	0	538	0	538
TCGA-E9-A1N3-01	TCGA-E9-A1N3	BRCA	70	FEMALE	WHITE	Stage IIIA		Mixed Histology (please specify)		2010	Post (prior bilateral ovariectomy OR >12 mo since LMP with no prior hysterectomy)	-25714	Alive	TUMOR FREE	1059								Negative		0	1059	0	1059	0	1059	0	1059
TCGA-E9-A1N4-01	TCGA-E9-A1N4	BRCA	41	FEMALE	WHITE	Stage IIIA		Mixed Histology (please specify)		2010	Pre (<6 months since LMP AND no prior bilateral ovariectomy AND not on estrogen replacement)	-15055	Alive	TUMOR FREE	1000								Negative		0	1000	0	1000	0	1000	0	1000
TCGA-E9-A1N4-11	TCGA-E9-A1N4	BRCA	41	FEMALE	WHITE	Stage IIIA		Mixed Histology (please specify)		2010	Pre (<6 months since LMP AND no prior bilateral ovariectomy AND not on estrogen replacement)	-15055	Alive	TUMOR FREE	1000								Negative		0	1000	0	1000	0	1000	0	1000
TCGA-E9-A1N5-01	TCGA-E9-A1N5	BRCA	45	FEMALE	WHITE	Stage IIB		Mixed Histology (please specify)		2010	Post (prior bilateral ovariectomy OR >12 mo since LMP with no prior hysterectomy)	-16736	Alive	TUMOR FREE	1120								Negative		0	1120	0	1120	0	1120	0	1120
TCGA-E9-A1N5-11	TCGA-E9-A1N5	BRCA	45	FEMALE	WHITE	Stage IIB		Mixed Histology (please specify)		2010	Post (prior bilateral ovariectomy OR >12 mo since LMP with no prior hysterectomy)	-16736	Alive	TUMOR FREE	1120								Negative		0	1120	0	1120	0	1120	0	1120
TCGA-E9-A1N6-01	TCGA-E9-A1N6	BRCA	52	FEMALE	WHITE	Stage IIB		Infiltrating Ductal Carcinoma		2010	Post (prior bilateral ovariectomy OR >12 mo since LMP with no prior hysterectomy)	-19327	Dead	WITH TUMOR		678		Distant Metastasis	Bone		443		Negative		1	678	1	678	1	443	1	443
TCGA-E9-A1N6-11	TCGA-E9-A1N6	BRCA	52	FEMALE	WHITE	Stage IIB		Infiltrating Ductal Carcinoma		2010	Post (prior bilateral ovariectomy OR >12 mo since LMP with no prior hysterectomy)	-19327	Dead	WITH TUMOR		678		Distant Metastasis	Bone		443		Negative		1	678	1	678	1	443	1	443
TCGA-E9-A1N8-01	TCGA-E9-A1N8	BRCA	48	FEMALE	WHITE	Stage IIA		Infiltrating Ductal Carcinoma		2010	Post (prior bilateral ovariectomy OR >12 mo since LMP with no prior hysterectomy)	-17652	Alive	TUMOR FREE	1039								Negative		0	1039	0	1039	0	1039	0	1039
TCGA-E9-A1N8-11	TCGA-E9-A1N8	BRCA	48	FEMALE	WHITE	Stage IIA		Infiltrating Ductal Carcinoma		2010	Post (prior bilateral ovariectomy OR >12 mo since LMP with no prior hysterectomy)	-17652	Alive	TUMOR FREE	1039								Negative		0	1039	0	1039	0	1039	0	1039
TCGA-E9-A1N9-01	TCGA-E9-A1N9	BRCA	58	FEMALE	WHITE	Stage IIA		Mixed Histology (please specify)		2011	Post (prior bilateral ovariectomy OR >12 mo since LMP with no prior hysterectomy)	-21228	Alive	TUMOR FREE	1101								Negative		0	1101	0	1101	0	1101	0	1101
TCGA-E9-A1N9-11	TCGA-E9-A1N9	BRCA	58	FEMALE	WHITE	Stage IIA		Mixed Histology (please specify)		2011	Post (prior bilateral ovariectomy OR >12 mo since LMP with no prior hysterectomy)	-21228	Alive	TUMOR FREE	1101								Negative		0	1101	0	1101	0	1101	0	1101
TCGA-E9-A1NA-01	TCGA-E9-A1NA	BRCA	58	FEMALE	WHITE	Stage IIA		Mixed Histology (please specify)		2011	Post (prior bilateral ovariectomy OR >12 mo since LMP with no prior hysterectomy)	-21397	Alive	TUMOR FREE	1112								Negative		0	1112	0	1112	0	1112	0	1112
TCGA-E9-A1NA-11	TCGA-E9-A1NA	BRCA	58	FEMALE	WHITE	Stage IIA		Mixed Histology (please specify)		2011	Post (prior bilateral ovariectomy OR >12 mo since LMP with no prior hysterectomy)	-21397	Alive	TUMOR FREE	1112								Negative		0	1112	0	1112	0	1112	0	1112
TCGA-E9-A1NC-01	TCGA-E9-A1NC	BRCA	61	FEMALE	WHITE	Stage IIB		Mixed Histology (please specify)		2011	Post (prior bilateral ovariectomy OR >12 mo since LMP with no prior hysterectomy)	-22355	Alive	TUMOR FREE	1203								Negative		0	1203	0	1203	0	1203	0	1203	Redacted
TCGA-E9-A1ND-01	TCGA-E9-A1ND	BRCA	75	FEMALE	WHITE	Stage IIB		Infiltrating Ductal Carcinoma		2011	Post (prior bilateral ovariectomy OR >12 mo since LMP with no prior hysterectomy)	-27400	Alive	TUMOR FREE	1266								Negative		0	1266	0	1266	0	1266	0	1266
TCGA-E9-A1ND-11	TCGA-E9-A1ND	BRCA	75	FEMALE	WHITE	Stage IIB		Infiltrating Ductal Carcinoma		2011	Post (prior bilateral ovariectomy OR >12 mo since LMP with no prior hysterectomy)	-27400	Alive	TUMOR FREE	1266								Negative		0	1266	0	1266	0	1266	0	1266
TCGA-E9-A1NE-01	TCGA-E9-A1NE	BRCA	28	FEMALE	WHITE	Stage IIB		Infiltrating Ductal Carcinoma		2011	Pre (<6 months since LMP AND no prior bilateral ovariectomy AND not on estrogen replacement)	-10564	Alive	TUMOR FREE	1088								Negative		0	1088	0	1088	0	1088	0	1088
TCGA-E9-A1NE-11	TCGA-E9-A1NE	BRCA	28	FEMALE	WHITE	Stage IIB		Infiltrating Ductal Carcinoma		2011	Pre (<6 months since LMP AND no prior bilateral ovariectomy AND not on estrogen replacement)	-10564	Alive	TUMOR FREE	1088								Negative		0	1088	0	1088	0	1088	0	1088
TCGA-E9-A1NF-01	TCGA-E9-A1NF	BRCA	60	FEMALE	WHITE	Stage IIA		Mixed Histology (please specify)		2011	Post (prior bilateral ovariectomy OR >12 mo since LMP with no prior hysterectomy)	-21981	Dead	WITH TUMOR		1072		Distant Metastasis	Lung		90		Negative		1	1072	1	1072	1	90	1	90
TCGA-E9-A1NF-11	TCGA-E9-A1NF	BRCA	60	FEMALE	WHITE	Stage IIA		Mixed Histology (please specify)		2011	Post (prior bilateral ovariectomy OR >12 mo since LMP with no prior hysterectomy)	-21981	Dead	WITH TUMOR		1072		Distant Metastasis	Lung		90		Negative		1	1072	1	1072	1	90	1	90
TCGA-E9-A1NG-01	TCGA-E9-A1NG	BRCA	62	FEMALE	WHITE	Stage IIA		Infiltrating Ductal Carcinoma		2011	Post (prior bilateral ovariectomy OR >12 mo since LMP with no prior hysterectomy)	-22896	Dead	TUMOR FREE		786							Negative		1	786	0	786	0	786	0	786
TCGA-E9-A1NG-11	TCGA-E9-A1NG	BRCA	62	FEMALE	WHITE	Stage IIA		Infiltrating Ductal Carcinoma		2011	Post (prior bilateral ovariectomy OR >12 mo since LMP with no prior hysterectomy)	-22896	Dead	TUMOR FREE		786							Negative		1	786	0	786	0	786	0	786
TCGA-E9-A1NH-01	TCGA-E9-A1NH	BRCA	71	FEMALE	WHITE	Stage IIB		Infiltrating Ductal Carcinoma		2011	Post (prior bilateral ovariectomy OR >12 mo since LMP with no prior hysterectomy)	-26221	Alive	TUMOR FREE	576								Negative		0	576	0	576	0	576	0	576
TCGA-E9-A1NI-01	TCGA-E9-A1NI	BRCA	51	FEMALE	WHITE	Stage IIA		Mixed Histology (please specify)		2011	Post (prior bilateral ovariectomy OR >12 mo since LMP with no prior hysterectomy)	-18985	Alive	TUMOR FREE	300								Negative		0	300	0	300	0	300	0	300
TCGA-E9-A1QZ-01	TCGA-E9-A1QZ	BRCA	61	FEMALE	WHITE	Stage IIA		Infiltrating Ductal Carcinoma		2011	Post (prior bilateral ovariectomy OR >12 mo since LMP with no prior hysterectomy)	-22397	Alive	TUMOR FREE	755								Negative		0	755	0	755	0	755	0	755
TCGA-E9-A1R0-01	TCGA-E9-A1R0	BRCA	58	FEMALE	WHITE	Stage IIA		Infiltrating Ductal Carcinoma		2011	Post (prior bilateral ovariectomy OR >12 mo since LMP with no prior hysterectomy)	-21394	Alive	TUMOR FREE	860										0	860	0	860			0	860
TCGA-E9-A1R2-01	TCGA-E9-A1R2	BRCA	51	FEMALE	WHITE	Stage IIIC		Infiltrating Ductal Carcinoma		2011	Post (prior bilateral ovariectomy OR >12 mo since LMP with no prior hysterectomy)	-18936	Alive	TUMOR FREE	1063								Positive		0	1063	0	1063			0	1063
TCGA-E9-A1R3-01	TCGA-E9-A1R3	BRCA	70	FEMALE	WHITE	Stage IIIC		Infiltrating Ductal Carcinoma		2010	Post (prior bilateral ovariectomy OR >12 mo since LMP with no prior hysterectomy)	-25693	Alive	TUMOR FREE	78								Negative		0	78	0	78	0	78	0	78
TCGA-E9-A1R4-01	TCGA-E9-A1R4	BRCA	66	FEMALE	WHITE	Stage IA		Infiltrating Ductal Carcinoma		2011	Post (prior bilateral ovariectomy OR >12 mo since LMP with no prior hysterectomy)	-24181	Alive	TUMOR FREE	186								Negative		0	186	0	186	0	186	0	186
TCGA-E9-A1R5-01	TCGA-E9-A1R5	BRCA	63	FEMALE	WHITE	Stage IA		Infiltrating Ductal Carcinoma		2011	Post (prior bilateral ovariectomy OR >12 mo since LMP with no prior hysterectomy)	-23116	Alive	TUMOR FREE	92								Negative		0	92	0	92	0	92	0	92
TCGA-E9-A1R6-01	TCGA-E9-A1R6	BRCA	63	FEMALE	WHITE	Stage IIA		Infiltrating Ductal Carcinoma		2010	Post (prior bilateral ovariectomy OR >12 mo since LMP with no prior hysterectomy)	-23347	Alive	TUMOR FREE	339								Negative		0	339	0	339	0	339	0	339
TCGA-E9-A1R7-01	TCGA-E9-A1R7	BRCA	64	FEMALE	WHITE	Stage IIA		Infiltrating Ductal Carcinoma		2011	Post (prior bilateral ovariectomy OR >12 mo since LMP with no prior hysterectomy)	-23397	Alive	TUMOR FREE	1467								Negative		0	1467	0	1467	0	1467	0	1467
TCGA-E9-A1R7-11	TCGA-E9-A1R7	BRCA	64	FEMALE	WHITE	Stage IIA		Infiltrating Ductal Carcinoma		2011	Post (prior bilateral ovariectomy OR >12 mo since LMP with no prior hysterectomy)	-23397	Alive	TUMOR FREE	1467								Negative		0	1467	0	1467	0	1467	0	1467
TCGA-E9-A1RA-01	TCGA-E9-A1RA	BRCA	48	FEMALE	WHITE	Stage IA		Infiltrating Ductal Carcinoma		2011	Pre (<6 months since LMP AND no prior bilateral ovariectomy AND not on estrogen replacement)	-17699	Alive	TUMOR FREE	1369								Negative		0	1369	0	1369	0	1369	0	1369
TCGA-E9-A1RB-01	TCGA-E9-A1RB	BRCA	40	FEMALE	WHITE	Stage IIA		Infiltrating Ductal Carcinoma		2011	Pre (<6 months since LMP AND no prior bilateral ovariectomy AND not on estrogen replacement)	-14755	Dead	TUMOR FREE		976							Negative		1	976	0	976	0	976	0	976
TCGA-E9-A1RB-11	TCGA-E9-A1RB	BRCA	40	FEMALE	WHITE	Stage IIA		Infiltrating Ductal Carcinoma		2011	Pre (<6 months since LMP AND no prior bilateral ovariectomy AND not on estrogen replacement)	-14755	Dead	TUMOR FREE		976							Negative		1	976	0	976	0	976	0	976
TCGA-E9-A1RC-01	TCGA-E9-A1RC	BRCA	56	FEMALE	WHITE	Stage IIIC		Mixed Histology (please specify)		2007	Post (prior bilateral ovariectomy OR >12 mo since LMP with no prior hysterectomy)	-20795	Alive	TUMOR FREE	1224								Negative		0	1224	0	1224	0	1224	0	1224
TCGA-E9-A1RC-11	TCGA-E9-A1RC	BRCA	56	FEMALE	WHITE	Stage IIIC		Mixed Histology (please specify)		2007	Post (prior bilateral ovariectomy OR >12 mo since LMP with no prior hysterectomy)	-20795	Alive	TUMOR FREE	1224								Negative		0	1224	0	1224	0	1224	0	1224
TCGA-E9-A1RD-01	TCGA-E9-A1RD	BRCA	67	FEMALE	WHITE	Stage IIA		Infiltrating Ductal Carcinoma		2011	Post (prior bilateral ovariectomy OR >12 mo since LMP with no prior hysterectomy)	-24719	Alive	TUMOR FREE	34								Negative		0	34	0	34	0	34	0	34
TCGA-E9-A1RD-11	TCGA-E9-A1RD	BRCA	67	FEMALE	WHITE	Stage IIA		Infiltrating Ductal Carcinoma		2011	Post (prior bilateral ovariectomy OR >12 mo since LMP with no prior hysterectomy)	-24719	Alive	TUMOR FREE	34								Negative		0	34	0	34	0	34	0	34
TCGA-E9-A1RE-01	TCGA-E9-A1RE	BRCA	74	FEMALE	WHITE	Stage IIIA		Infiltrating Ductal Carcinoma		2011	Post (prior bilateral ovariectomy OR >12 mo since LMP with no prior hysterectomy)	-27392	Alive	TUMOR FREE	1419								Negative		0	1419	0	1419	0	1419	0	1419
TCGA-E9-A1RF-01	TCGA-E9-A1RF	BRCA	68	FEMALE	WHITE	Stage IIIA		Infiltrating Ductal Carcinoma		2011	Post (prior bilateral ovariectomy OR >12 mo since LMP with no prior hysterectomy)	-25119	Alive	TUMOR FREE	200								Negative		0	200	0	200	0	200	0	200
TCGA-E9-A1RF-11	TCGA-E9-A1RF	BRCA	68	FEMALE	WHITE	Stage IIIA		Infiltrating Ductal Carcinoma		2011	Post (prior bilateral ovariectomy OR >12 mo since LMP with no prior hysterectomy)	-25119	Alive	TUMOR FREE	200								Negative		0	200	0	200	0	200	0	200
TCGA-E9-A1RG-01	TCGA-E9-A1RG	BRCA	62	FEMALE	WHITE	Stage IIIA		Infiltrating Ductal Carcinoma		2011	Post (prior bilateral ovariectomy OR >12 mo since LMP with no prior hysterectomy)	-22788	Alive	TUMOR FREE	647								Negative		0	647	0	647	0	647	0	647
TCGA-E9-A1RH-01	TCGA-E9-A1RH	BRCA	63	FEMALE	WHITE	Stage IIA		Infiltrating Ductal Carcinoma		2011	Post (prior bilateral ovariectomy OR >12 mo since LMP with no prior hysterectomy)	-23224	Alive	TUMOR FREE	1417								Negative		0	1417	0	1417	0	1417	0	1417
TCGA-E9-A1RH-11	TCGA-E9-A1RH	BRCA	63	FEMALE	WHITE	Stage IIA		Infiltrating Ductal Carcinoma		2011	Post (prior bilateral ovariectomy OR >12 mo since LMP with no prior hysterectomy)	-23224	Alive	TUMOR FREE	1417								Negative		0	1417	0	1417	0	1417	0	1417
TCGA-E9-A1RI-01	TCGA-E9-A1RI	BRCA	43	FEMALE	WHITE	Stage IIIA		Mixed Histology (please specify)		2011	Pre (<6 months since LMP AND no prior bilateral ovariectomy AND not on estrogen replacement)	-15942	Alive	TUMOR FREE	1449								Negative		0	1449	0	1449	0	1449	0	1449
TCGA-E9-A1RI-11	TCGA-E9-A1RI	BRCA	43	FEMALE	WHITE	Stage IIIA		Mixed Histology (please specify)		2011	Pre (<6 months since LMP AND no prior bilateral ovariectomy AND not on estrogen replacement)	-15942	Alive	TUMOR FREE	1449								Negative		0	1449	0	1449	0	1449	0	1449
TCGA-E9-A226-01	TCGA-E9-A226	BRCA	45	FEMALE	WHITE	Stage IIIA		Infiltrating Ductal Carcinoma		2011	Pre (<6 months since LMP AND no prior bilateral ovariectomy AND not on estrogen replacement)	-16511	Dead	WITH TUMOR		1048		Distant Metastasis	Bone		790		Negative		1	1048	1	1048	1	790	1	790
TCGA-E9-A227-01	TCGA-E9-A227	BRCA	42	FEMALE	WHITE	Stage IIB		Infiltrating Ductal Carcinoma		2011	Pre (<6 months since LMP AND no prior bilateral ovariectomy AND not on estrogen replacement)	-15602	Alive	TUMOR FREE	975								Negative		0	975	0	975	0	975	0	975
TCGA-E9-A228-01	TCGA-E9-A228	BRCA	58	FEMALE	WHITE	Stage IIB		Infiltrating Ductal Carcinoma		2011	Post (prior bilateral ovariectomy OR >12 mo since LMP with no prior hysterectomy)	-21294	Alive	TUMOR FREE	1285								Negative		0	1285	0	1285	0	1285	0	1285
TCGA-E9-A229-01	TCGA-E9-A229	BRCA	37	FEMALE	WHITE	Stage IA		Infiltrating Ductal Carcinoma		2011	Pre (<6 months since LMP AND no prior bilateral ovariectomy AND not on estrogen replacement)	-13817	Alive	TUMOR FREE	1148								Negative		0	1148	0	1148	0	1148	0	1148
TCGA-E9-A22A-01	TCGA-E9-A22A	BRCA	74	FEMALE	WHITE	Stage IIA		Infiltrating Ductal Carcinoma		2011	Post (prior bilateral ovariectomy OR >12 mo since LMP with no prior hysterectomy)	-27288	Alive	TUMOR FREE	1189								Negative		0	1189	0	1189	0	1189	0	1189
TCGA-E9-A22B-01	TCGA-E9-A22B	BRCA	71	FEMALE	WHITE	Stage IA		Mixed Histology (please specify)		2011	Post (prior bilateral ovariectomy OR >12 mo since LMP with no prior hysterectomy)	-26278	Alive	TUMOR FREE	1167								Negative		0	1167	0	1167	0	1167	0	1167
TCGA-E9-A22D-01	TCGA-E9-A22D	BRCA	38	FEMALE	WHITE	Stage IIA		Infiltrating Ductal Carcinoma		2011	Pre (<6 months since LMP AND no prior bilateral ovariectomy AND not on estrogen replacement)	-14115	Alive	TUMOR FREE	1248								Negative		0	1248	0	1248	0	1248	0	1248
TCGA-E9-A22E-01	TCGA-E9-A22E	BRCA	56	FEMALE	WHITE	Stage IIIA		Infiltrating Ductal Carcinoma		2011	Post (prior bilateral ovariectomy OR >12 mo since LMP with no prior hysterectomy)	-20574	Alive	TUMOR FREE	1269								Negative		0	1269	0	1269	0	1269	0	1269
TCGA-E9-A22G-01	TCGA-E9-A22G	BRCA	47	FEMALE	WHITE	Stage IIA		Infiltrating Ductal Carcinoma		2011	Post (prior bilateral ovariectomy OR >12 mo since LMP with no prior hysterectomy)	-17300	Alive	TUMOR FREE	1239								Negative		0	1239	0	1239	0	1239	0	1239
TCGA-E9-A22H-01	TCGA-E9-A22H	BRCA	42	FEMALE	WHITE	Stage IIB		Infiltrating Ductal Carcinoma		2011	Pre (<6 months since LMP AND no prior bilateral ovariectomy AND not on estrogen replacement)	-15504	Alive	TUMOR FREE	1232								Negative		0	1232	0	1232	0	1232	0	1232
TCGA-E9-A243-01	TCGA-E9-A243	BRCA	52	FEMALE	WHITE	Stage IIA		Infiltrating Ductal Carcinoma		2011	Peri (6-12 months since last menstrual period)	-19035	Alive	WITH TUMOR	612			Distant Metastasis	Bone		305		Negative		0	612	0	612	1	305	1	305
TCGA-E9-A244-01	TCGA-E9-A244	BRCA	54	FEMALE	WHITE	Stage IIA		Infiltrating Ductal Carcinoma		2011	Post (prior bilateral ovariectomy OR >12 mo since LMP with no prior hysterectomy)	-19778	Alive	TUMOR FREE	21								Negative		0	21	0	21	0	21	0	21
TCGA-E9-A245-01	TCGA-E9-A245	BRCA	47	FEMALE	WHITE	Stage IIB		Infiltrating Ductal Carcinoma		2011	Pre (<6 months since LMP AND no prior bilateral ovariectomy AND not on estrogen replacement)	-17363	Alive	TUMOR FREE	26								Negative		0	26	0	26	0	26	0	26
TCGA-E9-A247-01	TCGA-E9-A247	BRCA	59	FEMALE	WHITE	Stage IA		Infiltrating Ductal Carcinoma		2011	Post (prior bilateral ovariectomy OR >12 mo since LMP with no prior hysterectomy)	-21562	Alive	TUMOR FREE	1186								Negative		0	1186	0	1186	0	1186	0	1186
TCGA-E9-A248-01	TCGA-E9-A248	BRCA	51	FEMALE	WHITE	Stage IIA		Infiltrating Ductal Carcinoma		2011	Peri (6-12 months since last menstrual period)	-18684	Alive	TUMOR FREE	59								Negative		0	59	0	59	0	59	0	59
TCGA-E9-A249-01	TCGA-E9-A249	BRCA	45	FEMALE	WHITE	Stage IIA		Infiltrating Ductal Carcinoma		2011	Pre (<6 months since LMP AND no prior bilateral ovariectomy AND not on estrogen replacement)	-16689	Alive	TUMOR FREE	217								Negative		0	217	0	217	0	217	0	217
TCGA-E9-A24A-01	TCGA-E9-A24A	BRCA	69	FEMALE	WHITE	Stage IIA		Infiltrating Ductal Carcinoma		2011	Post (prior bilateral ovariectomy OR >12 mo since LMP with no prior hysterectomy)	-25370	Alive	TUMOR FREE	747								Negative		0	747	0	747	0	747	0	747
TCGA-E9-A295-01	TCGA-E9-A295	BRCA	71	FEMALE	WHITE	Stage IIA		Infiltrating Lobular Carcinoma		2011	Post (prior bilateral ovariectomy OR >12 mo since LMP with no prior hysterectomy)	-25957	Alive	TUMOR FREE	375								Negative		0	375	0	375	0	375	0	375
TCGA-E9-A2JS-01	TCGA-E9-A2JS	BRCA	72	FEMALE	WHITE	Stage IIB		Infiltrating Lobular Carcinoma		2011	Post (prior bilateral ovariectomy OR >12 mo since LMP with no prior hysterectomy)	-26407	Dead	WITH TUMOR		904		Distant Metastasis	Bone	Liver	524		Negative		1	904	1	904	1	524	1	524
TCGA-E9-A2JT-01	TCGA-E9-A2JT	BRCA	63	FEMALE	WHITE	Stage IIA		Infiltrating Lobular Carcinoma		2011	Post (prior bilateral ovariectomy OR >12 mo since LMP with no prior hysterectomy)	-23318	Alive	TUMOR FREE	288								Negative		0	288	0	288	0	288	0	288
TCGA-E9-A3HO-01	TCGA-E9-A3HO	BRCA	49	FEMALE	WHITE	Stage IIA		Infiltrating Lobular Carcinoma		2011	Pre (<6 months since LMP AND no prior bilateral ovariectomy AND not on estrogen replacement)	-18046	Alive	TUMOR FREE	1158								Negative		0	1158	0	1158	0	1158	0	1158
TCGA-E9-A3Q9-01	TCGA-E9-A3Q9	BRCA	78	FEMALE	WHITE	Stage IIIC		Infiltrating Lobular Carcinoma		2011	Post (prior bilateral ovariectomy OR >12 mo since LMP with no prior hysterectomy)	-28715	Alive	TUMOR FREE	1001								Negative		0	1001	0	1001	0	1001	0	1001
TCGA-E9-A3QA-01	TCGA-E9-A3QA	BRCA	33	FEMALE	WHITE	Stage IIA		Medullary Carcinoma		2011	Pre (<6 months since LMP AND no prior bilateral ovariectomy AND not on estrogen replacement)	-12142	Alive	TUMOR FREE	918								Negative		0	918	0	918	0	918	0	918
TCGA-E9-A3X8-01	TCGA-E9-A3X8	BRCA	48	FEMALE	WHITE	Stage IIB		Infiltrating Lobular Carcinoma		2011	Post (prior bilateral ovariectomy OR >12 mo since LMP with no prior hysterectomy)	-17588	Alive	TUMOR FREE	926								Negative		0	926	0	926	0	926	0	926
TCGA-E9-A54X-01	TCGA-E9-A54X	BRCA	85	FEMALE	WHITE	Stage IA		Mucinous Carcinoma		2012	Post (prior bilateral ovariectomy OR >12 mo since LMP with no prior hysterectomy)	-31173	Alive	TUMOR FREE	727								Negative		0	727	0	727	0	727	0	727
TCGA-E9-A54Y-01	TCGA-E9-A54Y	BRCA	63	FEMALE	WHITE	Stage IIIA		Infiltrating Lobular Carcinoma		2012	Post (prior bilateral ovariectomy OR >12 mo since LMP with no prior hysterectomy)	-23057	Alive	TUMOR FREE	725								Negative		0	725	0	725	0	725	0	725
TCGA-E9-A5FK-01	TCGA-E9-A5FK	BRCA	60	FEMALE	WHITE	Stage IIIC		Infiltrating Lobular Carcinoma		2012	Post (prior bilateral ovariectomy OR >12 mo since LMP with no prior hysterectomy)	-22199	Alive	TUMOR FREE	812								Negative		0	812	0	812	0	812	0	812
TCGA-E9-A5FL-01	TCGA-E9-A5FL	BRCA	65	FEMALE	WHITE	Stage IIB		Metaplastic Carcinoma		2012	Post (prior bilateral ovariectomy OR >12 mo since LMP with no prior hysterectomy)	-24053	Alive	TUMOR FREE	24								Negative		0	24	0	24	0	24	0	24
TCGA-E9-A5UO-01	TCGA-E9-A5UO	BRCA	41	FEMALE	WHITE	Stage IIA		Mucinous Carcinoma		2012	Pre (<6 months since LMP AND no prior bilateral ovariectomy AND not on estrogen replacement)	-15050	Alive	TUMOR FREE	785								Negative		0	785	0	785	0	785	0	785
TCGA-E9-A5UP-01	TCGA-E9-A5UP	BRCA	63	FEMALE	WHITE	Stage IIA		Other, specify		2012	Post (prior bilateral ovariectomy OR >12 mo since LMP with no prior hysterectomy)	-23371	Alive	TUMOR FREE	803								Negative		0	803	0	803	0	803	0	803
TCGA-E9-A6HE-01	TCGA-E9-A6HE	BRCA	45	FEMALE	WHITE	Stage IIIC		Infiltrating Lobular Carcinoma		2012	Pre (<6 months since LMP AND no prior bilateral ovariectomy AND not on estrogen replacement)	-16697	Alive	TUMOR FREE	847								Negative		0	847	0	847	0	847	0	847
TCGA-EW-A1IW-01	TCGA-EW-A1IW	BRCA	80	FEMALE	WHITE	Stage IIB		Infiltrating Lobular Carcinoma		2010	Post (prior bilateral ovariectomy OR >12 mo since LMP with no prior hysterectomy)	-29529	Alive	TUMOR FREE	371								Negative		0	371	0	371	0	371	0	371
TCGA-EW-A1IX-01	TCGA-EW-A1IX	BRCA	48	FEMALE	ASIAN	Stage IIA		Other, specify		2008	Peri (6-12 months since last menstrual period)	-17597	Alive	TUMOR FREE	1208								Negative		0	1208	0	1208	0	1208	0	1208
TCGA-EW-A1IY-01	TCGA-EW-A1IY	BRCA	38	FEMALE	ASIAN	Stage I		Infiltrating Ductal Carcinoma		2009	Pre (<6 months since LMP AND no prior bilateral ovariectomy AND not on estrogen replacement)	-14122	Alive	TUMOR FREE	258								Negative		0	258	0	258	0	258	0	258
TCGA-EW-A1IZ-01	TCGA-EW-A1IZ	BRCA	53	FEMALE	WHITE	Stage IIIA		Infiltrating Ductal Carcinoma		2010	Post (prior bilateral ovariectomy OR >12 mo since LMP with no prior hysterectomy)	-19706	Alive	TUMOR FREE	554								Negative		0	554	0	554	0	554	0	554
TCGA-EW-A1J1-01	TCGA-EW-A1J1	BRCA	38	FEMALE	WHITE	Stage IIB		Infiltrating Ductal Carcinoma		2010	Pre (<6 months since LMP AND no prior bilateral ovariectomy AND not on estrogen replacement)	-14122	Alive	TUMOR FREE	575								Negative		0	575	0	575	0	575	0	575
TCGA-EW-A1J2-01	TCGA-EW-A1J2	BRCA	50	FEMALE	BLACK OR AFRICAN AMERICAN	[Discrepancy]		Infiltrating Lobular Carcinoma		2010	Pre (<6 months since LMP AND no prior bilateral ovariectomy AND not on estrogen replacement)	-18558	Alive	TUMOR FREE	403								Negative		0	403	0	403	0	403	0	403
TCGA-EW-A1J3-01	TCGA-EW-A1J3	BRCA	61	FEMALE	WHITE	Stage IA		Infiltrating Lobular Carcinoma		2010	Post (prior bilateral ovariectomy OR >12 mo since LMP with no prior hysterectomy)	-22332	Alive	TUMOR FREE	504								Negative		0	504	0	504	0	504	0	504
TCGA-EW-A1J5-01	TCGA-EW-A1J5	BRCA	59	FEMALE	WHITE	Stage IIB		Infiltrating Lobular Carcinoma		2010	Post (prior bilateral ovariectomy OR >12 mo since LMP with no prior hysterectomy)	-21559	Alive	TUMOR FREE	477								Negative		0	477	0	477	0	477	0	477
TCGA-EW-A1J6-01	TCGA-EW-A1J6	BRCA	70	FEMALE	WHITE	Stage I		Infiltrating Ductal Carcinoma		2009	Post (prior bilateral ovariectomy OR >12 mo since LMP with no prior hysterectomy)	-25830	Alive	TUMOR FREE	875								Negative		0	875	0	875	0	875	0	875
TCGA-EW-A1OV-01	TCGA-EW-A1OV	BRCA	56	FEMALE	WHITE	Stage IIB		Infiltrating Ductal Carcinoma		2009	Post (prior bilateral ovariectomy OR >12 mo since LMP with no prior hysterectomy)	-20764	Alive	TUMOR FREE	789								Negative		0	789	0	789	0	789	0	789
TCGA-EW-A1OW-01	TCGA-EW-A1OW	BRCA	58	FEMALE	BLACK OR AFRICAN AMERICAN	Stage IIA		Infiltrating Ductal Carcinoma		2009	Post (prior bilateral ovariectomy OR >12 mo since LMP with no prior hysterectomy)	-21465	Alive	TUMOR FREE	694								Negative		0	694	0	694	0	694	0	694
TCGA-EW-A1OX-01	TCGA-EW-A1OX	BRCA	43	FEMALE	WHITE	Stage IIA		Mucinous Carcinoma		2009	Pre (<6 months since LMP AND no prior bilateral ovariectomy AND not on estrogen replacement)	-15837	Alive	TUMOR FREE	911								Negative		0	911	0	911	0	911	0	911
TCGA-EW-A1OY-01	TCGA-EW-A1OY	BRCA	63	FEMALE	WHITE	Stage IIA		Infiltrating Ductal Carcinoma		2009	Post (prior bilateral ovariectomy OR >12 mo since LMP with no prior hysterectomy)	-23266	Alive	TUMOR FREE	908								Negative		0	908	0	908	0	908	0	908
TCGA-EW-A1OZ-01	TCGA-EW-A1OZ	BRCA	56	FEMALE	BLACK OR AFRICAN AMERICAN	Stage IIA		Infiltrating Ductal Carcinoma		2008	Post (prior bilateral ovariectomy OR >12 mo since LMP with no prior hysterectomy)	-20664	Alive	TUMOR FREE	1229								Negative		0	1229	0	1229	0	1229	0	1229
TCGA-EW-A1P0-01	TCGA-EW-A1P0	BRCA	55	FEMALE	WHITE	Stage IIB		Other, specify		2008	Post (prior bilateral ovariectomy OR >12 mo since LMP with no prior hysterectomy)	-20107	Alive	TUMOR FREE	1251			Distant Metastasis	Other, specify	mediastinal lymph node	1094		Negative		0	1251	0	1251	1	1094	1	1094
TCGA-EW-A1P1-01	TCGA-EW-A1P1	BRCA	68	FEMALE	WHITE	Stage IIIC		Infiltrating Ductal Carcinoma		2008	Post (prior bilateral ovariectomy OR >12 mo since LMP with no prior hysterectomy)	-24923	Alive	TUMOR FREE	1210			Distant Metastasis	Lung		1014		Negative		0	1210	0	1210	1	1014	1	1014
TCGA-EW-A1P3-01	TCGA-EW-A1P3	BRCA	48	FEMALE	WHITE	Stage IIA		Infiltrating Ductal Carcinoma		2008	Pre (<6 months since LMP AND no prior bilateral ovariectomy AND not on estrogen replacement)	-17637	Alive	TUMOR FREE	1611								Negative		0	1611	0	1611	0	1611	0	1611
TCGA-EW-A1P4-01	TCGA-EW-A1P4	BRCA	43	FEMALE	WHITE	Stage IIA		Medullary Carcinoma		2009	Pre (<6 months since LMP AND no prior bilateral ovariectomy AND not on estrogen replacement)	-15989	Alive	TUMOR FREE	907								Negative		0	907	0	907	0	907	0	907
TCGA-EW-A1P5-01	TCGA-EW-A1P5	BRCA	77	FEMALE	WHITE	Stage IIB		Infiltrating Ductal Carcinoma		2010	Post (prior bilateral ovariectomy OR >12 mo since LMP with no prior hysterectomy)	-28177	Alive	TUMOR FREE	703								Negative		0	703	0	703	0	703	0	703
[truncated: 10,957 more rows]

## Sheet: Table S4
Supplementary Table S4. Expression levels of IDO1 comparing tumor and normal tissues in K-M survival curves(OS).
ID	futime	fustat	IDO1	Type	CancerType
TCGA-OR-A5KZ-01A	125	1	0.459809	Tumor	ACC
[truncated: 10,120 more rows]
